# Supplementary material for: Integrated transcriptomic and pathway analyses of sorghum plants revealed the molecular mechanisms of host defense against aphids
Source: Front Plant Sci. 2024 Jun 6;15:1324085. doi: 10.3389/fpls.2024.1324085 (PMC11187118; doi:10.3389/fpls.2024.1324085)
Supplement: Supplementary Table 8 — KEGG annotation from the DEGs of resistant Tx2783 and susceptible BTx623 sorghum genotypes exposed to sugarcane aphid infestation (Excel sheet). [file Table_3.xlsx]

## Sheet: Tx2783_3dpi
Gene ID	KO	Gene name	Tier 1	Tier 2	Tier 3	Log2-fold change	p-adjusted
Sobic.010G084600	K05894	OPR; 12-oxophytodienoic acid reductase [EC:1.3.1.42]	A09100 Metabolism	B 09103 Lipid metabolism	C 00592 alpha-Linolenic acid metabolism [PATH:ko00592]	7.70686	4.53664e-05
Sobic.010G183600	K16241	HY5; transcription factor HY5	A09150 Organismal Systems	B 09159 Environmental adaptation	0	4.98261	2.30603e-13
Sobic.010G171900	K00423	E1.10.3.3; L-ascorbate oxidase [EC:1.10.3.3]	A09100 Metabolism	B 09101 Carbohydrate metabolism	C 00053 Ascorbate and aldarate metabolism [PATH:ko00053]	3.61607	1.13377e-09
Sobic.010G108301	K15397	KCS; 3-ketoacyl-CoA synthase [EC:2.3.1.199]	A09100 Metabolism	B 09103 Lipid metabolism	C 00062 Fatty acid elongation [PATH:ko00062]	6.28559	0.027685
Sobic.010G064200	K11000	CALS; callose synthase [EC:2.4.1.-]	A09180 Brite Hierarchies	B 09181 Protein families: metabolism	C 01003 Glycosyltransferases [BR:ko01003]	2.03616	0.0380026
Sobic.010G104300	K13993	HSP20; HSP20 family protein	A09120 Genetic Information Processing	B 09123 Folding, sorting and degradation	C 04141 Protein processing in endoplasmic reticulum [PATH:ko04141]	5.96828	0.0671735
Sobic.010G120600	K23154	CGT; 2-hydroxyflavanone C-glucosyltransferase [EC:2.4.1.360]	A09180 Brite Hierarchies	B 09191 Unclassified: metabolism	C 99980 Enzymes with EC numbers	2.61386	1.8331e-07
Sobic.010G222100	K10523	SPOP; speckle-type POZ protein	A09130 Environmental Information Processing	B 09132 Signal transduction	C 04340 Hedgehog signaling pathway [PATH:ko04340]	3.05973	0.000730021
Sobic.010G192366	K14431	TGA; transcription factor TGA	A09130 Environmental Information Processing	B 09132 Signal transduction	C 04075 Plant hormone signal transduction [PATH:ko04075]	3.42142	0.000333459
Sobic.010G277700	K00791	miaA, TRIT1; tRNA dimethylallyltransferase [EC:2.5.1.75]	A09100 Metabolism	B 09109 Metabolism of terpenoids and polyketides	C 00908 Zeatin biosynthesis [PATH:ko00908]	2.50837	0.000136291
Sobic.010G182966	K15639	CYP734A1, BAS1; PHYB activation tagged suppressor 1 [EC:1.14.-.-]	A09100 Metabolism	B 09109 Metabolism of terpenoids and polyketides	C 00905 Brassinosteroid biosynthesis [PATH:ko00905]	2.29703	0.00397218
Sobic.010G104600	K17991	PXG; peroxygenase [EC:1.11.2.3]	A09100 Metabolism	B 09103 Lipid metabolism	C 00073 Cutin, suberine and wax biosynthesis [PATH:ko00073]	7.80947	2.23964e-05
Sobic.010G084700	K05894	OPR; 12-oxophytodienoic acid reductase [EC:1.3.1.42]	A09100 Metabolism	B 09103 Lipid metabolism	C 00592 alpha-Linolenic acid metabolism [PATH:ko00592]	10.0549	7.37401e-15
Sobic.010G084400	K05894	OPR; 12-oxophytodienoic acid reductase [EC:1.3.1.42]	A09100 Metabolism	B 09103 Lipid metabolism	C 00592 alpha-Linolenic acid metabolism [PATH:ko00592]	5.77892	0.104703
Sobic.010G020200	K13449	PR1; pathogenesis-related protein 1	A09130 Environmental Information Processing	B 09132 Signal transduction	C 04016 MAPK signaling pathway - plant [PATH:ko04016]	3.23544	6.2268e-09
Sobic.010G104800	K17991	PXG; peroxygenase [EC:1.11.2.3]	A09100 Metabolism	B 09103 Lipid metabolism	C 00073 Cutin, suberine and wax biosynthesis [PATH:ko00073]	3.22919	9.82003e-11
Sobic.010G178500	K03627	MBF1; putative transcription factor	A09180 Brite Hierarchies	B 09192 Unclassified: genetic information processing	C 99973 Transcription	6.13564	0.0432527
Sobic.010G247600	K17506	PPM1L, PP2CE; protein phosphatase 1L [EC:3.1.3.16]	A09180 Brite Hierarchies	B 09181 Protein families: metabolism	C 01009 Protein phosphatases and associated proteins [BR:ko01009]	2.53757	0.00598856
Sobic.010G259300	K19861	BEBT, AMAT; benzyl alcohol O-benzoyltransferase [EC:2.3.1.196 2.3.1.232]	A09180 Brite Hierarchies	B 09191 Unclassified: metabolism	C 99980 Enzymes with EC numbers	2.07362	0.000440566
Sobic.010G188300	K01623	ALDO; fructose-bisphosphate aldolase, class I [EC:4.1.2.13]	A09100 Metabolism	B 09101 Carbohydrate metabolism	C 00010 Glycolysis / Gluconeogenesis [PATH:ko00010]	2.89725	4.6773e-09
Sobic.010G224600	K14488	SAUR; SAUR family protein	A09130 Environmental Information Processing	B 09132 Signal transduction	C 04075 Plant hormone signal transduction [PATH:ko04075]	7.59638	9.42251e-05
Sobic.010G252500	K14488	SAUR; SAUR family protein	A09130 Environmental Information Processing	B 09132 Signal transduction	C 04075 Plant hormone signal transduction [PATH:ko04075]	2.91983	1.58908e-05
Sobic.010G224501	K14488	SAUR; SAUR family protein	A09130 Environmental Information Processing	B 09132 Signal transduction	C 04075 Plant hormone signal transduction [PATH:ko04075]	2.03507	0.000905381
Sobic.010G069900	K20660	CYP709; cytochrome P450 family 709	A09180 Brite Hierarchies	B 09181 Protein families: metabolism	C 00199 Cytochrome P450 [BR:ko00199]	3.49496	4.11948e-07
Sobic.010G240300	K05350	bglB; beta-glucosidase [EC:3.2.1.21]	A09100 Metabolism	B 09101 Carbohydrate metabolism	C 00500 Starch and sucrose metabolism [PATH:ko00500]	6.13564	0.0432527
Sobic.010G066601	K13065	E2.3.1.133, HCT; shikimate O-hydroxycinnamoyltransferase [EC:2.3.1.133]	A09100 Metabolism	B 09110 Biosynthesis of other secondary metabolites	C 00940 Phenylpropanoid biosynthesis [PATH:ko00940]	2.22351	0.00397218
Sobic.003G268700	K20716	MAPKKK17_18; mitogen-activated protein kinase kinase kinase 17/18	A09130 Environmental Information Processing	B 09132 Signal transduction	C 04016 MAPK signaling pathway - plant [PATH:ko04016]	2.70624	4.35215e-06
Sobic.003G371400	K14638	SLC15A3_4, PHT; solute carrier family 15 (peptide/histidine transporter), member 3/4	A09180 Brite Hierarchies	B 09183 Protein families: signaling and cellular processes	C 02000 Transporters [BR:ko02000]	7.53779	0.000135471
Sobic.003G152100	K00430	E1.11.1.7; peroxidase [EC:1.11.1.7]	A09100 Metabolism	B 09110 Biosynthesis of other secondary metabolites	C 00940 Phenylpropanoid biosynthesis [PATH:ko00940]	8.59264	5.31652e-08
Sobic.003G244600	K01183	E3.2.1.14; chitinase [EC:3.2.1.14]	A09100 Metabolism	B 09101 Carbohydrate metabolism	C 00520 Amino sugar and nucleotide sugar metabolism [PATH:ko00520]	3.14843	2.82376e-10
Sobic.003G148300	K01051	E3.1.1.11; pectinesterase [EC:3.1.1.11]	A09100 Metabolism	B 09101 Carbohydrate metabolism	C 00040 Pentose and glucuronate interconversions [PATH:ko00040]	2.53757	0.00598856
Sobic.003G264500	K00799	GST, gst; glutathione S-transferase [EC:2.5.1.18]	A09100 Metabolism	B 09106 Metabolism of other amino acids	C 00480 Glutathione metabolism [PATH:ko00480]	9.077	4.26237e-10
Sobic.003G050800	K15283	SLC35E1; solute carrier family 35, member E1	A09180 Brite Hierarchies	B 09183 Protein families: signaling and cellular processes	C 02000 Transporters [BR:ko02000]	2.10913	2.29833e-05
Sobic.003G371600	K14638	SLC15A3_4, PHT; solute carrier family 15 (peptide/histidine transporter), member 3/4	A09180 Brite Hierarchies	B 09183 Protein families: signaling and cellular processes	C 02000 Transporters [BR:ko02000]	3.01276	5.11029e-09
Sobic.003G017200	K16223	FT; protein FLOWERING LOCUS T	A09150 Organismal Systems	B 09159 Environmental adaptation	0	3.73589	0.0160304
Sobic.003G313800	K00279	CKX; cytokinin dehydrogenase [EC:1.5.99.12]	A09100 Metabolism	B 09109 Metabolism of terpenoids and polyketides	C 00908 Zeatin biosynthesis [PATH:ko00908]	5.16133	1.54867e-17
Sobic.003G430400	K13448	CML; calcium-binding protein CML	A09150 Organismal Systems	B 09159 Environmental adaptation	0	7.59638	9.42251e-05
Sobic.003G242200	K14497	PP2C; protein phosphatase 2C [EC:3.1.3.16]	A09130 Environmental Information Processing	B 09132 Signal transduction	C 04016 MAPK signaling pathway - plant [PATH:ko04016]	5.96828	0.0671735
Sobic.003G202200	K22522	LOG; cytokinin riboside 5'-monophosphate phosphoribohydrolase [EC:3.2.2.-]	A09180 Brite Hierarchies	B 09191 Unclassified: metabolism	C 99980 Enzymes with EC numbers	2.00931	9.07633e-05
Sobic.003G273000	K21604	IAR3, ILL6; jasmonoyl-L-amino acid hydrolase [EC:3.5.1.127]	A09180 Brite Hierarchies	B 09181 Protein families: metabolism	C 01002 Peptidases and inhibitors [BR:ko01002]	3.73104	5.64529e-06
Sobic.003G306500	K14487	GH3; auxin responsive GH3 gene family	A09130 Environmental Information Processing	B 09132 Signal transduction	C 04075 Plant hormone signal transduction [PATH:ko04075]	7.12534	0.00140155
Sobic.003G169400	K03046	rpoC; DNA-directed RNA polymerase subunit beta' [EC:2.7.7.6]	A09120 Genetic Information Processing	B 09121 Transcription	C 03020 RNA polymerase [PATH:ko03020]	3.43408	6.51579e-05
Sobic.003G379500	K05282	GA20ox; gibberellin-44 dioxygenase [EC:1.14.11.12]	A09100 Metabolism	B 09109 Metabolism of terpenoids and polyketides	C 00904 Diterpenoid biosynthesis [PATH:ko00904]	3.45976	5.96004e-11
Sobic.003G203600	K12355	REF1; coniferyl-aldehyde dehydrogenase [EC:1.2.1.68]	A09100 Metabolism	B 09110 Biosynthesis of other secondary metabolites	C 00940 Phenylpropanoid biosynthesis [PATH:ko00940]	3.82591	3.79406e-08
Sobic.003G323500	K17609	NXN; nucleoredoxin [EC:1.8.1.8]	A09180 Brite Hierarchies	B 09181 Protein families: metabolism	C 01009 Protein phosphatases and associated proteins [BR:ko01009]	2.93507	1.84643e-08
Sobic.003G231300	K05917	CYP51; sterol 14alpha-demethylase [EC:1.14.14.154 1.14.15.36]	A09100 Metabolism	B 09103 Lipid metabolism	C 00100 Steroid biosynthesis [PATH:ko00100]	6.42141	0.0177562
Sobic.003G426200	K00799	GST, gst; glutathione S-transferase [EC:2.5.1.18]	A09100 Metabolism	B 09106 Metabolism of other amino acids	C 00480 Glutathione metabolism [PATH:ko00480]	3.07615	1.90204e-05
Sobic.003G226600	K13425	WRKY22; WRKY transcription factor 22	A09130 Environmental Information Processing	B 09132 Signal transduction	C 04016 MAPK signaling pathway - plant [PATH:ko04016]	7.53779	0.000135471
Sobic.003G385500	K15718	LOX1_5; linoleate 9S-lipoxygenase [EC:1.13.11.58]	A09100 Metabolism	B 09103 Lipid metabolism	C 00591 Linoleic acid metabolism [PATH:ko00591]	5.54398	2.43647e-25
Sobic.003G282800	K18159	NDUFAF1, CIA30; NADH dehydrogenase [ubiquinone] 1 alpha subcomplex assembly factor 1	A09150 Organismal Systems	B 09159 Environmental adaptation	0	7.70686	4.53664e-05
Sobic.003G018800	K23978	IAH1; isoamyl acetate esterase [EC:3.1.1.112]	A09180 Brite Hierarchies	B 09191 Unclassified: metabolism	C 99980 Enzymes with EC numbers	8.1979	1.22317e-06
Sobic.003G068300	K13065	E2.3.1.133, HCT; shikimate O-hydroxycinnamoyltransferase [EC:2.3.1.133]	A09100 Metabolism	B 09110 Biosynthesis of other secondary metabolites	C 00940 Phenylpropanoid biosynthesis [PATH:ko00940]	3.6732	6.58651e-11
Sobic.003G341100	K13424	WRKY33; WRKY transcription factor 33	A09130 Environmental Information Processing	B 09132 Signal transduction	C 04016 MAPK signaling pathway - plant [PATH:ko04016]	2.59185	1.74834e-05
Sobic.003G111500	K13789	GGPS; geranylgeranyl diphosphate synthase, type II [EC:2.5.1.1 2.5.1.10 2.5.1.29]	A09100 Metabolism	B 09109 Metabolism of terpenoids and polyketides	C 00900 Terpenoid backbone biosynthesis [PATH:ko00900]	2.00167	0.0148563
Sobic.003G297600	K13433	PTI5; pathogenesis-related genes transcriptional activator PTI5	A09150 Organismal Systems	B 09159 Environmental adaptation	0	3.06763	6.20498e-07
Sobic.003G312300	K00547	mmuM, BHMT2; homocysteine S-methyltransferase [EC:2.1.1.10]	A09100 Metabolism	B 09105 Amino acid metabolism	C 00270 Cysteine and methionine metabolism [PATH:ko00270]	7.65267	6.53954e-05
Sobic.003G116800	K09753	CCR; cinnamoyl-CoA reductase [EC:1.2.1.44]	A09100 Metabolism	B 09110 Biosynthesis of other secondary metabolites	C 00940 Phenylpropanoid biosynthesis [PATH:ko00940]	7.2028	0.000931109
Sobic.003G230900	K13082	DFR; bifunctional dihydroflavonol 4-reductase/flavanone 4-reductase [EC:1.1.1.219 1.1.1.234]	A09100 Metabolism	B 09110 Biosynthesis of other secondary metabolites	C 00941 Flavonoid biosynthesis [PATH:ko00941]	5.77892	0.104703
Sobic.003G164800	K00799	GST, gst; glutathione S-transferase [EC:2.5.1.18]	A09100 Metabolism	B 09106 Metabolism of other amino acids	C 00480 Glutathione metabolism [PATH:ko00480]	5.96828	0.0671735
Sobic.003G100000	K05350	bglB; beta-glucosidase [EC:3.2.1.21]	A09100 Metabolism	B 09101 Carbohydrate metabolism	C 00500 Starch and sucrose metabolism [PATH:ko00500]	2.06342	0.0545126
Sobic.003G041500	K14553	UTP18; U3 small nucleolar RNA-associated protein 18	A09120 Genetic Information Processing	B 09122 Translation	C 03008 Ribosome biogenesis in eukaryotes [PATH:ko03008]	3.37285	0.000103962
Sobic.003G355500	K00002	AKR1A1, adh; alcohol dehydrogenase (NADP+) [EC:1.1.1.2]	A09100 Metabolism	B 09101 Carbohydrate metabolism	C 00010 Glycolysis / Gluconeogenesis [PATH:ko00010]	2.53058	3.29763e-07
Sobic.003G030200	K01598	PPCDC, coaC; phosphopantothenoylcysteine decarboxylase [EC:4.1.1.36]	A09100 Metabolism	B 09108 Metabolism of cofactors and vitamins	C 00770 Pantothenate and CoA biosynthesis [PATH:ko00770]	2.50597	0.000891199
Sobic.003G218500	K06130	LYPLA2; lysophospholipase II [EC:3.1.1.5]	A09100 Metabolism	B 09103 Lipid metabolism	C 00564 Glycerophospholipid metabolism [PATH:ko00564]	3.20496	0.00905757
Sobic.003G154400	K16297	SCPL-II; serine carboxypeptidase-like clade II [EC:3.4.16.-]	A09180 Brite Hierarchies	B 09181 Protein families: metabolism	C 01002 Peptidases and inhibitors [BR:ko01002]	2.72308	0.046094
Sobic.003G134100	K03264	EIF6; translation initiation factor 6	A09120 Genetic Information Processing	B 09122 Translation	C 03008 Ribosome biogenesis in eukaryotes [PATH:ko03008]	6.54554	0.0114578
Sobic.003G017300	K01937	pyrG, CTPS; CTP synthase [EC:6.3.4.2]	A09100 Metabolism	B 09104 Nucleotide metabolism	C 00240 Pyrimidine metabolism [PATH:ko00240]	6.54554	0.0114578
Sobic.003G280500	K03234	EEF2; elongation factor 2	A09130 Environmental Information Processing	B 09132 Signal transduction	C 04152 AMPK signaling pathway [PATH:ko04152]	7.47673	0.000194432
Sobic.003G226800	K09419	HSFF; heat shock transcription factor, other eukaryote	A09180 Brite Hierarchies	B 09182 Protein families: genetic information processing	C 03000 Transcription factors [BR:ko03000]	2.33581	0.00135724
Sobic.003G249000	K18693	DPP1, DPPL, PLPP4_5; diacylglycerol diphosphate phosphatase / phosphatidate phosphatase [EC:3.1.3.81 3.1.3.4]	A09100 Metabolism	B 09103 Lipid metabolism	C 00561 Glycerolipid metabolism [PATH:ko00561]	4.50442	7.09838e-11
Sobic.003G385900	K15718	LOX1_5; linoleate 9S-lipoxygenase [EC:1.13.11.58]	A09100 Metabolism	B 09103 Lipid metabolism	C 00591 Linoleic acid metabolism [PATH:ko00591]	3.26408	2.87783e-10
Sobic.003G183000	K25786	#N/A	#N/A	#N/A	#N/A	2.53084	1.05236e-05
Sobic.003G429300	K19784	chrR, NQR; chromate reductase, NAD(P)H dehydrogenase (quinone)	A09180 Brite Hierarchies	B 09191 Unclassified: metabolism	C 99988 Secondary metabolism	4.5352	1.46596e-06
Sobic.003G431800	K07562	NMD3; 60S ribosomal export protein NMD3	A09120 Genetic Information Processing	B 09122 Translation	C 03013 Nucleocytoplasmic transport [PATH:ko03013]	6.13564	0.0432527
Sobic.003G244100	K09060	GBF; plant G-box-binding factor	A09180 Brite Hierarchies	B 09182 Protein families: genetic information processing	C 03000 Transcription factors [BR:ko03000]	3.79764	3.98431e-09
Sobic.003G188200	K02575	NRT, narK, nrtP, nasA; MFS transporter, NNP family, nitrate/nitrite transporter	A09100 Metabolism	B 09102 Energy metabolism	C 00910 Nitrogen metabolism [PATH:ko00910]	2.51079	6.82904e-06
Sobic.003G140700	K00430	E1.11.1.7; peroxidase [EC:1.11.1.7]	A09100 Metabolism	B 09110 Biosynthesis of other secondary metabolites	C 00940 Phenylpropanoid biosynthesis [PATH:ko00940]	2.26593	3.2696e-05
Sobic.003G039400	K13993	HSP20; HSP20 family protein	A09120 Genetic Information Processing	B 09123 Folding, sorting and degradation	C 04141 Protein processing in endoplasmic reticulum [PATH:ko04141]	4.34978	1.42936e-12
Sobic.003G309700	K01593	DDC, TDC; aromatic-L-amino-acid/L-tryptophan decarboxylase [EC:4.1.1.28 4.1.1.105]	A09100 Metabolism	B 09105 Amino acid metabolism	C 00350 Tyrosine metabolism [PATH:ko00350]	2.2704	2.57341e-05
Sobic.003G036700	K00279	CKX; cytokinin dehydrogenase [EC:1.5.99.12]	A09100 Metabolism	B 09109 Metabolism of terpenoids and polyketides	C 00908 Zeatin biosynthesis [PATH:ko00908]	7.53779	0.000135471
Sobic.003G047700	K13496	UGT73C; UDP-glucosyltransferase 73C [EC:2.4.1.-]	A09100 Metabolism	B 09109 Metabolism of terpenoids and polyketides	C 00908 Zeatin biosynthesis [PATH:ko00908]	2.55871	3.67443e-07
Sobic.003G269300	K15382	SLC50A, SWEET; solute carrier family 50 (sugar transporter)	A09180 Brite Hierarchies	B 09183 Protein families: signaling and cellular processes	C 02000 Transporters [BR:ko02000]	2.19902	4.53664e-05
Sobic.003G279300	K13248	PHOSPHO2; pyridoxal phosphate phosphatase PHOSPHO2 [EC:3.1.3.74]	A09100 Metabolism	B 09108 Metabolism of cofactors and vitamins	C 00750 Vitamin B6 metabolism [PATH:ko00750]	2.31802	1.02153e-05
Sobic.003G268800	K20716	MAPKKK17_18; mitogen-activated protein kinase kinase kinase 17/18	A09130 Environmental Information Processing	B 09132 Signal transduction	C 04016 MAPK signaling pathway - plant [PATH:ko04016]	2.23936	0.0263808
Sobic.003G442601	K03123	TFIIA2, GTF2A2, TOA2; transcription initiation factor TFIIA small subunit	A09120 Genetic Information Processing	B 09121 Transcription	C 03022 Basal transcription factors [PATH:ko03022]	2.93841	1.93883e-05
Sobic.003G426400	K00799	GST, gst; glutathione S-transferase [EC:2.5.1.18]	A09100 Metabolism	B 09106 Metabolism of other amino acids	C 00480 Glutathione metabolism [PATH:ko00480]	2.31892	8.11744e-06
Sobic.009G242700	K13448	CML; calcium-binding protein CML	A09150 Organismal Systems	B 09159 Environmental adaptation	0	2.10298	0.0826346
Sobic.009G080400	K08237	E2.4.1.218; hydroquinone glucosyltransferase [EC:2.4.1.218]	A09180 Brite Hierarchies	B 09181 Protein families: metabolism	C 01003 Glycosyltransferases [BR:ko01003]	4.27155	4.47847e-07
Sobic.009G088800	K18482	ADCL; 4-amino-4-deoxychorismate lyase [EC:4.1.3.38]	A09100 Metabolism	B 09108 Metabolism of cofactors and vitamins	C 00790 Folate biosynthesis [PATH:ko00790]	2.16729	0.00791206
Sobic.009G169000	K01568	PDC, pdc; pyruvate decarboxylase [EC:4.1.1.1]	A09100 Metabolism	B 09101 Carbohydrate metabolism	C 00010 Glycolysis / Gluconeogenesis [PATH:ko00010]	9.35664	2.33806e-11
Sobic.009G144600	K00430	E1.11.1.7; peroxidase [EC:1.11.1.7]	A09100 Metabolism	B 09110 Biosynthesis of other secondary metabolites	C 00940 Phenylpropanoid biosynthesis [PATH:ko00940]	6.54554	0.0114578
Sobic.009G044400	K05933	E1.14.17.4; aminocyclopropanecarboxylate oxidase [EC:1.14.17.4]	A09100 Metabolism	B 09105 Amino acid metabolism	C 00270 Cysteine and methionine metabolism [PATH:ko00270]	3.10095	3.35408e-09
Sobic.009G245000	K00975	glgC; glucose-1-phosphate adenylyltransferase [EC:2.7.7.27]	A09100 Metabolism	B 09101 Carbohydrate metabolism	C 00500 Starch and sucrose metabolism [PATH:ko00500]	3.02674	8.94751e-10
Sobic.009G009300	K15803	GERD; (-)-germacrene D synthase [EC:4.2.3.75]	A09100 Metabolism	B 09109 Metabolism of terpenoids and polyketides	C 00909 Sesquiterpenoid and triterpenoid biosynthesis [PATH:ko00909]	3.85075	1.4438e-13
Sobic.009G130100	K20547	CHIB; basic endochitinase B [EC:3.2.1.14]	A09100 Metabolism	B 09101 Carbohydrate metabolism	C 00520 Amino sugar and nucleotide sugar metabolism [PATH:ko00520]	2.45205	2.23561e-05
Sobic.009G083600	K13448	CML; calcium-binding protein CML	A09150 Organismal Systems	B 09159 Environmental adaptation	0	6.65983	0.00737011
Sobic.009G043500	K00387	SUOX; sulfite oxidase [EC:1.8.3.1]	A09100 Metabolism	B 09102 Energy metabolism	C 00920 Sulfur metabolism [PATH:ko00920]	2.70685	0.00224892
Sobic.009G203700	K14484	IAA; auxin-responsive protein IAA	A09130 Environmental Information Processing	B 09132 Signal transduction	C 04075 Plant hormone signal transduction [PATH:ko04075]	2.89763	0.00724411
Sobic.009G071800	K00850	pfkA, PFK; 6-phosphofructokinase 1 [EC:2.7.1.11]	A09100 Metabolism	B 09101 Carbohydrate metabolism	C 00010 Glycolysis / Gluconeogenesis [PATH:ko00010]	4.01826	7.16307e-05
Sobic.009G035200	K19222	menI, DHNAT; 1,4-dihydroxy-2-naphthoyl-CoA hydrolase [EC:3.1.2.28]	A09100 Metabolism	B 09108 Metabolism of cofactors and vitamins	C 00130 Ubiquinone and other terpenoid-quinone biosynthesis [PATH:ko00130]	8.7034	1.93062e-08
Sobic.009G217500	K20716	MAPKKK17_18; mitogen-activated protein kinase kinase kinase 17/18	A09130 Environmental Information Processing	B 09132 Signal transduction	C 04016 MAPK signaling pathway - plant [PATH:ko04016]	7.59638	9.42251e-05
Sobic.009G118600	K03265	ETF1, ERF1; peptide chain release factor subunit 1	A09120 Genetic Information Processing	B 09122 Translation	C 03015 mRNA surveillance pathway [PATH:ko03015]	3.378	3.4963e-08
Sobic.009G043700	K00799	GST, gst; glutathione S-transferase [EC:2.5.1.18]	A09100 Metabolism	B 09106 Metabolism of other amino acids	C 00480 Glutathione metabolism [PATH:ko00480]	2.00951	0.000882539
Sobic.009G241000	K15397	KCS; 3-ketoacyl-CoA synthase [EC:2.3.1.199]	A09100 Metabolism	B 09103 Lipid metabolism	C 00062 Fatty acid elongation [PATH:ko00062]	5.96828	0.0671735
Sobic.005G018200	K14641	APY; apyrase [EC:3.6.1.5]	A09100 Metabolism	B 09104 Nucleotide metabolism	C 00230 Purine metabolism [PATH:ko00230]	3.85552	4.29632e-11
Sobic.005G055300	K08081	TR1; tropinone reductase I [EC:1.1.1.206]	A09100 Metabolism	B 09110 Biosynthesis of other secondary metabolites	C 00960 Tropane, piperidine and pyridine alkaloid biosynthesis [PATH:ko00960]	4.6828	5.30131e-11
Sobic.005G137200	K00660	CHS; chalcone synthase [EC:2.3.1.74]	A09100 Metabolism	B 09110 Biosynthesis of other secondary metabolites	C 00941 Flavonoid biosynthesis [PATH:ko00941]	6.54554	0.0114578
Sobic.005G193600	K15397	KCS; 3-ketoacyl-CoA synthase [EC:2.3.1.199]	A09100 Metabolism	B 09103 Lipid metabolism	C 00062 Fatty acid elongation [PATH:ko00062]	7.59638	9.42251e-05
Sobic.005G025400	K13412	CPK; calcium-dependent protein kinase [EC:2.7.11.1]	A09150 Organismal Systems	B 09159 Environmental adaptation	0	2.12448	0.0432143
Sobic.005G037000	K20624	CYP94C1; 12-hydroxyjasmonoyl-L-amino acid 12-hydroxylase / fatty acid hydroxylase [EC:1.14.14.49]	A09180 Brite Hierarchies	B 09181 Protein families: metabolism	C 00199 Cytochrome P450 [BR:ko00199]	7.70686	4.53664e-05
Sobic.005G200300	K00815	TAT; tyrosine aminotransferase [EC:2.6.1.5]	A09100 Metabolism	B 09105 Amino acid metabolism	C 00270 Cysteine and methionine metabolism [PATH:ko00270]	3.86483	1.57701e-05
Sobic.005G099500	K14641	APY; apyrase [EC:3.6.1.5]	A09100 Metabolism	B 09104 Nucleotide metabolism	C 00230 Purine metabolism [PATH:ko00230]	5.17014	1.55535e-18
Sobic.005G033801	K22772	FG2; flavonol-3-O-glucoside L-rhamnosyltransferase [EC:2.4.1.159]	A09100 Metabolism	B 09110 Biosynthesis of other secondary metabolites	C 00944 Flavone and flavonol biosynthesis [PATH:ko00944]	9.077	4.26237e-10
Sobic.005G191500	K10523	SPOP; speckle-type POZ protein	A09130 Environmental Information Processing	B 09132 Signal transduction	C 04340 Hedgehog signaling pathway [PATH:ko04340]	2.65925	0.00747975
Sobic.005G136300	K00660	CHS; chalcone synthase [EC:2.3.1.74]	A09100 Metabolism	B 09110 Biosynthesis of other secondary metabolites	C 00941 Flavonoid biosynthesis [PATH:ko00941]	4.18011	1.03005e-06
Sobic.005G088400	K09755	CYP84A, F5H; ferulate-5-hydroxylase [EC:1.14.-.-]	A09100 Metabolism	B 09110 Biosynthesis of other secondary metabolites	C 00940 Phenylpropanoid biosynthesis [PATH:ko00940]	8.03801	4.30825e-06
Sobic.005G030500	K14492	ARR-A; two-component response regulator ARR-A family	A09130 Environmental Information Processing	B 09132 Signal transduction	C 04075 Plant hormone signal transduction [PATH:ko04075]	2.50607	6.1542e-07
Sobic.005G206500	K03452	MHX; magnesium/proton exchanger	A09180 Brite Hierarchies	B 09183 Protein families: signaling and cellular processes	C 02000 Transporters [BR:ko02000]	2.81801	5.53596e-08
Sobic.005G087800	K17506	PPM1L, PP2CE; protein phosphatase 1L [EC:3.1.3.16]	A09180 Brite Hierarchies	B 09181 Protein families: metabolism	C 01009 Protein phosphatases and associated proteins [BR:ko01009]	6.13564	0.0432527
Sobic.005G212700	K00799	GST, gst; glutathione S-transferase [EC:2.5.1.18]	A09100 Metabolism	B 09106 Metabolism of other amino acids	C 00480 Glutathione metabolism [PATH:ko00480]	4.58866	0.00017133
Sobic.005G082600	K19825	DBR; 2-alkenal reductase (NADP+) [EC:1.3.1.102]	A09180 Brite Hierarchies	B 09191 Unclassified: metabolism	C 99980 Enzymes with EC numbers	2.22894	1.09695e-05
Sobic.005G123500	K15382	SLC50A, SWEET; solute carrier family 50 (sugar transporter)	A09180 Brite Hierarchies	B 09183 Protein families: signaling and cellular processes	C 02000 Transporters [BR:ko02000]	2.03507	0.000905381
Sobic.005G137000	K00660	CHS; chalcone synthase [EC:2.3.1.74]	A09100 Metabolism	B 09110 Biosynthesis of other secondary metabolites	C 00941 Flavonoid biosynthesis [PATH:ko00941]	7.04349	0.0020832
Sobic.005G192100	K13457	RPM1, RPS3; disease resistance protein RPM1	A09150 Organismal Systems	B 09159 Environmental adaptation	0	3.90452	0.007563
Sobic.005G036500	K08286	E2.7.11.-; protein-serine/threonine kinase [EC:2.7.11.-]	A09180 Brite Hierarchies	B 09191 Unclassified: metabolism	C 99980 Enzymes with EC numbers	2.5935	1.31793e-06
Sobic.005G186500	K16297	SCPL-II; serine carboxypeptidase-like clade II [EC:3.4.16.-]	A09180 Brite Hierarchies	B 09181 Protein families: metabolism	C 01002 Peptidases and inhibitors [BR:ko01002]	5.55274	3.06694e-22
Sobic.005G190800	K05928	E2.1.1.95; tocopherol O-methyltransferase [EC:2.1.1.95]	A09100 Metabolism	B 09108 Metabolism of cofactors and vitamins	C 00130 Ubiquinone and other terpenoid-quinone biosynthesis [PATH:ko00130]	3.81881	6.2148e-12
Sobic.005G015600	K24544	CYP714C; cytochrome P450 family 714 subfamily C	A09180 Brite Hierarchies	B 09181 Protein families: metabolism	C 00199 Cytochrome P450 [BR:ko00199]	2.99541	0.00034753
Sobic.005G114000	K05389	KCNKF; potassium channel subfamily K, other eukaryote	A09180 Brite Hierarchies	B 09183 Protein families: signaling and cellular processes	C 04040 Ion channels [BR:ko04040]	2.56875	0.000188813
Sobic.008G088803	K12183	TSG101, STP22, VPS23; ESCRT-I complex subunit TSG101	A09140 Cellular Processes	B 09141 Transport and catabolism	C 04144 Endocytosis [PATH:ko04144]	2.89385	0.000691497
Sobic.008G064700	K14190	VTC2_5; GDP-L-galactose phosphorylase [EC:2.7.7.69]	A09100 Metabolism	B 09101 Carbohydrate metabolism	C 00053 Ascorbate and aldarate metabolism [PATH:ko00053]	3.32637	1.25716e-11
Sobic.008G189500	K22390	ACP7; acid phosphatase type 7	A09180 Brite Hierarchies	B 09191 Unclassified: metabolism	C 99999 Others	3.61396	2.66415e-13
Sobic.008G036000	K20624	CYP94C1; 12-hydroxyjasmonoyl-L-amino acid 12-hydroxylase / fatty acid hydroxylase [EC:1.14.14.49]	A09180 Brite Hierarchies	B 09181 Protein families: metabolism	C 00199 Cytochrome P450 [BR:ko00199]	8.97029	1.32594e-09
Sobic.008G059000	K24917	AAP; amino acid permease	A09180 Brite Hierarchies	B 09183 Protein families: signaling and cellular processes	C 02000 Transporters [BR:ko02000]	2.3708	1.11554e-05
Sobic.008G049000	K22848	DGAT2; diacylglycerol O-acyltransferase 2, plant [EC:2.3.1.20]	A09100 Metabolism	B 09103 Lipid metabolism	C 00561 Glycerolipid metabolism [PATH:ko00561]	5.77892	0.104703
Sobic.008G053500	K03453	TC.BASS; bile acid:Na+ symporter, BASS family	A09180 Brite Hierarchies	B 09193 Unclassified: signaling and cellular processes	C 99977 Transport	2.61764	0.000392197
Sobic.008G066000	K08818	CDC2L; cell division cycle 2-like [EC:2.7.11.22]	A09180 Brite Hierarchies	B 09181 Protein families: metabolism	C 01001 Protein kinases [BR:ko01001]	2.67112	0.00125865
Sobic.008G171600	K03327	TC.MATE, SLC47A, norM, mdtK, dinF; multidrug resistance protein, MATE family	A09180 Brite Hierarchies	B 09183 Protein families: signaling and cellular processes	C 02000 Transporters [BR:ko02000]	8.27165	6.62881e-07
Sobic.008G015600	K13412	CPK; calcium-dependent protein kinase [EC:2.7.11.1]	A09150 Organismal Systems	B 09159 Environmental adaptation	0	5.63424	4.78231e-08
Sobic.008G055700	K09422	MYBP; transcription factor MYB, plant	A09180 Brite Hierarchies	B 09182 Protein families: genetic information processing	C 03000 Transcription factors [BR:ko03000]	6.13564	0.0432527
Sobic.008G019400	K03327	TC.MATE, SLC47A, norM, mdtK, dinF; multidrug resistance protein, MATE family	A09180 Brite Hierarchies	B 09183 Protein families: signaling and cellular processes	C 02000 Transporters [BR:ko02000]	2.51696	7.2766e-07
Sobic.008G136500	K20623	CYP92A6; typhasterol/6-deoxotyphasterol 2alpha-hydroxylase	A09100 Metabolism	B 09109 Metabolism of terpenoids and polyketides	C 00905 Brassinosteroid biosynthesis [PATH:ko00905]	5.83464	3.78868e-16
Sobic.008G159100	K13448	CML; calcium-binding protein CML	A09150 Organismal Systems	B 09159 Environmental adaptation	0	2.38493	0.00204804
Sobic.008G186500	K00854	xylB, XYLB; xylulokinase [EC:2.7.1.17]	A09100 Metabolism	B 09101 Carbohydrate metabolism	C 00040 Pentose and glucuronate interconversions [PATH:ko00040]	2.85106	0.00261676
Sobic.004G085600	K16241	HY5; transcription factor HY5	A09150 Organismal Systems	B 09159 Environmental adaptation	0	3.27025	1.14616e-10
Sobic.004G145701	K02978	RP-S27e, RPS27; small subunit ribosomal protein S27e	A09120 Genetic Information Processing	B 09122 Translation	C 03010 Ribosome [PATH:ko03010]	6.54554	0.0114578
Sobic.004G105800	K00430	E1.11.1.7; peroxidase [EC:1.11.1.7]	A09100 Metabolism	B 09110 Biosynthesis of other secondary metabolites	C 00940 Phenylpropanoid biosynthesis [PATH:ko00940]	2.84161	3.13431e-06
Sobic.004G220700	K10775	PAL; phenylalanine ammonia-lyase [EC:4.3.1.24]	A09100 Metabolism	B 09105 Amino acid metabolism	C 00360 Phenylalanine metabolism [PATH:ko00360]	5.86736	2.42771e-24
Sobic.004G156300	K14488	SAUR; SAUR family protein	A09130 Environmental Information Processing	B 09132 Signal transduction	C 04075 Plant hormone signal transduction [PATH:ko04075]	6.28559	0.027685
Sobic.004G064400	K22314	GGP; glucosinolate gamma-glutamyl hydrolase [EC:3.4.19.16]	A09180 Brite Hierarchies	B 09191 Unclassified: metabolism	C 99980 Enzymes with EC numbers	2.57461	1.81389e-06
Sobic.004G265000	K00122	FDH; formate dehydrogenase [EC:1.17.1.9]	A09100 Metabolism	B 09101 Carbohydrate metabolism	C 00630 Glyoxylate and dicarboxylate metabolism [PATH:ko00630]	2.75505	6.83898e-07
Sobic.004G011201	K10143	RFWD2, COP1; E3 ubiquitin-protein ligase RFWD2 [EC:2.3.2.27]	A09120 Genetic Information Processing	B 09123 Folding, sorting and degradation	C 04120 Ubiquitin mediated proteolysis [PATH:ko04120]	3.08144	1.69578e-09
Sobic.004G141100	K00913	ITPK1; inositol-1,3,4-trisphosphate 5/6-kinase / inositol-tetrakisphosphate 1-kinase [EC:2.7.1.159 2.7.1.134]	A09100 Metabolism	B 09101 Carbohydrate metabolism	C 00562 Inositol phosphate metabolism [PATH:ko00562]	2.63074	0.000168019
Sobic.004G236000	K05909	E1.10.3.2; laccase [EC:1.10.3.2]	A09180 Brite Hierarchies	B 09191 Unclassified: metabolism	C 99980 Enzymes with EC numbers	6.13564	0.0432527
Sobic.004G053700	K00457	HPD, hppD; 4-hydroxyphenylpyruvate dioxygenase [EC:1.13.11.27]	A09100 Metabolism	B 09105 Amino acid metabolism	C 00350 Tyrosine metabolism [PATH:ko00350]	2.42258	9.97023e-07
Sobic.004G329700	K18999	CPL3_4; RNA polymerase II C-terminal domain phosphatase-like 3/4 [EC:3.1.3.16]	A09180 Brite Hierarchies	B 09181 Protein families: metabolism	C 01009 Protein phosphatases and associated proteins [BR:ko01009]	2.55285	0.0129194
Sobic.004G312800	K18045	SIW14, OCA3; tyrosine-protein phosphatase SIW14 [EC:3.1.3.48]	A09180 Brite Hierarchies	B 09181 Protein families: metabolism	C 01009 Protein phosphatases and associated proteins [BR:ko01009]	2.48175	1.75679e-06
Sobic.004G279200	K01102	PDP; pyruvate dehydrogenase phosphatase [EC:3.1.3.43]	A09180 Brite Hierarchies	B 09181 Protein families: metabolism	C 01009 Protein phosphatases and associated proteins [BR:ko01009]	2.34673	0.00104411
Sobic.004G053400	K14488	SAUR; SAUR family protein	A09130 Environmental Information Processing	B 09132 Signal transduction	C 04075 Plant hormone signal transduction [PATH:ko04075]	2.66683	8.03536e-07
Sobic.004G064500	K22314	GGP; glucosinolate gamma-glutamyl hydrolase [EC:3.4.19.16]	A09180 Brite Hierarchies	B 09191 Unclassified: metabolism	C 99980 Enzymes with EC numbers	7.47673	0.000194432
Sobic.004G224766	K16297	SCPL-II; serine carboxypeptidase-like clade II [EC:3.4.16.-]	A09180 Brite Hierarchies	B 09181 Protein families: metabolism	C 01002 Peptidases and inhibitors [BR:ko01002]	2.0647	0.000121673
Sobic.004G182300	K08472	MLO; mlo protein	A09180 Brite Hierarchies	B 09183 Protein families: signaling and cellular processes	C 04030 G protein-coupled receptors [BR:ko04030]	3.60892	8.57871e-10
Sobic.004G312500	K10534	NR; nitrate reductase (NAD(P)H) [EC:1.7.1.1 1.7.1.2 1.7.1.3]	A09100 Metabolism	B 09102 Energy metabolism	C 00910 Nitrogen metabolism [PATH:ko00910]	2.34681	0.000583106
Sobic.004G332600	K10268	FBXL2_20; F-box and leucine-rich repeat protein 2/20	A09180 Brite Hierarchies	B 09182 Protein families: genetic information processing	C 04121 Ubiquitin system [BR:ko04121]	2.81541	0.046094
Sobic.004G067300	K12399	AP3S; AP-3 complex subunit sigma	A09140 Cellular Processes	B 09141 Transport and catabolism	C 04142 Lysosome [PATH:ko04142]	5.77892	0.104703
Sobic.004G192800	K17080	PHB1; prohibitin 1	A09180 Brite Hierarchies	B 09182 Protein families: genetic information processing	C 03029 Mitochondrial biogenesis [BR:ko03029]	2.00736	0.000338991
Sobic.004G144150	K13356	FAR; alcohol-forming fatty acyl-CoA reductase [EC:1.2.1.84]	A09100 Metabolism	B 09103 Lipid metabolism	C 00073 Cutin, suberine and wax biosynthesis [PATH:ko00073]	2.85491	6.91688e-05
Sobic.004G101400	K09419	HSFF; heat shock transcription factor, other eukaryote	A09180 Brite Hierarchies	B 09182 Protein families: genetic information processing	C 03000 Transcription factors [BR:ko03000]	8.59264	5.31652e-08
Sobic.004G086400	K15639	CYP734A1, BAS1; PHYB activation tagged suppressor 1 [EC:1.14.-.-]	A09100 Metabolism	B 09109 Metabolism of terpenoids and polyketides	C 00905 Brassinosteroid biosynthesis [PATH:ko00905]	5.96828	0.0671735
Sobic.004G097300	K13248	PHOSPHO2; pyridoxal phosphate phosphatase PHOSPHO2 [EC:3.1.3.74]	A09100 Metabolism	B 09108 Metabolism of cofactors and vitamins	C 00750 Vitamin B6 metabolism [PATH:ko00750]	4.91611	8.38442e-16
Sobic.004G130600	K06268	PPP3R, CNB; serine/threonine-protein phosphatase 2B regulatory subunit	A09130 Environmental Information Processing	B 09132 Signal transduction	C 04010 MAPK signaling pathway [PATH:ko04010]	2.87859	5.35658e-06
Sobic.004G176900	K04421	MAP3K3, MEKK3; mitogen-activated protein kinase kinase kinase 3 [EC:2.7.11.25]	A09130 Environmental Information Processing	B 09132 Signal transduction	C 04010 MAPK signaling pathway [PATH:ko04010]	2.64487	0.000916962
Sobic.004G095600	K13457	RPM1, RPS3; disease resistance protein RPM1	A09150 Organismal Systems	B 09159 Environmental adaptation	0	2.95772	4.3125e-07
Sobic.004G220600	K10775	PAL; phenylalanine ammonia-lyase [EC:4.3.1.24]	A09100 Metabolism	B 09105 Amino acid metabolism	C 00360 Phenylalanine metabolism [PATH:ko00360]	6.13564	0.0432527
Sobic.004G310100	K05278	FLS; flavonol synthase [EC:1.14.20.6]	A09100 Metabolism	B 09110 Biosynthesis of other secondary metabolites	C 00941 Flavonoid biosynthesis [PATH:ko00941]	3.0452	4.98222e-06
Sobic.004G185100	K03809	wrbA; NAD(P)H dehydrogenase (quinone) [EC:1.6.5.2]	A09100 Metabolism	B 09108 Metabolism of cofactors and vitamins	C 00130 Ubiquinone and other terpenoid-quinone biosynthesis [PATH:ko00130]	7.85817	1.58908e-05
Sobic.007G077001	K09286	EREBP; EREBP-like factor	A09180 Brite Hierarchies	B 09182 Protein families: genetic information processing	C 03000 Transcription factors [BR:ko03000]	2.56455	0.00242723
Sobic.007G044900	K20623	CYP92A6; typhasterol/6-deoxotyphasterol 2alpha-hydroxylase	A09100 Metabolism	B 09109 Metabolism of terpenoids and polyketides	C 00905 Brassinosteroid biosynthesis [PATH:ko00905]	2.80198	0.000649243
Sobic.007G194100	K22390	ACP7; acid phosphatase type 7	A09180 Brite Hierarchies	B 09191 Unclassified: metabolism	C 99999 Others	3.64297	2.33731e-06
Sobic.007G194800	K01052	LIPA; lysosomal acid lipase/cholesteryl ester hydrolase [EC:3.1.1.13]	A09100 Metabolism	B 09103 Lipid metabolism	C 00100 Steroid biosynthesis [PATH:ko00100]	2.19757	0.00470371
Sobic.007G152300	K09338	HD-ZIP; homeobox-leucine zipper protein	A09180 Brite Hierarchies	B 09182 Protein families: genetic information processing	C 03000 Transcription factors [BR:ko03000]	2.70685	0.00224892
Sobic.007G043100	K01853	CAS1; cycloartenol synthase [EC:5.4.99.8]	A09100 Metabolism	B 09103 Lipid metabolism	C 00100 Steroid biosynthesis [PATH:ko00100]	2.29902	2.34212e-05
Sobic.007G011700	K17108	GBA2; non-lysosomal glucosylceramidase [EC:3.2.1.45]	A09100 Metabolism	B 09103 Lipid metabolism	C 00600 Sphingolipid metabolism [PATH:ko00600]	2.19467	0.000240585
Sobic.007G090472	K01853	CAS1; cycloartenol synthase [EC:5.4.99.8]	A09100 Metabolism	B 09103 Lipid metabolism	C 00100 Steroid biosynthesis [PATH:ko00100]	6.86437	0.00316426
Sobic.007G168000	K08099	E3.1.1.14; chlorophyllase [EC:3.1.1.14]	A09100 Metabolism	B 09108 Metabolism of cofactors and vitamins	C 00860 Porphyrin and chlorophyll metabolism [PATH:ko00860]	4.47803	6.31384e-17
Sobic.007G209900	K03549	kup; KUP system potassium uptake protein	A09180 Brite Hierarchies	B 09183 Protein families: signaling and cellular processes	C 02000 Transporters [BR:ko02000]	2.63646	0.00156858
Sobic.007G154800	K01674	cah; carbonic anhydrase [EC:4.2.1.1]	A09100 Metabolism	B 09102 Energy metabolism	C 00910 Nitrogen metabolism [PATH:ko00910]	2.75139	4.75712e-08
Sobic.007G153900	K10534	NR; nitrate reductase (NAD(P)H) [EC:1.7.1.1 1.7.1.2 1.7.1.3]	A09100 Metabolism	B 09102 Energy metabolism	C 00910 Nitrogen metabolism [PATH:ko00910]	2.01883	4.2388e-05
Sobic.007G201100	K22285	OSBPL8, ORP8; oxysterol-binding protein-related protein 8	A09180 Brite Hierarchies	B 09182 Protein families: genetic information processing	C 04131 Membrane trafficking [BR:ko04131]	3.16943	2.59938e-06
Sobic.007G170800	K13356	FAR; alcohol-forming fatty acyl-CoA reductase [EC:1.2.1.84]	A09100 Metabolism	B 09103 Lipid metabolism	C 00073 Cutin, suberine and wax biosynthesis [PATH:ko00073]	6.03211	4.23336e-26
Sobic.007G210801	K24444	JMJ30; [histone H3]-dimethyl/trimethyl-L-lysine36 demethylase [EC:1.14.11.27 1.14.11.-]	A09180 Brite Hierarchies	B 09182 Protein families: genetic information processing	C 03036 Chromosome and associated proteins [BR:ko03036]	2.1601	1.87457e-05
Sobic.007G068300	K00422	E1.10.3.1; polyphenol oxidase [EC:1.10.3.1]	A09100 Metabolism	B 09105 Amino acid metabolism	C 00350 Tyrosine metabolism [PATH:ko00350]	4.15605	2.38254e-16
Sobic.007G077100	K09286	EREBP; EREBP-like factor	A09180 Brite Hierarchies	B 09182 Protein families: genetic information processing	C 03000 Transcription factors [BR:ko03000]	7.53779	0.000135471
Sobic.007G160700	K03327	TC.MATE, SLC47A, norM, mdtK, dinF; multidrug resistance protein, MATE family	A09180 Brite Hierarchies	B 09183 Protein families: signaling and cellular processes	C 02000 Transporters [BR:ko02000]	2.72153	3.0883e-08
Sobic.007G037800	K10523	SPOP; speckle-type POZ protein	A09130 Environmental Information Processing	B 09132 Signal transduction	C 04340 Hedgehog signaling pathway [PATH:ko04340]	7.65267	6.53954e-05
Sobic.007G142200	K13065	E2.3.1.133, HCT; shikimate O-hydroxycinnamoyltransferase [EC:2.3.1.133]	A09100 Metabolism	B 09110 Biosynthesis of other secondary metabolites	C 00940 Phenylpropanoid biosynthesis [PATH:ko00940]	2.13331	1.87909e-05
Sobic.007G056400	K02149	ATPeV1D, ATP6M; V-type H+-transporting ATPase subunit D	A09100 Metabolism	B 09102 Energy metabolism	C 00190 Oxidative phosphorylation [PATH:ko00190]	2.16563	0.0995453
Sobic.007G035000	K01593	DDC, TDC; aromatic-L-amino-acid/L-tryptophan decarboxylase [EC:4.1.1.28 4.1.1.105]	A09100 Metabolism	B 09105 Amino acid metabolism	C 00350 Tyrosine metabolism [PATH:ko00350]	6.13564	0.0432527
Sobic.007G068700	K00422	E1.10.3.1; polyphenol oxidase [EC:1.10.3.1]	A09100 Metabolism	B 09105 Amino acid metabolism	C 00350 Tyrosine metabolism [PATH:ko00350]	9.01393	8.37709e-10
Sobic.007G058800	K13066	COMT; caffeic acid 3-O-methyltransferase / acetylserotonin O-methyltransferase [EC:2.1.1.68 2.1.1.4]	A09100 Metabolism	B 09105 Amino acid metabolism	C 00380 Tryptophan metabolism [PATH:ko00380]	4.13457	4.03549e-10
Sobic.007G059100	K13066	COMT; caffeic acid 3-O-methyltransferase / acetylserotonin O-methyltransferase [EC:2.1.1.68 2.1.1.4]	A09100 Metabolism	B 09105 Amino acid metabolism	C 00380 Tryptophan metabolism [PATH:ko00380]	7.70686	4.53664e-05
Sobic.007G034700	K15803	GERD; (-)-germacrene D synthase [EC:4.2.3.75]	A09100 Metabolism	B 09109 Metabolism of terpenoids and polyketides	C 00909 Sesquiterpenoid and triterpenoid biosynthesis [PATH:ko00909]	2.72762	0.000264523
Sobic.007G141500	K01850	E5.4.99.5; chorismate mutase [EC:5.4.99.5]	A09100 Metabolism	B 09105 Amino acid metabolism	C 00400 Phenylalanine, tyrosine and tryptophan biosynthesis [PATH:ko00400]	2.62476	0.000569566
Sobic.007G204600	K01214	ISA, treX; isoamylase [EC:3.2.1.68]	A09100 Metabolism	B 09101 Carbohydrate metabolism	C 00500 Starch and sucrose metabolism [PATH:ko00500]	2.01372	0.000194926
Sobic.007G190200	K22390	ACP7; acid phosphatase type 7	A09180 Brite Hierarchies	B 09191 Unclassified: metabolism	C 99999 Others	3.30278	2.22463e-11
Sobic.007G170400	K00660	CHS; chalcone synthase [EC:2.3.1.74]	A09100 Metabolism	B 09110 Biosynthesis of other secondary metabolites	C 00941 Flavonoid biosynthesis [PATH:ko00941]	2.38449	2.47755e-06
Sobic.007G058900	K00660	CHS; chalcone synthase [EC:2.3.1.74]	A09100 Metabolism	B 09110 Biosynthesis of other secondary metabolites	C 00941 Flavonoid biosynthesis [PATH:ko00941]	5.77892	0.104703
Sobic.001G481300	K09286	EREBP; EREBP-like factor	A09180 Brite Hierarchies	B 09182 Protein families: genetic information processing	C 03000 Transcription factors [BR:ko03000]	6.65983	0.00737011
Sobic.001G056400	K01695	trpA; tryptophan synthase alpha chain [EC:4.2.1.20]	A09100 Metabolism	B 09105 Amino acid metabolism	C 00260 Glycine, serine and threonine metabolism [PATH:ko00260]	8.23524	8.98619e-07
Sobic.001G482800	K13464	JAZ; jasmonate ZIM domain-containing protein	A09130 Environmental Information Processing	B 09132 Signal transduction	C 04075 Plant hormone signal transduction [PATH:ko04075]	6.65983	0.00737011
Sobic.001G243300	K08099	E3.1.1.14; chlorophyllase [EC:3.1.1.14]	A09100 Metabolism	B 09108 Metabolism of cofactors and vitamins	C 00860 Porphyrin and chlorophyll metabolism [PATH:ko00860]	2.43558	1.4386e-06
Sobic.001G496300	K08967	mtnD, mtnZ, ADI1; 1,2-dihydroxy-3-keto-5-methylthiopentene dioxygenase [EC:1.13.11.53 1.13.11.54]	A09100 Metabolism	B 09105 Amino acid metabolism	C 00270 Cysteine and methionine metabolism [PATH:ko00270]	2.18635	3.61688e-05
Sobic.001G118700	K00794	ribH, RIB4; 6,7-dimethyl-8-ribityllumazine synthase [EC:2.5.1.78]	A09100 Metabolism	B 09108 Metabolism of cofactors and vitamins	C 00740 Riboflavin metabolism [PATH:ko00740]	2.08092	0.0133945
Sobic.001G470600	K17470	SULTR1; sulfate transporter 1, high-affinity	A09180 Brite Hierarchies	B 09183 Protein families: signaling and cellular processes	C 02000 Transporters [BR:ko02000]	2.22744	8.83978e-06
Sobic.001G259600	K13464	JAZ; jasmonate ZIM domain-containing protein	A09130 Environmental Information Processing	B 09132 Signal transduction	C 04075 Plant hormone signal transduction [PATH:ko04075]	7.59638	9.42251e-05
Sobic.001G318700	K00799	GST, gst; glutathione S-transferase [EC:2.5.1.18]	A09100 Metabolism	B 09106 Metabolism of other amino acids	C 00480 Glutathione metabolism [PATH:ko00480]	7.65267	6.53954e-05
Sobic.001G449100	K20858	MCU; calcium uniporter protein, mitochondrial	A09130 Environmental Information Processing	B 09132 Signal transduction	C 04020 Calcium signaling pathway [PATH:ko04020]	6.65983	0.00737011
Sobic.001G443800	K01580	E4.1.1.15, gadB, gadA, GAD; glutamate decarboxylase [EC:4.1.1.15]	A09100 Metabolism	B 09101 Carbohydrate metabolism	C 00650 Butanoate metabolism [PATH:ko00650]	2.6632	0.000197238
Sobic.001G447500	K00826	E2.6.1.42, ilvE; branched-chain amino acid aminotransferase [EC:2.6.1.42]	A09100 Metabolism	B 09105 Amino acid metabolism	C 00270 Cysteine and methionine metabolism [PATH:ko00270]	2.08375	5.43902e-05
Sobic.001G526900	K24028	DMR6, DLO; salicylic acid 3-hydroxylase [EC:1.14.11.-]	A09180 Brite Hierarchies	B 09191 Unclassified: metabolism	C 99980 Enzymes with EC numbers	2.56115	1.29282e-06
Sobic.001G231600	K00059	fabG, OAR1; 3-oxoacyl-[acyl-carrier protein] reductase [EC:1.1.1.100]	A09100 Metabolism	B 09103 Lipid metabolism	C 00061 Fatty acid biosynthesis [PATH:ko00061]	5.77892	0.104703
Sobic.001G195300	K24184	CYP89A; cytochrome P450 family 89 subfamily A [EC:1.14.-.-]	A09180 Brite Hierarchies	B 09181 Protein families: metabolism	C 00199 Cytochrome P450 [BR:ko00199]	2.69266	4.25377e-07
Sobic.001G137900	K24184	CYP89A; cytochrome P450 family 89 subfamily A [EC:1.14.-.-]	A09180 Brite Hierarchies	B 09181 Protein families: metabolism	C 00199 Cytochrome P450 [BR:ko00199]	8.53391	9.28821e-08
Sobic.001G397900	K09422	MYBP; transcription factor MYB, plant	A09180 Brite Hierarchies	B 09182 Protein families: genetic information processing	C 03000 Transcription factors [BR:ko03000]	4.37556	0.000647892
Sobic.001G474200	K07893	RAB6A; Ras-related protein Rab-6A	A09180 Brite Hierarchies	B 09182 Protein families: genetic information processing	C 04131 Membrane trafficking [BR:ko04131]	4.48604	0.000332125
Sobic.001G104900	K25380	EGY; zinc metalloprotease EGY, chloroplastic [EC:3.4.24.-]	A09180 Brite Hierarchies	B 09181 Protein families: metabolism	C 01002 Peptidases and inhibitors [BR:ko01002]	6.48085	6.85077e-12
Sobic.001G507500	K04077	groEL, HSPD1; chaperonin GroEL	A09120 Genetic Information Processing	B 09123 Folding, sorting and degradation	C 03018 RNA degradation [PATH:ko03018]	2.23274	0.000563271
Sobic.001G319500	K00799	GST, gst; glutathione S-transferase [EC:2.5.1.18]	A09100 Metabolism	B 09106 Metabolism of other amino acids	C 00480 Glutathione metabolism [PATH:ko00480]	3.00467	1.42865e-08
Sobic.001G318200	K00799	GST, gst; glutathione S-transferase [EC:2.5.1.18]	A09100 Metabolism	B 09106 Metabolism of other amino acids	C 00480 Glutathione metabolism [PATH:ko00480]	4.78747	2.88982e-09
Sobic.001G208800	K02977	RP-S27Ae, RPS27A, UBA80; ubiquitin-small subunit ribosomal protein S27Ae	A09120 Genetic Information Processing	B 09122 Translation	C 03010 Ribosome [PATH:ko03010]	6.65983	0.00737011
Sobic.001G438000	K13993	HSP20; HSP20 family protein	A09120 Genetic Information Processing	B 09123 Folding, sorting and degradation	C 04141 Protein processing in endoplasmic reticulum [PATH:ko04141]	3.98198	0.00530842
Sobic.001G482600	K13464	JAZ; jasmonate ZIM domain-containing protein	A09130 Environmental Information Processing	B 09132 Signal transduction	C 04075 Plant hormone signal transduction [PATH:ko04075]	3.78767	2.62152e-13
Sobic.001G473900	K09286	EREBP; EREBP-like factor	A09180 Brite Hierarchies	B 09182 Protein families: genetic information processing	C 03000 Transcription factors [BR:ko03000]	7.34626	0.000423737
Sobic.001G125900	K15718	LOX1_5; linoleate 9S-lipoxygenase [EC:1.13.11.58]	A09100 Metabolism	B 09103 Lipid metabolism	C 00591 Linoleic acid metabolism [PATH:ko00591]	3.95624	2.64167e-15
Sobic.001G185800	K03327	TC.MATE, SLC47A, norM, mdtK, dinF; multidrug resistance protein, MATE family	A09180 Brite Hierarchies	B 09183 Protein families: signaling and cellular processes	C 02000 Transporters [BR:ko02000]	2.19064	0.0114578
Sobic.001G255300	K01593	DDC, TDC; aromatic-L-amino-acid/L-tryptophan decarboxylase [EC:4.1.1.28 4.1.1.105]	A09100 Metabolism	B 09105 Amino acid metabolism	C 00350 Tyrosine metabolism [PATH:ko00350]	3.89208	4.41468e-12
Sobic.001G510200	K10251	HSD17B12, KAR, IFA38; 17beta-estradiol 17-dehydrogenase / very-long-chain 3-oxoacyl-CoA reductase [EC:1.1.1.62 1.1.1.330]	A09100 Metabolism	B 09103 Lipid metabolism	C 00062 Fatty acid elongation [PATH:ko00062]	6.42141	0.0177562
Sobic.001G384100	K15633	gpmI; 2,3-bisphosphoglycerate-independent phosphoglycerate mutase [EC:5.4.2.12]	A09100 Metabolism	B 09101 Carbohydrate metabolism	C 00010 Glycolysis / Gluconeogenesis [PATH:ko00010]	3.28732	6.57839e-06
Sobic.001G393500	K02183	CALM; calmodulin	A09130 Environmental Information Processing	B 09132 Signal transduction	C 04016 MAPK signaling pathway - plant [PATH:ko04016]	4.42684	3.00793e-17
Sobic.001G318500	K00799	GST, gst; glutathione S-transferase [EC:2.5.1.18]	A09100 Metabolism	B 09106 Metabolism of other amino acids	C 00480 Glutathione metabolism [PATH:ko00480]	2.82193	0.00110958
Sobic.001G027300	K18551	SDT1; pyrimidine and pyridine-specific 5'-nucleotidase [EC:3.1.3.-]	A09100 Metabolism	B 09108 Metabolism of cofactors and vitamins	C 00760 Nicotinate and nicotinamide metabolism [PATH:ko00760]	3.66818	0.000735555
Sobic.001G306600	K13545	RCCR, ACD2; red chlorophyll catabolite reductase [EC:1.3.7.12]	A09100 Metabolism	B 09108 Metabolism of cofactors and vitamins	C 00860 Porphyrin and chlorophyll metabolism [PATH:ko00860]	3.27241	9.29982e-07
Sobic.001G471100	K10206	E2.6.1.83; LL-diaminopimelate aminotransferase [EC:2.6.1.83]	A09100 Metabolism	B 09105 Amino acid metabolism	C 00300 Lysine biosynthesis [PATH:ko00300]	10.7468	9.07742e-19
Sobic.001G116400	K01915	glnA, GLUL; glutamine synthetase [EC:6.3.1.2]	A09100 Metabolism	B 09101 Carbohydrate metabolism	C 00630 Glyoxylate and dicarboxylate metabolism [PATH:ko00630]	2.90861	3.9469e-09
Sobic.001G056500	K01695	trpA; tryptophan synthase alpha chain [EC:4.2.1.20]	A09100 Metabolism	B 09105 Amino acid metabolism	C 00260 Glycine, serine and threonine metabolism [PATH:ko00260]	3.97887	9.53425e-05
Sobic.001G259900	K13464	JAZ; jasmonate ZIM domain-containing protein	A09130 Environmental Information Processing	B 09132 Signal transduction	C 04075 Plant hormone signal transduction [PATH:ko04075]	5.96828	0.0671735
Sobic.001G318000	K00799	GST, gst; glutathione S-transferase [EC:2.5.1.18]	A09100 Metabolism	B 09106 Metabolism of other amino acids	C 00480 Glutathione metabolism [PATH:ko00480]	3.45508	0.00251204
Sobic.001G146500	K14488	SAUR; SAUR family protein	A09130 Environmental Information Processing	B 09132 Signal transduction	C 04075 Plant hormone signal transduction [PATH:ko04075]	7.04349	0.0020832
Sobic.001G482700	K13464	JAZ; jasmonate ZIM domain-containing protein	A09130 Environmental Information Processing	B 09132 Signal transduction	C 04075 Plant hormone signal transduction [PATH:ko04075]	4.77094	2.61567e-14
Sobic.001G356000	K09422	MYBP; transcription factor MYB, plant	A09180 Brite Hierarchies	B 09182 Protein families: genetic information processing	C 03000 Transcription factors [BR:ko03000]	2.12483	0.00126656
Sobic.001G105900	K01762	ACS; 1-aminocyclopropane-1-carboxylate synthase [EC:4.4.1.14]	A09100 Metabolism	B 09105 Amino acid metabolism	C 00270 Cysteine and methionine metabolism [PATH:ko00270]	5.77892	0.104703
Sobic.001G094300	K13811	PAPSS; 3'-phosphoadenosine 5'-phosphosulfate synthase [EC:2.7.7.4 2.7.1.25]	A09100 Metabolism	B 09102 Energy metabolism	C 00920 Sulfur metabolism [PATH:ko00920]	2.04327	3.33369e-05
Sobic.001G184300	K03549	kup; KUP system potassium uptake protein	A09180 Brite Hierarchies	B 09183 Protein families: signaling and cellular processes	C 02000 Transporters [BR:ko02000]	2.69261	7.46442e-08
Sobic.001G043000	K15095	E1.1.1.208; (+)-neomenthol dehydrogenase [EC:1.1.1.208]	A09100 Metabolism	B 09109 Metabolism of terpenoids and polyketides	C 00902 Monoterpenoid biosynthesis [PATH:ko00902]	2.29771	1.31744e-05
Sobic.001G125700	K15718	LOX1_5; linoleate 9S-lipoxygenase [EC:1.13.11.58]	A09100 Metabolism	B 09103 Lipid metabolism	C 00591 Linoleic acid metabolism [PATH:ko00591]	5.8507	1.12043e-26
Sobic.001G412700	K00799	GST, gst; glutathione S-transferase [EC:2.5.1.18]	A09100 Metabolism	B 09106 Metabolism of other amino acids	C 00480 Glutathione metabolism [PATH:ko00480]	2.3092	0.000230876
Sobic.001G476600	K10664	ATL6S; E3 ubiquitin-protein ligase ATL6/9/15/31/42/55 [EC:2.3.2.27]	A09180 Brite Hierarchies	B 09182 Protein families: genetic information processing	C 04121 Ubiquitin system [BR:ko04121]	2.19064	0.0114578
Sobic.001G451500	K01915	glnA, GLUL; glutamine synthetase [EC:6.3.1.2]	A09100 Metabolism	B 09101 Carbohydrate metabolism	C 00630 Glyoxylate and dicarboxylate metabolism [PATH:ko00630]	2.34731	2.88468e-06
Sobic.001G259700	K13464	JAZ; jasmonate ZIM domain-containing protein	A09130 Environmental Information Processing	B 09132 Signal transduction	C 04075 Plant hormone signal transduction [PATH:ko04075]	3.33624	1.21767e-07
Sobic.001G080300	K00430	E1.11.1.7; peroxidase [EC:1.11.1.7]	A09100 Metabolism	B 09110 Biosynthesis of other secondary metabolites	C 00940 Phenylpropanoid biosynthesis [PATH:ko00940]	7.65267	6.53954e-05
Sobic.001G034900	K05765	CFL; cofilin	A09140 Cellular Processes	B 09142 Cell motility	C 04810 Regulation of actin cytoskeleton [PATH:ko04810]	2.67112	0.00125865
Sobic.001G309000	K08235	E2.4.1.207; xyloglucan:xyloglucosyl transferase [EC:2.4.1.207]	A09180 Brite Hierarchies	B 09191 Unclassified: metabolism	C 99980 Enzymes with EC numbers	2.5652	0.000369588
Sobic.001G075800	K14411	MSI; RNA-binding protein Musashi	A09120 Genetic Information Processing	B 09122 Translation	C 03015 mRNA surveillance pathway [PATH:ko03015]	3.33544	0.00476749
Sobic.001G470000	K00640	cysE; serine O-acetyltransferase [EC:2.3.1.30]	A09100 Metabolism	B 09102 Energy metabolism	C 00920 Sulfur metabolism [PATH:ko00920]	3.84852	2.20391e-09
Sobic.001G226600	K01177	E3.2.1.2; beta-amylase [EC:3.2.1.2]	A09100 Metabolism	B 09101 Carbohydrate metabolism	C 00500 Starch and sucrose metabolism [PATH:ko00500]	7.12534	0.00140155
Sobic.001G424400	K14497	PP2C; protein phosphatase 2C [EC:3.1.3.16]	A09130 Environmental Information Processing	B 09132 Signal transduction	C 04016 MAPK signaling pathway - plant [PATH:ko04016]	2.10191	0.000112407
Sobic.001G336200	K20619	CYP78A; cytochrome P450 family 78 subfamily A	A09180 Brite Hierarchies	B 09181 Protein families: metabolism	C 00199 Cytochrome P450 [BR:ko00199]	6.65983	0.00737011
Sobic.006G211400	K04121	E4.2.3.19; ent-kaurene synthase [EC:4.2.3.19]	A09100 Metabolism	B 09109 Metabolism of terpenoids and polyketides	C 00904 Diterpenoid biosynthesis [PATH:ko00904]	3.59525	1.47086e-07
Sobic.006G024000	K13691	SGT1; pathogen-inducible salicylic acid glucosyltransferase [EC:2.4.1.-]	A09180 Brite Hierarchies	B 09181 Protein families: metabolism	C 01003 Glycosyltransferases [BR:ko01003]	2.29703	0.00397218
Sobic.006G014700	K00083	CAD; cinnamyl-alcohol dehydrogenase [EC:1.1.1.195]	A09100 Metabolism	B 09110 Biosynthesis of other secondary metabolites	C 00940 Phenylpropanoid biosynthesis [PATH:ko00940]	4.37673	1.90686e-12
Sobic.006G181300	K00422	E1.10.3.1; polyphenol oxidase [EC:1.10.3.1]	A09100 Metabolism	B 09105 Amino acid metabolism	C 00350 Tyrosine metabolism [PATH:ko00350]	3.38378	9.94289e-12
Sobic.006G132500	K01183	E3.2.1.14; chitinase [EC:3.2.1.14]	A09100 Metabolism	B 09101 Carbohydrate metabolism	C 00520 Amino sugar and nucleotide sugar metabolism [PATH:ko00520]	4.66257	2.48335e-14
Sobic.006G145700	K05350	bglB; beta-glucosidase [EC:3.2.1.21]	A09100 Metabolism	B 09101 Carbohydrate metabolism	C 00500 Starch and sucrose metabolism [PATH:ko00500]	3.04293	4.65696e-09
Sobic.006G090400	K14492	ARR-A; two-component response regulator ARR-A family	A09130 Environmental Information Processing	B 09132 Signal transduction	C 04075 Plant hormone signal transduction [PATH:ko04075]	4.25312	1.26478e-09
Sobic.006G132400	K01183	E3.2.1.14; chitinase [EC:3.2.1.14]	A09100 Metabolism	B 09101 Carbohydrate metabolism	C 00520 Amino sugar and nucleotide sugar metabolism [PATH:ko00520]	3.69854	2.17409e-09
Sobic.006G265100	K01179	E3.2.1.4; endoglucanase [EC:3.2.1.4]	A09100 Metabolism	B 09101 Carbohydrate metabolism	C 00500 Starch and sucrose metabolism [PATH:ko00500]	5.77892	0.104703
Sobic.006G263300	K14492	ARR-A; two-component response regulator ARR-A family	A09130 Environmental Information Processing	B 09132 Signal transduction	C 04075 Plant hormone signal transduction [PATH:ko04075]	2.49096	1.25576e-06
Sobic.006G144900	K13103	TFIP11; tuftelin-interacting protein 11	A09180 Brite Hierarchies	B 09182 Protein families: genetic information processing	C 03041 Spliceosome [BR:ko03041]	3.5449	0.0232226
Sobic.006G217900	K13420	FLS2; LRR receptor-like serine/threonine-protein kinase FLS2 [EC:2.7.11.1]	A09130 Environmental Information Processing	B 09132 Signal transduction	C 04016 MAPK signaling pathway - plant [PATH:ko04016]	3.37465	1.73318e-08
Sobic.006G199800	K09422	MYBP; transcription factor MYB, plant	A09180 Brite Hierarchies	B 09182 Protein families: genetic information processing	C 03000 Transcription factors [BR:ko03000]	2.41453	2.37197e-05
Sobic.006G183200	K09338	HD-ZIP; homeobox-leucine zipper protein	A09180 Brite Hierarchies	B 09182 Protein families: genetic information processing	C 03000 Transcription factors [BR:ko03000]	8.34182	3.77003e-07
Sobic.006G168000	K09286	EREBP; EREBP-like factor	A09180 Brite Hierarchies	B 09182 Protein families: genetic information processing	C 03000 Transcription factors [BR:ko03000]	5.58681	3.77897e-11
Sobic.006G221500	K13509	AGPAT1_2; lysophosphatidate acyltransferase [EC:2.3.1.51]	A09100 Metabolism	B 09103 Lipid metabolism	C 00561 Glycerolipid metabolism [PATH:ko00561]	2.91722	0.000124805
Sobic.006G121500	K20617	CYP71A; cytochrome P450 family 71 subfamily A	A09180 Brite Hierarchies	B 09181 Protein families: metabolism	C 00199 Cytochrome P450 [BR:ko00199]	7.04349	0.0020832
Sobic.006G132700	K01183	E3.2.1.14; chitinase [EC:3.2.1.14]	A09100 Metabolism	B 09101 Carbohydrate metabolism	C 00520 Amino sugar and nucleotide sugar metabolism [PATH:ko00520]	7.99511	5.912e-06
Sobic.006G189700	K16281	RHA1; RING-H2 zinc finger protein RHA1	A09180 Brite Hierarchies	B 09182 Protein families: genetic information processing	C 04121 Ubiquitin system [BR:ko04121]	3.40306	3.4479e-10
Sobic.006G115200	K09422	MYBP; transcription factor MYB, plant	A09180 Brite Hierarchies	B 09182 Protein families: genetic information processing	C 03000 Transcription factors [BR:ko03000]	2.18306	0.0337417
Sobic.006G020600	K15397	KCS; 3-ketoacyl-CoA synthase [EC:2.3.1.199]	A09100 Metabolism	B 09103 Lipid metabolism	C 00062 Fatty acid elongation [PATH:ko00062]	2.34662	0.00179003
Sobic.006G091700	K05894	OPR; 12-oxophytodienoic acid reductase [EC:1.3.1.42]	A09100 Metabolism	B 09103 Lipid metabolism	C 00592 alpha-Linolenic acid metabolism [PATH:ko00592]	2.55778	7.35943e-06
Sobic.006G066200	K05359	ADT, PDT; arogenate/prephenate dehydratase [EC:4.2.1.91 4.2.1.51]	A09100 Metabolism	B 09105 Amino acid metabolism	C 00400 Phenylalanine, tyrosine and tryptophan biosynthesis [PATH:ko00400]	3.51858	6.02377e-12
Sobic.006G190100	K24028	DMR6, DLO; salicylic acid 3-hydroxylase [EC:1.14.11.-]	A09180 Brite Hierarchies	B 09191 Unclassified: metabolism	C 99980 Enzymes with EC numbers	4.08577	1.98089e-11
Sobic.006G034300	K00615	E2.2.1.1, tktA, tktB; transketolase [EC:2.2.1.1]	A09100 Metabolism	B 09101 Carbohydrate metabolism	C 00030 Pentose phosphate pathway [PATH:ko00030]	8.44106	1.62034e-07
Sobic.006G227000	K08695	ANR; anthocyanidin reductase [EC:1.3.1.77]	A09100 Metabolism	B 09110 Biosynthesis of other secondary metabolites	C 00941 Flavonoid biosynthesis [PATH:ko00941]	3.44208	6.85552e-07
Sobic.006G181500	K03248	EIF3G; translation initiation factor 3 subunit G	A09180 Brite Hierarchies	B 09182 Protein families: genetic information processing	C 03012 Translation factors [BR:ko03012]	2.45527	0.00181839
Sobic.006G056400	K13464	JAZ; jasmonate ZIM domain-containing protein	A09130 Environmental Information Processing	B 09132 Signal transduction	C 04075 Plant hormone signal transduction [PATH:ko04075]	5.43865	6.34336e-14
Sobic.006G090300	K14492	ARR-A; two-component response regulator ARR-A family	A09130 Environmental Information Processing	B 09132 Signal transduction	C 04075 Plant hormone signal transduction [PATH:ko04075]	2.54482	7.68326e-07
Sobic.006G132300	K01183	E3.2.1.14; chitinase [EC:3.2.1.14]	A09100 Metabolism	B 09101 Carbohydrate metabolism	C 00520 Amino sugar and nucleotide sugar metabolism [PATH:ko00520]	2.72005	2.44043e-06
Sobic.006G114700	K00850	pfkA, PFK; 6-phosphofructokinase 1 [EC:2.7.1.11]	A09100 Metabolism	B 09101 Carbohydrate metabolism	C 00010 Glycolysis / Gluconeogenesis [PATH:ko00010]	3.34381	3.96837e-06
Sobic.006G190000	K24028	DMR6, DLO; salicylic acid 3-hydroxylase [EC:1.14.11.-]	A09180 Brite Hierarchies	B 09191 Unclassified: metabolism	C 99980 Enzymes with EC numbers	8.30716	4.99825e-07
Sobic.006G148900	K10775	PAL; phenylalanine ammonia-lyase [EC:4.3.1.24]	A09100 Metabolism	B 09105 Amino acid metabolism	C 00360 Phenylalanine metabolism [PATH:ko00360]	4.78371	1.47398e-15
Sobic.006G061300	K03549	kup; KUP system potassium uptake protein	A09180 Brite Hierarchies	B 09183 Protein families: signaling and cellular processes	C 02000 Transporters [BR:ko02000]	2.208	1.13329e-05
Sobic.002G055700	K01183	E3.2.1.14; chitinase [EC:3.2.1.14]	A09100 Metabolism	B 09101 Carbohydrate metabolism	C 00520 Amino sugar and nucleotide sugar metabolism [PATH:ko00520]	3.2075	9.2092e-10
Sobic.002G412001	K22991	WDR45, WIPI4, WIPI3; WD repeat-containing protein 45	A09180 Brite Hierarchies	B 09182 Protein families: genetic information processing	C 04131 Membrane trafficking [BR:ko04131]	7.47673	0.000194432
Sobic.002G255700	K00224	CEQORH; chloroplastic oxoene reductase [EC:1.3.1.-]	A09100 Metabolism	B 09103 Lipid metabolism	C 00592 alpha-Linolenic acid metabolism [PATH:ko00592]	6.28559	0.027685
Sobic.002G302300	K01373	CTSF; cathepsin F [EC:3.4.22.41]	A09140 Cellular Processes	B 09141 Transport and catabolism	C 04142 Lysosome [PATH:ko04142]	6.76572	0.00482699
Sobic.002G216400	K20623	CYP92A6; typhasterol/6-deoxotyphasterol 2alpha-hydroxylase	A09100 Metabolism	B 09109 Metabolism of terpenoids and polyketides	C 00905 Brassinosteroid biosynthesis [PATH:ko00905]	2.64962	1.28325e-07
Sobic.002G120400	K11816	YUCCA; indole-3-pyruvate monooxygenase [EC:1.14.13.168]	A09100 Metabolism	B 09105 Amino acid metabolism	C 00380 Tryptophan metabolism [PATH:ko00380]	2.57638	0.0002594
Sobic.002G199500	K02183	CALM; calmodulin	A09130 Environmental Information Processing	B 09132 Signal transduction	C 04016 MAPK signaling pathway - plant [PATH:ko04016]	3.24027	2.21209e-08
Sobic.002G292500	K02927	RP-L40e, RPL40, UBA52; ubiquitin-large subunit ribosomal protein L40e	A09120 Genetic Information Processing	B 09122 Translation	C 03010 Ribosome [PATH:ko03010]	8.44106	1.62034e-07
Sobic.002G389000	K20660	CYP709; cytochrome P450 family 709	A09180 Brite Hierarchies	B 09181 Protein families: metabolism	C 00199 Cytochrome P450 [BR:ko00199]	6.13564	0.0432527
Sobic.002G361100	K00799	GST, gst; glutathione S-transferase [EC:2.5.1.18]	A09100 Metabolism	B 09106 Metabolism of other amino acids	C 00480 Glutathione metabolism [PATH:ko00480]	5.5609	0.163671
Sobic.002G416600	K00430	E1.11.1.7; peroxidase [EC:1.11.1.7]	A09100 Metabolism	B 09110 Biosynthesis of other secondary metabolites	C 00940 Phenylpropanoid biosynthesis [PATH:ko00940]	2.0727	0.000527033
Sobic.002G224100	K15102	SLC25A3, PHC, PIC; solute carrier family 25 (mitochondrial phosphate transporter), member 3	A09180 Brite Hierarchies	B 09183 Protein families: signaling and cellular processes	C 02000 Transporters [BR:ko02000]	7.04349	0.0020832
Sobic.002G423600	K18819	GOLS; inositol 3-alpha-galactosyltransferase [EC:2.4.1.123]	A09100 Metabolism	B 09101 Carbohydrate metabolism	C 00052 Galactose metabolism [PATH:ko00052]	2.74008	3.35585e-07
Sobic.002G284400	K19658	ECH2; peroxisomal enoyl-CoA hydratase 2 [EC:4.2.1.119]	A09180 Brite Hierarchies	B 09191 Unclassified: metabolism	C 99980 Enzymes with EC numbers	4.37556	0.000647892
Sobic.002G214800	K13464	JAZ; jasmonate ZIM domain-containing protein	A09130 Environmental Information Processing	B 09132 Signal transduction	C 04075 Plant hormone signal transduction [PATH:ko04075]	2.06073	3.63916e-05
Sobic.002G298400	K11778	DHDDS, RER2, SRT1; ditrans,polycis-polyprenyl diphosphate synthase [EC:2.5.1.87]	A09100 Metabolism	B 09109 Metabolism of terpenoids and polyketides	C 00900 Terpenoid backbone biosynthesis [PATH:ko00900]	11.6597	2.22012e-24
Sobic.002G208700	K05387	GRIP; glutamate receptor, ionotropic, plant	A09180 Brite Hierarchies	B 09183 Protein families: signaling and cellular processes	C 04040 Ion channels [BR:ko04040]	2.23216	4.50834e-05
Sobic.002G431700	K04802	PCNA; proliferating cell nuclear antigen	A09120 Genetic Information Processing	B 09124 Replication and repair	C 03030 DNA replication [PATH:ko03030]	3.13542	0.000443458
Sobic.002G278800	K01166	RNASET2; ribonuclease T2 [EC:4.6.1.19]	A09180 Brite Hierarchies	B 09182 Protein families: genetic information processing	C 03016 Transfer RNA biogenesis [BR:ko03016]	7.4885	1.44431e-30
Sobic.002G337800	K09422	MYBP; transcription factor MYB, plant	A09180 Brite Hierarchies	B 09182 Protein families: genetic information processing	C 03000 Transcription factors [BR:ko03000]	6.54554	0.0114578
Sobic.002G093400	K14664	ILR1; IAA-amino acid hydrolase [EC:3.5.1.-]	A09180 Brite Hierarchies	B 09181 Protein families: metabolism	C 01002 Peptidases and inhibitors [BR:ko01002]	5.77892	0.104703
Sobic.002G216500	K20623	CYP92A6; typhasterol/6-deoxotyphasterol 2alpha-hydroxylase	A09100 Metabolism	B 09109 Metabolism of terpenoids and polyketides	C 00905 Brassinosteroid biosynthesis [PATH:ko00905]	2.82374	5.19173e-07
Sobic.002G261600	K01188	E3.2.1.21; beta-glucosidase [EC:3.2.1.21]	A09100 Metabolism	B 09101 Carbohydrate metabolism	C 00500 Starch and sucrose metabolism [PATH:ko00500]	2.25456	5.37607e-06
Sobic.002G186500	K22138	MPC1; mitochondrial pyruvate carrier 1	A09160 Human Diseases	B 09166 Cardiovascular disease	0	2.08075	0.00332422
Sobic.002G388900	K20660	CYP709; cytochrome P450 family 709	A09180 Brite Hierarchies	B 09181 Protein families: metabolism	C 00199 Cytochrome P450 [BR:ko00199]	7.99511	5.912e-06
Sobic.002G314300	K05907	APR; adenylyl-sulfate reductase (glutathione) [EC:1.8.4.9]	A09100 Metabolism	B 09102 Energy metabolism	C 00920 Sulfur metabolism [PATH:ko00920]	2.14951	1.24901e-05
Sobic.002G334500	K20924	CSLD; cellulose synthase-like protein [EC:2.4.1.-]	A09180 Brite Hierarchies	B 09181 Protein families: metabolism	C 01003 Glycosyltransferases [BR:ko01003]	2.1219	0.00291093
Sobic.002G278700	K01166	RNASET2; ribonuclease T2 [EC:4.6.1.19]	A09180 Brite Hierarchies	B 09182 Protein families: genetic information processing	C 03016 Transfer RNA biogenesis [BR:ko03016]	4.78701	1.39928e-13
Sobic.002G179800	K15032	MTERFD; mTERF domain-containing protein, mitochondrial	A09180 Brite Hierarchies	B 09182 Protein families: genetic information processing	C 03012 Translation factors [BR:ko03012]	3.57291	0.000116589
Sobic.002G201900	K24193	STP; MFS transporter, SP family, sugar:H+ symporter	A09180 Brite Hierarchies	B 09183 Protein families: signaling and cellular processes	C 02000 Transporters [BR:ko02000]	2.0978	2.62071e-05
Sobic.002G131800	K16280	RGLG; E3 ubiquitin-protein ligase RGLG [EC:2.3.2.27]	A09180 Brite Hierarchies	B 09182 Protein families: genetic information processing	C 04121 Ubiquitin system [BR:ko04121]	2.23113	0.00924338
Sobic.002G272700	K20619	CYP78A; cytochrome P450 family 78 subfamily A	A09180 Brite Hierarchies	B 09181 Protein families: metabolism	C 00199 Cytochrome P450 [BR:ko00199]	2.31537	2.2084e-06
Sobic.002G120300	K11816	YUCCA; indole-3-pyruvate monooxygenase [EC:1.14.13.168]	A09100 Metabolism	B 09105 Amino acid metabolism	C 00380 Tryptophan metabolism [PATH:ko00380]	2.75278	1.36499e-06
Sobic.002G322000	K15283	SLC35E1; solute carrier family 35, member E1	A09180 Brite Hierarchies	B 09183 Protein families: signaling and cellular processes	C 02000 Transporters [BR:ko02000]	2.81399	8.40437e-09
Sobic.002G282900	K01581	E4.1.1.17, ODC1, speC, speF; ornithine decarboxylase [EC:4.1.1.17]	A09100 Metabolism	B 09105 Amino acid metabolism	C 00330 Arginine and proline metabolism [PATH:ko00330]	4.93332	2.66415e-13
Sobic.002G369600	K12930	BZ1; anthocyanidin 3-O-glucosyltransferase [EC:2.4.1.115]	A09100 Metabolism	B 09110 Biosynthesis of other secondary metabolites	C 00942 Anthocyanin biosynthesis [PATH:ko00942]	7.27631	0.000628491
Sobic.002G423300	K09422	MYBP; transcription factor MYB, plant	A09180 Brite Hierarchies	B 09182 Protein families: genetic information processing	C 03000 Transcription factors [BR:ko03000]	6.13564	0.0432527
Sobic.002G020100	K00660	CHS; chalcone synthase [EC:2.3.1.74]	A09100 Metabolism	B 09110 Biosynthesis of other secondary metabolites	C 00941 Flavonoid biosynthesis [PATH:ko00941]	2.98405	0.0241812
Sobic.002G293500	K08193	SLC17A; MFS transporter, ACS family, solute carrier family 17 (sodium-dependent inorganic phosphate cotransporter), other	A09180 Brite Hierarchies	B 09183 Protein families: signaling and cellular processes	C 02000 Transporters [BR:ko02000]	2.16674	3.11064e-05
Sobic.002G265600	K13691	SGT1; pathogen-inducible salicylic acid glucosyltransferase [EC:2.4.1.-]	A09180 Brite Hierarchies	B 09181 Protein families: metabolism	C 01003 Glycosyltransferases [BR:ko01003]	8.53391	9.28821e-08
Sobic.002G338800	K10418	DYNLL; dynein light chain LC8-type	A09150 Organismal Systems	B 09155 Excretory system	0	10.213	9.37026e-16
Sobic.002G329400	K01177	E3.2.1.2; beta-amylase [EC:3.2.1.2]	A09100 Metabolism	B 09101 Carbohydrate metabolism	C 00500 Starch and sucrose metabolism [PATH:ko00500]	3.40924	5.35678e-08
Sobic.002G206600	K22314	GGP; glucosinolate gamma-glutamyl hydrolase [EC:3.4.19.16]	A09180 Brite Hierarchies	B 09191 Unclassified: metabolism	C 99980 Enzymes with EC numbers	7.59638	9.42251e-05
Sobic.002G265800	K13691	SGT1; pathogen-inducible salicylic acid glucosyltransferase [EC:2.4.1.-]	A09180 Brite Hierarchies	B 09181 Protein families: metabolism	C 01003 Glycosyltransferases [BR:ko01003]	3.80625	3.59102e-09
Sobic.002G416700	K00430	E1.11.1.7; peroxidase [EC:1.11.1.7]	A09100 Metabolism	B 09110 Biosynthesis of other secondary metabolites	C 00940 Phenylpropanoid biosynthesis [PATH:ko00940]	2.8002	4.9466e-08
Sobic.002G386200	K02183	CALM; calmodulin	A09130 Environmental Information Processing	B 09132 Signal transduction	C 04016 MAPK signaling pathway - plant [PATH:ko04016]	2.2208	9.61539e-05
Sobic.010G081600	K13496	UGT73C; UDP-glucosyltransferase 73C [EC:2.4.1.-]	A09100 Metabolism	B 09109 Metabolism of terpenoids and polyketides	C 00908 Zeatin biosynthesis [PATH:ko00908]	-2.71036	0.00242723
Sobic.010G215300	K07760	CDK; cyclin-dependent kinase [EC:2.7.11.22]	A09180 Brite Hierarchies	B 09181 Protein families: metabolism	C 01001 Protein kinases [BR:ko01001]	-4.37369	1.29106e-11
Sobic.010G273600	K20547	CHIB; basic endochitinase B [EC:3.2.1.14]	A09100 Metabolism	B 09101 Carbohydrate metabolism	C 00520 Amino sugar and nucleotide sugar metabolism [PATH:ko00520]	-3.34632	3.50265e-09
Sobic.010G068800	K05387	GRIP; glutamate receptor, ionotropic, plant	A09180 Brite Hierarchies	B 09183 Protein families: signaling and cellular processes	C 04040 Ion channels [BR:ko04040]	-3.55241	0.00251204
Sobic.010G175800	K00799	GST, gst; glutathione S-transferase [EC:2.5.1.18]	A09100 Metabolism	B 09106 Metabolism of other amino acids	C 00480 Glutathione metabolism [PATH:ko00480]	-2.77468	4.1834e-06
Sobic.010G047100	K11253	H3; histone H3	A09150 Organismal Systems	B 09151 Immune system	C 04613 Neutrophil extracellular trap formation [PATH:ko04613]	-4.05958	1.80565e-14
Sobic.010G027700	K14488	SAUR; SAUR family protein	A09130 Environmental Information Processing	B 09132 Signal transduction	C 04075 Plant hormone signal transduction [PATH:ko04075]	-2.0116	9.07633e-05
Sobic.010G086000	K18810	CYCD1_2_4; cyclin D1/2/4, plant	A09180 Brite Hierarchies	B 09193 Unclassified: signaling and cellular processes	C 99995 Signaling proteins	-3.11676	0.00402593
Sobic.010G274000	K21777	CCNB; G2/mitotic-specific cyclin-B, other	A09180 Brite Hierarchies	B 09182 Protein families: genetic information processing	C 03032 DNA replication proteins [BR:ko03032]	-6.7226	1.2361e-16
Sobic.010G235300	K03921	FAB2, SSI2, desA1; acyl-[acyl-carrier-protein] desaturase [EC:1.14.19.2 1.14.19.11 1.14.19.26]	A09100 Metabolism	B 09103 Lipid metabolism	C 00061 Fatty acid biosynthesis [PATH:ko00061]	-2.72659	3.58046e-07
Sobic.010G088950	K25006	RBM24_38; RNA-binding protein 24/38	A09180 Brite Hierarchies	B 09182 Protein families: genetic information processing	C 03041 Spliceosome [BR:ko03041]	-9.50206	5.50266e-12
Sobic.010G069300	K20660	CYP709; cytochrome P450 family 709	A09180 Brite Hierarchies	B 09181 Protein families: metabolism	C 00199 Cytochrome P450 [BR:ko00199]	-3.40265	3.16474e-07
Sobic.010G246300	K19041	RNF38_44; E3 ubiquitin-protein ligase RNF38/44 [EC:2.3.2.27]	A09180 Brite Hierarchies	B 09182 Protein families: genetic information processing	C 04121 Ubiquitin system [BR:ko04121]	-8.06254	4.30825e-06
Sobic.010G107200	K15397	KCS; 3-ketoacyl-CoA synthase [EC:2.3.1.199]	A09100 Metabolism	B 09103 Lipid metabolism	C 00062 Fatty acid elongation [PATH:ko00062]	-2.14497	1.40705e-05
Sobic.010G105400	K06678	YCG1, CAPG; condensin complex subunit 3	A09140 Cellular Processes	B 09143 Cell growth and death	C 04111 Cell cycle - yeast [PATH:ko04111]	-3.60726	3.12208e-06
Sobic.010G146100	K09873	TIP; aquaporin TIP	A09180 Brite Hierarchies	B 09183 Protein families: signaling and cellular processes	C 02000 Transporters [BR:ko02000]	-2.66325	4.81978e-08
Sobic.010G248301	K00499	CMO; choline monooxygenase [EC:1.14.15.7]	A09100 Metabolism	B 09105 Amino acid metabolism	C 00260 Glycine, serine and threonine metabolism [PATH:ko00260]	-2.81224	2.23144e-08
Sobic.010G008900	K11498	CENPE; centromeric protein E	A09180 Brite Hierarchies	B 09181 Protein families: metabolism	C 01009 Protein phosphatases and associated proteins [BR:ko01009]	-2.06918	0.000155539
Sobic.010G202700	K09284	AP2; AP2-like factor, euAP2 lineage	A09180 Brite Hierarchies	B 09182 Protein families: genetic information processing	C 03000 Transcription factors [BR:ko03000]	-2.04282	0.00253508
Sobic.010G106100	K01179	E3.2.1.4; endoglucanase [EC:3.2.1.4]	A09100 Metabolism	B 09101 Carbohydrate metabolism	C 00500 Starch and sucrose metabolism [PATH:ko00500]	-3.37386	5.12611e-08
Sobic.010G236800	K08819	CDK12_13; cyclin-dependent kinase 12/13 [EC:2.7.11.22 2.7.11.23]	A09180 Brite Hierarchies	B 09181 Protein families: metabolism	C 01001 Protein kinases [BR:ko01001]	-3.33906	4.82796e-06
Sobic.010G078700	K09338	HD-ZIP; homeobox-leucine zipper protein	A09180 Brite Hierarchies	B 09182 Protein families: genetic information processing	C 03000 Transcription factors [BR:ko03000]	-2.06692	0.000144858
Sobic.010G013600	K08489	STX16; syntaxin 16	A09120 Genetic Information Processing	B 09123 Folding, sorting and degradation	C 04130 SNARE interactions in vesicular transport [PATH:ko04130]	-3.27952	0.00173932
Sobic.010G030100	K09338	HD-ZIP; homeobox-leucine zipper protein	A09180 Brite Hierarchies	B 09182 Protein families: genetic information processing	C 03000 Transcription factors [BR:ko03000]	-2.3026	6.20505e-06
Sobic.010G179400	K08237	E2.4.1.218; hydroquinone glucosyltransferase [EC:2.4.1.218]	A09180 Brite Hierarchies	B 09181 Protein families: metabolism	C 01003 Glycosyltransferases [BR:ko01003]	-5.79691	3.05669e-08
Sobic.010G246600	K14504	TCH4; xyloglucan:xyloglucosyl transferase TCH4 [EC:2.4.1.207]	A09130 Environmental Information Processing	B 09132 Signal transduction	C 04075 Plant hormone signal transduction [PATH:ko04075]	-2.53243	2.21047e-07
Sobic.010G276700	K00695	SUS; sucrose synthase [EC:2.4.1.13]	A09100 Metabolism	B 09101 Carbohydrate metabolism	C 00500 Starch and sucrose metabolism [PATH:ko00500]	-2.75378	3.49442e-08
Sobic.003G361200	K02213	CDC6; cell division control protein 6	A09140 Cellular Processes	B 09143 Cell growth and death	C 04110 Cell cycle [PATH:ko04110]	-8.27126	8.98619e-07
Sobic.003G087900	K01809	manA, MPI; mannose-6-phosphate isomerase [EC:5.3.1.8]	A09100 Metabolism	B 09101 Carbohydrate metabolism	C 00051 Fructose and mannose metabolism [PATH:ko00051]	-2.19018	5.42847e-05
Sobic.003G444100	K03364	CDH1, FZR1; cell division cycle 20-like protein 1, cofactor of APC complex	A09120 Genetic Information Processing	B 09123 Folding, sorting and degradation	C 04120 Ubiquitin mediated proteolysis [PATH:ko04120]	-7.06792	0.0020832
Sobic.003G212800	K10401	KIF18_19; kinesin family member 18/19	A09180 Brite Hierarchies	B 09183 Protein families: signaling and cellular processes	C 04812 Cytoskeleton proteins [BR:ko04812]	-6.13926	1.09506e-15
Sobic.003G179500	K06676	BRRN1, BRN1, CAPH; condensin complex subunit 2	A09140 Cellular Processes	B 09143 Cell growth and death	C 04111 Cell cycle - yeast [PATH:ko04111]	-2.99351	3.03325e-06
Sobic.003G152000	K00430	E1.11.1.7; peroxidase [EC:1.11.1.7]	A09100 Metabolism	B 09110 Biosynthesis of other secondary metabolites	C 00940 Phenylpropanoid biosynthesis [PATH:ko00940]	-4.13452	3.05688e-11
Sobic.003G178500	K15397	KCS; 3-ketoacyl-CoA synthase [EC:2.3.1.199]	A09100 Metabolism	B 09103 Lipid metabolism	C 00062 Fatty acid elongation [PATH:ko00062]	-3.90407	1.05761e-13
Sobic.003G043900	K10406	KIFC2_3; kinesin family member C2/C3	A09180 Brite Hierarchies	B 09183 Protein families: signaling and cellular processes	C 04812 Cytoskeleton proteins [BR:ko04812]	-9.18889	1.79186e-10
Sobic.003G350100	K11252	H2B; histone H2B	A09150 Organismal Systems	B 09151 Immune system	C 04613 Neutrophil extracellular trap formation [PATH:ko04613]	-3.2257	3.76443e-10
Sobic.003G318900	K15341	DCLRE1B, SNM1B; DNA cross-link repair 1B protein [EC:3.1.-.-]	A09180 Brite Hierarchies	B 09182 Protein families: genetic information processing	C 03400 DNA repair and recombination proteins [BR:ko03400]	-2.35178	0.00399551
Sobic.003G092200	K11252	H2B; histone H2B	A09150 Organismal Systems	B 09151 Immune system	C 04613 Neutrophil extracellular trap formation [PATH:ko04613]	-9.28826	5.2198e-11
Sobic.003G152200	K00430	E1.11.1.7; peroxidase [EC:1.11.1.7]	A09100 Metabolism	B 09110 Biosynthesis of other secondary metabolites	C 00940 Phenylpropanoid biosynthesis [PATH:ko00940]	-2.07341	0.000628491
Sobic.003G317700	K05391	CNGC; cyclic nucleotide gated channel, plant	A09150 Organismal Systems	B 09159 Environmental adaptation	0	-2.16362	0.0826346
Sobic.003G024700	K00430	E1.11.1.7; peroxidase [EC:1.11.1.7]	A09100 Metabolism	B 09110 Biosynthesis of other secondary metabolites	C 00940 Phenylpropanoid biosynthesis [PATH:ko00940]	-2.70246	3.28268e-05
Sobic.003G085900	K15925	XYL1; alpha-D-xyloside xylohydrolase [EC:3.2.1.177]	A09180 Brite Hierarchies	B 09191 Unclassified: metabolism	C 99980 Enzymes with EC numbers	-3.10956	5.29467e-10
Sobic.003G127600	K06688	UBE2C, UBC11; ubiquitin-conjugating enzyme E2 C [EC:2.3.2.23]	A09120 Genetic Information Processing	B 09123 Folding, sorting and degradation	C 04120 Ubiquitin mediated proteolysis [PATH:ko04120]	-10.5011	2.90442e-17
Sobic.003G328500	K21777	CCNB; G2/mitotic-specific cyclin-B, other	A09180 Brite Hierarchies	B 09182 Protein families: genetic information processing	C 03032 DNA replication proteins [BR:ko03032]	-5.94098	2.78281e-20
Sobic.003G283500	K17279	REEP5_6; receptor expression-enhancing protein 5/6	A09180 Brite Hierarchies	B 09183 Protein families: signaling and cellular processes	C 04147 Exosome [BR:ko04147]	-2.13418	0.000178276
Sobic.003G148500	K01179	E3.2.1.4; endoglucanase [EC:3.2.1.4]	A09100 Metabolism	B 09101 Carbohydrate metabolism	C 00500 Starch and sucrose metabolism [PATH:ko00500]	-7.06792	0.0020832
Sobic.003G231000	K13082	DFR; bifunctional dihydroflavonol 4-reductase/flavanone 4-reductase [EC:1.1.1.219 1.1.1.234]	A09100 Metabolism	B 09110 Biosynthesis of other secondary metabolites	C 00941 Flavonoid biosynthesis [PATH:ko00941]	-2.49234	0.00484101
Sobic.003G217800	K07936	RAN; GTP-binding nuclear protein Ran	A09120 Genetic Information Processing	B 09122 Translation	C 03013 Nucleocytoplasmic transport [PATH:ko03013]	-2.44882	0.00227462
Sobic.003G057366	K11254	H4; histone H4	A09150 Organismal Systems	B 09151 Immune system	C 04613 Neutrophil extracellular trap formation [PATH:ko04613]	-2.09642	4.65337e-05
Sobic.003G390600	K09285	OVM, ANT; AP2-like factor, ANT lineage	A09180 Brite Hierarchies	B 09182 Protein families: genetic information processing	C 03000 Transcription factors [BR:ko03000]	-2.28362	0.0142655
Sobic.003G391500	K14190	VTC2_5; GDP-L-galactose phosphorylase [EC:2.7.7.69]	A09100 Metabolism	B 09101 Carbohydrate metabolism	C 00053 Ascorbate and aldarate metabolism [PATH:ko00053]	-2.1628	0.00016633
Sobic.003G121000	K00430	E1.11.1.7; peroxidase [EC:1.11.1.7]	A09100 Metabolism	B 09110 Biosynthesis of other secondary metabolites	C 00940 Phenylpropanoid biosynthesis [PATH:ko00940]	-2.91767	1.5118e-08
Sobic.003G024900	K07517	ECI1_2; Delta3-Delta2-enoyl-CoA isomerase [EC:5.3.3.8]	A09100 Metabolism	B 09103 Lipid metabolism	C 00071 Fatty acid degradation [PATH:ko00071]	-2.65816	0.0129194
Sobic.003G418400	K25801	#N/A	#N/A	#N/A	#N/A	-2.71677	0.00983479
Sobic.003G154200	K16297	SCPL-II; serine carboxypeptidase-like clade II [EC:3.4.16.-]	A09180 Brite Hierarchies	B 09181 Protein families: metabolism	C 01002 Peptidases and inhibitors [BR:ko01002]	-2.15094	0.000156126
Sobic.003G070600	K11153	RDH12; retinol dehydrogenase 12 [EC:1.1.1.300]	A09100 Metabolism	B 09108 Metabolism of cofactors and vitamins	C 00830 Retinol metabolism [PATH:ko00830]	-3.03664	1.09853e-09
Sobic.003G120900	K00430	E1.11.1.7; peroxidase [EC:1.11.1.7]	A09100 Metabolism	B 09110 Biosynthesis of other secondary metabolites	C 00940 Phenylpropanoid biosynthesis [PATH:ko00940]	-2.0395	0.0418271
Sobic.003G034600	K08850	AURKX; aurora kinase, other [EC:2.7.11.1]	A09180 Brite Hierarchies	B 09181 Protein families: metabolism	C 01001 Protein kinases [BR:ko01001]	-2.53577	7.60019e-06
Sobic.003G226300	K12349	ASAH2; neutral ceramidase [EC:3.5.1.23]	A09100 Metabolism	B 09103 Lipid metabolism	C 00600 Sphingolipid metabolism [PATH:ko00600]	-6.53223	0.0177562
Sobic.003G387600	K10750	CHAF1A; chromatin assembly factor 1 subunit A	A09180 Brite Hierarchies	B 09182 Protein families: genetic information processing	C 03036 Chromosome and associated proteins [BR:ko03036]	-2.01309	0.000206538
Sobic.003G057100	K11254	H4; histone H4	A09150 Organismal Systems	B 09151 Immune system	C 04613 Neutrophil extracellular trap formation [PATH:ko04613]	-2.39278	3.94915e-06
Sobic.003G107200	K12198	CHMP5, VPS60; charged multivesicular body protein 5	A09140 Cellular Processes	B 09141 Transport and catabolism	C 04144 Endocytosis [PATH:ko04144]	-3.66556	9.28563e-10
Sobic.003G274000	K09422	MYBP; transcription factor MYB, plant	A09180 Brite Hierarchies	B 09182 Protein families: genetic information processing	C 03000 Transcription factors [BR:ko03000]	-6.24619	0.0432527
Sobic.003G328900	K25216	UBAC2; ubiquitin-associated domain-containing protein 2	A09180 Brite Hierarchies	B 09182 Protein families: genetic information processing	C 04121 Ubiquitin system [BR:ko04121]	-2.20022	0.000211584
Sobic.003G006100	K13457	RPM1, RPS3; disease resistance protein RPM1	A09150 Organismal Systems	B 09159 Environmental adaptation	0	-2.60518	6.41748e-07
Sobic.003G260700	K16732	PRC1, ASE1, MAP65; Ase1/PRC1/MAP65 family protein	A09180 Brite Hierarchies	B 09182 Protein families: genetic information processing	C 03036 Chromosome and associated proteins [BR:ko03036]	-5.07253	5.40296e-15
Sobic.003G163700	K03676	grxC, GLRX, GLRX2; glutaredoxin 3	A09180 Brite Hierarchies	B 09182 Protein families: genetic information processing	C 03110 Chaperones and folding catalysts [BR:ko03110]	-2.23192	6.36895e-06
Sobic.003G209900	K08912	LHCB1; light-harvesting complex II chlorophyll a/b binding protein 1	A09100 Metabolism	B 09102 Energy metabolism	C 00196 Photosynthesis - antenna proteins [PATH:ko00196]	-2.03283	3.58434e-05
Sobic.003G208800	K22683	APF2; aspartyl protease family protein [EC:3.4.23.-]	A09180 Brite Hierarchies	B 09181 Protein families: metabolism	C 01002 Peptidases and inhibitors [BR:ko01002]	-2.16843	2.35598e-05
Sobic.003G293500	K03695	clpB; ATP-dependent Clp protease ATP-binding subunit ClpB	A09150 Organismal Systems	B 09149 Aging	0	-2.17699	0.00211735
Sobic.003G118100	K17545	ULK4; serine/threonine-protein kinase ULK4 [EC:2.7.11.1]	A09180 Brite Hierarchies	B 09181 Protein families: metabolism	C 01001 Protein kinases [BR:ko01001]	-2.89323	1.2428e-06
Sobic.003G163500	K03676	grxC, GLRX, GLRX2; glutaredoxin 3	A09180 Brite Hierarchies	B 09182 Protein families: genetic information processing	C 03110 Chaperones and folding catalysts [BR:ko03110]	-3.97643	1.75939e-14
Sobic.003G423600	K06228	FU; fused [EC:2.7.11.1]	A09130 Environmental Information Processing	B 09132 Signal transduction	C 04341 Hedgehog signaling pathway - fly [PATH:ko04341]	-3.47792	3.10776e-07
Sobic.003G034500	K09422	MYBP; transcription factor MYB, plant	A09180 Brite Hierarchies	B 09182 Protein families: genetic information processing	C 03000 Transcription factors [BR:ko03000]	-3.63404	7.04349e-13
Sobic.K029900.1.	K20547	CHIB; basic endochitinase B [EC:3.2.1.14]	A09100 Metabolism	B 09101 Carbohydrate metabolism	C 00520 Amino sugar and nucleotide sugar metabolism [PATH:ko00520]	#N/A	#N/A
Sobic.009G199001	K01307	GGH; gamma-glutamyl hydrolase [EC:3.4.19.9]	A09100 Metabolism	B 09108 Metabolism of cofactors and vitamins	C 00790 Folate biosynthesis [PATH:ko00790]	-2.22429	0.00281309
Sobic.009G170700	K14496	PYL; abscisic acid receptor PYR/PYL family	A09130 Environmental Information Processing	B 09132 Signal transduction	C 04016 MAPK signaling pathway - plant [PATH:ko04016]	-2.72301	0.0234491
Sobic.009G033300	K00430	E1.11.1.7; peroxidase [EC:1.11.1.7]	A09100 Metabolism	B 09110 Biosynthesis of other secondary metabolites	C 00940 Phenylpropanoid biosynthesis [PATH:ko00940]	-6.07864	0.0671735
Sobic.009G192700	K10683	BARD1; BRCA1-associated RING domain protein 1	A09120 Genetic Information Processing	B 09124 Replication and repair	C 03440 Homologous recombination [PATH:ko03440]	-2.51601	4.46303e-05
Sobic.009G157000	K13508	GPAT; glycerol-3-phosphate acyltransferase [EC:2.3.1.15 2.3.1.198]	A09100 Metabolism	B 09103 Lipid metabolism	C 00561 Glycerolipid metabolism [PATH:ko00561]	-2.66955	1.33968e-06
Sobic.009G024800	K10869	RAD51L1, RAD51B; RAD51-like protein 1	A09120 Genetic Information Processing	B 09124 Replication and repair	C 03440 Homologous recombination [PATH:ko03440]	-6.07864	0.0671735
Sobic.009G184200	K06675	SMC4; structural maintenance of chromosome 4	A09140 Cellular Processes	B 09143 Cell growth and death	C 04111 Cell cycle - yeast [PATH:ko04111]	-4.54936	5.35194e-14
Sobic.009G213400	K05863	SLC25A4S, ANT; solute carrier family 25 (mitochondrial adenine nucleotide translocator), member 4/5/6/31	A09130 Environmental Information Processing	B 09132 Signal transduction	C 04020 Calcium signaling pathway [PATH:ko04020]	-2.42551	1.29361e-06
Sobic.009G167500	K11254	H4; histone H4	A09150 Organismal Systems	B 09151 Immune system	C 04613 Neutrophil extracellular trap formation [PATH:ko04613]	-3.06481	1.82715e-09
Sobic.009G163100	K10403	KIF22; kinesin family member 22	A09150 Organismal Systems	B 09152 Endocrine system	0	-2.66634	7.07491e-05
Sobic.009G077500	K04125	GA2ox; gibberellin 2beta-dioxygenase [EC:1.14.11.13]	A09100 Metabolism	B 09109 Metabolism of terpenoids and polyketides	C 00904 Diterpenoid biosynthesis [PATH:ko00904]	-2.03126	0.000423737
Sobic.009G137500	K00799	GST, gst; glutathione S-transferase [EC:2.5.1.18]	A09100 Metabolism	B 09106 Metabolism of other amino acids	C 00480 Glutathione metabolism [PATH:ko00480]	-9.05984	6.71786e-10
Sobic.009G129400	K10406	KIFC2_3; kinesin family member C2/C3	A09180 Brite Hierarchies	B 09183 Protein families: signaling and cellular processes	C 04812 Cytoskeleton proteins [BR:ko04812]	-5.04375	8.40442e-15
Sobic.009G202900	K14490	AHP; histidine-containing phosphotransfer peotein	A09130 Environmental Information Processing	B 09132 Signal transduction	C 04075 Plant hormone signal transduction [PATH:ko04075]	-2.85097	8.53385e-09
Sobic.009G069800	K00844	HK; hexokinase [EC:2.7.1.1]	A09100 Metabolism	B 09101 Carbohydrate metabolism	C 00010 Glycolysis / Gluconeogenesis [PATH:ko00010]	-2.44244	8.62524e-07
Sobic.009G203200	K01051	E3.1.1.11; pectinesterase [EC:3.1.1.11]	A09100 Metabolism	B 09101 Carbohydrate metabolism	C 00040 Pentose and glucuronate interconversions [PATH:ko00040]	-3.91806	2.41966e-13
Sobic.009G180200	K07199	PRKAB; 5'-AMP-activated protein kinase, regulatory beta subunit	A09130 Environmental Information Processing	B 09132 Signal transduction	C 04371 Apelin signaling pathway [PATH:ko04371]	-3.66802	3.29504e-13
Sobic.009G252200	K11644	SIN3A; paired amphipathic helix protein Sin3a	A09140 Cellular Processes	B 09141 Transport and catabolism	C 04139 Mitophagy - yeast [PATH:ko04139]	-2.34533	0.0263808
Sobic.009G136000	K16732	PRC1, ASE1, MAP65; Ase1/PRC1/MAP65 family protein	A09180 Brite Hierarchies	B 09182 Protein families: genetic information processing	C 03036 Chromosome and associated proteins [BR:ko03036]	-3.42777	0.00016643
Sobic.009G047000	K04506	SIAH1; E3 ubiquitin-protein ligase SIAH1 [EC:2.3.2.27]	A09120 Genetic Information Processing	B 09123 Folding, sorting and degradation	C 04120 Ubiquitin mediated proteolysis [PATH:ko04120]	-2.32451	0.000589331
Sobic.009G144900	K00430	E1.11.1.7; peroxidase [EC:1.11.1.7]	A09100 Metabolism	B 09110 Biosynthesis of other secondary metabolites	C 00940 Phenylpropanoid biosynthesis [PATH:ko00940]	-5.88904	0.104703
Sobic.005G098400	K14484	IAA; auxin-responsive protein IAA	A09130 Environmental Information Processing	B 09132 Signal transduction	C 04075 Plant hormone signal transduction [PATH:ko04075]	-3.77704	2.8708e-08
Sobic.005G035100	K13457	RPM1, RPS3; disease resistance protein RPM1	A09150 Organismal Systems	B 09159 Environmental adaptation	0	-2.54304	2.55052e-05
Sobic.005G156100	K01897	ACSL, fadD; long-chain acyl-CoA synthetase [EC:6.2.1.3]	A09100 Metabolism	B 09103 Lipid metabolism	C 00061 Fatty acid biosynthesis [PATH:ko00061]	-2.10236	2.23964e-05
Sobic.005G218000	K00574	cfa; cyclopropane-fatty-acyl-phospholipid synthase [EC:2.1.1.79]	A09180 Brite Hierarchies	B 09191 Unclassified: metabolism	C 99980 Enzymes with EC numbers	-2.1257	2.19064e-05
Sobic.005G130100	K15803	GERD; (-)-germacrene D synthase [EC:4.2.3.75]	A09100 Metabolism	B 09109 Metabolism of terpenoids and polyketides	C 00909 Sesquiterpenoid and triterpenoid biosynthesis [PATH:ko00909]	-4.14036	5.63991e-16
Sobic.005G000500	K10398	KIF11, EG5; kinesin family member 11	A09180 Brite Hierarchies	B 09182 Protein families: genetic information processing	C 03036 Chromosome and associated proteins [BR:ko03036]	-4.35631	4.03345e-10
Sobic.005G204000	K03676	grxC, GLRX, GLRX2; glutaredoxin 3	A09180 Brite Hierarchies	B 09182 Protein families: genetic information processing	C 03110 Chaperones and folding catalysts [BR:ko03110]	-10.6279	4.90614e-18
Sobic.005G047100	K10355	ACTF; actin, other eukaryote	A09180 Brite Hierarchies	B 09183 Protein families: signaling and cellular processes	C 04812 Cytoskeleton proteins [BR:ko04812]	-2.16893	1.13414e-05
Sobic.005G110600	K01183	E3.2.1.14; chitinase [EC:3.2.1.14]	A09100 Metabolism	B 09101 Carbohydrate metabolism	C 00520 Amino sugar and nucleotide sugar metabolism [PATH:ko00520]	-2.99448	1.08456e-08
Sobic.005G129600	K16297	SCPL-II; serine carboxypeptidase-like clade II [EC:3.4.16.-]	A09180 Brite Hierarchies	B 09181 Protein families: metabolism	C 01002 Peptidases and inhibitors [BR:ko01002]	-2.62996	2.70164e-07
Sobic.005G203900	K03676	grxC, GLRX, GLRX2; glutaredoxin 3	A09180 Brite Hierarchies	B 09182 Protein families: genetic information processing	C 03110 Chaperones and folding catalysts [BR:ko03110]	-4.26486	1.34453e-12
Sobic.005G144600	K11498	CENPE; centromeric protein E	A09180 Brite Hierarchies	B 09181 Protein families: metabolism	C 01009 Protein phosphatases and associated proteins [BR:ko01009]	-9.18889	1.79186e-10
Sobic.005G003200	K01953	asnB, ASNS; asparagine synthase (glutamine-hydrolysing) [EC:6.3.5.4]	A09100 Metabolism	B 09105 Amino acid metabolism	C 00250 Alanine, aspartate and glutamate metabolism [PATH:ko00250]	-2.42912	8.11742e-07
Sobic.005G212400	K13457	RPM1, RPS3; disease resistance protein RPM1	A09150 Organismal Systems	B 09159 Environmental adaptation	0	-2.28804	7.09116e-06
Sobic.005G218100	K00574	cfa; cyclopropane-fatty-acyl-phospholipid synthase [EC:2.1.1.79]	A09180 Brite Hierarchies	B 09191 Unclassified: metabolism	C 99980 Enzymes with EC numbers	-8.83718	5.31855e-25
Sobic.005G105850	K16296	SCPL-I; serine carboxypeptidase-like clade I [EC:3.4.16.-]	A09180 Brite Hierarchies	B 09181 Protein families: metabolism	C 01002 Peptidases and inhibitors [BR:ko01002]	-3.53419	1.36265e-10
Sobic.008G162600	K14423	SMO1; plant 4,4-dimethylsterol C-4alpha-methyl-monooxygenase [EC:1.14.18.10]	A09100 Metabolism	B 09103 Lipid metabolism	C 00100 Steroid biosynthesis [PATH:ko00100]	-4.17703	3.47002e-07
Sobic.008G118700	K13447	RBOH; respiratory burst oxidase [EC:1.6.3.- 1.11.1.-]	A09130 Environmental Information Processing	B 09132 Signal transduction	C 04016 MAPK signaling pathway - plant [PATH:ko04016]	-2.68874	1.53152e-05
Sobic.008G148000	K10400	KIF15; kinesin family member 15	A09180 Brite Hierarchies	B 09183 Protein families: signaling and cellular processes	C 04812 Cytoskeleton proteins [BR:ko04812]	-4.20649	2.28511e-11
Sobic.008G123000	K10406	KIFC2_3; kinesin family member C2/C3	A09180 Brite Hierarchies	B 09183 Protein families: signaling and cellular processes	C 04812 Cytoskeleton proteins [BR:ko04812]	-2.35178	0.00399551
Sobic.008G000800	K10398	KIF11, EG5; kinesin family member 11	A09180 Brite Hierarchies	B 09182 Protein families: genetic information processing	C 03036 Chromosome and associated proteins [BR:ko03036]	-2.67438	1.39504e-06
Sobic.008G125700	K00770	E2.4.2.24; 1,4-beta-D-xylan synthase [EC:2.4.2.24]	A09100 Metabolism	B 09101 Carbohydrate metabolism	C 00520 Amino sugar and nucleotide sugar metabolism [PATH:ko00520]	-4.3982	1.00294e-11
Sobic.008G171900	K10406	KIFC2_3; kinesin family member C2/C3	A09180 Brite Hierarchies	B 09183 Protein families: signaling and cellular processes	C 04812 Cytoskeleton proteins [BR:ko04812]	-7.24992	2.17293e-15
Sobic.008G160300	K05576	ndhE; NAD(P)H-quinone oxidoreductase subunit 4L [EC:7.1.1.2]	A09100 Metabolism	B 09102 Energy metabolism	C 00190 Oxidative phosphorylation [PATH:ko00190]	-3.11563	0.0012193
Sobic.008G076200	K15404	K15404, CER1; aldehyde decarbonylase [EC:4.1.99.5]	A09100 Metabolism	B 09103 Lipid metabolism	C 00073 Cutin, suberine and wax biosynthesis [PATH:ko00073]	-3.125	0.145422
Sobic.008G043600	K07195	EXOC7, EXO70; exocyst complex component 7	A09150 Organismal Systems	B 09152 Endocrine system	0	-2.59707	0.0169008
Sobic.008G157100	K25784	#N/A	#N/A	#N/A	#N/A	-2.57496	1.38912e-07
Sobic.008G023300	K13457	RPM1, RPS3; disease resistance protein RPM1	A09150 Organismal Systems	B 09159 Environmental adaptation	0	-2.88593	2.2287e-05
Sobic.008G191600	K08511	ATVAMP72; vesicle-associated membrane protein 72	A09180 Brite Hierarchies	B 09182 Protein families: genetic information processing	C 04131 Membrane trafficking [BR:ko04131]	-2.24552	0.0636927
Sobic.008G110400	K07297	ADIPOR; adiponectin receptor	A09130 Environmental Information Processing	B 09132 Signal transduction	C 04152 AMPK signaling pathway [PATH:ko04152]	-2.14358	0.00133512
Sobic.008G123400	K11491	NCAPD3; condensin-2 complex subunit D3	A09180 Brite Hierarchies	B 09182 Protein families: genetic information processing	C 03036 Chromosome and associated proteins [BR:ko03036]	-2.67096	0.00305284
Sobic.008G078800	K05917	CYP51; sterol 14alpha-demethylase [EC:1.14.14.154 1.14.15.36]	A09100 Metabolism	B 09103 Lipid metabolism	C 00100 Steroid biosynthesis [PATH:ko00100]	-3.64966	0.0337417
Sobic.004G013500	K00963	UGP2, galU, galF; UTP--glucose-1-phosphate uridylyltransferase [EC:2.7.7.9]	A09100 Metabolism	B 09101 Carbohydrate metabolism	C 00040 Pentose and glucuronate interconversions [PATH:ko00040]	-3.08671	3.50364e-09
Sobic.004G259101	K12462	ARHGDI, RHOGDI; Rho GDP-dissociation inhibitor	A09150 Organismal Systems	B 09155 Excretory system	0	-2.82825	4.04856e-08
Sobic.004G038500	K21842	EFR3; protein EFR3	A09180 Brite Hierarchies	B 09182 Protein families: genetic information processing	C 04131 Membrane trafficking [BR:ko04131]	-2.52964	0.00053068
Sobic.004G271300	K03164	TOP2; DNA topoisomerase II [EC:5.6.2.2]	A09160 Human Diseases	B 09176 Drug resistance: antineoplastic	C 01524 Platinum drug resistance [PATH:ko01524]	-4.63405	6.31384e-17
Sobic.004G243900	K09391	E2F7_8; transcription factor E2F7/8	A09180 Brite Hierarchies	B 09182 Protein families: genetic information processing	C 03000 Transcription factors [BR:ko03000]	-5.6707	0.163671
Sobic.004G313900	K09338	HD-ZIP; homeobox-leucine zipper protein	A09180 Brite Hierarchies	B 09182 Protein families: genetic information processing	C 03000 Transcription factors [BR:ko03000]	-2.87503	1.1951e-07
Sobic.004G317200	K20718	ER; LRR receptor-like serine/threonine-protein kinase ERECTA [EC:2.7.11.1]	A09130 Environmental Information Processing	B 09132 Signal transduction	C 04016 MAPK signaling pathway - plant [PATH:ko04016]	-3.92902	2.90701e-13
Sobic.004G310400	K11982	RNF115_126; E3 ubiquitin-protein ligase RNF115/126 [EC:2.3.2.27]	A09180 Brite Hierarchies	B 09182 Protein families: genetic information processing	C 04131 Membrane trafficking [BR:ko04131]	-2.53973	0.0013208
Sobic.004G205300	K11251	H2A; histone H2A	A09140 Cellular Processes	B 09143 Cell growth and death	C 04217 Necroptosis [PATH:ko04217]	-2.66091	1.67252e-06
Sobic.004G223100	K14492	ARR-A; two-component response regulator ARR-A family	A09130 Environmental Information Processing	B 09132 Signal transduction	C 04075 Plant hormone signal transduction [PATH:ko04075]	-8.38338	3.77003e-07
Sobic.004G309000	K01176	AMY, amyA, malS; alpha-amylase [EC:3.2.1.1]	A09100 Metabolism	B 09101 Carbohydrate metabolism	C 00500 Starch and sucrose metabolism [PATH:ko00500]	-2.8028	0.00287471
Sobic.004G222000	K09872	PIP; aquaporin PIP	A09180 Brite Hierarchies	B 09183 Protein families: signaling and cellular processes	C 02000 Transporters [BR:ko02000]	-2.72124	2.88187e-08
Sobic.004G050200	K13082	DFR; bifunctional dihydroflavonol 4-reductase/flavanone 4-reductase [EC:1.1.1.219 1.1.1.234]	A09100 Metabolism	B 09110 Biosynthesis of other secondary metabolites	C 00941 Flavonoid biosynthesis [PATH:ko00941]	-2.63012	3.55124e-05
Sobic.004G126700	K08235	E2.4.1.207; xyloglucan:xyloglucosyl transferase [EC:2.4.1.207]	A09180 Brite Hierarchies	B 09191 Unclassified: metabolism	C 99980 Enzymes with EC numbers	-3.66294	6.08254e-06
Sobic.004G333600	K07964	HPSE; heparanase [EC:3.2.1.166]	A09100 Metabolism	B 09107 Glycan biosynthesis and metabolism	C 00531 Glycosaminoglycan degradation [PATH:ko00531]	-2.34434	2.38694e-06
Sobic.004G105100	K00430	E1.11.1.7; peroxidase [EC:1.11.1.7]	A09100 Metabolism	B 09110 Biosynthesis of other secondary metabolites	C 00940 Phenylpropanoid biosynthesis [PATH:ko00940]	-2.64653	1.0183e-07
Sobic.004G265400	K11252	H2B; histone H2B	A09150 Organismal Systems	B 09151 Immune system	C 04613 Neutrophil extracellular trap formation [PATH:ko04613]	-2.44024	2.01864e-06
Sobic.004G274600	K05658	ABCB1, CD243; ATP-binding cassette, subfamily B (MDR/TAP), member 1 [EC:7.6.2.2]	A09130 Environmental Information Processing	B 09131 Membrane transport	C 02010 ABC transporters [PATH:ko02010]	-2.04634	4.10645e-05
Sobic.004G077100	K02178	BUB1; checkpoint serine/threonine-protein kinase [EC:2.7.11.1]	A09140 Cellular Processes	B 09143 Cell growth and death	C 04110 Cell cycle [PATH:ko04110]	-7.45768	0.000194432
Sobic.004G188701	K24193	STP; MFS transporter, SP family, sugar:H+ symporter	A09180 Brite Hierarchies	B 09183 Protein families: signaling and cellular processes	C 02000 Transporters [BR:ko02000]	-2.28326	0.00714162
Sobic.004G248100	K01179	E3.2.1.4; endoglucanase [EC:3.2.1.4]	A09100 Metabolism	B 09101 Carbohydrate metabolism	C 00500 Starch and sucrose metabolism [PATH:ko00500]	-5.16096	1.70038e-15
Sobic.004G165100	K06910	PEBP, TFS1; phosphatidylethanolamine-binding protein	A09180 Brite Hierarchies	B 09181 Protein families: metabolism	C 01002 Peptidases and inhibitors [BR:ko01002]	-6.77084	0.00737011
Sobic.004G017100	K23151	METTL23; methyltransferase-like protein 23 [EC:2.1.1.-]	A09180 Brite Hierarchies	B 09182 Protein families: genetic information processing	C 03110 Chaperones and folding catalysts [BR:ko03110]	-2.22045	0.0432143
Sobic.004G156900	K03676	grxC, GLRX, GLRX2; glutaredoxin 3	A09180 Brite Hierarchies	B 09182 Protein families: genetic information processing	C 03110 Chaperones and folding catalysts [BR:ko03110]	-9.86603	8.11907e-14
Sobic.004G257600	K20027	ZDHHC1_11; palmitoyltransferase ZDHHC1/11 [EC:2.3.1.225]	A09180 Brite Hierarchies	B 09182 Protein families: genetic information processing	C 04131 Membrane trafficking [BR:ko04131]	-3.0646	1.18818e-06
Sobic.004G357600	K00695	SUS; sucrose synthase [EC:2.4.1.13]	A09100 Metabolism	B 09101 Carbohydrate metabolism	C 00500 Starch and sucrose metabolism [PATH:ko00500]	-2.85921	4.39907e-08
Sobic.004G159400	K07766	E3.6.1.52; diphosphoinositol-polyphosphate diphosphatase [EC:3.6.1.52]	A09180 Brite Hierarchies	B 09191 Unclassified: metabolism	C 99980 Enzymes with EC numbers	-2.28424	0.0337417
Sobic.004G141000	K22596	GGCT; gamma-glutamylcyclotransferase, plant [EC:4.3.2.9]	A09100 Metabolism	B 09106 Metabolism of other amino acids	C 00480 Glutathione metabolism [PATH:ko00480]	-2.40886	9.43283e-07
Sobic.004G036100	K21483	SAMT; salicylate 1-O-methyltransferase [EC:2.1.1.274]	A09180 Brite Hierarchies	B 09191 Unclassified: metabolism	C 99980 Enzymes with EC numbers	-3.70056	1.64822e-13
Sobic.004G047100	K12483	EHD1; EH domain-containing protein 1	A09140 Cellular Processes	B 09141 Transport and catabolism	C 04144 Endocytosis [PATH:ko04144]	-2.6334	7.18251e-05
Sobic.004G279601	K11254	H4; histone H4	A09150 Organismal Systems	B 09151 Immune system	C 04613 Neutrophil extracellular trap formation [PATH:ko04613]	-3.76127	3.31378e-12
Sobic.004G302700	K25796	#N/A	#N/A	#N/A	#N/A	-2.59707	0.0169008
Sobic.004G170500	K11253	H3; histone H3	A09150 Organismal Systems	B 09151 Immune system	C 04613 Neutrophil extracellular trap formation [PATH:ko04613]	-2.47126	5.23057e-06
Sobic.004G095200	K02365	ESP1; separase [EC:3.4.22.49]	A09140 Cellular Processes	B 09143 Cell growth and death	C 04110 Cell cycle [PATH:ko04110]	-2.12849	0.00336968
Sobic.004G190500	K15378	SLC45A1_2_4; solute carrier family 45, member 1/2/4	A09180 Brite Hierarchies	B 09183 Protein families: signaling and cellular processes	C 02000 Transporters [BR:ko02000]	-3.56884	6.00704e-09
Sobic.004G238700	K13680	CSLA; beta-mannan synthase [EC:2.4.1.32]	A09180 Brite Hierarchies	B 09181 Protein families: metabolism	C 01003 Glycosyltransferases [BR:ko01003]	-2.74727	3.40035e-06
Sobic.004G025900	K08235	E2.4.1.207; xyloglucan:xyloglucosyl transferase [EC:2.4.1.207]	A09180 Brite Hierarchies	B 09191 Unclassified: metabolism	C 99980 Enzymes with EC numbers	-2.20775	0.0020832
Sobic.004G106500	K08237	E2.4.1.218; hydroquinone glucosyltransferase [EC:2.4.1.218]	A09180 Brite Hierarchies	B 09181 Protein families: metabolism	C 01003 Glycosyltransferases [BR:ko01003]	-2.10107	0.00397218
Sobic.004G329000	K16297	SCPL-II; serine carboxypeptidase-like clade II [EC:3.4.16.-]	A09180 Brite Hierarchies	B 09181 Protein families: metabolism	C 01002 Peptidases and inhibitors [BR:ko01002]	-3.85773	1.00942e-12
Sobic.004G227900	K20628	exlX; expansin	A09180 Brite Hierarchies	B 09191 Unclassified: metabolism	C 99981 Carbohydrate metabolism	-2.20794	6.73673e-05
Sobic.004G110300	K10664	ATL6S; E3 ubiquitin-protein ligase ATL6/9/15/31/42/55 [EC:2.3.2.27]	A09180 Brite Hierarchies	B 09182 Protein families: genetic information processing	C 04121 Ubiquitin system [BR:ko04121]	-2.16961	0.000731818
Sobic.004G099600	K14484	IAA; auxin-responsive protein IAA	A09130 Environmental Information Processing	B 09132 Signal transduction	C 04075 Plant hormone signal transduction [PATH:ko04075]	-2.81632	8.82604e-06
Sobic.004G355500	K10739	RFA2, RPA2; replication factor A2	A09120 Genetic Information Processing	B 09124 Replication and repair	C 03030 DNA replication [PATH:ko03030]	-2.42966	1.87366e-05
Sobic.004G225400	K16221	TCP21, CHE; transcription factor TCP21 (protein CCA1 HIKING EXPEDITION)	A09150 Organismal Systems	B 09159 Environmental adaptation	0	-3.62611	1.11476e-09
Sobic.004G214000	K00759	APRT, apt; adenine phosphoribosyltransferase [EC:2.4.2.7]	A09100 Metabolism	B 09104 Nucleotide metabolism	C 00230 Purine metabolism [PATH:ko00230]	-3.14355	0.000120303
Sobic.004G064700	K19600	TUB, TULP; tubby and related proteins	A09180 Brite Hierarchies	B 09183 Protein families: signaling and cellular processes	C 04990 Domain-containing proteins not elsewhere classified [BR:ko04990]	-6.65647	0.0114578
Sobic.004G036200	K21483	SAMT; salicylate 1-O-methyltransferase [EC:2.1.1.274]	A09180 Brite Hierarchies	B 09191 Unclassified: metabolism	C 99980 Enzymes with EC numbers	-2.9823	4.57427e-07
Sobic.004G288700	K09872	PIP; aquaporin PIP	A09180 Brite Hierarchies	B 09183 Protein families: signaling and cellular processes	C 02000 Transporters [BR:ko02000]	-2.14721	1.18623e-05
Sobic.004G115600	K09273	UBTF; upstream-binding transcription factor	A09180 Brite Hierarchies	B 09182 Protein families: genetic information processing	C 03000 Transcription factors [BR:ko03000]	-4.68509	5.52323e-15
Sobic.004G325900	K16055	TPS; trehalose 6-phosphate synthase/phosphatase [EC:2.4.1.15 3.1.3.12]	A09100 Metabolism	B 09101 Carbohydrate metabolism	C 00500 Starch and sucrose metabolism [PATH:ko00500]	-3.44125	4.05324e-12
Sobic.004G191800	K09422	MYBP; transcription factor MYB, plant	A09180 Brite Hierarchies	B 09182 Protein families: genetic information processing	C 03000 Transcription factors [BR:ko03000]	-3.75737	4.41468e-12
Sobic.004G230900	K25006	RBM24_38; RNA-binding protein 24/38	A09180 Brite Hierarchies	B 09182 Protein families: genetic information processing	C 03041 Spliceosome [BR:ko03041]	-2.81821	8.22098e-08
Sobic.004G075900	K13680	CSLA; beta-mannan synthase [EC:2.4.1.32]	A09180 Brite Hierarchies	B 09181 Protein families: metabolism	C 01003 Glycosyltransferases [BR:ko01003]	-2.11392	4.85249e-05
Sobic.007G212700	K24345	KIC; calcium-binding protein KIC and related proteins	A09180 Brite Hierarchies	B 09183 Protein families: signaling and cellular processes	C 04812 Cytoskeleton proteins [BR:ko04812]	-3.42188	0.00476749
Sobic.007G071600	K03921	FAB2, SSI2, desA1; acyl-[acyl-carrier-protein] desaturase [EC:1.14.19.2 1.14.19.11 1.14.19.26]	A09100 Metabolism	B 09103 Lipid metabolism	C 00061 Fatty acid biosynthesis [PATH:ko00061]	-2.45511	8.48084e-06
Sobic.007G097000	K06670	SCC1, MCD1, RAD21; cohesin complex subunit SCC1	A09140 Cellular Processes	B 09143 Cell growth and death	C 04110 Cell cycle [PATH:ko04110]	-4.54865	3.0995e-06
Sobic.007G186400	K13457	RPM1, RPS3; disease resistance protein RPM1	A09150 Organismal Systems	B 09159 Environmental adaptation	0	-2.78607	0.00156858
Sobic.007G149600	K11252	H2B; histone H2B	A09150 Organismal Systems	B 09151 Immune system	C 04613 Neutrophil extracellular trap formation [PATH:ko04613]	-3.80847	1.16041e-13
Sobic.007G156500	K01176	AMY, amyA, malS; alpha-amylase [EC:3.2.1.1]	A09100 Metabolism	B 09101 Carbohydrate metabolism	C 00500 Starch and sucrose metabolism [PATH:ko00500]	-5.38099	1.32276e-09
Sobic.007G207700	K07760	CDK; cyclin-dependent kinase [EC:2.7.11.22]	A09180 Brite Hierarchies	B 09181 Protein families: metabolism	C 01001 Protein kinases [BR:ko01001]	-2.84224	1.68572e-05
Sobic.007G032100	K09338	HD-ZIP; homeobox-leucine zipper protein	A09180 Brite Hierarchies	B 09182 Protein families: genetic information processing	C 03000 Transcription factors [BR:ko03000]	-2.28011	7.69625e-06
Sobic.007G221800	K11252	H2B; histone H2B	A09150 Organismal Systems	B 09151 Immune system	C 04613 Neutrophil extracellular trap formation [PATH:ko04613]	-3.53043	6.85077e-12
Sobic.007G168900	K10398	KIF11, EG5; kinesin family member 11	A09180 Brite Hierarchies	B 09182 Protein families: genetic information processing	C 03036 Chromosome and associated proteins [BR:ko03036]	-5.40681	6.44328e-17
Sobic.007G126100	K16055	TPS; trehalose 6-phosphate synthase/phosphatase [EC:2.4.1.15 3.1.3.12]	A09100 Metabolism	B 09101 Carbohydrate metabolism	C 00500 Starch and sucrose metabolism [PATH:ko00500]	-2.46429	5.75283e-07
Sobic.007G008300	K10751	CHAF1B; chromatin assembly factor 1 subunit B	A09180 Brite Hierarchies	B 09182 Protein families: genetic information processing	C 03036 Chromosome and associated proteins [BR:ko03036]	-4.97569	1.47347e-09
Sobic.007G192900	K09264	K09264; MADS-box transcription factor, plant	A09180 Brite Hierarchies	B 09182 Protein families: genetic information processing	C 03000 Transcription factors [BR:ko03000]	-2.28288	0.0013025
Sobic.007G177100	K09422	MYBP; transcription factor MYB, plant	A09180 Brite Hierarchies	B 09182 Protein families: genetic information processing	C 03000 Transcription factors [BR:ko03000]	-2.41339	3.17782e-06
Sobic.007G152900	K02325	POLE2; DNA polymerase epsilon subunit 2 [EC:2.7.7.7]	A09120 Genetic Information Processing	B 09124 Replication and repair	C 03030 DNA replication [PATH:ko03030]	-8.14968	2.29012e-06
Sobic.007G000500	K25507	#N/A	#N/A	#N/A	#N/A	-4.82394	2.48321e-16
Sobic.007G160300	K18810	CYCD1_2_4; cyclin D1/2/4, plant	A09180 Brite Hierarchies	B 09193 Unclassified: signaling and cellular processes	C 99995 Signaling proteins	-4.69724	0.00017133
Sobic.007G092300	K09422	MYBP; transcription factor MYB, plant	A09180 Brite Hierarchies	B 09182 Protein families: genetic information processing	C 03000 Transcription factors [BR:ko03000]	-2.26287	0.000126187
Sobic.007G196000	K11844	USP16_45; ubiquitin carboxyl-terminal hydrolase 16/45 [EC:3.4.19.12]	A09180 Brite Hierarchies	B 09181 Protein families: metabolism	C 01002 Peptidases and inhibitors [BR:ko01002]	-3.27511	0.101516
Sobic.007G136500	K09422	MYBP; transcription factor MYB, plant	A09180 Brite Hierarchies	B 09182 Protein families: genetic information processing	C 03000 Transcription factors [BR:ko03000]	-3.16979	5.00713e-09
Sobic.007G191200	K15382	SLC50A, SWEET; solute carrier family 50 (sugar transporter)	A09180 Brite Hierarchies	B 09183 Protein families: signaling and cellular processes	C 02000 Transporters [BR:ko02000]	-2.48873	4.98637e-05
Sobic.007G130000	K20606	ANP1; mitogen-activated protein kinase kinase kinase ANP1 [EC:2.7.11.25]	A09130 Environmental Information Processing	B 09132 Signal transduction	C 04016 MAPK signaling pathway - plant [PATH:ko04016]	-4.15556	7.16307e-05
Sobic.007G068500	K00422	E1.10.3.1; polyphenol oxidase [EC:1.10.3.1]	A09100 Metabolism	B 09105 Amino acid metabolism	C 00350 Tyrosine metabolism [PATH:ko00350]	-3.60924	6.2148e-12
Sobic.007G170700	K13356	FAR; alcohol-forming fatty acyl-CoA reductase [EC:1.2.1.84]	A09100 Metabolism	B 09103 Lipid metabolism	C 00073 Cutin, suberine and wax biosynthesis [PATH:ko00073]	-5.88904	0.104703
Sobic.001G319200	K00799	GST, gst; glutathione S-transferase [EC:2.5.1.18]	A09100 Metabolism	B 09106 Metabolism of other amino acids	C 00480 Glutathione metabolism [PATH:ko00480]	-2.49643	0.163767
Sobic.001G068301	K16189	PIF4; phytochrome-interacting factor 4	A09130 Environmental Information Processing	B 09132 Signal transduction	C 04075 Plant hormone signal transduction [PATH:ko04075]	-2.24917	4.58768e-06
Sobic.001G406800	K01953	asnB, ASNS; asparagine synthase (glutamine-hydrolysing) [EC:6.3.5.4]	A09100 Metabolism	B 09105 Amino acid metabolism	C 00250 Alanine, aspartate and glutamate metabolism [PATH:ko00250]	-2.11247	2.0894e-05
Sobic.001G377700	K10895	FANCI; fanconi anemia group I protein	A09120 Genetic Information Processing	B 09124 Replication and repair	C 03460 Fanconi anemia pathway [PATH:ko03460]	-7.23665	0.000628491
Sobic.001G205000	K10436	MAPRE; microtubule-associated protein, RP/EB family	A09180 Brite Hierarchies	B 09182 Protein families: genetic information processing	C 03036 Chromosome and associated proteins [BR:ko03036]	-10.2678	5.78994e-16
Sobic.001G458400	K01188	E3.2.1.21; beta-glucosidase [EC:3.2.1.21]	A09100 Metabolism	B 09101 Carbohydrate metabolism	C 00500 Starch and sucrose metabolism [PATH:ko00500]	-2.62587	5.00094e-05
Sobic.001G038500	K14209	SLC36A, PAT; solute carrier family 36 (proton-coupled amino acid transporter)	A09140 Cellular Processes	B 09141 Transport and catabolism	C 04138 Autophagy - yeast [PATH:ko04138]	-2.31693	3.14601e-06
Sobic.001G427400	K11269	CTF18, CHL12; chromosome transmission fidelity protein 18	A09180 Brite Hierarchies	B 09182 Protein families: genetic information processing	C 03036 Chromosome and associated proteins [BR:ko03036]	-3.90535	6.25533e-07
Sobic.001G540900	K07375	TUBB; tubulin beta	A09140 Cellular Processes	B 09141 Transport and catabolism	C 04145 Phagosome [PATH:ko04145]	-2.16025	1.76712e-05
Sobic.001G115400	K20604	MKK9; mitogen-activated protein kinase kinase 9 [EC:2.7.12.2]	A09130 Environmental Information Processing	B 09132 Signal transduction	C 04016 MAPK signaling pathway - plant [PATH:ko04016]	-8.14968	2.29012e-06
Sobic.001G247700	K15397	KCS; 3-ketoacyl-CoA synthase [EC:2.3.1.199]	A09100 Metabolism	B 09103 Lipid metabolism	C 00062 Fatty acid elongation [PATH:ko00062]	-2.96553	3.24002e-09
Sobic.001G514400	K00799	GST, gst; glutathione S-transferase [EC:2.5.1.18]	A09100 Metabolism	B 09106 Metabolism of other amino acids	C 00480 Glutathione metabolism [PATH:ko00480]	-3.2633	1.43178e-10
Sobic.001G009700	K11251	H2A; histone H2A	A09140 Cellular Processes	B 09143 Cell growth and death	C 04217 Necroptosis [PATH:ko04217]	-4.59866	9.88966e-17
Sobic.001G267100	K13946	AUX1, LAX; auxin influx carrier (AUX1 LAX family)	A09130 Environmental Information Processing	B 09132 Signal transduction	C 04075 Plant hormone signal transduction [PATH:ko04075]	-3.6236	6.47511e-08
Sobic.001G441700	K08235	E2.4.1.207; xyloglucan:xyloglucosyl transferase [EC:2.4.1.207]	A09180 Brite Hierarchies	B 09191 Unclassified: metabolism	C 99980 Enzymes with EC numbers	-4.70117	8.36666e-17
Sobic.001G314000	K00430	E1.11.1.7; peroxidase [EC:1.11.1.7]	A09100 Metabolism	B 09110 Biosynthesis of other secondary metabolites	C 00940 Phenylpropanoid biosynthesis [PATH:ko00940]	-2.32298	5.35805e-06
Sobic.001G514200	K00799	GST, gst; glutathione S-transferase [EC:2.5.1.18]	A09100 Metabolism	B 09106 Metabolism of other amino acids	C 00480 Glutathione metabolism [PATH:ko00480]	-2.9038	4.17238e-09
Sobic.001G116900	K23408	CDCA7, JPO1; cell division cycle-associated protein 7	A09180 Brite Hierarchies	B 09182 Protein families: genetic information processing	C 03036 Chromosome and associated proteins [BR:ko03036]	-6.87681	0.00482699
Sobic.001G098900	K08486	STX1B_2_3; syntaxin 1B/2/3	A09120 Genetic Information Processing	B 09123 Folding, sorting and degradation	C 04130 SNARE interactions in vesicular transport [PATH:ko04130]	-3.32647	1.72635e-08
Sobic.001G456500	K07466	RFA1, RPA1, rpa; replication factor A1	A09120 Genetic Information Processing	B 09124 Replication and repair	C 03030 DNA replication [PATH:ko03030]	-2.7076	5.32702e-07
Sobic.001G444400	K00430	E1.11.1.7; peroxidase [EC:1.11.1.7]	A09100 Metabolism	B 09110 Biosynthesis of other secondary metabolites	C 00940 Phenylpropanoid biosynthesis [PATH:ko00940]	-7.87066	1.58908e-05
Sobic.001G333400	K13449	PR1; pathogenesis-related protein 1	A09130 Environmental Information Processing	B 09132 Signal transduction	C 04016 MAPK signaling pathway - plant [PATH:ko04016]	-2.57099	2.71086e-06
Sobic.001G334501	K03921	FAB2, SSI2, desA1; acyl-[acyl-carrier-protein] desaturase [EC:1.14.19.2 1.14.19.11 1.14.19.26]	A09100 Metabolism	B 09103 Lipid metabolism	C 00061 Fatty acid biosynthesis [PATH:ko00061]	-5.79586	3.65784e-22
Sobic.001G276800	K14638	SLC15A3_4, PHT; solute carrier family 15 (peptide/histidine transporter), member 3/4	A09180 Brite Hierarchies	B 09183 Protein families: signaling and cellular processes	C 02000 Transporters [BR:ko02000]	-3.4304	4.67992e-06
Sobic.001G189000	K00430	E1.11.1.7; peroxidase [EC:1.11.1.7]	A09100 Metabolism	B 09110 Biosynthesis of other secondary metabolites	C 00940 Phenylpropanoid biosynthesis [PATH:ko00940]	-2.65712	0.000213743
Sobic.001G534000	K10406	KIFC2_3; kinesin family member C2/C3	A09180 Brite Hierarchies	B 09183 Protein families: signaling and cellular processes	C 04812 Cytoskeleton proteins [BR:ko04812]	-7.49146	9.86413e-17
Sobic.001G416800	K11251	H2A; histone H2A	A09140 Cellular Processes	B 09143 Cell growth and death	C 04217 Necroptosis [PATH:ko04217]	-4.24342	9.37026e-16
Sobic.001G271600	K19861	BEBT, AMAT; benzyl alcohol O-benzoyltransferase [EC:2.3.1.196 2.3.1.232]	A09180 Brite Hierarchies	B 09191 Unclassified: metabolism	C 99980 Enzymes with EC numbers	-2.2152	2.37197e-05
Sobic.001G109700	K19001	HELLS, DDM1; ATP-dependent DNA helicase	A09180 Brite Hierarchies	B 09182 Protein families: genetic information processing	C 03036 Chromosome and associated proteins [BR:ko03036]	-4.97433	7.2827e-11
Sobic.001G067800	K07238	TC.ZIP, zupT, ZRT3, ZIP2; zinc transporter, ZIP family	A09180 Brite Hierarchies	B 09183 Protein families: signaling and cellular processes	C 02000 Transporters [BR:ko02000]	-2.61514	1.52583e-05
Sobic.001G379600	K07198	PRKAA, AMPK; 5'-AMP-activated protein kinase, catalytic alpha subunit [EC:2.7.11.11]	A09130 Environmental Information Processing	B 09132 Signal transduction	C 04371 Apelin signaling pathway [PATH:ko04371]	-2.0165	5.09532e-05
Sobic.001G016201	K11548	NUF2, CDCA1; kinetochore protein Nuf2	A09180 Brite Hierarchies	B 09182 Protein families: genetic information processing	C 03036 Chromosome and associated proteins [BR:ko03036]	-5.85934	4.40123e-14
Sobic.001G529400	K11254	H4; histone H4	A09150 Organismal Systems	B 09151 Immune system	C 04613 Neutrophil extracellular trap formation [PATH:ko04613]	-3.53261	3.50368e-12
Sobic.001G204400	K09422	MYBP; transcription factor MYB, plant	A09180 Brite Hierarchies	B 09182 Protein families: genetic information processing	C 03000 Transcription factors [BR:ko03000]	-4.58672	0.000332125
Sobic.001G013400	K11548	NUF2, CDCA1; kinetochore protein Nuf2	A09180 Brite Hierarchies	B 09182 Protein families: genetic information processing	C 03036 Chromosome and associated proteins [BR:ko03036]	-2.76035	1.42478e-05
Sobic.001G078600	K08850	AURKX; aurora kinase, other [EC:2.7.11.1]	A09180 Brite Hierarchies	B 09181 Protein families: metabolism	C 01001 Protein kinases [BR:ko01001]	-7.52442	0.000135471
Sobic.001G505100	K09873	TIP; aquaporin TIP	A09180 Brite Hierarchies	B 09183 Protein families: signaling and cellular processes	C 02000 Transporters [BR:ko02000]	-2.40782	7.92355e-07
Sobic.001G113800	K00924	E2.7.1.-; kinase [EC:2.7.1.-]	A09180 Brite Hierarchies	B 09191 Unclassified: metabolism	C 99980 Enzymes with EC numbers	-2.46194	6.75343e-07
Sobic.001G158300	K12191	CHMP2A; charged multivesicular body protein 2A	A09140 Cellular Processes	B 09141 Transport and catabolism	C 04144 Endocytosis [PATH:ko04144]	-2.98407	4.38815e-06
Sobic.001G088400	K10400	KIF15; kinesin family member 15	A09180 Brite Hierarchies	B 09183 Protein families: signaling and cellular processes	C 04812 Cytoskeleton proteins [BR:ko04812]	-3.60122	2.83441e-09
Sobic.001G452900	K19891	GN1_2_3; glucan endo-1,3-beta-glucosidase 1/2/3 [EC:3.2.1.39]	A09100 Metabolism	B 09101 Carbohydrate metabolism	C 00500 Starch and sucrose metabolism [PATH:ko00500]	-3.01664	1.38957e-07
Sobic.001G045800	K01184	E3.2.1.15; polygalacturonase [EC:3.2.1.15]	A09100 Metabolism	B 09101 Carbohydrate metabolism	C 00040 Pentose and glucuronate interconversions [PATH:ko00040]	-5.88904	0.104703
Sobic.001G488900	K09338	HD-ZIP; homeobox-leucine zipper protein	A09180 Brite Hierarchies	B 09182 Protein families: genetic information processing	C 03000 Transcription factors [BR:ko03000]	-2.67358	3.30544e-07
Sobic.001G416900	K11251	H2A; histone H2A	A09140 Cellular Processes	B 09143 Cell growth and death	C 04217 Necroptosis [PATH:ko04217]	-2.6827	1.54377e-07
Sobic.001G514300	K00799	GST, gst; glutathione S-transferase [EC:2.5.1.18]	A09100 Metabolism	B 09106 Metabolism of other amino acids	C 00480 Glutathione metabolism [PATH:ko00480]	-6.2501	1.22307e-21
Sobic.001G004500	K22522	LOG; cytokinin riboside 5'-monophosphate phosphoribohydrolase [EC:3.2.2.-]	A09180 Brite Hierarchies	B 09191 Unclassified: metabolism	C 99980 Enzymes with EC numbers	-2.1797	0.173012
Sobic.001G435700	K17338	REEP1_2_3_4; receptor expression-enhancing protein 1/2/3/4	A09180 Brite Hierarchies	B 09193 Unclassified: signaling and cellular processes	C 99992 Structural proteins	-2.54819	3.491e-07
Sobic.001G439000	K13946	AUX1, LAX; auxin influx carrier (AUX1 LAX family)	A09130 Environmental Information Processing	B 09132 Signal transduction	C 04075 Plant hormone signal transduction [PATH:ko04075]	-6.53798	1.37732e-15
Sobic.001G177900	K10400	KIF15; kinesin family member 15	A09180 Brite Hierarchies	B 09183 Protein families: signaling and cellular processes	C 04812 Cytoskeleton proteins [BR:ko04812]	-4.73485	4.8239e-15
Sobic.001G175000	K15601	KDM3; [histone H3]-dimethyl-L-lysine9 demethylase [EC:1.14.11.65]	A09150 Organismal Systems	B 09159 Environmental adaptation	0	-2.66853	5.43902e-05
Sobic.006G259100	K12483	EHD1; EH domain-containing protein 1	A09140 Cellular Processes	B 09141 Transport and catabolism	C 04144 Endocytosis [PATH:ko04144]	-7.45768	0.000194432
Sobic.006G119300	K10744	RNASEH2B; ribonuclease H2 subunit B	A09120 Genetic Information Processing	B 09124 Replication and repair	C 03030 DNA replication [PATH:ko03030]	-2.07312	0.00470371
Sobic.006G144500	K15404	K15404, CER1; aldehyde decarbonylase [EC:4.1.99.5]	A09100 Metabolism	B 09103 Lipid metabolism	C 00073 Cutin, suberine and wax biosynthesis [PATH:ko00073]	-3.57841	1.2621e-08
Sobic.006G121600	K20617	CYP71A; cytochrome P450 family 71 subfamily A	A09180 Brite Hierarchies	B 09181 Protein families: metabolism	C 00199 Cytochrome P450 [BR:ko00199]	-6.77084	0.00737011
Sobic.006G081800	K11253	H3; histone H3	A09150 Organismal Systems	B 09151 Immune system	C 04613 Neutrophil extracellular trap formation [PATH:ko04613]	-3.79615	1.05825e-11
Sobic.006G035600	K10400	KIF15; kinesin family member 15	A09180 Brite Hierarchies	B 09183 Protein families: signaling and cellular processes	C 04812 Cytoskeleton proteins [BR:ko04812]	-3.94722	3.0236e-10
Sobic.006G153500	K16297	SCPL-II; serine carboxypeptidase-like clade II [EC:3.4.16.-]	A09180 Brite Hierarchies	B 09181 Protein families: metabolism	C 01002 Peptidases and inhibitors [BR:ko01002]	-4.67313	1.43707e-13
Sobic.006G126700	K02537	MAD2; mitotic spindle assembly checkpoint protein MAD2	A09140 Cellular Processes	B 09143 Cell growth and death	C 04110 Cell cycle [PATH:ko04110]	-3.24934	1.82299e-07
Sobic.006G179200	K21777	CCNB; G2/mitotic-specific cyclin-B, other	A09180 Brite Hierarchies	B 09182 Protein families: genetic information processing	C 03032 DNA replication proteins [BR:ko03032]	-4.26286	2.23144e-08
Sobic.006G233600	K20729	EPF1_2; protein EPIDERMAL PATTERNING FACTOR 1/2	A09130 Environmental Information Processing	B 09132 Signal transduction	C 04016 MAPK signaling pathway - plant [PATH:ko04016]	-2.22045	0.0432143
Sobic.006G112800	K10406	KIFC2_3; kinesin family member C2/C3	A09180 Brite Hierarchies	B 09183 Protein families: signaling and cellular processes	C 04812 Cytoskeleton proteins [BR:ko04812]	-5.74253	3.90314e-16
Sobic.006G046500	K00809	DHPS, dys; deoxyhypusine synthase [EC:2.5.1.46]	A09180 Brite Hierarchies	B 09191 Unclassified: metabolism	C 99980 Enzymes with EC numbers	-3.60499	4.37043e-12
Sobic.006G170800	K00025	MDH1; malate dehydrogenase [EC:1.1.1.37]	A09100 Metabolism	B 09101 Carbohydrate metabolism	C 00020 Citrate cycle (TCA cycle) [PATH:ko00020]	-2.20479	3.35263e-05
Sobic.006G195500	K10742	DNA2; DNA replication ATP-dependent helicase Dna2 [EC:3.6.4.12]	A09120 Genetic Information Processing	B 09124 Replication and repair	C 03030 DNA replication [PATH:ko03030]	-3.6135	0.00186149
Sobic.006G069500	K17479	GRXCR1; glutaredoxin domain-containing cysteine-rich protein 1	A09180 Brite Hierarchies	B 09181 Protein families: metabolism	C 01009 Protein phosphatases and associated proteins [BR:ko01009]	-9.03716	8.37709e-10
Sobic.006G154000	K16221	TCP21, CHE; transcription factor TCP21 (protein CCA1 HIKING EXPEDITION)	A09150 Organismal Systems	B 09159 Environmental adaptation	0	-2.38495	0.000382309
Sobic.006G228100	K08235	E2.4.1.207; xyloglucan:xyloglucosyl transferase [EC:2.4.1.207]	A09180 Brite Hierarchies	B 09191 Unclassified: metabolism	C 99980 Enzymes with EC numbers	-3.12605	1.86697e-09
Sobic.006G180100	K14209	SLC36A, PAT; solute carrier family 36 (proton-coupled amino acid transporter)	A09140 Cellular Processes	B 09141 Transport and catabolism	C 04138 Autophagy - yeast [PATH:ko04138]	-2.45601	0.00954304
Sobic.006G029300	K15505	RAD5; DNA repair protein RAD5 [EC:3.6.4.-]	A09180 Brite Hierarchies	B 09182 Protein families: genetic information processing	C 03400 DNA repair and recombination proteins [BR:ko03400]	-3.53528	0.0485105
Sobic.006G107500	K09422	MYBP; transcription factor MYB, plant	A09180 Brite Hierarchies	B 09182 Protein families: genetic information processing	C 03000 Transcription factors [BR:ko03000]	-10.1669	1.95168e-15
Sobic.006G240300	K10882	EME1, MMS4; crossover junction endonuclease EME1 [EC:3.1.22.-]	A09120 Genetic Information Processing	B 09124 Replication and repair	C 03440 Homologous recombination [PATH:ko03440]	-4.63957	1.46596e-06
Sobic.006G255300	K14486	K14486, ARF; auxin response factor	A09130 Environmental Information Processing	B 09132 Signal transduction	C 04075 Plant hormone signal transduction [PATH:ko04075]	-5.19366	8.69613e-09
Sobic.006G247800	K00430	E1.11.1.7; peroxidase [EC:1.11.1.7]	A09100 Metabolism	B 09110 Biosynthesis of other secondary metabolites	C 00940 Phenylpropanoid biosynthesis [PATH:ko00940]	-2.78921	1.0183e-07
Sobic.006G021100	K00434	E1.11.1.11; L-ascorbate peroxidase [EC:1.11.1.11]	A09100 Metabolism	B 09101 Carbohydrate metabolism	C 00053 Ascorbate and aldarate metabolism [PATH:ko00053]	-2.20753	1.87366e-05
Sobic.006G184200	K19045	BB; E3 ubiquitin-protein ligase BIG BROTHER and related proteins [EC:2.3.2.27]	A09180 Brite Hierarchies	B 09182 Protein families: genetic information processing	C 04121 Ubiquitin system [BR:ko04121]	-3.56843	1.39787e-08
Sobic.006G268200	K00218	por; protochlorophyllide reductase [EC:1.3.1.33]	A09100 Metabolism	B 09108 Metabolism of cofactors and vitamins	C 00860 Porphyrin and chlorophyll metabolism [PATH:ko00860]	-2.88206	3.50265e-09
Sobic.006G214000	K00558	DNMT1, dcm; DNA (cytosine-5)-methyltransferase 1 [EC:2.1.1.37]	A09100 Metabolism	B 09105 Amino acid metabolism	C 00270 Cysteine and methionine metabolism [PATH:ko00270]	-3.4372	3.21192e-10
Sobic.006G076400	K11253	H3; histone H3	A09150 Organismal Systems	B 09151 Immune system	C 04613 Neutrophil extracellular trap formation [PATH:ko04613]	-4.77399	9.42679e-14
Sobic.006G058000	K16297	SCPL-II; serine carboxypeptidase-like clade II [EC:3.4.16.-]	A09180 Brite Hierarchies	B 09181 Protein families: metabolism	C 01002 Peptidases and inhibitors [BR:ko01002]	-3.39985	7.72266e-11
Sobic.006G204500	K19882	NOTUM; O-palmitoleoyl-L-serine hydrolase [EC:3.1.1.98]	A09130 Environmental Information Processing	B 09132 Signal transduction	C 04310 Wnt signaling pathway [PATH:ko04310]	-2.35831	3.14391e-06
Sobic.002G353800	K09338	HD-ZIP; homeobox-leucine zipper protein	A09180 Brite Hierarchies	B 09182 Protein families: genetic information processing	C 03000 Transcription factors [BR:ko03000]	-7.7079	4.53664e-05
Sobic.002G390800	K10400	KIF15; kinesin family member 15	A09180 Brite Hierarchies	B 09183 Protein families: signaling and cellular processes	C 04812 Cytoskeleton proteins [BR:ko04812]	-2.37714	1.99367e-05
Sobic.002G158900	K01904	4CL; 4-coumarate--CoA ligase [EC:6.2.1.12]	A09100 Metabolism	B 09108 Metabolism of cofactors and vitamins	C 00130 Ubiquinone and other terpenoid-quinone biosynthesis [PATH:ko00130]	-2.64335	0.000110224
Sobic.002G427100	K10728	TOPBP1; topoisomerase (DNA) II binding protein 1	A09120 Genetic Information Processing	B 09124 Replication and repair	C 03440 Homologous recombination [PATH:ko03440]	-9.1258	3.4479e-10
Sobic.002G221800	K17279	REEP5_6; receptor expression-enhancing protein 5/6	A09180 Brite Hierarchies	B 09183 Protein families: signaling and cellular processes	C 04147 Exosome [BR:ko04147]	-2.37733	0.00068762
Sobic.002G108800	K24139	PILS, ECM3; auxin efflux carrier family protein	A09180 Brite Hierarchies	B 09183 Protein families: signaling and cellular processes	C 02000 Transporters [BR:ko02000]	-7.3877	0.000287211
Sobic.002G367700	K14638	SLC15A3_4, PHT; solute carrier family 15 (peptide/histidine transporter), member 3/4	A09180 Brite Hierarchies	B 09183 Protein families: signaling and cellular processes	C 02000 Transporters [BR:ko02000]	-2.624	7.94709e-08
Sobic.002G334100	K20924	CSLD; cellulose synthase-like protein [EC:2.4.1.-]	A09180 Brite Hierarchies	B 09181 Protein families: metabolism	C 01003 Glycosyltransferases [BR:ko01003]	-3.57665	3.44115e-11
Sobic.002G219500	K08900	BCS1; mitochondrial chaperone BCS1	A09180 Brite Hierarchies	B 09182 Protein families: genetic information processing	C 03029 Mitochondrial biogenesis [BR:ko03029]	-4.02298	1.32125e-06
Sobic.002G319300	K16743	ASPM, ASP; abnormal spindle-like microcephaly-associated protein	A09180 Brite Hierarchies	B 09182 Protein families: genetic information processing	C 03036 Chromosome and associated proteins [BR:ko03036]	-4.08711	8.48324e-09
Sobic.002G230900	K18810	CYCD1_2_4; cyclin D1/2/4, plant	A09180 Brite Hierarchies	B 09193 Unclassified: signaling and cellular processes	C 99995 Signaling proteins	-3.02911	9.39679e-08
Sobic.002G037700	K10891	FANCD2; fanconi anemia group D2 protein	A09120 Genetic Information Processing	B 09124 Replication and repair	C 03460 Fanconi anemia pathway [PATH:ko03460]	-4.19297	0.00257634
Sobic.002G054901	K18187	PET100F; protein PET100, fungi type	A09180 Brite Hierarchies	B 09182 Protein families: genetic information processing	C 03029 Mitochondrial biogenesis [BR:ko03029]	-2.13562	0.0153289
Sobic.002G390700	K16315	GSG2; serine/threonine-protein kinase haspin [EC:2.7.11.1]	A09180 Brite Hierarchies	B 09181 Protein families: metabolism	C 01001 Protein kinases [BR:ko01001]	-8.67537	2.47645e-08
Sobic.002G273500	K01179	E3.2.1.4; endoglucanase [EC:3.2.1.4]	A09100 Metabolism	B 09101 Carbohydrate metabolism	C 00500 Starch and sucrose metabolism [PATH:ko00500]	-3.68964	4.73456e-07
Sobic.002G191000	K20606	ANP1; mitogen-activated protein kinase kinase kinase ANP1 [EC:2.7.11.25]	A09130 Environmental Information Processing	B 09132 Signal transduction	C 04016 MAPK signaling pathway - plant [PATH:ko04016]	-5.72343	2.78432e-11
Sobic.002G184600	K01087	otsB; trehalose 6-phosphate phosphatase [EC:3.1.3.12]	A09100 Metabolism	B 09101 Carbohydrate metabolism	C 00500 Starch and sucrose metabolism [PATH:ko00500]	-2.21628	7.43525e-06
Sobic.002G415600	K09286	EREBP; EREBP-like factor	A09180 Brite Hierarchies	B 09182 Protein families: genetic information processing	C 03000 Transcription factors [BR:ko03000]	-7.7079	4.53664e-05
Sobic.002G313000	K16812	TPX2; targeting protein for Xklp2	A09180 Brite Hierarchies	B 09182 Protein families: genetic information processing	C 03036 Chromosome and associated proteins [BR:ko03036]	-4.5837	1.11115e-13
Sobic.002G071850	K13457	RPM1, RPS3; disease resistance protein RPM1	A09150 Organismal Systems	B 09159 Environmental adaptation	0	-2.2961	0.00146285
Sobic.002G256900	K10782	FATA; fatty acyl-ACP thioesterase A [EC:3.1.2.14]	A09100 Metabolism	B 09103 Lipid metabolism	C 00061 Fatty acid biosynthesis [PATH:ko00061]	-2.44957	4.32708e-05
Sobic.002G179700	K15397	KCS; 3-ketoacyl-CoA synthase [EC:2.3.1.199]	A09100 Metabolism	B 09103 Lipid metabolism	C 00062 Fatty acid elongation [PATH:ko00062]	-2.09235	2.46264e-05
Sobic.002G004100	K10405	KIFC1; kinesin family member C1	A09180 Brite Hierarchies	B 09182 Protein families: genetic information processing	C 03036 Chromosome and associated proteins [BR:ko03036]	-4.80123	1.26551e-14
Sobic.002G258300	K00430	E1.11.1.7; peroxidase [EC:1.11.1.7]	A09100 Metabolism	B 09110 Biosynthesis of other secondary metabolites	C 00940 Phenylpropanoid biosynthesis [PATH:ko00940]	-3.54827	1.72635e-08
Sobic.002G253500	K00306	PIPOX; sarcosine oxidase / L-pipecolate oxidase [EC:1.5.3.1 1.5.3.7]	A09100 Metabolism	B 09105 Amino acid metabolism	C 00260 Glycine, serine and threonine metabolism [PATH:ko00260]	-2.71243	1.08154e-07
Sobic.002G124700	K09872	PIP; aquaporin PIP	A09180 Brite Hierarchies	B 09183 Protein families: signaling and cellular processes	C 02000 Transporters [BR:ko02000]	-2.22869	5.27006e-06
Sobic.002G194500	K08235	E2.4.1.207; xyloglucan:xyloglucosyl transferase [EC:2.4.1.207]	A09180 Brite Hierarchies	B 09191 Unclassified: metabolism	C 99980 Enzymes with EC numbers	-2.51685	0.000143661
Sobic.002G051400	K00485	FMO; dimethylaniline monooxygenase (N-oxide forming) [EC:1.14.13.8]	A09100 Metabolism	B 09111 Xenobiotics biodegradation and metabolism	C 00982 Drug metabolism - cytochrome P450 [PATH:ko00982]	-3.40938	8.91683e-11
Sobic.002G224200	K09419	HSFF; heat shock transcription factor, other eukaryote	A09180 Brite Hierarchies	B 09182 Protein families: genetic information processing	C 03000 Transcription factors [BR:ko03000]	-3.0094	0.000150823
Sobic.002G245300	K14445	SLC13A2_3_5; solute carrier family 13 (sodium-dependent dicarboxylate transporter), member 2/3/5	A09180 Brite Hierarchies	B 09183 Protein families: signaling and cellular processes	C 02000 Transporters [BR:ko02000]	-8.0463	2.16566e-29
Sobic.002G190700	K18810	CYCD1_2_4; cyclin D1/2/4, plant	A09180 Brite Hierarchies	B 09193 Unclassified: signaling and cellular processes	C 99995 Signaling proteins	-2.87162	2.64262e-07
Sobic.002G323700	K08486	STX1B_2_3; syntaxin 1B/2/3	A09120 Genetic Information Processing	B 09123 Folding, sorting and degradation	C 04130 SNARE interactions in vesicular transport [PATH:ko04130]	-7.15475	0.000931109
Sobic.002G038500	K08064	NFYA, HAP2; nuclear transcription factor Y, alpha	A09150 Organismal Systems	B 09151 Immune system	C 04612 Antigen processing and presentation [PATH:ko04612]	-2.39258	1.54055e-05
Sobic.002G188500	K16055	TPS; trehalose 6-phosphate synthase/phosphatase [EC:2.4.1.15 3.1.3.12]	A09100 Metabolism	B 09101 Carbohydrate metabolism	C 00500 Starch and sucrose metabolism [PATH:ko00500]	-2.32187	2.44043e-06

## Sheet: Tx2783_6dpi
Gene ID	KO	Gene name	Tier 1	Tier 2	Tier 3	Log2-fold change	p-adjusted
Sobic.010G068900	K05387	GRIP; glutamate receptor, ionotropic, plant	A09180 Brite Hierarchies	B 09183 Protein families: signaling and cellular processes	C 04040 Ion channels [BR:ko04040]	2.0144	0.0044512
Sobic.010G084600	K05894	OPR; 12-oxophytodienoic acid reductase [EC:1.3.1.42]	A09100 Metabolism	B 09103 Lipid metabolism	C 00592 alpha-Linolenic acid metabolism [PATH:ko00592]	5.7066	0.116567
Sobic.010G131600	K05863	SLC25A4S, ANT; solute carrier family 25 (mitochondrial adenine nucleotide translocator), member 4/5/6/31	A09130 Environmental Information Processing	B 09132 Signal transduction	C 04020 Calcium signaling pathway [PATH:ko04020]	2.51073	0.00561554
Sobic.010G183600	K16241	HY5; transcription factor HY5	A09150 Organismal Systems	B 09159 Environmental adaptation	0	4.61906	7.70095e-12
Sobic.010G108301	K15397	KCS; 3-ketoacyl-CoA synthase [EC:2.3.1.199]	A09100 Metabolism	B 09103 Lipid metabolism	C 00062 Fatty acid elongation [PATH:ko00062]	7.05218	0.00075637
Sobic.010G104300	K13993	HSP20; HSP20 family protein	A09120 Genetic Information Processing	B 09123 Folding, sorting and degradation	C 04141 Protein processing in endoplasmic reticulum [PATH:ko04141]	7.83189	7.59244e-06
Sobic.010G120600	K23154	CGT; 2-hydroxyflavanone C-glucosyltransferase [EC:2.4.1.360]	A09180 Brite Hierarchies	B 09191 Unclassified: metabolism	C 99980 Enzymes with EC numbers	3.10871	1.89699e-10
Sobic.010G087800	K13993	HSP20; HSP20 family protein	A09120 Genetic Information Processing	B 09123 Folding, sorting and degradation	C 04141 Protein processing in endoplasmic reticulum [PATH:ko04141]	2.29885	0.00276576
Sobic.010G095400	K20989	DUR3; urea-proton symporter	A09180 Brite Hierarchies	B 09183 Protein families: signaling and cellular processes	C 02000 Transporters [BR:ko02000]	3.39933	1.42903e-11
Sobic.010G124500	K10251	HSD17B12, KAR, IFA38; 17beta-estradiol 17-dehydrogenase / very-long-chain 3-oxoacyl-CoA reductase [EC:1.1.1.62 1.1.1.330]	A09100 Metabolism	B 09103 Lipid metabolism	C 00062 Fatty acid elongation [PATH:ko00062]	3.05211	0.000179502
Sobic.010G222100	K10523	SPOP; speckle-type POZ protein	A09130 Environmental Information Processing	B 09132 Signal transduction	C 04340 Hedgehog signaling pathway [PATH:ko04340]	3.01662	0.000760724
Sobic.010G180600	K14484	IAA; auxin-responsive protein IAA	A09130 Environmental Information Processing	B 09132 Signal transduction	C 04075 Plant hormone signal transduction [PATH:ko04075]	2.27846	4.64564e-06
Sobic.010G108600	K15397	KCS; 3-ketoacyl-CoA synthase [EC:2.3.1.199]	A09100 Metabolism	B 09103 Lipid metabolism	C 00062 Fatty acid elongation [PATH:ko00062]	2.20602	0.00503753
Sobic.010G192366	K14431	TGA; transcription factor TGA	A09130 Environmental Information Processing	B 09132 Signal transduction	C 04075 Plant hormone signal transduction [PATH:ko04075]	4.56957	1.85559e-08
Sobic.010G121000	K13457	RPM1, RPS3; disease resistance protein RPM1	A09150 Organismal Systems	B 09159 Environmental adaptation	0	3.06391	1.55531e-06
Sobic.010G110100	K14431	TGA; transcription factor TGA	A09130 Environmental Information Processing	B 09132 Signal transduction	C 04075 Plant hormone signal transduction [PATH:ko04075]	2.85693	0.000113596
Sobic.010G277700	K00791	miaA, TRIT1; tRNA dimethylallyltransferase [EC:2.5.1.75]	A09100 Metabolism	B 09109 Metabolism of terpenoids and polyketides	C 00908 Zeatin biosynthesis [PATH:ko00908]	2.56711	3.29121e-05
Sobic.010G170300	K01188	E3.2.1.21; beta-glucosidase [EC:3.2.1.21]	A09100 Metabolism	B 09101 Carbohydrate metabolism	C 00500 Starch and sucrose metabolism [PATH:ko00500]	2.41161	9.48824e-07
Sobic.010G167500	K00924	E2.7.1.-; kinase [EC:2.7.1.-]	A09180 Brite Hierarchies	B 09191 Unclassified: metabolism	C 99980 Enzymes with EC numbers	2.13674	1.00196e-05
Sobic.010G220500	K02083	allC; allantoate deiminase [EC:3.5.3.9]	A09100 Metabolism	B 09104 Nucleotide metabolism	C 00230 Purine metabolism [PATH:ko00230]	2.40999	4.60224e-07
Sobic.010G070000	K20660	CYP709; cytochrome P450 family 709	A09180 Brite Hierarchies	B 09181 Protein families: metabolism	C 00199 Cytochrome P450 [BR:ko00199]	2.19064	0.0499121
Sobic.010G084700	K05894	OPR; 12-oxophytodienoic acid reductase [EC:1.3.1.42]	A09100 Metabolism	B 09103 Lipid metabolism	C 00592 alpha-Linolenic acid metabolism [PATH:ko00592]	8.00625	2.72214e-06
Sobic.010G264500	K14488	SAUR; SAUR family protein	A09130 Environmental Information Processing	B 09132 Signal transduction	C 04075 Plant hormone signal transduction [PATH:ko04075]	2.21876	4.15259e-06
Sobic.010G192432	K14431	TGA; transcription factor TGA	A09130 Environmental Information Processing	B 09132 Signal transduction	C 04075 Plant hormone signal transduction [PATH:ko04075]	2.92385	2.49371e-06
Sobic.010G066700	K13065	E2.3.1.133, HCT; shikimate O-hydroxycinnamoyltransferase [EC:2.3.1.133]	A09100 Metabolism	B 09110 Biosynthesis of other secondary metabolites	C 00940 Phenylpropanoid biosynthesis [PATH:ko00940]	2.82421	2.13478e-06
Sobic.010G074700	K01598	PPCDC, coaC; phosphopantothenoylcysteine decarboxylase [EC:4.1.1.36]	A09100 Metabolism	B 09108 Metabolism of cofactors and vitamins	C 00770 Pantothenate and CoA biosynthesis [PATH:ko00770]	5.4888	0.116567
Sobic.010G077400	K13566	NIT2, yafV; omega-amidase [EC:3.5.1.3]	A09100 Metabolism	B 09105 Amino acid metabolism	C 00250 Alanine, aspartate and glutamate metabolism [PATH:ko00250]	2.28126	0.000825601
Sobic.010G245500	K00430	E1.11.1.7; peroxidase [EC:1.11.1.7]	A09100 Metabolism	B 09110 Biosynthesis of other secondary metabolites	C 00940 Phenylpropanoid biosynthesis [PATH:ko00940]	3.41712	8.29357e-08
Sobic.010G188300	K01623	ALDO; fructose-bisphosphate aldolase, class I [EC:4.1.2.13]	A09100 Metabolism	B 09101 Carbohydrate metabolism	C 00010 Glycolysis / Gluconeogenesis [PATH:ko00010]	4.43775	1.09007e-18
Sobic.010G259600	K19861	BEBT, AMAT; benzyl alcohol O-benzoyltransferase [EC:2.3.1.196 2.3.1.232]	A09180 Brite Hierarchies	B 09191 Unclassified: metabolism	C 99980 Enzymes with EC numbers	3.45415	1.96802e-12
Sobic.010G224600	K14488	SAUR; SAUR family protein	A09130 Environmental Information Processing	B 09132 Signal transduction	C 04075 Plant hormone signal transduction [PATH:ko04075]	5.89578	0.0722761
Sobic.010G093400	K00703	glgA; starch synthase [EC:2.4.1.21]	A09100 Metabolism	B 09101 Carbohydrate metabolism	C 00500 Starch and sucrose metabolism [PATH:ko00500]	2.57126	5.4129e-05
Sobic.010G170000	K11155	DGAT1; diacylglycerol O-acyltransferase 1 [EC:2.3.1.20 2.3.1.75 2.3.1.76]	A09100 Metabolism	B 09103 Lipid metabolism	C 00561 Glycerolipid metabolism [PATH:ko00561]	2.02382	0.000132877
Sobic.010G252500	K14488	SAUR; SAUR family protein	A09130 Environmental Information Processing	B 09132 Signal transduction	C 04075 Plant hormone signal transduction [PATH:ko04075]	3.14432	7.38919e-07
Sobic.010G039401	K01738	cysK; cysteine synthase [EC:2.5.1.47]	A09100 Metabolism	B 09102 Energy metabolism	C 00920 Sulfur metabolism [PATH:ko00920]	2.99917	5.06026e-06
Sobic.010G069900	K20660	CYP709; cytochrome P450 family 709	A09180 Brite Hierarchies	B 09181 Protein families: metabolism	C 00199 Cytochrome P450 [BR:ko00199]	5.5593	7.92453e-19
Sobic.010G240300	K05350	bglB; beta-glucosidase [EC:3.2.1.21]	A09100 Metabolism	B 09101 Carbohydrate metabolism	C 00500 Starch and sucrose metabolism [PATH:ko00500]	5.4888	0.116567
Sobic.010G066601	K13065	E2.3.1.133, HCT; shikimate O-hydroxycinnamoyltransferase [EC:2.3.1.133]	A09100 Metabolism	B 09110 Biosynthesis of other secondary metabolites	C 00940 Phenylpropanoid biosynthesis [PATH:ko00940]	3.39681	1.03966e-07
Sobic.003G070800	K18592	GGT1_5, CD224; gamma-glutamyltranspeptidase / glutathione hydrolase / leukotriene-C4 hydrolase [EC:2.3.2.2 3.4.19.13 3.4.19.14]	A09100 Metabolism	B 09103 Lipid metabolism	C 00590 Arachidonic acid metabolism [PATH:ko00590]	2.41381	5.39264e-07
Sobic.003G007200	K09873	TIP; aquaporin TIP	A09180 Brite Hierarchies	B 09183 Protein families: signaling and cellular processes	C 02000 Transporters [BR:ko02000]	2.48862	0.00149475
Sobic.003G371400	K14638	SLC15A3_4, PHT; solute carrier family 15 (peptide/histidine transporter), member 3/4	A09180 Brite Hierarchies	B 09183 Protein families: signaling and cellular processes	C 02000 Transporters [BR:ko02000]	8.49007	4.97654e-08
Sobic.003G223600	K08237	E2.4.1.218; hydroquinone glucosyltransferase [EC:2.4.1.218]	A09180 Brite Hierarchies	B 09181 Protein families: metabolism	C 01003 Glycosyltransferases [BR:ko01003]	2.45078	1.67915e-05
Sobic.003G152100	K00430	E1.11.1.7; peroxidase [EC:1.11.1.7]	A09100 Metabolism	B 09110 Biosynthesis of other secondary metabolites	C 00940 Phenylpropanoid biosynthesis [PATH:ko00940]	5.89578	0.0722761
Sobic.003G403300	K00696	E2.4.1.14; sucrose-phosphate synthase [EC:2.4.1.14]	A09100 Metabolism	B 09101 Carbohydrate metabolism	C 00500 Starch and sucrose metabolism [PATH:ko00500]	2.01866	2.14505e-05
Sobic.003G015200	K15382	SLC50A, SWEET; solute carrier family 50 (sugar transporter)	A09180 Brite Hierarchies	B 09183 Protein families: signaling and cellular processes	C 02000 Transporters [BR:ko02000]	2.65441	2.84964e-05
Sobic.003G264500	K00799	GST, gst; glutathione S-transferase [EC:2.5.1.18]	A09100 Metabolism	B 09106 Metabolism of other amino acids	C 00480 Glutathione metabolism [PATH:ko00480]	8.54763	2.83823e-08
Sobic.003G371600	K14638	SLC15A3_4, PHT; solute carrier family 15 (peptide/histidine transporter), member 3/4	A09180 Brite Hierarchies	B 09183 Protein families: signaling and cellular processes	C 02000 Transporters [BR:ko02000]	3.74929	1.41644e-13
Sobic.003G370400	K03320	amt, AMT, MEP; ammonium transporter, Amt family	A09180 Brite Hierarchies	B 09183 Protein families: signaling and cellular processes	C 02000 Transporters [BR:ko02000]	2.95639	0.00436642
Sobic.003G012300	K15109	SLC25A20_29, CACT, CACL, CRC1; solute carrier family 25 (mitochondrial carnitine/acylcarnitine transporter), member 20/29	A09150 Organismal Systems	B 09159 Environmental adaptation	0	2.5295	6.51239e-07
Sobic.003G071300	K10703	HACD, PHS1, PAS2; very-long-chain (3R)-3-hydroxyacyl-CoA dehydratase [EC:4.2.1.134]	A09100 Metabolism	B 09103 Lipid metabolism	C 00062 Fatty acid elongation [PATH:ko00062]	3.78807	7.82679e-09
Sobic.003G071100	K10703	HACD, PHS1, PAS2; very-long-chain (3R)-3-hydroxyacyl-CoA dehydratase [EC:4.2.1.134]	A09100 Metabolism	B 09103 Lipid metabolism	C 00062 Fatty acid elongation [PATH:ko00062]	2.79714	3.08854e-05
Sobic.003G363400	K14432	ABF; ABA responsive element binding factor	A09130 Environmental Information Processing	B 09132 Signal transduction	C 04075 Plant hormone signal transduction [PATH:ko04075]	2.95639	0.00436642
Sobic.003G017200	K16223	FT; protein FLOWERING LOCUS T	A09150 Organismal Systems	B 09159 Environmental adaptation	0	3.49517	0.0142907
Sobic.003G403900	K13947	PIN; auxin efflux carrier family protein	A09180 Brite Hierarchies	B 09183 Protein families: signaling and cellular processes	C 02000 Transporters [BR:ko02000]	2.35526	1.55369e-06
Sobic.003G430400	K13448	CML; calcium-binding protein CML	A09150 Organismal Systems	B 09159 Environmental adaptation	0	6.06301	0.0447833
Sobic.003G425850	K00799	GST, gst; glutathione S-transferase [EC:2.5.1.18]	A09100 Metabolism	B 09106 Metabolism of other amino acids	C 00480 Glutathione metabolism [PATH:ko00480]	2.25303	0.010756
Sobic.003G255700	K10581	UBE2O; ubiquitin-conjugating enzyme E2 O [EC:2.3.2.24]	A09120 Genetic Information Processing	B 09123 Folding, sorting and degradation	C 04120 Ubiquitin mediated proteolysis [PATH:ko04120]	2.04198	7.49769e-05
Sobic.003G278600	K17471	SULTR3; sulfate transporter 3	A09180 Brite Hierarchies	B 09183 Protein families: signaling and cellular processes	C 02000 Transporters [BR:ko02000]	2.75894	8.33009e-08
Sobic.003G306500	K14487	GH3; auxin responsive GH3 gene family	A09130 Environmental Information Processing	B 09132 Signal transduction	C 04075 Plant hormone signal transduction [PATH:ko04075]	6.47265	0.0107979
Sobic.003G169400	K03046	rpoC; DNA-directed RNA polymerase subunit beta' [EC:2.7.7.6]	A09120 Genetic Information Processing	B 09121 Transcription	C 03020 RNA polymerase [PATH:ko03020]	4.15145	7.75498e-08
Sobic.003G203600	K12355	REF1; coniferyl-aldehyde dehydrogenase [EC:1.2.1.68]	A09100 Metabolism	B 09110 Biosynthesis of other secondary metabolites	C 00940 Phenylpropanoid biosynthesis [PATH:ko00940]	6.61576	9.09244e-25
Sobic.003G323500	K17609	NXN; nucleoredoxin [EC:1.8.1.8]	A09180 Brite Hierarchies	B 09181 Protein families: metabolism	C 01009 Protein phosphatases and associated proteins [BR:ko01009]	3.07386	1.34474e-09
Sobic.003G231300	K05917	CYP51; sterol 14alpha-demethylase [EC:1.14.14.154 1.14.15.36]	A09100 Metabolism	B 09103 Lipid metabolism	C 00100 Steroid biosynthesis [PATH:ko00100]	6.21286	0.0277297
Sobic.003G098100	K09874	NIP; aquaporin NIP	A09180 Brite Hierarchies	B 09183 Protein families: signaling and cellular processes	C 02000 Transporters [BR:ko02000]	2.00486	0.00282192
Sobic.003G226600	K13425	WRKY22; WRKY transcription factor 22	A09130 Environmental Information Processing	B 09132 Signal transduction	C 04016 MAPK signaling pathway - plant [PATH:ko04016]	8.33525	1.57245e-07
Sobic.003G282800	K18159	NDUFAF1, CIA30; NADH dehydrogenase [ubiquinone] 1 alpha subcomplex assembly factor 1	A09150 Organismal Systems	B 09159 Environmental adaptation	0	8.12445	1.01193e-06
Sobic.003G276400	K01176	AMY, amyA, malS; alpha-amylase [EC:3.2.1.1]	A09100 Metabolism	B 09101 Carbohydrate metabolism	C 00500 Starch and sucrose metabolism [PATH:ko00500]	3.91994	3.25715e-15
Sobic.003G018800	K23978	IAH1; isoamyl acetate esterase [EC:3.1.1.112]	A09180 Brite Hierarchies	B 09191 Unclassified: metabolism	C 99980 Enzymes with EC numbers	7.05218	0.00075637
Sobic.003G128900	K09422	MYBP; transcription factor MYB, plant	A09180 Brite Hierarchies	B 09182 Protein families: genetic information processing	C 03000 Transcription factors [BR:ko03000]	2.70267	0.00171058
Sobic.003G341100	K13424	WRKY33; WRKY transcription factor 33	A09130 Environmental Information Processing	B 09132 Signal transduction	C 04016 MAPK signaling pathway - plant [PATH:ko04016]	2.40419	4.91515e-05
Sobic.003G312300	K00547	mmuM, BHMT2; homocysteine S-methyltransferase [EC:2.1.1.10]	A09100 Metabolism	B 09105 Amino acid metabolism	C 00270 Cysteine and methionine metabolism [PATH:ko00270]	8.49007	4.97654e-08
Sobic.003G103701	K04728	ATM, TEL1; serine-protein kinase ATM [EC:2.7.11.1]	A09120 Genetic Information Processing	B 09124 Replication and repair	C 03440 Homologous recombination [PATH:ko03440]	2.1	2.02576e-05
Sobic.003G116800	K09753	CCR; cinnamoyl-CoA reductase [EC:1.2.1.44]	A09100 Metabolism	B 09110 Biosynthesis of other secondary metabolites	C 00940 Phenylpropanoid biosynthesis [PATH:ko00940]	8.98273	4.80354e-10
Sobic.003G171900	K03689	petN; cytochrome b6-f complex subunit 8	A09100 Metabolism	B 09102 Energy metabolism	C 00195 Photosynthesis [PATH:ko00195]	2.14831	6.69841e-05
Sobic.003G209600	K13248	PHOSPHO2; pyridoxal phosphate phosphatase PHOSPHO2 [EC:3.1.3.74]	A09100 Metabolism	B 09108 Metabolism of cofactors and vitamins	C 00750 Vitamin B6 metabolism [PATH:ko00750]	2.10467	9.35965e-05
Sobic.003G267100	K05658	ABCB1, CD243; ATP-binding cassette, subfamily B (MDR/TAP), member 1 [EC:7.6.2.2]	A09130 Environmental Information Processing	B 09131 Membrane transport	C 02010 ABC transporters [PATH:ko02010]	2.5146	2.144e-07
Sobic.003G332700	K01188	E3.2.1.21; beta-glucosidase [EC:3.2.1.21]	A09100 Metabolism	B 09101 Carbohydrate metabolism	C 00500 Starch and sucrose metabolism [PATH:ko00500]	2.10378	9.44066e-06
Sobic.003G376000	K24917	AAP; amino acid permease	A09180 Brite Hierarchies	B 09183 Protein families: signaling and cellular processes	C 02000 Transporters [BR:ko02000]	2.92067	2.17852e-08
Sobic.003G378301	K17362	ACOT13; acyl-coenzyme A thioesterase 13 [EC:3.1.2.-]	A09180 Brite Hierarchies	B 09181 Protein families: metabolism	C 01004 Lipid biosynthesis proteins [BR:ko01004]	6.34859	0.0172452
Sobic.003G164800	K00799	GST, gst; glutathione S-transferase [EC:2.5.1.18]	A09100 Metabolism	B 09106 Metabolism of other amino acids	C 00480 Glutathione metabolism [PATH:ko00480]	7.9646	3.82591e-06
Sobic.003G100000	K05350	bglB; beta-glucosidase [EC:3.2.1.21]	A09100 Metabolism	B 09101 Carbohydrate metabolism	C 00500 Starch and sucrose metabolism [PATH:ko00500]	2.1902	0.0240727
Sobic.003G041500	K14553	UTP18; U3 small nucleolar RNA-associated protein 18	A09120 Genetic Information Processing	B 09122 Translation	C 03008 Ribosome biogenesis in eukaryotes [PATH:ko03008]	2.09145	0.0771823
Sobic.003G355500	K00002	AKR1A1, adh; alcohol dehydrogenase (NADP+) [EC:1.1.1.2]	A09100 Metabolism	B 09101 Carbohydrate metabolism	C 00010 Glycolysis / Gluconeogenesis [PATH:ko00010]	2.5698	8.50288e-08
Sobic.003G371100	K14638	SLC15A3_4, PHT; solute carrier family 15 (peptide/histidine transporter), member 3/4	A09180 Brite Hierarchies	B 09183 Protein families: signaling and cellular processes	C 02000 Transporters [BR:ko02000]	4.32699	9.27126e-13
Sobic.003G030200	K01598	PPCDC, coaC; phosphopantothenoylcysteine decarboxylase [EC:4.1.1.36]	A09100 Metabolism	B 09108 Metabolism of cofactors and vitamins	C 00770 Pantothenate and CoA biosynthesis [PATH:ko00770]	2.17684	0.00272431
Sobic.003G154400	K16297	SCPL-II; serine carboxypeptidase-like clade II [EC:3.4.16.-]	A09180 Brite Hierarchies	B 09181 Protein families: metabolism	C 01002 Peptidases and inhibitors [BR:ko01002]	3.6111	0.000290044
Sobic.003G134100	K03264	EIF6; translation initiation factor 6	A09120 Genetic Information Processing	B 09122 Translation	C 03008 Ribosome biogenesis in eukaryotes [PATH:ko03008]	7.05218	0.00075637
Sobic.003G097900	K04506	SIAH1; E3 ubiquitin-protein ligase SIAH1 [EC:2.3.2.27]	A09120 Genetic Information Processing	B 09123 Folding, sorting and degradation	C 04120 Ubiquitin mediated proteolysis [PATH:ko04120]	2.15108	0.000291927
Sobic.003G017300	K01937	pyrG, CTPS; CTP synthase [EC:6.3.4.2]	A09100 Metabolism	B 09104 Nucleotide metabolism	C 00240 Pyrimidine metabolism [PATH:ko00240]	6.79132	0.00276094
Sobic.003G280500	K03234	EEF2; elongation factor 2	A09130 Environmental Information Processing	B 09132 Signal transduction	C 04152 AMPK signaling pathway [PATH:ko04152]	6.47265	0.0107979
Sobic.003G226800	K09419	HSFF; heat shock transcription factor, other eukaryote	A09180 Brite Hierarchies	B 09182 Protein families: genetic information processing	C 03000 Transcription factors [BR:ko03000]	2.88827	8.1596e-06
Sobic.003G414600	K00949	thiN, TPK1, THI80; thiamine pyrophosphokinase [EC:2.7.6.2]	A09100 Metabolism	B 09108 Metabolism of cofactors and vitamins	C 00730 Thiamine metabolism [PATH:ko00730]	2.33646	3.94553e-06
Sobic.003G431800	K07562	NMD3; 60S ribosomal export protein NMD3	A09120 Genetic Information Processing	B 09122 Translation	C 03013 Nucleocytoplasmic transport [PATH:ko03013]	7.57935	4.6825e-05
Sobic.003G244100	K09060	GBF; plant G-box-binding factor	A09180 Brite Hierarchies	B 09182 Protein families: genetic information processing	C 03000 Transcription factors [BR:ko03000]	3.1644	1.04371e-06
Sobic.003G264400	K00799	GST, gst; glutathione S-transferase [EC:2.5.1.18]	A09100 Metabolism	B 09106 Metabolism of other amino acids	C 00480 Glutathione metabolism [PATH:ko00480]	6.47265	0.0107979
Sobic.003G140700	K00430	E1.11.1.7; peroxidase [EC:1.11.1.7]	A09100 Metabolism	B 09110 Biosynthesis of other secondary metabolites	C 00940 Phenylpropanoid biosynthesis [PATH:ko00940]	2.49548	1.82019e-06
Sobic.003G150700	K19882	NOTUM; O-palmitoleoyl-L-serine hydrolase [EC:3.1.1.98]	A09130 Environmental Information Processing	B 09132 Signal transduction	C 04310 Wnt signaling pathway [PATH:ko04310]	2.46757	2.7128e-05
Sobic.003G309700	K01593	DDC, TDC; aromatic-L-amino-acid/L-tryptophan decarboxylase [EC:4.1.1.28 4.1.1.105]	A09100 Metabolism	B 09105 Amino acid metabolism	C 00350 Tyrosine metabolism [PATH:ko00350]	2.2143	2.0533e-05
Sobic.003G036700	K00279	CKX; cytokinin dehydrogenase [EC:1.5.99.12]	A09100 Metabolism	B 09109 Metabolism of terpenoids and polyketides	C 00908 Zeatin biosynthesis [PATH:ko00908]	7.57935	4.6825e-05
Sobic.003G047700	K13496	UGT73C; UDP-glucosyltransferase 73C [EC:2.4.1.-]	A09100 Metabolism	B 09109 Metabolism of terpenoids and polyketides	C 00908 Zeatin biosynthesis [PATH:ko00908]	2.45304	4.91213e-07
Sobic.003G389500	K15032	MTERFD; mTERF domain-containing protein, mitochondrial	A09180 Brite Hierarchies	B 09182 Protein families: genetic information processing	C 03012 Translation factors [BR:ko03012]	2.33804	0.000286804
Sobic.003G442601	K03123	TFIIA2, GTF2A2, TOA2; transcription initiation factor TFIIA small subunit	A09120 Genetic Information Processing	B 09121 Transcription	C 03022 Basal transcription factors [PATH:ko03022]	2.91603	1.00013e-05
Sobic.009G080400	K08237	E2.4.1.218; hydroquinone glucosyltransferase [EC:2.4.1.218]	A09180 Brite Hierarchies	B 09181 Protein families: metabolism	C 01003 Glycosyltransferases [BR:ko01003]	4.11702	1.35618e-06
Sobic.009G169000	K01568	PDC, pdc; pyruvate decarboxylase [EC:4.1.1.1]	A09100 Metabolism	B 09101 Carbohydrate metabolism	C 00010 Glycolysis / Gluconeogenesis [PATH:ko00010]	8.16179	7.30875e-07
Sobic.009G075900	K09874	NIP; aquaporin NIP	A09180 Brite Hierarchies	B 09183 Protein families: signaling and cellular processes	C 02000 Transporters [BR:ko02000]	2.4972	8.1126e-07
Sobic.009G090000	K16297	SCPL-II; serine carboxypeptidase-like clade II [EC:3.4.16.-]	A09180 Brite Hierarchies	B 09181 Protein families: metabolism	C 01002 Peptidases and inhibitors [BR:ko01002]	2.05591	0.00017939
Sobic.009G125600	K18999	CPL3_4; RNA polymerase II C-terminal domain phosphatase-like 3/4 [EC:3.1.3.16]	A09180 Brite Hierarchies	B 09181 Protein families: metabolism	C 01009 Protein phosphatases and associated proteins [BR:ko01009]	2.56456	0.000174564
Sobic.009G130900	K10767	ALKBH5; mRNA N6-methyladenine demethylase [EC:1.14.11.53]	A09180 Brite Hierarchies	B 09182 Protein families: genetic information processing	C 03019 Messenger RNA biogenesis [BR:ko03019]	2.10644	9.30376e-06
Sobic.009G144600	K00430	E1.11.1.7; peroxidase [EC:1.11.1.7]	A09100 Metabolism	B 09110 Biosynthesis of other secondary metabolites	C 00940 Phenylpropanoid biosynthesis [PATH:ko00940]	8.96171	4.80354e-10
Sobic.009G210300	K06268	PPP3R, CNB; serine/threonine-protein phosphatase 2B regulatory subunit	A09130 Environmental Information Processing	B 09132 Signal transduction	C 04010 MAPK signaling pathway [PATH:ko04010]	3.20101	6.46441e-07
Sobic.009G009300	K15803	GERD; (-)-germacrene D synthase [EC:4.2.3.75]	A09100 Metabolism	B 09109 Metabolism of terpenoids and polyketides	C 00909 Sesquiterpenoid and triterpenoid biosynthesis [PATH:ko00909]	2.43166	1.55396e-06
Sobic.009G043500	K00387	SUOX; sulfite oxidase [EC:1.8.3.1]	A09100 Metabolism	B 09102 Energy metabolism	C 00920 Sulfur metabolism [PATH:ko00920]	5.39895	2.88896e-15
Sobic.009G203700	K14484	IAA; auxin-responsive protein IAA	A09130 Environmental Information Processing	B 09132 Signal transduction	C 04075 Plant hormone signal transduction [PATH:ko04075]	6.43208	1.9292e-18
Sobic.009G144700	K00430	E1.11.1.7; peroxidase [EC:1.11.1.7]	A09100 Metabolism	B 09110 Biosynthesis of other secondary metabolites	C 00940 Phenylpropanoid biosynthesis [PATH:ko00940]	8.82872	2.04881e-09
Sobic.009G090100	K16297	SCPL-II; serine carboxypeptidase-like clade II [EC:3.4.16.-]	A09180 Brite Hierarchies	B 09181 Protein families: metabolism	C 01002 Peptidases and inhibitors [BR:ko01002]	2.77041	1.32884e-07
Sobic.009G171600	K13424	WRKY33; WRKY transcription factor 33	A09130 Environmental Information Processing	B 09132 Signal transduction	C 04016 MAPK signaling pathway - plant [PATH:ko04016]	7.12961	0.000499811
Sobic.009G071800	K00850	pfkA, PFK; 6-phosphofructokinase 1 [EC:2.7.1.11]	A09100 Metabolism	B 09101 Carbohydrate metabolism	C 00010 Glycolysis / Gluconeogenesis [PATH:ko00010]	4.4355	2.84965e-06
Sobic.009G254900	K22522	LOG; cytokinin riboside 5'-monophosphate phosphoribohydrolase [EC:3.2.2.-]	A09180 Brite Hierarchies	B 09191 Unclassified: metabolism	C 99980 Enzymes with EC numbers	2.27246	0.0367003
Sobic.009G017732	K21888	DHAR; glutathione dehydrogenase/transferase [EC:1.8.5.1 2.5.1.18]	A09100 Metabolism	B 09101 Carbohydrate metabolism	C 00053 Ascorbate and aldarate metabolism [PATH:ko00053]	2.78554	0.000203813
Sobic.009G123700	K00858	ppnK, NADK; NAD+ kinase [EC:2.7.1.23]	A09100 Metabolism	B 09108 Metabolism of cofactors and vitamins	C 00760 Nicotinate and nicotinamide metabolism [PATH:ko00760]	3.17649	0.0468143
Sobic.009G217500	K20716	MAPKKK17_18; mitogen-activated protein kinase kinase kinase 17/18	A09130 Environmental Information Processing	B 09132 Signal transduction	C 04016 MAPK signaling pathway - plant [PATH:ko04016]	6.34859	0.0172452
Sobic.009G235600	K03444	ERD6, ESL1; MFS transporter, SP family, ERD6-like sugar transporter	A09180 Brite Hierarchies	B 09183 Protein families: signaling and cellular processes	C 02000 Transporters [BR:ko02000]	3.38938	4.13709e-11
Sobic.009G069500	K14490	AHP; histidine-containing phosphotransfer peotein	A09130 Environmental Information Processing	B 09132 Signal transduction	C 04075 Plant hormone signal transduction [PATH:ko04075]	2.59132	3.98457e-07
Sobic.009G168700	K03320	amt, AMT, MEP; ammonium transporter, Amt family	A09180 Brite Hierarchies	B 09183 Protein families: signaling and cellular processes	C 02000 Transporters [BR:ko02000]	2.13398	1.7638e-05
Sobic.009G043700	K00799	GST, gst; glutathione S-transferase [EC:2.5.1.18]	A09100 Metabolism	B 09106 Metabolism of other amino acids	C 00480 Glutathione metabolism [PATH:ko00480]	2.89573	9.54998e-08
Sobic.009G241000	K15397	KCS; 3-ketoacyl-CoA synthase [EC:2.3.1.199]	A09100 Metabolism	B 09103 Lipid metabolism	C 00062 Fatty acid elongation [PATH:ko00062]	7.40345	0.000150638
Sobic.K044300.1.	K10798	PARP2_3_4; poly [ADP-ribose] polymerase 2/3/4 [EC:2.4.2.30]	A09120 Genetic Information Processing	B 09124 Replication and repair	C 03410 Base excision repair [PATH:ko03410]	#N/A	#N/A
Sobic.005G135800	K00660	CHS; chalcone synthase [EC:2.3.1.74]	A09100 Metabolism	B 09110 Biosynthesis of other secondary metabolites	C 00941 Flavonoid biosynthesis [PATH:ko00941]	2.14185	0.00225729
Sobic.005G018200	K14641	APY; apyrase [EC:3.6.1.5]	A09100 Metabolism	B 09104 Nucleotide metabolism	C 00230 Purine metabolism [PATH:ko00230]	4.02485	2.13024e-12
Sobic.005G055300	K08081	TR1; tropinone reductase I [EC:1.1.1.206]	A09100 Metabolism	B 09110 Biosynthesis of other secondary metabolites	C 00960 Tropane, piperidine and pyridine alkaloid biosynthesis [PATH:ko00960]	3.82103	2.76766e-07
Sobic.005G102100	K00660	CHS; chalcone synthase [EC:2.3.1.74]	A09100 Metabolism	B 09110 Biosynthesis of other secondary metabolites	C 00941 Flavonoid biosynthesis [PATH:ko00941]	3.27521	1.02626e-10
Sobic.005G037000	K20624	CYP94C1; 12-hydroxyjasmonoyl-L-amino acid 12-hydroxylase / fatty acid hydroxylase [EC:1.14.14.49]	A09180 Brite Hierarchies	B 09181 Protein families: metabolism	C 00199 Cytochrome P450 [BR:ko00199]	6.69272	0.0043009
Sobic.005G172900	K08237	E2.4.1.218; hydroquinone glucosyltransferase [EC:2.4.1.218]	A09180 Brite Hierarchies	B 09181 Protein families: metabolism	C 01003 Glycosyltransferases [BR:ko01003]	2.62564	3.67822e-08
Sobic.005G200300	K00815	TAT; tyrosine aminotransferase [EC:2.6.1.5]	A09100 Metabolism	B 09105 Amino acid metabolism	C 00270 Cysteine and methionine metabolism [PATH:ko00270]	2.79963	0.0102274
Sobic.005G099500	K14641	APY; apyrase [EC:3.6.1.5]	A09100 Metabolism	B 09104 Nucleotide metabolism	C 00230 Purine metabolism [PATH:ko00230]	2.01278	0.00142318
Sobic.005G033801	K22772	FG2; flavonol-3-O-glucoside L-rhamnosyltransferase [EC:2.4.1.159]	A09100 Metabolism	B 09110 Biosynthesis of other secondary metabolites	C 00944 Flavone and flavonol biosynthesis [PATH:ko00944]	5.7066	0.116567
Sobic.005G136300	K00660	CHS; chalcone synthase [EC:2.3.1.74]	A09100 Metabolism	B 09110 Biosynthesis of other secondary metabolites	C 00941 Flavonoid biosynthesis [PATH:ko00941]	5.94423	1.72403e-15
Sobic.005G135300	K00660	CHS; chalcone synthase [EC:2.3.1.74]	A09100 Metabolism	B 09110 Biosynthesis of other secondary metabolites	C 00941 Flavonoid biosynthesis [PATH:ko00941]	2.03833	0.0085587
Sobic.005G088400	K09755	CYP84A, F5H; ferulate-5-hydroxylase [EC:1.14.-.-]	A09100 Metabolism	B 09110 Biosynthesis of other secondary metabolites	C 00940 Phenylpropanoid biosynthesis [PATH:ko00940]	10.0821	1.35519e-15
Sobic.005G162000	K05917	CYP51; sterol 14alpha-demethylase [EC:1.14.14.154 1.14.15.36]	A09100 Metabolism	B 09103 Lipid metabolism	C 00100 Steroid biosynthesis [PATH:ko00100]	2.50829	9.38555e-06
Sobic.005G132300	K05917	CYP51; sterol 14alpha-demethylase [EC:1.14.14.154 1.14.15.36]	A09100 Metabolism	B 09103 Lipid metabolism	C 00100 Steroid biosynthesis [PATH:ko00100]	6.69272	0.0043009
Sobic.005G206500	K03452	MHX; magnesium/proton exchanger	A09180 Brite Hierarchies	B 09183 Protein families: signaling and cellular processes	C 02000 Transporters [BR:ko02000]	2.74974	4.51853e-08
Sobic.005G208900	K11968	ARIH1; ariadne-1 [EC:2.3.2.31]	A09180 Brite Hierarchies	B 09182 Protein families: genetic information processing	C 04121 Ubiquitin system [BR:ko04121]	2.07325	5.5542e-05
Sobic.005G212700	K00799	GST, gst; glutathione S-transferase [EC:2.5.1.18]	A09100 Metabolism	B 09106 Metabolism of other amino acids	C 00480 Glutathione metabolism [PATH:ko00480]	6.47166	8.51195e-12
Sobic.005G131800	K03006	RPB1, POLR2A; DNA-directed RNA polymerase II subunit RPB1 [EC:2.7.7.6]	A09120 Genetic Information Processing	B 09121 Transcription	C 03020 RNA polymerase [PATH:ko03020]	6.06301	0.0447833
Sobic.005G137000	K00660	CHS; chalcone synthase [EC:2.3.1.74]	A09100 Metabolism	B 09110 Biosynthesis of other secondary metabolites	C 00941 Flavonoid biosynthesis [PATH:ko00941]	6.58687	0.00679855
Sobic.005G121200	K17279	REEP5_6; receptor expression-enhancing protein 5/6	A09180 Brite Hierarchies	B 09183 Protein families: signaling and cellular processes	C 04147 Exosome [BR:ko04147]	3.65983	1.37738e-12
Sobic.005G192100	K13457	RPM1, RPS3; disease resistance protein RPM1	A09150 Organismal Systems	B 09159 Environmental adaptation	0	5.82571	1.27001e-09
Sobic.005G136200	K00660	CHS; chalcone synthase [EC:2.3.1.74]	A09100 Metabolism	B 09110 Biosynthesis of other secondary metabolites	C 00941 Flavonoid biosynthesis [PATH:ko00941]	2.06102	1.35819e-05
Sobic.005G036500	K08286	E2.7.11.-; protein-serine/threonine kinase [EC:2.7.11.-]	A09180 Brite Hierarchies	B 09191 Unclassified: metabolism	C 99980 Enzymes with EC numbers	2.45476	2.05465e-06
Sobic.005G190800	K05928	E2.1.1.95; tocopherol O-methyltransferase [EC:2.1.1.95]	A09100 Metabolism	B 09108 Metabolism of cofactors and vitamins	C 00130 Ubiquinone and other terpenoid-quinone biosynthesis [PATH:ko00130]	2.77419	4.36561e-07
Sobic.005G195600	K00860	cysC; adenylylsulfate kinase [EC:2.7.1.25]	A09100 Metabolism	B 09102 Energy metabolism	C 00920 Sulfur metabolism [PATH:ko00920]	3.24181	4.91972e-11
Sobic.005G015600	K24544	CYP714C; cytochrome P450 family 714 subfamily C	A09180 Brite Hierarchies	B 09181 Protein families: metabolism	C 00199 Cytochrome P450 [BR:ko00199]	2.87205	0.000679827
Sobic.005G114000	K05389	KCNKF; potassium channel subfamily K, other eukaryote	A09180 Brite Hierarchies	B 09183 Protein families: signaling and cellular processes	C 04040 Ion channels [BR:ko04040]	3.51007	8.88034e-09
Sobic.005G063300	K13356	FAR; alcohol-forming fatty acyl-CoA reductase [EC:1.2.1.84]	A09100 Metabolism	B 09103 Lipid metabolism	C 00073 Cutin, suberine and wax biosynthesis [PATH:ko00073]	2.31909	4.6825e-05
Sobic.005G139700	K13447	RBOH; respiratory burst oxidase [EC:1.6.3.- 1.11.1.-]	A09130 Environmental Information Processing	B 09132 Signal transduction	C 04016 MAPK signaling pathway - plant [PATH:ko04016]	2.22194	3.69683e-06
Sobic.005G137300	K00660	CHS; chalcone synthase [EC:2.3.1.74]	A09100 Metabolism	B 09110 Biosynthesis of other secondary metabolites	C 00941 Flavonoid biosynthesis [PATH:ko00941]	2.03621	2.15771e-05
Sobic.008G000100	K18368	CSE; caffeoylshikimate esterase [EC:3.1.1.-]	A09100 Metabolism	B 09110 Biosynthesis of other secondary metabolites	C 00940 Phenylpropanoid biosynthesis [PATH:ko00940]	2.25926	1.64651e-05
Sobic.008G131400	K09422	MYBP; transcription factor MYB, plant	A09180 Brite Hierarchies	B 09182 Protein families: genetic information processing	C 03000 Transcription factors [BR:ko03000]	2.54283	0.000108363
Sobic.008G088803	K12183	TSG101, STP22, VPS23; ESCRT-I complex subunit TSG101	A09140 Cellular Processes	B 09141 Transport and catabolism	C 04144 Endocytosis [PATH:ko04144]	4.76931	8.89715e-12
Sobic.008G049000	K22848	DGAT2; diacylglycerol O-acyltransferase 2, plant [EC:2.3.1.20]	A09100 Metabolism	B 09103 Lipid metabolism	C 00561 Glycerolipid metabolism [PATH:ko00561]	9.10279	1.24662e-10
Sobic.008G174200	K13457	RPM1, RPS3; disease resistance protein RPM1	A09150 Organismal Systems	B 09159 Environmental adaptation	0	2.04183	7.91758e-05
Sobic.008G079300	K00799	GST, gst; glutathione S-transferase [EC:2.5.1.18]	A09100 Metabolism	B 09106 Metabolism of other amino acids	C 00480 Glutathione metabolism [PATH:ko00480]	2.01643	4.1638e-05
Sobic.008G037000	K22390	ACP7; acid phosphatase type 7	A09180 Brite Hierarchies	B 09191 Unclassified: metabolism	C 99999 Others	6.97036	0.00115619
Sobic.008G066000	K08818	CDC2L; cell division cycle 2-like [EC:2.7.11.22]	A09180 Brite Hierarchies	B 09181 Protein families: metabolism	C 01001 Protein kinases [BR:ko01001]	3.74947	1.24239e-07
Sobic.008G171600	K03327	TC.MATE, SLC47A, norM, mdtK, dinF; multidrug resistance protein, MATE family	A09180 Brite Hierarchies	B 09183 Protein families: signaling and cellular processes	C 02000 Transporters [BR:ko02000]	9.45836	2.63778e-12
Sobic.008G190900	K19222	menI, DHNAT; 1,4-dihydroxy-2-naphthoyl-CoA hydrolase [EC:3.1.2.28]	A09100 Metabolism	B 09108 Metabolism of cofactors and vitamins	C 00130 Ubiquinone and other terpenoid-quinone biosynthesis [PATH:ko00130]	2.40905	4.31781e-06
Sobic.008G030200	K19040	ATL76S; E3 ubiquitin-protein ligase ATL10/75/76/77/78 [EC:2.3.2.27]	A09180 Brite Hierarchies	B 09182 Protein families: genetic information processing	C 04121 Ubiquitin system [BR:ko04121]	2.42635	6.95847e-07
Sobic.008G059400	K24917	AAP; amino acid permease	A09180 Brite Hierarchies	B 09183 Protein families: signaling and cellular processes	C 02000 Transporters [BR:ko02000]	2.53533	7.64897e-07
Sobic.008G015600	K13412	CPK; calcium-dependent protein kinase [EC:2.7.11.1]	A09150 Organismal Systems	B 09159 Environmental adaptation	0	5.66555	5.97228e-09
Sobic.008G055700	K09422	MYBP; transcription factor MYB, plant	A09180 Brite Hierarchies	B 09182 Protein families: genetic information processing	C 03000 Transcription factors [BR:ko03000]	6.34859	0.0172452
Sobic.008G076200	K15404	K15404, CER1; aldehyde decarbonylase [EC:4.1.99.5]	A09100 Metabolism	B 09103 Lipid metabolism	C 00073 Cutin, suberine and wax biosynthesis [PATH:ko00073]	2.1899	0.00331055
Sobic.008G159701	K22698	SEY1; protein SEY1 [EC:3.6.5.-]	A09180 Brite Hierarchies	B 09182 Protein families: genetic information processing	C 04131 Membrane trafficking [BR:ko04131]	3.23052	1.0792e-06
Sobic.008G136500	K20623	CYP92A6; typhasterol/6-deoxotyphasterol 2alpha-hydroxylase	A09100 Metabolism	B 09109 Metabolism of terpenoids and polyketides	C 00905 Brassinosteroid biosynthesis [PATH:ko00905]	3.42141	4.55688e-05
Sobic.008G171000	K12502	VTE3, APG1; MPBQ/MSBQ methyltransferase [EC:2.1.1.295]	A09100 Metabolism	B 09108 Metabolism of cofactors and vitamins	C 00130 Ubiquinone and other terpenoid-quinone biosynthesis [PATH:ko00130]	3.4801	1.31472e-12
Sobic.004G085600	K16241	HY5; transcription factor HY5	A09150 Organismal Systems	B 09159 Environmental adaptation	0	2.44175	7.51882e-07
Sobic.004G105800	K00430	E1.11.1.7; peroxidase [EC:1.11.1.7]	A09100 Metabolism	B 09110 Biosynthesis of other secondary metabolites	C 00940 Phenylpropanoid biosynthesis [PATH:ko00940]	5.9352	2.75939e-24
Sobic.004G346000	K15747	LUT5, CYP97A3; beta-ring hydroxylase [EC:1.14.-.-]	A09100 Metabolism	B 09109 Metabolism of terpenoids and polyketides	C 00906 Carotenoid biosynthesis [PATH:ko00906]	3.16257	1.02821e-10
Sobic.004G220700	K10775	PAL; phenylalanine ammonia-lyase [EC:4.3.1.24]	A09100 Metabolism	B 09105 Amino acid metabolism	C 00360 Phenylalanine metabolism [PATH:ko00360]	2.94722	9.70385e-08
Sobic.004G064400	K22314	GGP; glucosinolate gamma-glutamyl hydrolase [EC:3.4.19.16]	A09180 Brite Hierarchies	B 09191 Unclassified: metabolism	C 99980 Enzymes with EC numbers	3.21467	5.98163e-10
Sobic.004G348400	K24028	DMR6, DLO; salicylic acid 3-hydroxylase [EC:1.14.11.-]	A09180 Brite Hierarchies	B 09191 Unclassified: metabolism	C 99980 Enzymes with EC numbers	2.50067	6.3013e-06
Sobic.004G188800	K24193	STP; MFS transporter, SP family, sugar:H+ symporter	A09180 Brite Hierarchies	B 09183 Protein families: signaling and cellular processes	C 02000 Transporters [BR:ko02000]	2.82672	1.18199e-07
Sobic.004G236000	K05909	E1.10.3.2; laccase [EC:1.10.3.2]	A09180 Brite Hierarchies	B 09191 Unclassified: metabolism	C 99980 Enzymes with EC numbers	8.91872	7.6817e-10
Sobic.004G144200	K13356	FAR; alcohol-forming fatty acyl-CoA reductase [EC:1.2.1.84]	A09100 Metabolism	B 09103 Lipid metabolism	C 00073 Cutin, suberine and wax biosynthesis [PATH:ko00073]	2.00719	0.000158723
Sobic.004G201100	K05280	CYP75B1; flavonoid 3'-monooxygenase [EC:1.14.14.82]	A09100 Metabolism	B 09110 Biosynthesis of other secondary metabolites	C 00941 Flavonoid biosynthesis [PATH:ko00941]	2.92506	1.49145e-07
Sobic.004G078800	K14431	TGA; transcription factor TGA	A09130 Environmental Information Processing	B 09132 Signal transduction	C 04075 Plant hormone signal transduction [PATH:ko04075]	3.63028	4.35023e-08
Sobic.004G004500	K00016	LDH, ldh; L-lactate dehydrogenase [EC:1.1.1.27]	A09100 Metabolism	B 09101 Carbohydrate metabolism	C 00010 Glycolysis / Gluconeogenesis [PATH:ko00010]	5.7066	0.116567
Sobic.004G329700	K18999	CPL3_4; RNA polymerase II C-terminal domain phosphatase-like 3/4 [EC:3.1.3.16]	A09180 Brite Hierarchies	B 09181 Protein families: metabolism	C 01009 Protein phosphatases and associated proteins [BR:ko01009]	3.42141	4.55688e-05
Sobic.004G159400	K07766	E3.6.1.52; diphosphoinositol-polyphosphate diphosphatase [EC:3.6.1.52]	A09180 Brite Hierarchies	B 09191 Unclassified: metabolism	C 99980 Enzymes with EC numbers	2.3807	4.86599e-05
Sobic.004G213100	K03098	APOD; apolipoprotein D and lipocalin family protein	A09180 Brite Hierarchies	B 09183 Protein families: signaling and cellular processes	C 04147 Exosome [BR:ko04147]	2.02084	2.08252e-05
Sobic.004G180500	K05894	OPR; 12-oxophytodienoic acid reductase [EC:1.3.1.42]	A09100 Metabolism	B 09103 Lipid metabolism	C 00592 alpha-Linolenic acid metabolism [PATH:ko00592]	3.19839	2.45101e-07
Sobic.004G304000	K15095	E1.1.1.208; (+)-neomenthol dehydrogenase [EC:1.1.1.208]	A09100 Metabolism	B 09109 Metabolism of terpenoids and polyketides	C 00902 Monoterpenoid biosynthesis [PATH:ko00902]	2.59807	1.05037e-05
Sobic.004G279200	K01102	PDP; pyruvate dehydrogenase phosphatase [EC:3.1.3.43]	A09180 Brite Hierarchies	B 09181 Protein families: metabolism	C 01009 Protein phosphatases and associated proteins [BR:ko01009]	4.07315	1.17775e-11
Sobic.004G064500	K22314	GGP; glucosinolate gamma-glutamyl hydrolase [EC:3.4.19.16]	A09180 Brite Hierarchies	B 09191 Unclassified: metabolism	C 99980 Enzymes with EC numbers	5.89578	0.0722761
Sobic.004G036400	K07300	chaA, CAX; Ca2+:H+ antiporter	A09180 Brite Hierarchies	B 09183 Protein families: signaling and cellular processes	C 02000 Transporters [BR:ko02000]	6.34859	0.0172452
Sobic.004G038300	K01853	CAS1; cycloartenol synthase [EC:5.4.99.8]	A09100 Metabolism	B 09103 Lipid metabolism	C 00100 Steroid biosynthesis [PATH:ko00100]	2.03394	2.17472e-05
Sobic.004G332800	K10268	FBXL2_20; F-box and leucine-rich repeat protein 2/20	A09180 Brite Hierarchies	B 09182 Protein families: genetic information processing	C 04121 Ubiquitin system [BR:ko04121]	2.70785	2.67313e-08
Sobic.004G182300	K08472	MLO; mlo protein	A09180 Brite Hierarchies	B 09183 Protein families: signaling and cellular processes	C 04030 G protein-coupled receptors [BR:ko04030]	3.79161	4.1257e-11
Sobic.004G312500	K10534	NR; nitrate reductase (NAD(P)H) [EC:1.7.1.1 1.7.1.2 1.7.1.3]	A09100 Metabolism	B 09102 Energy metabolism	C 00910 Nitrogen metabolism [PATH:ko00910]	5.09342	3.05381e-18
Sobic.004G332600	K10268	FBXL2_20; F-box and leucine-rich repeat protein 2/20	A09180 Brite Hierarchies	B 09182 Protein families: genetic information processing	C 04121 Ubiquitin system [BR:ko04121]	3.35856	0.00140557
Sobic.004G303800	K15095	E1.1.1.208; (+)-neomenthol dehydrogenase [EC:1.1.1.208]	A09100 Metabolism	B 09109 Metabolism of terpenoids and polyketides	C 00902 Monoterpenoid biosynthesis [PATH:ko00902]	7.9646	3.82591e-06
Sobic.004G095500	K20771	CYP711A1; carlactone C-19 oxidase [EC:1.14.-.-]	A09180 Brite Hierarchies	B 09181 Protein families: metabolism	C 00199 Cytochrome P450 [BR:ko00199]	2.83077	2.75343e-08
Sobic.004G191200	K08901	psbQ; photosystem II oxygen-evolving enhancer protein 3	A09100 Metabolism	B 09102 Energy metabolism	C 00195 Photosynthesis [PATH:ko00195]	2.07066	1.45502e-05
Sobic.004G217800	K03320	amt, AMT, MEP; ammonium transporter, Amt family	A09180 Brite Hierarchies	B 09183 Protein families: signaling and cellular processes	C 02000 Transporters [BR:ko02000]	3.38507	5.17209e-10
Sobic.004G144150	K13356	FAR; alcohol-forming fatty acyl-CoA reductase [EC:1.2.1.84]	A09100 Metabolism	B 09103 Lipid metabolism	C 00073 Cutin, suberine and wax biosynthesis [PATH:ko00073]	4.18069	3.0767e-11
Sobic.004G159100	K20870	IRX10; putative beta-1,4-xylosyltransferase IRX10 [EC:2.4.2.-]	A09180 Brite Hierarchies	B 09181 Protein families: metabolism	C 01003 Glycosyltransferases [BR:ko01003]	2.93022	8.70715e-06
Sobic.004G330900	K14491	ARR-B; two-component response regulator ARR-B family	A09130 Environmental Information Processing	B 09132 Signal transduction	C 04075 Plant hormone signal transduction [PATH:ko04075]	2.05254	2.15355e-05
Sobic.004G101400	K09419	HSFF; heat shock transcription factor, other eukaryote	A09180 Brite Hierarchies	B 09182 Protein families: genetic information processing	C 03000 Transcription factors [BR:ko03000]	8.30219	2.11135e-07
Sobic.004G086400	K15639	CYP734A1, BAS1; PHYB activation tagged suppressor 1 [EC:1.14.-.-]	A09100 Metabolism	B 09109 Metabolism of terpenoids and polyketides	C 00905 Brassinosteroid biosynthesis [PATH:ko00905]	6.79132	0.00276094
Sobic.004G008000	K14565	NOP58; nucleolar protein 58	A09120 Genetic Information Processing	B 09122 Translation	C 03008 Ribosome biogenesis in eukaryotes [PATH:ko03008]	2.15305	0.000536404
Sobic.004G273800	K09422	MYBP; transcription factor MYB, plant	A09180 Brite Hierarchies	B 09182 Protein families: genetic information processing	C 03000 Transcription factors [BR:ko03000]	2.47047	1.94636e-05
Sobic.004G218700	K17756	FAO3; long-chain-alcohol oxidase [EC:1.1.3.20]	A09180 Brite Hierarchies	B 09191 Unclassified: metabolism	C 99980 Enzymes with EC numbers	2.50509	4.19951e-05
Sobic.004G272700	K01904	4CL; 4-coumarate--CoA ligase [EC:6.2.1.12]	A09100 Metabolism	B 09108 Metabolism of cofactors and vitamins	C 00130 Ubiquinone and other terpenoid-quinone biosynthesis [PATH:ko00130]	2.14549	1.34978e-05
Sobic.004G130600	K06268	PPP3R, CNB; serine/threonine-protein phosphatase 2B regulatory subunit	A09130 Environmental Information Processing	B 09132 Signal transduction	C 04010 MAPK signaling pathway [PATH:ko04010]	3.38621	8.55719e-09
Sobic.004G256800	K24917	AAP; amino acid permease	A09180 Brite Hierarchies	B 09183 Protein families: signaling and cellular processes	C 02000 Transporters [BR:ko02000]	3.04958	2.52234e-09
Sobic.004G176900	K04421	MAP3K3, MEKK3; mitogen-activated protein kinase kinase kinase 3 [EC:2.7.11.25]	A09130 Environmental Information Processing	B 09132 Signal transduction	C 04010 MAPK signaling pathway [PATH:ko04010]	2.65809	0.00044505
Sobic.004G220600	K10775	PAL; phenylalanine ammonia-lyase [EC:4.3.1.24]	A09100 Metabolism	B 09105 Amino acid metabolism	C 00360 Phenylalanine metabolism [PATH:ko00360]	6.88362	0.00177936
Sobic.004G310100	K05278	FLS; flavonol synthase [EC:1.14.20.6]	A09100 Metabolism	B 09110 Biosynthesis of other secondary metabolites	C 00941 Flavonoid biosynthesis [PATH:ko00941]	2.22192	0.00162695
Sobic.004G185100	K03809	wrbA; NAD(P)H dehydrogenase (quinone) [EC:1.6.5.2]	A09100 Metabolism	B 09108 Metabolism of cofactors and vitamins	C 00130 Ubiquinone and other terpenoid-quinone biosynthesis [PATH:ko00130]	6.97036	0.00115619
Sobic.004G241600	K24127	MAGE; melanoma-associated antigen	A09180 Brite Hierarchies	B 09183 Protein families: signaling and cellular processes	C 04990 Domain-containing proteins not elsewhere classified [BR:ko04990]	3.17837	3.08019e-07
Sobic.007G194800	K01052	LIPA; lysosomal acid lipase/cholesteryl ester hydrolase [EC:3.1.1.13]	A09100 Metabolism	B 09103 Lipid metabolism	C 00100 Steroid biosynthesis [PATH:ko00100]	3.25741	4.32771e-07
Sobic.007G152300	K09338	HD-ZIP; homeobox-leucine zipper protein	A09180 Brite Hierarchies	B 09182 Protein families: genetic information processing	C 03000 Transcription factors [BR:ko03000]	4.22302	5.08156e-09
Sobic.007G052000	K10666	RNF5; E3 ubiquitin-protein ligase RNF5 [EC:2.3.2.27]	A09120 Genetic Information Processing	B 09123 Folding, sorting and degradation	C 04141 Protein processing in endoplasmic reticulum [PATH:ko04141]	3.4872	6.38821e-06
Sobic.007G043100	K01853	CAS1; cycloartenol synthase [EC:5.4.99.8]	A09100 Metabolism	B 09103 Lipid metabolism	C 00100 Steroid biosynthesis [PATH:ko00100]	3.1434	8.35986e-10
Sobic.007G226600	K09338	HD-ZIP; homeobox-leucine zipper protein	A09180 Brite Hierarchies	B 09182 Protein families: genetic information processing	C 03000 Transcription factors [BR:ko03000]	2.17259	5.28209e-06
Sobic.007G171600	K01517	ADPRM; manganese-dependent ADP-ribose/CDP-alcohol diphosphatase [EC:3.6.1.13 3.6.1.16 3.6.1.53]	A09100 Metabolism	B 09103 Lipid metabolism	C 00564 Glycerophospholipid metabolism [PATH:ko00564]	2.88005	7.61756e-09
Sobic.007G090472	K01853	CAS1; cycloartenol synthase [EC:5.4.99.8]	A09100 Metabolism	B 09103 Lipid metabolism	C 00100 Steroid biosynthesis [PATH:ko00100]	7.4645	0.000101063
Sobic.007G198800	K10523	SPOP; speckle-type POZ protein	A09130 Environmental Information Processing	B 09132 Signal transduction	C 04340 Hedgehog signaling pathway [PATH:ko04340]	2.26191	0.00524694
Sobic.007G207100	K02982	RP-S3, rpsC; small subunit ribosomal protein S3	A09120 Genetic Information Processing	B 09122 Translation	C 03010 Ribosome [PATH:ko03010]	7.73611	1.54529e-05
Sobic.007G009300	K14484	IAA; auxin-responsive protein IAA	A09130 Environmental Information Processing	B 09132 Signal transduction	C 04075 Plant hormone signal transduction [PATH:ko04075]	2.03026	0.00112224
Sobic.007G213200	K14638	SLC15A3_4, PHT; solute carrier family 15 (peptide/histidine transporter), member 3/4	A09180 Brite Hierarchies	B 09183 Protein families: signaling and cellular processes	C 02000 Transporters [BR:ko02000]	2.08516	0.000676564
Sobic.007G209300	K22825	NSMCE4, NSE4; non-structural maintenance of chromosomes element 4	A09180 Brite Hierarchies	B 09182 Protein families: genetic information processing	C 03400 DNA repair and recombination proteins [BR:ko03400]	3.05217	0.00253368
Sobic.007G154800	K01674	cah; carbonic anhydrase [EC:4.2.1.1]	A09100 Metabolism	B 09102 Energy metabolism	C 00910 Nitrogen metabolism [PATH:ko00910]	3.01891	7.21116e-10
Sobic.007G114700	K15032	MTERFD; mTERF domain-containing protein, mitochondrial	A09180 Brite Hierarchies	B 09182 Protein families: genetic information processing	C 03012 Translation factors [BR:ko03012]	2.20059	0.00189316
Sobic.007G201100	K22285	OSBPL8, ORP8; oxysterol-binding protein-related protein 8	A09180 Brite Hierarchies	B 09182 Protein families: genetic information processing	C 04131 Membrane trafficking [BR:ko04131]	3.25741	4.32771e-07
Sobic.007G170800	K13356	FAR; alcohol-forming fatty acyl-CoA reductase [EC:1.2.1.84]	A09100 Metabolism	B 09103 Lipid metabolism	C 00073 Cutin, suberine and wax biosynthesis [PATH:ko00073]	4.83996	3.16852e-19
Sobic.007G037800	K10523	SPOP; speckle-type POZ protein	A09130 Environmental Information Processing	B 09132 Signal transduction	C 04340 Hedgehog signaling pathway [PATH:ko04340]	5.7066	0.116567
Sobic.007G056400	K02149	ATPeV1D, ATP6M; V-type H+-transporting ATPase subunit D	A09100 Metabolism	B 09102 Energy metabolism	C 00190 Oxidative phosphorylation [PATH:ko00190]	3.92797	7.85979e-06
Sobic.007G068700	K00422	E1.10.3.1; polyphenol oxidase [EC:1.10.3.1]	A09100 Metabolism	B 09105 Amino acid metabolism	C 00350 Tyrosine metabolism [PATH:ko00350]	7.12961	0.000499811
Sobic.007G142100	K13065	E2.3.1.133, HCT; shikimate O-hydroxycinnamoyltransferase [EC:2.3.1.133]	A09100 Metabolism	B 09110 Biosynthesis of other secondary metabolites	C 00940 Phenylpropanoid biosynthesis [PATH:ko00940]	3.36111	1.28156e-09
Sobic.007G059100	K13066	COMT; caffeic acid 3-O-methyltransferase / acetylserotonin O-methyltransferase [EC:2.1.1.68 2.1.1.4]	A09100 Metabolism	B 09105 Amino acid metabolism	C 00380 Tryptophan metabolism [PATH:ko00380]	6.21286	0.0277297
Sobic.007G141500	K01850	E5.4.99.5; chorismate mutase [EC:5.4.99.5]	A09100 Metabolism	B 09105 Amino acid metabolism	C 00400 Phenylalanine, tyrosine and tryptophan biosynthesis [PATH:ko00400]	2.59577	0.000404189
Sobic.007G220000	K10523	SPOP; speckle-type POZ protein	A09130 Environmental Information Processing	B 09132 Signal transduction	C 04340 Hedgehog signaling pathway [PATH:ko04340]	2.79437	5.31978e-09
Sobic.007G204600	K01214	ISA, treX; isoamylase [EC:3.2.1.68]	A09100 Metabolism	B 09101 Carbohydrate metabolism	C 00500 Starch and sucrose metabolism [PATH:ko00500]	3.78967	1.26296e-13
Sobic.007G087400	K24917	AAP; amino acid permease	A09180 Brite Hierarchies	B 09183 Protein families: signaling and cellular processes	C 02000 Transporters [BR:ko02000]	2.75645	7.70277e-06
Sobic.007G170400	K00660	CHS; chalcone synthase [EC:2.3.1.74]	A09100 Metabolism	B 09110 Biosynthesis of other secondary metabolites	C 00941 Flavonoid biosynthesis [PATH:ko00941]	4.43821	2.27414e-18
Sobic.001G508800	K01177	E3.2.1.2; beta-amylase [EC:3.2.1.2]	A09100 Metabolism	B 09101 Carbohydrate metabolism	C 00500 Starch and sucrose metabolism [PATH:ko00500]	2.76276	1.04941e-08
Sobic.001G366500	K24188	CYP93A; cytochrome P450 family 93 subfamily A [EC:1.14.-.-]	A09180 Brite Hierarchies	B 09181 Protein families: metabolism	C 00199 Cytochrome P450 [BR:ko00199]	2.20492	4.1927e-06
Sobic.001G263900	K00001	E1.1.1.1, adh; alcohol dehydrogenase [EC:1.1.1.1]	A09100 Metabolism	B 09101 Carbohydrate metabolism	C 00010 Glycolysis / Gluconeogenesis [PATH:ko00010]	2.02528	3.06156e-05
Sobic.001G304700	K00318	PRODH, fadM, putB; proline dehydrogenase [EC:1.5.5.2]	A09100 Metabolism	B 09105 Amino acid metabolism	C 00330 Arginine and proline metabolism [PATH:ko00330]	2.98668	1.01186e-09
Sobic.001G243300	K08099	E3.1.1.14; chlorophyllase [EC:3.1.1.14]	A09100 Metabolism	B 09108 Metabolism of cofactors and vitamins	C 00860 Porphyrin and chlorophyll metabolism [PATH:ko00860]	3.42164	3.85775e-12
Sobic.001G379000	K00827	AGXT2; alanine-glyoxylate transaminase / (R)-3-amino-2-methylpropionate-pyruvate transaminase [EC:2.6.1.44 2.6.1.40]	A09100 Metabolism	B 09105 Amino acid metabolism	C 00250 Alanine, aspartate and glutamate metabolism [PATH:ko00250]	2.70224	5.33699e-06
Sobic.001G118700	K00794	ribH, RIB4; 6,7-dimethyl-8-ribityllumazine synthase [EC:2.5.1.78]	A09100 Metabolism	B 09108 Metabolism of cofactors and vitamins	C 00740 Riboflavin metabolism [PATH:ko00740]	2.26857	0.00337585
Sobic.001G284600	K08235	E2.4.1.207; xyloglucan:xyloglucosyl transferase [EC:2.4.1.207]	A09180 Brite Hierarchies	B 09191 Unclassified: metabolism	C 99980 Enzymes with EC numbers	2.60002	1.15388e-07
Sobic.001G046500	K00559	SMT1, ERG6; sterol 24-C-methyltransferase [EC:2.1.1.41]	A09100 Metabolism	B 09103 Lipid metabolism	C 00100 Steroid biosynthesis [PATH:ko00100]	2.03664	0.01126
Sobic.001G168500	K13963	SERPINB; serpin B	A09160 Human Diseases	B 09174 Infectious disease: parasitic	C 05146 Amoebiasis [PATH:ko05146]	2.56214	0.00021374
Sobic.001G449100	K20858	MCU; calcium uniporter protein, mitochondrial	A09130 Environmental Information Processing	B 09132 Signal transduction	C 04020 Calcium signaling pathway [PATH:ko04020]	11.6695	6.68503e-24
Sobic.001G280000	K16296	SCPL-I; serine carboxypeptidase-like clade I [EC:3.4.16.-]	A09180 Brite Hierarchies	B 09181 Protein families: metabolism	C 01002 Peptidases and inhibitors [BR:ko01002]	3.33382	2.27463e-10
Sobic.001G216500	K07192	FLOT; flotillin	A09150 Organismal Systems	B 09152 Endocrine system	0	7.52307	6.84272e-05
Sobic.001G447500	K00826	E2.6.1.42, ilvE; branched-chain amino acid aminotransferase [EC:2.6.1.42]	A09100 Metabolism	B 09105 Amino acid metabolism	C 00270 Cysteine and methionine metabolism [PATH:ko00270]	3.61889	3.61088e-13
Sobic.001G317200	K00799	GST, gst; glutathione S-transferase [EC:2.5.1.18]	A09100 Metabolism	B 09106 Metabolism of other amino acids	C 00480 Glutathione metabolism [PATH:ko00480]	2.45834	0.00183118
Sobic.001G062300	K09842	AAO3; abscisic-aldehyde oxidase [EC:1.2.3.14]	A09100 Metabolism	B 09109 Metabolism of terpenoids and polyketides	C 00906 Carotenoid biosynthesis [PATH:ko00906]	2.0359	2.01496e-05
Sobic.001G343300	K23558	3BETAHSDD; plant 3beta-hydroxysteroid-4alpha-carboxylate 3-dehydrogenase [EC:1.1.1.418]	A09100 Metabolism	B 09103 Lipid metabolism	C 00100 Steroid biosynthesis [PATH:ko00100]	3.28395	8.85391e-11
Sobic.001G002500	K14516	ERF1; ethylene-responsive transcription factor 1	A09130 Environmental Information Processing	B 09132 Signal transduction	C 04016 MAPK signaling pathway - plant [PATH:ko04016]	6.34859	0.0172452
Sobic.001G195300	K24184	CYP89A; cytochrome P450 family 89 subfamily A [EC:1.14.-.-]	A09180 Brite Hierarchies	B 09181 Protein families: metabolism	C 00199 Cytochrome P450 [BR:ko00199]	4.19144	9.50954e-16
Sobic.001G027800	K19355	MAN; mannan endo-1,4-beta-mannosidase [EC:3.2.1.78]	A09100 Metabolism	B 09101 Carbohydrate metabolism	C 00051 Fructose and mannose metabolism [PATH:ko00051]	2.35758	0.00186569
Sobic.001G137900	K24184	CYP89A; cytochrome P450 family 89 subfamily A [EC:1.14.-.-]	A09180 Brite Hierarchies	B 09181 Protein families: metabolism	C 00199 Cytochrome P450 [BR:ko00199]	8.46041	6.62734e-08
Sobic.001G397900	K09422	MYBP; transcription factor MYB, plant	A09180 Brite Hierarchies	B 09182 Protein families: genetic information processing	C 03000 Transcription factors [BR:ko03000]	7.25563	4.421e-16
Sobic.001G474200	K07893	RAB6A; Ras-related protein Rab-6A	A09180 Brite Hierarchies	B 09182 Protein families: genetic information processing	C 04131 Membrane trafficking [BR:ko04131]	2.9167	0.102855
Sobic.001G104900	K25380	EGY; zinc metalloprotease EGY, chloroplastic [EC:3.4.24.-]	A09180 Brite Hierarchies	B 09181 Protein families: metabolism	C 01002 Peptidases and inhibitors [BR:ko01002]	3.17649	0.0468143
Sobic.001G318200	K00799	GST, gst; glutathione S-transferase [EC:2.5.1.18]	A09100 Metabolism	B 09106 Metabolism of other amino acids	C 00480 Glutathione metabolism [PATH:ko00480]	5.15918	2.99729e-11
Sobic.001G146200	K14488	SAUR; SAUR family protein	A09130 Environmental Information Processing	B 09132 Signal transduction	C 04075 Plant hormone signal transduction [PATH:ko04075]	5.19392	5.17178e-07
Sobic.001G208800	K02977	RP-S27Ae, RPS27A, UBA80; ubiquitin-small subunit ribosomal protein S27Ae	A09120 Genetic Information Processing	B 09122 Translation	C 03010 Ribosome [PATH:ko03010]	6.06301	0.0447833
Sobic.001G530700	K15277	SLC35B3, PAPST2; solute carrier family 35 (adenosine 3'-phospho 5'-phosphosulfate transporter), member B3	A09180 Brite Hierarchies	B 09183 Protein families: signaling and cellular processes	C 02000 Transporters [BR:ko02000]	3.50061	7.05093e-10
Sobic.001G438000	K13993	HSP20; HSP20 family protein	A09120 Genetic Information Processing	B 09123 Folding, sorting and degradation	C 04141 Protein processing in endoplasmic reticulum [PATH:ko04141]	5.07142	1.59221e-06
Sobic.001G473900	K09286	EREBP; EREBP-like factor	A09180 Brite Hierarchies	B 09182 Protein families: genetic information processing	C 03000 Transcription factors [BR:ko03000]	7.73611	1.54529e-05
Sobic.001G185800	K03327	TC.MATE, SLC47A, norM, mdtK, dinF; multidrug resistance protein, MATE family	A09180 Brite Hierarchies	B 09183 Protein families: signaling and cellular processes	C 02000 Transporters [BR:ko02000]	3.34477	1.87814e-06
Sobic.001G255300	K01593	DDC, TDC; aromatic-L-amino-acid/L-tryptophan decarboxylase [EC:4.1.1.28 4.1.1.105]	A09100 Metabolism	B 09105 Amino acid metabolism	C 00350 Tyrosine metabolism [PATH:ko00350]	3.82471	3.21093e-12
Sobic.001G343400	K23558	3BETAHSDD; plant 3beta-hydroxysteroid-4alpha-carboxylate 3-dehydrogenase [EC:1.1.1.418]	A09100 Metabolism	B 09103 Lipid metabolism	C 00100 Steroid biosynthesis [PATH:ko00100]	2.47193	0.0595024
Sobic.001G510200	K10251	HSD17B12, KAR, IFA38; 17beta-estradiol 17-dehydrogenase / very-long-chain 3-oxoacyl-CoA reductase [EC:1.1.1.62 1.1.1.330]	A09100 Metabolism	B 09103 Lipid metabolism	C 00062 Fatty acid elongation [PATH:ko00062]	6.34859	0.0172452
Sobic.001G235800	K00430	E1.11.1.7; peroxidase [EC:1.11.1.7]	A09100 Metabolism	B 09110 Biosynthesis of other secondary metabolites	C 00940 Phenylpropanoid biosynthesis [PATH:ko00940]	7.52307	6.84272e-05
Sobic.001G384100	K15633	gpmI; 2,3-bisphosphoglycerate-independent phosphoglycerate mutase [EC:5.4.2.12]	A09100 Metabolism	B 09101 Carbohydrate metabolism	C 00010 Glycolysis / Gluconeogenesis [PATH:ko00010]	2.15267	0.00994415
Sobic.001G264700	K01802	E5.2.1.8; peptidylprolyl isomerase [EC:5.2.1.8]	A09180 Brite Hierarchies	B 09191 Unclassified: metabolism	C 99980 Enzymes with EC numbers	2.59549	3.2696e-05
Sobic.001G046700	K00559	SMT1, ERG6; sterol 24-C-methyltransferase [EC:2.1.1.41]	A09100 Metabolism	B 09103 Lipid metabolism	C 00100 Steroid biosynthesis [PATH:ko00100]	3.77313	2.19528e-14
Sobic.001G187000	K01904	4CL; 4-coumarate--CoA ligase [EC:6.2.1.12]	A09100 Metabolism	B 09108 Metabolism of cofactors and vitamins	C 00130 Ubiquinone and other terpenoid-quinone biosynthesis [PATH:ko00130]	2.35298	0.00130846
Sobic.001G318500	K00799	GST, gst; glutathione S-transferase [EC:2.5.1.18]	A09100 Metabolism	B 09106 Metabolism of other amino acids	C 00480 Glutathione metabolism [PATH:ko00480]	4.14581	1.0662e-08
Sobic.001G391300	K18819	GOLS; inositol 3-alpha-galactosyltransferase [EC:2.4.1.123]	A09100 Metabolism	B 09101 Carbohydrate metabolism	C 00052 Galactose metabolism [PATH:ko00052]	2.18746	4.40677e-06
Sobic.001G471100	K10206	E2.6.1.83; LL-diaminopimelate aminotransferase [EC:2.6.1.83]	A09100 Metabolism	B 09105 Amino acid metabolism	C 00300 Lysine biosynthesis [PATH:ko00300]	6.79132	0.00276094
Sobic.001G056500	K01695	trpA; tryptophan synthase alpha chain [EC:4.2.1.20]	A09100 Metabolism	B 09105 Amino acid metabolism	C 00260 Glycine, serine and threonine metabolism [PATH:ko00260]	3.18267	0.00378736
Sobic.001G106300	K10606	FANCL, PHF9; E3 ubiquitin-protein ligase FANCL [EC:2.3.2.27]	A09120 Genetic Information Processing	B 09123 Folding, sorting and degradation	C 04120 Ubiquitin mediated proteolysis [PATH:ko04120]	2.19707	7.57014e-05
Sobic.001G318000	K00799	GST, gst; glutathione S-transferase [EC:2.5.1.18]	A09100 Metabolism	B 09106 Metabolism of other amino acids	C 00480 Glutathione metabolism [PATH:ko00480]	4.99284	2.02848e-08
Sobic.001G173000	K15803	GERD; (-)-germacrene D synthase [EC:4.2.3.75]	A09100 Metabolism	B 09109 Metabolism of terpenoids and polyketides	C 00909 Sesquiterpenoid and triterpenoid biosynthesis [PATH:ko00909]	7.68573	2.22632e-05
Sobic.001G146500	K14488	SAUR; SAUR family protein	A09130 Environmental Information Processing	B 09132 Signal transduction	C 04075 Plant hormone signal transduction [PATH:ko04075]	7.33971	0.000223575
Sobic.001G482700	K13464	JAZ; jasmonate ZIM domain-containing protein	A09130 Environmental Information Processing	B 09132 Signal transduction	C 04075 Plant hormone signal transduction [PATH:ko04075]	3.33414	1.85367e-07
Sobic.001G356000	K09422	MYBP; transcription factor MYB, plant	A09180 Brite Hierarchies	B 09182 Protein families: genetic information processing	C 03000 Transcription factors [BR:ko03000]	4.29419	5.94747e-14
Sobic.001G105900	K01762	ACS; 1-aminocyclopropane-1-carboxylate synthase [EC:4.4.1.14]	A09100 Metabolism	B 09105 Amino acid metabolism	C 00270 Cysteine and methionine metabolism [PATH:ko00270]	5.7066	0.116567
Sobic.001G045800	K01184	E3.2.1.15; polygalacturonase [EC:3.2.1.15]	A09100 Metabolism	B 09101 Carbohydrate metabolism	C 00040 Pentose and glucuronate interconversions [PATH:ko00040]	4.46284	1.11237e-11
Sobic.001G476300	K09338	HD-ZIP; homeobox-leucine zipper protein	A09180 Brite Hierarchies	B 09182 Protein families: genetic information processing	C 03000 Transcription factors [BR:ko03000]	2.56415	1.37309e-07
Sobic.001G125700	K15718	LOX1_5; linoleate 9S-lipoxygenase [EC:1.13.11.58]	A09100 Metabolism	B 09103 Lipid metabolism	C 00591 Linoleic acid metabolism [PATH:ko00591]	2.64502	8.12412e-08
Sobic.001G412700	K00799	GST, gst; glutathione S-transferase [EC:2.5.1.18]	A09100 Metabolism	B 09106 Metabolism of other amino acids	C 00480 Glutathione metabolism [PATH:ko00480]	2.82295	1.17315e-06
Sobic.001G476600	K10664	ATL6S; E3 ubiquitin-protein ligase ATL6/9/15/31/42/55 [EC:2.3.2.27]	A09180 Brite Hierarchies	B 09182 Protein families: genetic information processing	C 04121 Ubiquitin system [BR:ko04121]	2.87997	9.42105e-05
Sobic.001G451500	K01915	glnA, GLUL; glutamine synthetase [EC:6.3.1.2]	A09100 Metabolism	B 09101 Carbohydrate metabolism	C 00630 Glyoxylate and dicarboxylate metabolism [PATH:ko00630]	3.73224	4.47826e-14
Sobic.001G080300	K00430	E1.11.1.7; peroxidase [EC:1.11.1.7]	A09100 Metabolism	B 09110 Biosynthesis of other secondary metabolites	C 00940 Phenylpropanoid biosynthesis [PATH:ko00940]	10.0918	1.18956e-15
Sobic.001G138000	K03147	thiC; phosphomethylpyrimidine synthase [EC:4.1.99.17]	A09100 Metabolism	B 09108 Metabolism of cofactors and vitamins	C 00730 Thiamine metabolism [PATH:ko00730]	2.47263	1.67103e-07
Sobic.001G075800	K14411	MSI; RNA-binding protein Musashi	A09120 Genetic Information Processing	B 09122 Translation	C 03015 mRNA surveillance pathway [PATH:ko03015]	3.05224	0.00746526
Sobic.001G336200	K20619	CYP78A; cytochrome P450 family 78 subfamily A	A09180 Brite Hierarchies	B 09181 Protein families: metabolism	C 00199 Cytochrome P450 [BR:ko00199]	5.4888	0.116567
Sobic.006G024000	K13691	SGT1; pathogen-inducible salicylic acid glucosyltransferase [EC:2.4.1.-]	A09180 Brite Hierarchies	B 09181 Protein families: metabolism	C 01003 Glycosyltransferases [BR:ko01003]	2.6902	0.000193539
Sobic.006G014700	K00083	CAD; cinnamyl-alcohol dehydrogenase [EC:1.1.1.195]	A09100 Metabolism	B 09110 Biosynthesis of other secondary metabolites	C 00940 Phenylpropanoid biosynthesis [PATH:ko00940]	2.26366	0.00119646
Sobic.006G181300	K00422	E1.10.3.1; polyphenol oxidase [EC:1.10.3.1]	A09100 Metabolism	B 09105 Amino acid metabolism	C 00350 Tyrosine metabolism [PATH:ko00350]	2.8022	5.56883e-09
Sobic.006G090400	K14492	ARR-A; two-component response regulator ARR-A family	A09130 Environmental Information Processing	B 09132 Signal transduction	C 04075 Plant hormone signal transduction [PATH:ko04075]	2.16848	0.0169523
Sobic.006G265100	K01179	E3.2.1.4; endoglucanase [EC:3.2.1.4]	A09100 Metabolism	B 09101 Carbohydrate metabolism	C 00500 Starch and sucrose metabolism [PATH:ko00500]	6.88362	0.00177936
Sobic.006G144900	K13103	TFIP11; tuftelin-interacting protein 11	A09180 Brite Hierarchies	B 09182 Protein families: genetic information processing	C 03041 Spliceosome [BR:ko03041]	4.22691	0.000490134
Sobic.006G167900	K09286	EREBP; EREBP-like factor	A09180 Brite Hierarchies	B 09182 Protein families: genetic information processing	C 03000 Transcription factors [BR:ko03000]	3.34473	0.000504509
Sobic.006G212200	K14709	SLC39A1_2_3, ZIP1_2_3; solute carrier family 39 (zinc transporter), member 1/2/3	A09160 Human Diseases	B 09164 Neurodegenerative disease	0	4.32522	2.6153e-14
Sobic.006G216700	K14488	SAUR; SAUR family protein	A09130 Environmental Information Processing	B 09132 Signal transduction	C 04075 Plant hormone signal transduction [PATH:ko04075]	7.4645	0.000101063
Sobic.006G199800	K09422	MYBP; transcription factor MYB, plant	A09180 Brite Hierarchies	B 09182 Protein families: genetic information processing	C 03000 Transcription factors [BR:ko03000]	2.93126	4.35445e-08
Sobic.006G226900	K08695	ANR; anthocyanidin reductase [EC:1.3.1.77]	A09100 Metabolism	B 09110 Biosynthesis of other secondary metabolites	C 00941 Flavonoid biosynthesis [PATH:ko00941]	3.08026	6.8e-10
Sobic.006G227400	K08695	ANR; anthocyanidin reductase [EC:1.3.1.77]	A09100 Metabolism	B 09110 Biosynthesis of other secondary metabolites	C 00941 Flavonoid biosynthesis [PATH:ko00941]	2.18464	3.59828e-05
Sobic.006G001000	K24188	CYP93A; cytochrome P450 family 93 subfamily A [EC:1.14.-.-]	A09180 Brite Hierarchies	B 09181 Protein families: metabolism	C 00199 Cytochrome P450 [BR:ko00199]	2.06522	1.32382e-05
Sobic.006G183200	K09338	HD-ZIP; homeobox-leucine zipper protein	A09180 Brite Hierarchies	B 09182 Protein families: genetic information processing	C 03000 Transcription factors [BR:ko03000]	9.02387	3.04241e-10
Sobic.006G168000	K09286	EREBP; EREBP-like factor	A09180 Brite Hierarchies	B 09182 Protein families: genetic information processing	C 03000 Transcription factors [BR:ko03000]	5.01052	1.66101e-08
Sobic.006G221500	K13509	AGPAT1_2; lysophosphatidate acyltransferase [EC:2.3.1.51]	A09100 Metabolism	B 09103 Lipid metabolism	C 00561 Glycerolipid metabolism [PATH:ko00561]	2.48862	0.00149475
Sobic.006G034400	K00276	AOC3, AOC2, tynA; primary-amine oxidase [EC:1.4.3.21]	A09100 Metabolism	B 09105 Amino acid metabolism	C 00260 Glycine, serine and threonine metabolism [PATH:ko00260]	2.72169	1.15373e-08
Sobic.006G085700	K09580	PDIA1, P4HB; protein disulfide-isomerase A1 [EC:5.3.4.1]	A09120 Genetic Information Processing	B 09123 Folding, sorting and degradation	C 04141 Protein processing in endoplasmic reticulum [PATH:ko04141]	2.06218	0.00162322
Sobic.006G150100	K09872	PIP; aquaporin PIP	A09180 Brite Hierarchies	B 09183 Protein families: signaling and cellular processes	C 02000 Transporters [BR:ko02000]	2.90307	0.000174142
Sobic.006G132700	K01183	E3.2.1.14; chitinase [EC:3.2.1.14]	A09100 Metabolism	B 09101 Carbohydrate metabolism	C 00520 Amino sugar and nucleotide sugar metabolism [PATH:ko00520]	6.58687	0.00679855
Sobic.006G189700	K16281	RHA1; RING-H2 zinc finger protein RHA1	A09180 Brite Hierarchies	B 09182 Protein families: genetic information processing	C 04121 Ubiquitin system [BR:ko04121]	3.46694	5.38823e-11
Sobic.006G020500	K15397	KCS; 3-ketoacyl-CoA synthase [EC:2.3.1.199]	A09100 Metabolism	B 09103 Lipid metabolism	C 00062 Fatty acid elongation [PATH:ko00062]	3.76323	1.95522e-13
Sobic.006G020600	K15397	KCS; 3-ketoacyl-CoA synthase [EC:2.3.1.199]	A09100 Metabolism	B 09103 Lipid metabolism	C 00062 Fatty acid elongation [PATH:ko00062]	5.07008	9.39801e-17
Sobic.006G240700	K09284	AP2; AP2-like factor, euAP2 lineage	A09180 Brite Hierarchies	B 09182 Protein families: genetic information processing	C 03000 Transcription factors [BR:ko03000]	2.21413	3.66485e-06
Sobic.006G091700	K05894	OPR; 12-oxophytodienoic acid reductase [EC:1.3.1.42]	A09100 Metabolism	B 09103 Lipid metabolism	C 00592 alpha-Linolenic acid metabolism [PATH:ko00592]	2.79333	2.5031e-07
Sobic.006G066200	K05359	ADT, PDT; arogenate/prephenate dehydratase [EC:4.2.1.91 4.2.1.51]	A09100 Metabolism	B 09105 Amino acid metabolism	C 00400 Phenylalanine, tyrosine and tryptophan biosynthesis [PATH:ko00400]	3.14464	2.464e-10
Sobic.006G146100	K05350	bglB; beta-glucosidase [EC:3.2.1.21]	A09100 Metabolism	B 09101 Carbohydrate metabolism	C 00500 Starch and sucrose metabolism [PATH:ko00500]	5.37551	7.65474e-24
Sobic.006G243200	K13051	ASRGL1, iaaA; L-asparaginase / beta-aspartyl-peptidase [EC:3.5.1.1 3.4.19.5]	A09100 Metabolism	B 09105 Amino acid metabolism	C 00250 Alanine, aspartate and glutamate metabolism [PATH:ko00250]	2.81955	2.81233e-09
Sobic.006G227000	K08695	ANR; anthocyanidin reductase [EC:1.3.1.77]	A09100 Metabolism	B 09110 Biosynthesis of other secondary metabolites	C 00941 Flavonoid biosynthesis [PATH:ko00941]	5.35312	1.50655e-17
Sobic.006G181500	K03248	EIF3G; translation initiation factor 3 subunit G	A09180 Brite Hierarchies	B 09182 Protein families: genetic information processing	C 03012 Translation factors [BR:ko03012]	2.73519	0.000133814
Sobic.006G140200	K00786	GALT29A; beta-1,6-galactosyltransferase [EC:2.4.1.-]	A09180 Brite Hierarchies	B 09181 Protein families: metabolism	C 01003 Glycosyltransferases [BR:ko01003]	3.46831	3.55336e-10
Sobic.006G233500	K14431	TGA; transcription factor TGA	A09130 Environmental Information Processing	B 09132 Signal transduction	C 04075 Plant hormone signal transduction [PATH:ko04075]	2.45451	2.75409e-07
Sobic.006G056400	K13464	JAZ; jasmonate ZIM domain-containing protein	A09130 Environmental Information Processing	B 09132 Signal transduction	C 04075 Plant hormone signal transduction [PATH:ko04075]	4.11833	1.10174e-07
Sobic.006G200800	K00855	PRK, prkB; phosphoribulokinase [EC:2.7.1.19]	A09100 Metabolism	B 09102 Energy metabolism	C 00710 Carbon fixation in photosynthetic organisms [PATH:ko00710]	2.2841	2.55454e-06
Sobic.006G063100	K19042	BOI; E3 ubiquitin-protein ligase BOI and related proteins [EC:2.3.2.27]	A09180 Brite Hierarchies	B 09182 Protein families: genetic information processing	C 04121 Ubiquitin system [BR:ko04121]	2.15125	8.8048e-05
Sobic.006G096400	K22374	DMAS1; 3''-deamino-3''-oxonicotianamine reductase [EC:1.1.1.285]	A09100 Metabolism	B 09110 Biosynthesis of other secondary metabolites	C 00997 Biosynthesis of various secondary metabolites - part 3 [PATH:ko00997]	2.36435	7.27279e-07
Sobic.006G190000	K24028	DMR6, DLO; salicylic acid 3-hydroxylase [EC:1.14.11.-]	A09180 Brite Hierarchies	B 09191 Unclassified: metabolism	C 99980 Enzymes with EC numbers	5.89578	0.0722761
Sobic.006G062200	K15340	DCLRE1A, SNM1A, PSO2; DNA cross-link repair 1A protein	A09180 Brite Hierarchies	B 09182 Protein families: genetic information processing	C 03400 DNA repair and recombination proteins [BR:ko03400]	2.25997	5.86452e-05
Sobic.006G102800	K24193	STP; MFS transporter, SP family, sugar:H+ symporter	A09180 Brite Hierarchies	B 09183 Protein families: signaling and cellular processes	C 02000 Transporters [BR:ko02000]	2.24024	2.65385e-06
Sobic.006G061300	K03549	kup; KUP system potassium uptake protein	A09180 Brite Hierarchies	B 09183 Protein families: signaling and cellular processes	C 02000 Transporters [BR:ko02000]	2.84326	4.40665e-09
Sobic.006G057866	K12129	PRR7; pseudo-response regulator 7	A09150 Organismal Systems	B 09159 Environmental adaptation	0	2.48593	1.04759e-05
Sobic.002G255700	K00224	CEQORH; chloroplastic oxoene reductase [EC:1.3.1.-]	A09100 Metabolism	B 09103 Lipid metabolism	C 00592 alpha-Linolenic acid metabolism [PATH:ko00592]	6.06301	0.0447833
Sobic.002G247200	K24444	JMJ30; [histone H3]-dimethyl/trimethyl-L-lysine36 demethylase [EC:1.14.11.27 1.14.11.-]	A09180 Brite Hierarchies	B 09182 Protein families: genetic information processing	C 03036 Chromosome and associated proteins [BR:ko03036]	3.85386	6.75361e-14
Sobic.002G203900	K01246	tag; DNA-3-methyladenine glycosylase I [EC:3.2.2.20]	A09120 Genetic Information Processing	B 09124 Replication and repair	C 03410 Base excision repair [PATH:ko03410]	2.69102	1.12947e-07
Sobic.002G337100	K15014	SLC29A1_2_3, ENT1_2_3; solute carrier family 29 (equilibrative nucleoside transporter), member 1/2/3	A09160 Human Diseases	B 09165 Substance dependence	0	2.6683	1.16569e-06
Sobic.002G257001	K13947	PIN; auxin efflux carrier family protein	A09180 Brite Hierarchies	B 09183 Protein families: signaling and cellular processes	C 02000 Transporters [BR:ko02000]	2.41402	0.00126615
Sobic.002G095400	K21398	SLC11A2, DMT1, NRAMP2; natural resistance-associated macrophage protein 2	A09140 Cellular Processes	B 09141 Transport and catabolism	C 04142 Lysosome [PATH:ko04142]	2.89597	7.08671e-08
Sobic.002G247300	K14431	TGA; transcription factor TGA	A09130 Environmental Information Processing	B 09132 Signal transduction	C 04075 Plant hormone signal transduction [PATH:ko04075]	7.9646	3.82591e-06
Sobic.002G160300	K00895	pfp, PFP; diphosphate-dependent phosphofructokinase [EC:2.7.1.90]	A09100 Metabolism	B 09101 Carbohydrate metabolism	C 00010 Glycolysis / Gluconeogenesis [PATH:ko00010]	3.08045	1.14713e-07
Sobic.002G175500	K16296	SCPL-I; serine carboxypeptidase-like clade I [EC:3.4.16.-]	A09180 Brite Hierarchies	B 09181 Protein families: metabolism	C 01002 Peptidases and inhibitors [BR:ko01002]	2.31345	1.4016e-06
Sobic.002G361100	K00799	GST, gst; glutathione S-transferase [EC:2.5.1.18]	A09100 Metabolism	B 09106 Metabolism of other amino acids	C 00480 Glutathione metabolism [PATH:ko00480]	5.4888	0.116567
Sobic.002G172000	K14497	PP2C; protein phosphatase 2C [EC:3.1.3.16]	A09130 Environmental Information Processing	B 09132 Signal transduction	C 04016 MAPK signaling pathway - plant [PATH:ko04016]	2.31748	1.4389e-05
Sobic.002G130000	K11778	DHDDS, RER2, SRT1; ditrans,polycis-polyprenyl diphosphate synthase [EC:2.5.1.87]	A09100 Metabolism	B 09109 Metabolism of terpenoids and polyketides	C 00900 Terpenoid backbone biosynthesis [PATH:ko00900]	2.29384	1.70896e-06
Sobic.002G224100	K15102	SLC25A3, PHC, PIC; solute carrier family 25 (mitochondrial phosphate transporter), member 3	A09180 Brite Hierarchies	B 09183 Protein families: signaling and cellular processes	C 02000 Transporters [BR:ko02000]	7.63352	3.22552e-05
Sobic.002G274800	K22013	SGR, SGRL; magnesium dechelatase [EC:4.99.1.10]	A09100 Metabolism	B 09108 Metabolism of cofactors and vitamins	C 00860 Porphyrin and chlorophyll metabolism [PATH:ko00860]	2.64954	5.74193e-08
Sobic.002G430500	K05857	PLCD; phosphatidylinositol phospholipase C, delta [EC:3.1.4.11]	A09100 Metabolism	B 09101 Carbohydrate metabolism	C 00562 Inositol phosphate metabolism [PATH:ko00562]	2.14566	7.0855e-06
Sobic.002G298400	K11778	DHDDS, RER2, SRT1; ditrans,polycis-polyprenyl diphosphate synthase [EC:2.5.1.87]	A09100 Metabolism	B 09109 Metabolism of terpenoids and polyketides	C 00900 Terpenoid backbone biosynthesis [PATH:ko00900]	8.43012	8.83342e-08
Sobic.002G208700	K05387	GRIP; glutamate receptor, ionotropic, plant	A09180 Brite Hierarchies	B 09183 Protein families: signaling and cellular processes	C 04040 Ion channels [BR:ko04040]	2.42056	2.87999e-06
Sobic.002G316800	K12951	ctpD; cobalt/nickel-transporting P-type ATPase D [EC:7.2.2.-]	A09180 Brite Hierarchies	B 09191 Unclassified: metabolism	C 99980 Enzymes with EC numbers	2.16398	1.86216e-05
Sobic.002G431700	K04802	PCNA; proliferating cell nuclear antigen	A09120 Genetic Information Processing	B 09124 Replication and repair	C 03030 DNA replication [PATH:ko03030]	3.71517	4.24596e-06
Sobic.002G278800	K01166	RNASET2; ribonuclease T2 [EC:4.6.1.19]	A09180 Brite Hierarchies	B 09182 Protein families: genetic information processing	C 03016 Transfer RNA biogenesis [BR:ko03016]	2.58948	0.000218961
Sobic.002G093400	K14664	ILR1; IAA-amino acid hydrolase [EC:3.5.1.-]	A09180 Brite Hierarchies	B 09181 Protein families: metabolism	C 01002 Peptidases and inhibitors [BR:ko01002]	9.44328	3.17671e-12
Sobic.002G216500	K20623	CYP92A6; typhasterol/6-deoxotyphasterol 2alpha-hydroxylase	A09100 Metabolism	B 09109 Metabolism of terpenoids and polyketides	C 00905 Brassinosteroid biosynthesis [PATH:ko00905]	2.0293	0.000434001
Sobic.002G261600	K01188	E3.2.1.21; beta-glucosidase [EC:3.2.1.21]	A09100 Metabolism	B 09101 Carbohydrate metabolism	C 00500 Starch and sucrose metabolism [PATH:ko00500]	3.39655	2.55139e-12
Sobic.002G186500	K22138	MPC1; mitochondrial pyruvate carrier 1	A09160 Human Diseases	B 09166 Cardiovascular disease	0	2.06285	0.00186226
Sobic.002G334500	K20924	CSLD; cellulose synthase-like protein [EC:2.4.1.-]	A09180 Brite Hierarchies	B 09181 Protein families: metabolism	C 01003 Glycosyltransferases [BR:ko01003]	2.54211	5.3615e-05
Sobic.002G220300	K09338	HD-ZIP; homeobox-leucine zipper protein	A09180 Brite Hierarchies	B 09182 Protein families: genetic information processing	C 03000 Transcription factors [BR:ko03000]	2.26048	4.18152e-06
Sobic.002G179800	K15032	MTERFD; mTERF domain-containing protein, mitochondrial	A09180 Brite Hierarchies	B 09182 Protein families: genetic information processing	C 03012 Translation factors [BR:ko03012]	2.0116	0.0921628
Sobic.002G168400	K13457	RPM1, RPS3; disease resistance protein RPM1	A09150 Organismal Systems	B 09159 Environmental adaptation	0	2.58203	0.00178
Sobic.002G205100	K13065	E2.3.1.133, HCT; shikimate O-hydroxycinnamoyltransferase [EC:2.3.1.133]	A09100 Metabolism	B 09110 Biosynthesis of other secondary metabolites	C 00940 Phenylpropanoid biosynthesis [PATH:ko00940]	2.78153	1.54553e-07
Sobic.002G024400	K16297	SCPL-II; serine carboxypeptidase-like clade II [EC:3.4.16.-]	A09180 Brite Hierarchies	B 09181 Protein families: metabolism	C 01002 Peptidases and inhibitors [BR:ko01002]	3.31686	2.40491e-11
Sobic.002G209000	K05387	GRIP; glutamate receptor, ionotropic, plant	A09180 Brite Hierarchies	B 09183 Protein families: signaling and cellular processes	C 04040 Ion channels [BR:ko04040]	3.05209	6.28621e-05
Sobic.002G262500	K16223	FT; protein FLOWERING LOCUS T	A09150 Organismal Systems	B 09159 Environmental adaptation	0	2.09221	0.0031679
Sobic.002G041200	K00815	TAT; tyrosine aminotransferase [EC:2.6.1.5]	A09100 Metabolism	B 09105 Amino acid metabolism	C 00270 Cysteine and methionine metabolism [PATH:ko00270]	3.58542	8.02286e-13
Sobic.002G282900	K01581	E4.1.1.17, ODC1, speC, speF; ornithine decarboxylase [EC:4.1.1.17]	A09100 Metabolism	B 09105 Amino acid metabolism	C 00330 Arginine and proline metabolism [PATH:ko00330]	2.65809	0.00044505
Sobic.002G204500	K01115	PLD1_2; phospholipase D1/2 [EC:3.1.4.4]	A09100 Metabolism	B 09103 Lipid metabolism	C 00564 Glycerophospholipid metabolism [PATH:ko00564]	4.58566	1.53813e-08
Sobic.002G369600	K12930	BZ1; anthocyanidin 3-O-glucosyltransferase [EC:2.4.1.115]	A09100 Metabolism	B 09110 Biosynthesis of other secondary metabolites	C 00942 Anthocyanin biosynthesis [PATH:ko00942]	10.9858	1.24536e-19
Sobic.002G293500	K08193	SLC17A; MFS transporter, ACS family, solute carrier family 17 (sodium-dependent inorganic phosphate cotransporter), other	A09180 Brite Hierarchies	B 09183 Protein families: signaling and cellular processes	C 02000 Transporters [BR:ko02000]	2.28607	4.71152e-06
Sobic.002G265600	K13691	SGT1; pathogen-inducible salicylic acid glucosyltransferase [EC:2.4.1.-]	A09180 Brite Hierarchies	B 09181 Protein families: metabolism	C 01003 Glycosyltransferases [BR:ko01003]	9.15927	6.51666e-11
Sobic.002G153100	K14431	TGA; transcription factor TGA	A09130 Environmental Information Processing	B 09132 Signal transduction	C 04075 Plant hormone signal transduction [PATH:ko04075]	2.22005	2.94769e-05
Sobic.002G357000	K00430	E1.11.1.7; peroxidase [EC:1.11.1.7]	A09100 Metabolism	B 09110 Biosynthesis of other secondary metabolites	C 00940 Phenylpropanoid biosynthesis [PATH:ko00940]	2.67773	1.97549e-08
Sobic.002G116800	K05531	MNN10; mannan polymerase II complex MNN10 subunit [EC:2.4.1.-]	A09100 Metabolism	B 09107 Glycan biosynthesis and metabolism	C 00513 Various types of N-glycan biosynthesis [PATH:ko00513]	2.19176	2.42466e-05
Sobic.002G167600	K23953	PCO; plant cysteine oxidase [EC:1.13.11.-]	A09180 Brite Hierarchies	B 09191 Unclassified: metabolism	C 99980 Enzymes with EC numbers	2.26747	2.82036e-06
Sobic.002G206600	K22314	GGP; glucosinolate gamma-glutamyl hydrolase [EC:3.4.19.16]	A09180 Brite Hierarchies	B 09191 Unclassified: metabolism	C 99980 Enzymes with EC numbers	10.8321	5.79228e-20
Sobic.002G115400	K14516	ERF1; ethylene-responsive transcription factor 1	A09130 Environmental Information Processing	B 09132 Signal transduction	C 04016 MAPK signaling pathway - plant [PATH:ko04016]	3.12062	0.00036982
Sobic.002G083200	K14709	SLC39A1_2_3, ZIP1_2_3; solute carrier family 39 (zinc transporter), member 1/2/3	A09160 Human Diseases	B 09164 Neurodegenerative disease	0	2.25032	2.56199e-06
Sobic.002G171200	K20924	CSLD; cellulose synthase-like protein [EC:2.4.1.-]	A09180 Brite Hierarchies	B 09181 Protein families: metabolism	C 01003 Glycosyltransferases [BR:ko01003]	3.35926	2.76766e-07
Sobic.002G213300	K07052	K07052; CAAX protease family protein	A09180 Brite Hierarchies	B 09181 Protein families: metabolism	C 01002 Peptidases and inhibitors [BR:ko01002]	2.60626	6.21643e-08
Sobic.010G253200	K12446	E2.7.1.46; L-arabinokinase [EC:2.7.1.46]	A09100 Metabolism	B 09101 Carbohydrate metabolism	C 00520 Amino sugar and nucleotide sugar metabolism [PATH:ko00520]	-2.88854	5.27086e-09
Sobic.010G215300	K07760	CDK; cyclin-dependent kinase [EC:2.7.11.22]	A09180 Brite Hierarchies	B 09181 Protein families: metabolism	C 01001 Protein kinases [BR:ko01001]	-4.88681	1.8705e-13
Sobic.010G097000	K23877	AXY4, AXY4L; xyloglucan O-acetyltransferase	A09180 Brite Hierarchies	B 09191 Unclassified: metabolism	C 99986 Glycan metabolism	-4.59846	1.04505e-09
Sobic.010G273600	K20547	CHIB; basic endochitinase B [EC:3.2.1.14]	A09100 Metabolism	B 09101 Carbohydrate metabolism	C 00520 Amino sugar and nucleotide sugar metabolism [PATH:ko00520]	-8.18374	2.09332e-22
Sobic.010G189600	K08472	MLO; mlo protein	A09180 Brite Hierarchies	B 09183 Protein families: signaling and cellular processes	C 04030 G protein-coupled receptors [BR:ko04030]	-2.43183	7.66521e-05
Sobic.010G175800	K00799	GST, gst; glutathione S-transferase [EC:2.5.1.18]	A09100 Metabolism	B 09106 Metabolism of other amino acids	C 00480 Glutathione metabolism [PATH:ko00480]	-10.2717	1.44925e-16
Sobic.010G047100	K11253	H3; histone H3	A09150 Organismal Systems	B 09151 Immune system	C 04613 Neutrophil extracellular trap formation [PATH:ko04613]	-4.56214	1.08512e-17
Sobic.010G027700	K14488	SAUR; SAUR family protein	A09130 Environmental Information Processing	B 09132 Signal transduction	C 04075 Plant hormone signal transduction [PATH:ko04075]	-8.53456	2.38407e-29
Sobic.010G162000	K00430	E1.11.1.7; peroxidase [EC:1.11.1.7]	A09100 Metabolism	B 09110 Biosynthesis of other secondary metabolites	C 00940 Phenylpropanoid biosynthesis [PATH:ko00940]	-6.7306	7.08137e-14
Sobic.010G214600	K05016	CLCN7; chloride channel 7	A09180 Brite Hierarchies	B 09181 Protein families: metabolism	C 01009 Protein phosphatases and associated proteins [BR:ko01009]	-4.50458	5.1272e-19
Sobic.010G086000	K18810	CYCD1_2_4; cyclin D1/2/4, plant	A09180 Brite Hierarchies	B 09193 Unclassified: signaling and cellular processes	C 99995 Signaling proteins	-2.87183	0.0017063
Sobic.010G274000	K21777	CCNB; G2/mitotic-specific cyclin-B, other	A09180 Brite Hierarchies	B 09182 Protein families: genetic information processing	C 03032 DNA replication proteins [BR:ko03032]	-4.25561	1.57722e-12
Sobic.010G008000	K09422	MYBP; transcription factor MYB, plant	A09180 Brite Hierarchies	B 09182 Protein families: genetic information processing	C 03000 Transcription factors [BR:ko03000]	-10.5259	5.0109e-18
Sobic.010G231600	K21995	CYP77A; cytochrome P450 family 77 subfamily A [EC:1.14.-.-]	A09100 Metabolism	B 09103 Lipid metabolism	C 00073 Cutin, suberine and wax biosynthesis [PATH:ko00073]	-3.14179	1.38955e-10
Sobic.010G115700	K00430	E1.11.1.7; peroxidase [EC:1.11.1.7]	A09100 Metabolism	B 09110 Biosynthesis of other secondary metabolites	C 00940 Phenylpropanoid biosynthesis [PATH:ko00940]	-3.25757	3.93555e-11
Sobic.010G235300	K03921	FAB2, SSI2, desA1; acyl-[acyl-carrier-protein] desaturase [EC:1.14.19.2 1.14.19.11 1.14.19.26]	A09100 Metabolism	B 09103 Lipid metabolism	C 00061 Fatty acid biosynthesis [PATH:ko00061]	-5.16891	1.11984e-17
Sobic.010G088950	K25006	RBM24_38; RNA-binding protein 24/38	A09180 Brite Hierarchies	B 09182 Protein families: genetic information processing	C 03041 Spliceosome [BR:ko03041]	-3.87949	2.34761e-08
Sobic.010G096400	K23877	AXY4, AXY4L; xyloglucan O-acetyltransferase	A09180 Brite Hierarchies	B 09191 Unclassified: metabolism	C 99986 Glycan metabolism	-6.5464	8.92258e-12
Sobic.010G214700	K08248	MDL3; (R)-mandelonitrile lyase [EC:4.1.2.10]	A09100 Metabolism	B 09106 Metabolism of other amino acids	C 00460 Cyanoamino acid metabolism [PATH:ko00460]	-2.08593	0.000352442
Sobic.010G129700	K16732	PRC1, ASE1, MAP65; Ase1/PRC1/MAP65 family protein	A09180 Brite Hierarchies	B 09182 Protein families: genetic information processing	C 03036 Chromosome and associated proteins [BR:ko03036]	-2.61959	7.79508e-08
Sobic.010G171800	K00423	E1.10.3.3; L-ascorbate oxidase [EC:1.10.3.3]	A09100 Metabolism	B 09101 Carbohydrate metabolism	C 00053 Ascorbate and aldarate metabolism [PATH:ko00053]	-3.62413	4.98778e-09
Sobic.010G246300	K19041	RNF38_44; E3 ubiquitin-protein ligase RNF38/44 [EC:2.3.2.27]	A09180 Brite Hierarchies	B 09182 Protein families: genetic information processing	C 04121 Ubiquitin system [BR:ko04121]	-8.14636	1.01193e-06
Sobic.010G090100	K01834	PGAM, gpmA; 2,3-bisphosphoglycerate-dependent phosphoglycerate mutase [EC:5.4.2.11]	A09100 Metabolism	B 09101 Carbohydrate metabolism	C 00010 Glycolysis / Gluconeogenesis [PATH:ko00010]	-2.41994	0.00222213
Sobic.010G147700	K11274	WDHD1, CTF4; chromosome transmission fidelity protein 4	A09180 Brite Hierarchies	B 09182 Protein families: genetic information processing	C 03036 Chromosome and associated proteins [BR:ko03036]	-3.20495	1.89312e-07
Sobic.010G020600	K20718	ER; LRR receptor-like serine/threonine-protein kinase ERECTA [EC:2.7.11.1]	A09130 Environmental Information Processing	B 09132 Signal transduction	C 04016 MAPK signaling pathway - plant [PATH:ko04016]	-2.82142	5.49135e-09
Sobic.010G222900	K25318	MEI1; meiosis inhibitor protein 1	A09180 Brite Hierarchies	B 09182 Protein families: genetic information processing	C 03400 DNA repair and recombination proteins [BR:ko03400]	-2.08335	0.00994415
Sobic.010G107200	K15397	KCS; 3-ketoacyl-CoA synthase [EC:2.3.1.199]	A09100 Metabolism	B 09103 Lipid metabolism	C 00062 Fatty acid elongation [PATH:ko00062]	-2.23223	2.75546e-06
Sobic.010G033300	K10781	FATB; fatty acyl-ACP thioesterase B [EC:3.1.2.14 3.1.2.21]	A09100 Metabolism	B 09103 Lipid metabolism	C 00061 Fatty acid biosynthesis [PATH:ko00061]	-2.3371	1.20293e-06
Sobic.010G182000	K03066	PSMC5, RPT6; 26S proteasome regulatory subunit T6	A09120 Genetic Information Processing	B 09123 Folding, sorting and degradation	C 03050 Proteasome [PATH:ko03050]	-3.01399	0.000144428
Sobic.010G168800	K00469	MIOX; inositol oxygenase [EC:1.13.99.1]	A09100 Metabolism	B 09101 Carbohydrate metabolism	C 00053 Ascorbate and aldarate metabolism [PATH:ko00053]	-5.84303	5.9273e-27
Sobic.010G047200	K11253	H3; histone H3	A09150 Organismal Systems	B 09151 Immune system	C 04613 Neutrophil extracellular trap formation [PATH:ko04613]	-9.39134	6.84051e-12
Sobic.010G101300	K00161	PDHA, pdhA; pyruvate dehydrogenase E1 component alpha subunit [EC:1.2.4.1]	A09100 Metabolism	B 09101 Carbohydrate metabolism	C 00010 Glycolysis / Gluconeogenesis [PATH:ko00010]	-2.25882	0.000702579
Sobic.010G092200	K04713	SUR2; sphinganine C4-monooxygenase [EC:1.14.18.5]	A09100 Metabolism	B 09103 Lipid metabolism	C 00600 Sphingolipid metabolism [PATH:ko00600]	-2.32637	2.1333e-05
Sobic.010G146100	K09873	TIP; aquaporin TIP	A09180 Brite Hierarchies	B 09183 Protein families: signaling and cellular processes	C 02000 Transporters [BR:ko02000]	-3.74696	1.74665e-14
Sobic.010G252401	K14488	SAUR; SAUR family protein	A09130 Environmental Information Processing	B 09132 Signal transduction	C 04075 Plant hormone signal transduction [PATH:ko04075]	-7.23831	0.000499811
Sobic.010G080800	K11982	RNF115_126; E3 ubiquitin-protein ligase RNF115/126 [EC:2.3.2.27]	A09180 Brite Hierarchies	B 09182 Protein families: genetic information processing	C 04131 Membrane trafficking [BR:ko04131]	-8.10072	1.9553e-06
Sobic.010G103700	K02321	POLA2; DNA polymerase alpha subunit B	A09120 Genetic Information Processing	B 09124 Replication and repair	C 03030 DNA replication [PATH:ko03030]	-2.50084	0.00580478
Sobic.010G161800	K00430	E1.11.1.7; peroxidase [EC:1.11.1.7]	A09100 Metabolism	B 09110 Biosynthesis of other secondary metabolites	C 00940 Phenylpropanoid biosynthesis [PATH:ko00940]	-8.27521	3.91468e-07
Sobic.010G202700	K09284	AP2; AP2-like factor, euAP2 lineage	A09180 Brite Hierarchies	B 09182 Protein families: genetic information processing	C 03000 Transcription factors [BR:ko03000]	-9.25215	3.46435e-11
Sobic.010G106100	K01179	E3.2.1.4; endoglucanase [EC:3.2.1.4]	A09100 Metabolism	B 09101 Carbohydrate metabolism	C 00500 Starch and sucrose metabolism [PATH:ko00500]	-10.3223	7.80587e-17
Sobic.010G067900	K02603	ORC1; origin recognition complex subunit 1	A09140 Cellular Processes	B 09143 Cell growth and death	C 04110 Cell cycle [PATH:ko04110]	-3.50084	5.94726e-09
Sobic.010G261800	K09264	K09264; MADS-box transcription factor, plant	A09180 Brite Hierarchies	B 09182 Protein families: genetic information processing	C 03000 Transcription factors [BR:ko03000]	-2.47445	0.000990625
Sobic.010G189300	K08909	LHCA3; light-harvesting complex I chlorophyll a/b binding protein 3	A09100 Metabolism	B 09102 Energy metabolism	C 00196 Photosynthesis - antenna proteins [PATH:ko00196]	-2.52725	8.82376e-08
Sobic.010G104800	K17991	PXG; peroxygenase [EC:1.11.2.3]	A09100 Metabolism	B 09103 Lipid metabolism	C 00073 Cutin, suberine and wax biosynthesis [PATH:ko00073]	-2.17587	3.47026e-05
Sobic.010G092900	K03798	ftsH, hflB; cell division protease FtsH [EC:3.4.24.-]	A09180 Brite Hierarchies	B 09181 Protein families: metabolism	C 01002 Peptidases and inhibitors [BR:ko01002]	-6.47945	0.0107979
Sobic.010G161700	K00430	E1.11.1.7; peroxidase [EC:1.11.1.7]	A09100 Metabolism	B 09110 Biosynthesis of other secondary metabolites	C 00940 Phenylpropanoid biosynthesis [PATH:ko00940]	-8.72963	7.34981e-09
Sobic.010G222501	K10523	SPOP; speckle-type POZ protein	A09130 Environmental Information Processing	B 09132 Signal transduction	C 04340 Hedgehog signaling pathway [PATH:ko04340]	-4.08689	0.000115561
Sobic.010G251700	K24976	TRK, HKT; Trk/Ktr/HKT type cation transporter	A09180 Brite Hierarchies	B 09183 Protein families: signaling and cellular processes	C 02000 Transporters [BR:ko02000]	-8.39348	1.57245e-07
Sobic.010G078700	K09338	HD-ZIP; homeobox-leucine zipper protein	A09180 Brite Hierarchies	B 09182 Protein families: genetic information processing	C 03000 Transcription factors [BR:ko03000]	-3.78282	1.43188e-11
Sobic.010G030100	K09338	HD-ZIP; homeobox-leucine zipper protein	A09180 Brite Hierarchies	B 09182 Protein families: genetic information processing	C 03000 Transcription factors [BR:ko03000]	-6.02222	2.01409e-23
Sobic.010G260800	K06627	CCNA; cyclin-A	A09130 Environmental Information Processing	B 09132 Signal transduction	C 04152 AMPK signaling pathway [PATH:ko04152]	-3.2159	1.93496e-06
Sobic.010G218500	K25784	#N/A	#N/A	#N/A	#N/A	-2.83323	5.14401e-09
Sobic.010G259300	K19861	BEBT, AMAT; benzyl alcohol O-benzoyltransferase [EC:2.3.1.196 2.3.1.232]	A09180 Brite Hierarchies	B 09191 Unclassified: metabolism	C 99980 Enzymes with EC numbers	-3.22655	0.00017474
Sobic.010G089500	K17098	ANNAT; annexin D	A09180 Brite Hierarchies	B 09193 Unclassified: signaling and cellular processes	C 99992 Structural proteins	-2.5312	1.80547e-07
Sobic.010G179400	K08237	E2.4.1.218; hydroquinone glucosyltransferase [EC:2.4.1.218]	A09180 Brite Hierarchies	B 09181 Protein families: metabolism	C 01003 Glycosyltransferases [BR:ko01003]	-9.00206	4.80354e-10
Sobic.010G246600	K14504	TCH4; xyloglucan:xyloglucosyl transferase TCH4 [EC:2.4.1.207]	A09130 Environmental Information Processing	B 09132 Signal transduction	C 04075 Plant hormone signal transduction [PATH:ko04075]	-2.92719	7.89604e-10
Sobic.010G020100	K01180	E3.2.1.6; endo-1,3(4)-beta-glucanase [EC:3.2.1.6]	A09180 Brite Hierarchies	B 09191 Unclassified: metabolism	C 99980 Enzymes with EC numbers	-2.1392	0.0499121
Sobic.010G246500	K14504	TCH4; xyloglucan:xyloglucosyl transferase TCH4 [EC:2.4.1.207]	A09130 Environmental Information Processing	B 09132 Signal transduction	C 04075 Plant hormone signal transduction [PATH:ko04075]	-5.3126	1.92525e-17
Sobic.010G276700	K00695	SUS; sucrose synthase [EC:2.4.1.13]	A09100 Metabolism	B 09101 Carbohydrate metabolism	C 00500 Starch and sucrose metabolism [PATH:ko00500]	-3.92309	8.52018e-15
Sobic.010G062900	K20782	HPAT; hydroxyproline O-arabinosyltransferase [EC:2.4.2.58]	A09100 Metabolism	B 09107 Glycan biosynthesis and metabolism	C 00514 Other types of O-glycan biosynthesis [PATH:ko00514]	-3.86412	9.21913e-08
Sobic.010G047700	K00703	glgA; starch synthase [EC:2.4.1.21]	A09100 Metabolism	B 09101 Carbohydrate metabolism	C 00500 Starch and sucrose metabolism [PATH:ko00500]	-2.51485	1.26656e-07
Sobic.010G171300	K14709	SLC39A1_2_3, ZIP1_2_3; solute carrier family 39 (zinc transporter), member 1/2/3	A09160 Human Diseases	B 09164 Neurodegenerative disease	0	-2.80446	1.15496e-05
Sobic.010G026925	K01689	ENO, eno; enolase [EC:4.2.1.11]	A09100 Metabolism	B 09101 Carbohydrate metabolism	C 00010 Glycolysis / Gluconeogenesis [PATH:ko00010]	-2.3072	1.07138e-06
Sobic.003G375900	K24917	AAP; amino acid permease	A09180 Brite Hierarchies	B 09183 Protein families: signaling and cellular processes	C 02000 Transporters [BR:ko02000]	-3.78245	1.73859e-14
Sobic.003G361200	K02213	CDC6; cell division control protein 6	A09140 Cellular Processes	B 09143 Cell growth and death	C 04110 Cell cycle [PATH:ko04110]	-3.83455	1.14838e-05
Sobic.003G183300	K00430	E1.11.1.7; peroxidase [EC:1.11.1.7]	A09100 Metabolism	B 09110 Biosynthesis of other secondary metabolites	C 00940 Phenylpropanoid biosynthesis [PATH:ko00940]	-2.36556	2.09799e-06
Sobic.003G133700	K08193	SLC17A; MFS transporter, ACS family, solute carrier family 17 (sodium-dependent inorganic phosphate cotransporter), other	A09180 Brite Hierarchies	B 09183 Protein families: signaling and cellular processes	C 02000 Transporters [BR:ko02000]	-2.34674	7.18378e-07
Sobic.003G183700	K02212	MCM4, CDC54; DNA replication licensing factor MCM4 [EC:3.6.4.12]	A09120 Genetic Information Processing	B 09124 Replication and repair	C 03030 DNA replication [PATH:ko03030]	-4.18905	9.93816e-13
Sobic.003G250000	K00430	E1.11.1.7; peroxidase [EC:1.11.1.7]	A09100 Metabolism	B 09110 Biosynthesis of other secondary metabolites	C 00940 Phenylpropanoid biosynthesis [PATH:ko00940]	-2.39477	1.15576e-06
Sobic.003G212800	K10401	KIF18_19; kinesin family member 18/19	A09180 Brite Hierarchies	B 09183 Protein families: signaling and cellular processes	C 04812 Cytoskeleton proteins [BR:ko04812]	-4.75147	1.10557e-13
Sobic.003G353200	K05909	E1.10.3.2; laccase [EC:1.10.3.2]	A09180 Brite Hierarchies	B 09191 Unclassified: metabolism	C 99980 Enzymes with EC numbers	-2.2308	2.15464e-05
Sobic.003G179500	K06676	BRRN1, BRN1, CAPH; condensin complex subunit 2	A09140 Cellular Processes	B 09143 Cell growth and death	C 04111 Cell cycle - yeast [PATH:ko04111]	-9.84327	3.78043e-14
Sobic.003G152000	K00430	E1.11.1.7; peroxidase [EC:1.11.1.7]	A09100 Metabolism	B 09110 Biosynthesis of other secondary metabolites	C 00940 Phenylpropanoid biosynthesis [PATH:ko00940]	-2.97935	8.12412e-08
Sobic.003G290500	K05759	PFN; profilin	A09130 Environmental Information Processing	B 09132 Signal transduction	C 04013 MAPK signaling pathway - fly [PATH:ko04013]	-3.00541	5.9462e-10
Sobic.003G292700	K10406	KIFC2_3; kinesin family member C2/C3	A09180 Brite Hierarchies	B 09183 Protein families: signaling and cellular processes	C 04812 Cytoskeleton proteins [BR:ko04812]	-2.13387	9.70953e-06
Sobic.003G122200	K07937	ARF1_2; ADP-ribosylation factor 1/2	A09130 Environmental Information Processing	B 09132 Signal transduction	C 04072 Phospholipase D signaling pathway [PATH:ko04072]	-2.82431	3.40161e-09
Sobic.003G368100	K15400	HHT1; omega-hydroxypalmitate O-feruloyl transferase [EC:2.3.1.188]	A09100 Metabolism	B 09103 Lipid metabolism	C 00073 Cutin, suberine and wax biosynthesis [PATH:ko00073]	-3.87897	6.30799e-15
Sobic.003G178500	K15397	KCS; 3-ketoacyl-CoA synthase [EC:2.3.1.199]	A09100 Metabolism	B 09103 Lipid metabolism	C 00062 Fatty acid elongation [PATH:ko00062]	-13.1058	8.36258e-35
Sobic.003G043900	K10406	KIFC2_3; kinesin family member C2/C3	A09180 Brite Hierarchies	B 09183 Protein families: signaling and cellular processes	C 04812 Cytoskeleton proteins [BR:ko04812]	-9.27288	2.80828e-11
Sobic.003G393100	K06674	SMC2; structural maintenance of chromosome 2	A09140 Cellular Processes	B 09143 Cell growth and death	C 04111 Cell cycle - yeast [PATH:ko04111]	-2.16635	2.91762e-05
Sobic.003G350100	K11252	H2B; histone H2B	A09150 Organismal Systems	B 09151 Immune system	C 04613 Neutrophil extracellular trap formation [PATH:ko04613]	-4.5151	4.9381e-17
Sobic.003G172300	K02704	psbB; photosystem II CP47 chlorophyll apoprotein	A09100 Metabolism	B 09102 Energy metabolism	C 00195 Photosynthesis [PATH:ko00195]	-2.10909	0.0134821
Sobic.003G209800	K08912	LHCB1; light-harvesting complex II chlorophyll a/b binding protein 1	A09100 Metabolism	B 09102 Energy metabolism	C 00196 Photosynthesis - antenna proteins [PATH:ko00196]	-5.84477	2.33857e-28
Sobic.003G110200	K19825	DBR; 2-alkenal reductase (NADP+) [EC:1.3.1.102]	A09180 Brite Hierarchies	B 09191 Unclassified: metabolism	C 99980 Enzymes with EC numbers	-2.17535	5.62587e-06
Sobic.003G092200	K11252	H2B; histone H2B	A09150 Organismal Systems	B 09151 Immune system	C 04613 Neutrophil extracellular trap formation [PATH:ko04613]	-3.66566	1.94756e-07
Sobic.003G045900	K04124	GA3ox; gibberellin 3beta-dioxygenase [EC:1.14.11.15]	A09100 Metabolism	B 09109 Metabolism of terpenoids and polyketides	C 00904 Diterpenoid biosynthesis [PATH:ko00904]	-7.23831	0.000499811
Sobic.003G317700	K05391	CNGC; cyclic nucleotide gated channel, plant	A09150 Organismal Systems	B 09159 Environmental adaptation	0	-7.23831	0.000499811
Sobic.003G435800	K13600	CAO; chlorophyllide a oxygenase [EC:1.14.13.122]	A09100 Metabolism	B 09108 Metabolism of cofactors and vitamins	C 00860 Porphyrin and chlorophyll metabolism [PATH:ko00860]	-4.0621	3.03877e-16
Sobic.003G024700	K00430	E1.11.1.7; peroxidase [EC:1.11.1.7]	A09100 Metabolism	B 09110 Biosynthesis of other secondary metabolites	C 00940 Phenylpropanoid biosynthesis [PATH:ko00940]	-9.65085	3.71231e-13
Sobic.003G085900	K15925	XYL1; alpha-D-xyloside xylohydrolase [EC:3.2.1.177]	A09180 Brite Hierarchies	B 09191 Unclassified: metabolism	C 99980 Enzymes with EC numbers	-3.90808	7.60664e-15
Sobic.003G423700	K08991	MUS81; crossover junction endonuclease MUS81 [EC:3.1.22.-]	A09120 Genetic Information Processing	B 09124 Replication and repair	C 03440 Homologous recombination [PATH:ko03440]	-3.14794	4.55688e-05
Sobic.003G148600	K09286	EREBP; EREBP-like factor	A09180 Brite Hierarchies	B 09182 Protein families: genetic information processing	C 03000 Transcription factors [BR:ko03000]	-2.83068	1.56167e-07
Sobic.003G282600	K20867	GAUT12S; galacturonosyltransferase 12/13/14/15 [EC:2.4.1.-]	A09180 Brite Hierarchies	B 09181 Protein families: metabolism	C 01003 Glycosyltransferases [BR:ko01003]	-2.00686	4.25503e-05
Sobic.003G127600	K06688	UBE2C, UBC11; ubiquitin-conjugating enzyme E2 C [EC:2.3.2.23]	A09120 Genetic Information Processing	B 09123 Folding, sorting and degradation	C 04120 Ubiquitin mediated proteolysis [PATH:ko04120]	-6.06457	3.62097e-16
Sobic.003G328500	K21777	CCNB; G2/mitotic-specific cyclin-B, other	A09180 Brite Hierarchies	B 09182 Protein families: genetic information processing	C 03032 DNA replication proteins [BR:ko03032]	-11.9934	2.68985e-27
Sobic.003G283500	K17279	REEP5_6; receptor expression-enhancing protein 5/6	A09180 Brite Hierarchies	B 09183 Protein families: signaling and cellular processes	C 04147 Exosome [BR:ko04147]	-2.19249	4.88253e-05
Sobic.003G148500	K01179	E3.2.1.4; endoglucanase [EC:3.2.1.4]	A09100 Metabolism	B 09101 Carbohydrate metabolism	C 00500 Starch and sucrose metabolism [PATH:ko00500]	-7.15144	0.00075637
Sobic.003G341500	K05909	E1.10.3.2; laccase [EC:1.10.3.2]	A09180 Brite Hierarchies	B 09191 Unclassified: metabolism	C 99980 Enzymes with EC numbers	-3.85647	1.05911e-14
Sobic.003G360700	K13508	GPAT; glycerol-3-phosphate acyltransferase [EC:2.3.1.15 2.3.1.198]	A09100 Metabolism	B 09103 Lipid metabolism	C 00561 Glycerolipid metabolism [PATH:ko00561]	-2.25863	2.09855e-06
Sobic.003G385500	K15718	LOX1_5; linoleate 9S-lipoxygenase [EC:1.13.11.58]	A09100 Metabolism	B 09103 Lipid metabolism	C 00591 Linoleic acid metabolism [PATH:ko00591]	-6.45821	1.108e-25
Sobic.003G151900	K00430	E1.11.1.7; peroxidase [EC:1.11.1.7]	A09100 Metabolism	B 09110 Biosynthesis of other secondary metabolites	C 00940 Phenylpropanoid biosynthesis [PATH:ko00940]	-2.24145	9.47228e-06
Sobic.003G356000	K12657	ALDH18A1, P5CS; delta-1-pyrroline-5-carboxylate synthetase [EC:2.7.2.11 1.2.1.41]	A09100 Metabolism	B 09105 Amino acid metabolism	C 00330 Arginine and proline metabolism [PATH:ko00330]	-3.99116	4.4225e-14
Sobic.003G068300	K13065	E2.3.1.133, HCT; shikimate O-hydroxycinnamoyltransferase [EC:2.3.1.133]	A09100 Metabolism	B 09110 Biosynthesis of other secondary metabolites	C 00940 Phenylpropanoid biosynthesis [PATH:ko00940]	-7.84798	1.07971e-05
Sobic.003G345700	K16297	SCPL-II; serine carboxypeptidase-like clade II [EC:3.4.16.-]	A09180 Brite Hierarchies	B 09181 Protein families: metabolism	C 01002 Peptidases and inhibitors [BR:ko01002]	-2.09982	3.67958e-05
Sobic.003G024400	K07198	PRKAA, AMPK; 5'-AMP-activated protein kinase, catalytic alpha subunit [EC:2.7.11.11]	A09130 Environmental Information Processing	B 09132 Signal transduction	C 04371 Apelin signaling pathway [PATH:ko04371]	-3.42502	4.06902e-08
Sobic.003G382400	K08472	MLO; mlo protein	A09180 Brite Hierarchies	B 09183 Protein families: signaling and cellular processes	C 04030 G protein-coupled receptors [BR:ko04030]	-9.29331	2.29373e-11
Sobic.003G121000	K00430	E1.11.1.7; peroxidase [EC:1.11.1.7]	A09100 Metabolism	B 09110 Biosynthesis of other secondary metabolites	C 00940 Phenylpropanoid biosynthesis [PATH:ko00940]	-12.4724	1.90265e-30
Sobic.003G062900	K16297	SCPL-II; serine carboxypeptidase-like clade II [EC:3.4.16.-]	A09180 Brite Hierarchies	B 09181 Protein families: metabolism	C 01002 Peptidases and inhibitors [BR:ko01002]	-2.60536	0.00044505
Sobic.003G132100	K04035	E1.14.13.81, acsF, chlE; magnesium-protoporphyrin IX monomethyl ester (oxidative) cyclase [EC:1.14.13.81]	A09100 Metabolism	B 09108 Metabolism of cofactors and vitamins	C 00860 Porphyrin and chlorophyll metabolism [PATH:ko00860]	-2.39048	4.10179e-07
Sobic.003G314900	K10746	EXO1; exonuclease 1 [EC:3.1.-.-]	A09120 Genetic Information Processing	B 09124 Replication and repair	C 03430 Mismatch repair [PATH:ko03430]	-5.80556	1.25323e-12
Sobic.003G142100	K15920	XYL4; xylan 1,4-beta-xylosidase [EC:3.2.1.37]	A09100 Metabolism	B 09101 Carbohydrate metabolism	C 00520 Amino sugar and nucleotide sugar metabolism [PATH:ko00520]	-2.72558	2.0611e-08
Sobic.003G364200	K01183	E3.2.1.14; chitinase [EC:3.2.1.14]	A09100 Metabolism	B 09101 Carbohydrate metabolism	C 00520 Amino sugar and nucleotide sugar metabolism [PATH:ko00520]	-6.32924	0.0172452
Sobic.003G178700	K15397	KCS; 3-ketoacyl-CoA synthase [EC:2.3.1.199]	A09100 Metabolism	B 09103 Lipid metabolism	C 00062 Fatty acid elongation [PATH:ko00062]	-2.95098	6.61853e-10
Sobic.003G420800	K00006	GPD1; glycerol-3-phosphate dehydrogenase (NAD+) [EC:1.1.1.8]	A09100 Metabolism	B 09103 Lipid metabolism	C 00564 Glycerophospholipid metabolism [PATH:ko00564]	-3.34423	9.58779e-12
Sobic.003G154200	K16297	SCPL-II; serine carboxypeptidase-like clade II [EC:3.4.16.-]	A09180 Brite Hierarchies	B 09181 Protein families: metabolism	C 01002 Peptidases and inhibitors [BR:ko01002]	-2.89111	2.42293e-07
Sobic.003G070600	K11153	RDH12; retinol dehydrogenase 12 [EC:1.1.1.300]	A09100 Metabolism	B 09108 Metabolism of cofactors and vitamins	C 00830 Retinol metabolism [PATH:ko00830]	-4.29725	3.89597e-17
Sobic.003G120900	K00430	E1.11.1.7; peroxidase [EC:1.11.1.7]	A09100 Metabolism	B 09110 Biosynthesis of other secondary metabolites	C 00940 Phenylpropanoid biosynthesis [PATH:ko00940]	-7.90219	7.59244e-06
Sobic.003G343200	K07277	SAM50, TOB55, bamA; outer membrane protein insertion porin family	A09180 Brite Hierarchies	B 09182 Protein families: genetic information processing	C 03029 Mitochondrial biogenesis [BR:ko03029]	-2.02837	0.000503987
Sobic.003G034600	K08850	AURKX; aurora kinase, other [EC:2.7.11.1]	A09180 Brite Hierarchies	B 09181 Protein families: metabolism	C 01001 Protein kinases [BR:ko01001]	-2.57173	2.38378e-06
Sobic.003G325400	K01246	tag; DNA-3-methyladenine glycosylase I [EC:3.2.2.20]	A09120 Genetic Information Processing	B 09124 Replication and repair	C 03410 Base excision repair [PATH:ko03410]	-3.80398	1.32251e-14
Sobic.003G226300	K12349	ASAH2; neutral ceramidase [EC:3.5.1.23]	A09100 Metabolism	B 09103 Lipid metabolism	C 00600 Sphingolipid metabolism [PATH:ko00600]	-6.61548	0.00679855
Sobic.003G352800	K05909	E1.10.3.2; laccase [EC:1.10.3.2]	A09180 Brite Hierarchies	B 09191 Unclassified: metabolism	C 99980 Enzymes with EC numbers	-2.50343	1.70795e-07
Sobic.003G183800	K09422	MYBP; transcription factor MYB, plant	A09180 Brite Hierarchies	B 09182 Protein families: genetic information processing	C 03000 Transcription factors [BR:ko03000]	-2.92237	1.04402e-08
Sobic.003G387600	K10750	CHAF1A; chromatin assembly factor 1 subunit A	A09180 Brite Hierarchies	B 09182 Protein families: genetic information processing	C 03036 Chromosome and associated proteins [BR:ko03036]	-2.86704	5.37316e-08
Sobic.003G013700	K02150	ATPeV1E, ATP6E; V-type H+-transporting ATPase subunit E	A09100 Metabolism	B 09102 Energy metabolism	C 00190 Oxidative phosphorylation [PATH:ko00190]	-4.16113	1.86032e-15
Sobic.003G148400	K01051	E3.1.1.11; pectinesterase [EC:3.1.1.11]	A09100 Metabolism	B 09101 Carbohydrate metabolism	C 00040 Pentose and glucuronate interconversions [PATH:ko00040]	-3.61649	1.95522e-13
Sobic.003G057100	K11254	H4; histone H4	A09150 Organismal Systems	B 09151 Immune system	C 04613 Neutrophil extracellular trap formation [PATH:ko04613]	-2.66698	1.09601e-07
Sobic.003G107200	K12198	CHMP5, VPS60; charged multivesicular body protein 5	A09140 Cellular Processes	B 09141 Transport and catabolism	C 04144 Endocytosis [PATH:ko04144]	-4.89734	4.53902e-14
Sobic.003G274000	K09422	MYBP; transcription factor MYB, plant	A09180 Brite Hierarchies	B 09182 Protein families: genetic information processing	C 03000 Transcription factors [BR:ko03000]	-6.32924	0.0172452
Sobic.003G006100	K13457	RPM1, RPS3; disease resistance protein RPM1	A09150 Organismal Systems	B 09159 Environmental adaptation	0	-3.91187	3.32818e-13
Sobic.003G135400	K07375	TUBB; tubulin beta	A09140 Cellular Processes	B 09141 Transport and catabolism	C 04145 Phagosome [PATH:ko04145]	-2.57236	5.54792e-08
Sobic.003G385900	K15718	LOX1_5; linoleate 9S-lipoxygenase [EC:1.13.11.58]	A09100 Metabolism	B 09103 Lipid metabolism	C 00591 Linoleic acid metabolism [PATH:ko00591]	-3.72216	1.18199e-07
Sobic.003G260700	K16732	PRC1, ASE1, MAP65; Ase1/PRC1/MAP65 family protein	A09180 Brite Hierarchies	B 09182 Protein families: genetic information processing	C 03036 Chromosome and associated proteins [BR:ko03036]	-6.60432	1.94388e-19
Sobic.003G163700	K03676	grxC, GLRX, GLRX2; glutaredoxin 3	A09180 Brite Hierarchies	B 09182 Protein families: genetic information processing	C 03110 Chaperones and folding catalysts [BR:ko03110]	-6.8093	2.45851e-31
Sobic.003G209900	K08912	LHCB1; light-harvesting complex II chlorophyll a/b binding protein 1	A09100 Metabolism	B 09102 Energy metabolism	C 00196 Photosynthesis - antenna proteins [PATH:ko00196]	-5.79185	5.24492e-28
Sobic.003G197200	K05933	E1.14.17.4; aminocyclopropanecarboxylate oxidase [EC:1.14.17.4]	A09100 Metabolism	B 09105 Amino acid metabolism	C 00270 Cysteine and methionine metabolism [PATH:ko00270]	-2.76068	0.000433038
Sobic.003G082600	K13448	CML; calcium-binding protein CML	A09150 Organismal Systems	B 09159 Environmental adaptation	0	-2.8828	3.30091e-09
Sobic.003G191000	K03146	THI4, THI1; cysteine-dependent adenosine diphosphate thiazole synthase [EC:2.4.2.60]	A09100 Metabolism	B 09108 Metabolism of cofactors and vitamins	C 00730 Thiamine metabolism [PATH:ko00730]	-2.10694	8.34476e-06
Sobic.003G187000	K00799	GST, gst; glutathione S-transferase [EC:2.5.1.18]	A09100 Metabolism	B 09106 Metabolism of other amino acids	C 00480 Glutathione metabolism [PATH:ko00480]	-2.31785	1.00862e-06
Sobic.003G208800	K22683	APF2; aspartyl protease family protein [EC:3.4.23.-]	A09180 Brite Hierarchies	B 09181 Protein families: metabolism	C 01002 Peptidases and inhibitors [BR:ko01002]	-6.91951	2.47985e-25
Sobic.003G041700	K08737	MSH6; DNA mismatch repair protein MSH6	A09120 Genetic Information Processing	B 09124 Replication and repair	C 03430 Mismatch repair [PATH:ko03430]	-7.95444	5.36428e-06
Sobic.003G443400	K00006	GPD1; glycerol-3-phosphate dehydrogenase (NAD+) [EC:1.1.1.8]	A09100 Metabolism	B 09103 Lipid metabolism	C 00564 Glycerophospholipid metabolism [PATH:ko00564]	-2.08905	0.000869429
Sobic.003G118100	K17545	ULK4; serine/threonine-protein kinase ULK4 [EC:2.7.11.1]	A09180 Brite Hierarchies	B 09181 Protein families: metabolism	C 01001 Protein kinases [BR:ko01001]	-4.90146	6.50933e-13
Sobic.003G008200	K17362	ACOT13; acyl-coenzyme A thioesterase 13 [EC:3.1.2.-]	A09180 Brite Hierarchies	B 09181 Protein families: metabolism	C 01004 Lipid biosynthesis proteins [BR:ko01004]	-2.65579	2.67433e-05
Sobic.003G163500	K03676	grxC, GLRX, GLRX2; glutaredoxin 3	A09180 Brite Hierarchies	B 09182 Protein families: genetic information processing	C 03110 Chaperones and folding catalysts [BR:ko03110]	-8.80181	8.67886e-36
Sobic.003G352300	K01803	TPI, tpiA; triosephosphate isomerase (TIM) [EC:5.3.1.1]	A09100 Metabolism	B 09101 Carbohydrate metabolism	C 00010 Glycolysis / Gluconeogenesis [PATH:ko00010]	-3.06809	4.77869e-10
Sobic.003G124700	K23678	PQLC2, SLC66A1, LAAT1; solute carrier family 66 (lysosomal lysine-arginine transporter), member 1	A09180 Brite Hierarchies	B 09183 Protein families: signaling and cellular processes	C 02000 Transporters [BR:ko02000]	-2.86865	5.9929e-09
Sobic.003G420100	K13207	CUGBP, BRUNOL, CELF; CUG-BP- and ETR3-like factor	A09180 Brite Hierarchies	B 09182 Protein families: genetic information processing	C 03041 Spliceosome [BR:ko03041]	-3.60792	1.92281e-12
Sobic.K029900.1.	K20547	CHIB; basic endochitinase B [EC:3.2.1.14]	A09100 Metabolism	B 09101 Carbohydrate metabolism	C 00520 Amino sugar and nucleotide sugar metabolism [PATH:ko00520]	#N/A	#N/A
Sobic.009G087000	K02542	MCM6; DNA replication licensing factor MCM6 [EC:3.6.4.12]	A09120 Genetic Information Processing	B 09124 Replication and repair	C 03030 DNA replication [PATH:ko03030]	-4.45603	1.17888e-11
Sobic.009G038800	K10735	GINS4, SLD5; GINS complex subunit 4	A09180 Brite Hierarchies	B 09182 Protein families: genetic information processing	C 03032 DNA replication proteins [BR:ko03032]	-3.82494	0.000536464
Sobic.009G003600	K05894	OPR; 12-oxophytodienoic acid reductase [EC:1.3.1.42]	A09100 Metabolism	B 09103 Lipid metabolism	C 00592 alpha-Linolenic acid metabolism [PATH:ko00592]	-2.62074	4.74256e-05
Sobic.009G033300	K00430	E1.11.1.7; peroxidase [EC:1.11.1.7]	A09100 Metabolism	B 09110 Biosynthesis of other secondary metabolites	C 00940 Phenylpropanoid biosynthesis [PATH:ko00940]	-6.16156	0.0277297
Sobic.009G192700	K10683	BARD1; BRCA1-associated RING domain protein 1	A09120 Genetic Information Processing	B 09124 Replication and repair	C 03440 Homologous recombination [PATH:ko03440]	-3.80016	4.76855e-09
Sobic.009G008800	K16290	XCP; xylem cysteine proteinase [EC:3.4.22.-]	A09180 Brite Hierarchies	B 09181 Protein families: metabolism	C 01002 Peptidases and inhibitors [BR:ko01002]	-4.03354	3.88808e-16
Sobic.009G157000	K13508	GPAT; glycerol-3-phosphate acyltransferase [EC:2.3.1.15 2.3.1.198]	A09100 Metabolism	B 09103 Lipid metabolism	C 00561 Glycerolipid metabolism [PATH:ko00561]	-3.53773	2.16175e-10
Sobic.009G224500	K09422	MYBP; transcription factor MYB, plant	A09180 Brite Hierarchies	B 09182 Protein families: genetic information processing	C 03000 Transcription factors [BR:ko03000]	-5.02253	4.07024e-20
Sobic.009G238600	K14497	PP2C; protein phosphatase 2C [EC:3.1.3.16]	A09130 Environmental Information Processing	B 09132 Signal transduction	C 04016 MAPK signaling pathway - plant [PATH:ko04016]	-2.05254	0.0275955
Sobic.009G184200	K06675	SMC4; structural maintenance of chromosome 4	A09140 Cellular Processes	B 09143 Cell growth and death	C 04111 Cell cycle - yeast [PATH:ko04111]	-5.91038	7.49e-19
Sobic.009G176400	K24544	CYP714C; cytochrome P450 family 714 subfamily C	A09180 Brite Hierarchies	B 09181 Protein families: metabolism	C 00199 Cytochrome P450 [BR:ko00199]	-8.31572	2.87682e-07
Sobic.009G166400	K10737	MCM8; DNA helicase MCM8 [EC:3.6.4.12]	A09180 Brite Hierarchies	B 09182 Protein families: genetic information processing	C 03032 DNA replication proteins [BR:ko03032]	-2.15911	0.000261068
Sobic.009G155050	K14431	TGA; transcription factor TGA	A09130 Environmental Information Processing	B 09132 Signal transduction	C 04075 Plant hormone signal transduction [PATH:ko04075]	-2.48334	6.18345e-05
Sobic.009G234600	K08912	LHCB1; light-harvesting complex II chlorophyll a/b binding protein 1	A09100 Metabolism	B 09102 Energy metabolism	C 00196 Photosynthesis - antenna proteins [PATH:ko00196]	-5.89099	1.10555e-28
Sobic.009G162800	K05909	E1.10.3.2; laccase [EC:1.10.3.2]	A09180 Brite Hierarchies	B 09191 Unclassified: metabolism	C 99980 Enzymes with EC numbers	-3.86355	1.91513e-14
Sobic.009G167500	K11254	H4; histone H4	A09150 Organismal Systems	B 09151 Immune system	C 04613 Neutrophil extracellular trap formation [PATH:ko04613]	-5.26948	6.44554e-21
Sobic.009G088200	K15283	SLC35E1; solute carrier family 35, member E1	A09180 Brite Hierarchies	B 09183 Protein families: signaling and cellular processes	C 02000 Transporters [BR:ko02000]	-7.11186	3.87526e-20
Sobic.009G163100	K10403	KIF22; kinesin family member 22	A09150 Organismal Systems	B 09152 Endocrine system	0	-3.34716	9.69073e-07
Sobic.009G077500	K04125	GA2ox; gibberellin 2beta-dioxygenase [EC:1.14.11.13]	A09100 Metabolism	B 09109 Metabolism of terpenoids and polyketides	C 00904 Diterpenoid biosynthesis [PATH:ko00904]	-10.491	7.7163e-18
Sobic.009G172950	K02541	MCM3; DNA replication licensing factor MCM3 [EC:3.6.4.12]	A09120 Genetic Information Processing	B 09124 Replication and repair	C 03030 DNA replication [PATH:ko03030]	-2.64187	9.21071e-08
Sobic.009G062500	K15283	SLC35E1; solute carrier family 35, member E1	A09180 Brite Hierarchies	B 09183 Protein families: signaling and cellular processes	C 02000 Transporters [BR:ko02000]	-2.36668	2.71183e-06
Sobic.009G165600	K03017	RPB9, POLR2I; DNA-directed RNA polymerase II subunit RPB9	A09120 Genetic Information Processing	B 09121 Transcription	C 03020 RNA polymerase [PATH:ko03020]	-2.53841	8.84419e-05
Sobic.009G137500	K00799	GST, gst; glutathione S-transferase [EC:2.5.1.18]	A09100 Metabolism	B 09106 Metabolism of other amino acids	C 00480 Glutathione metabolism [PATH:ko00480]	-9.14381	1.24662e-10
Sobic.009G129400	K10406	KIFC2_3; kinesin family member C2/C3	A09180 Brite Hierarchies	B 09183 Protein families: signaling and cellular processes	C 04812 Cytoskeleton proteins [BR:ko04812]	-4.50924	5.77171e-14
Sobic.009G231400	K09510	DNAJB4; DnaJ homolog subfamily B member 4	A09180 Brite Hierarchies	B 09182 Protein families: genetic information processing	C 03110 Chaperones and folding catalysts [BR:ko03110]	-2.27274	1.03613e-05
Sobic.009G087100	K06627	CCNA; cyclin-A	A09130 Environmental Information Processing	B 09132 Signal transduction	C 04152 AMPK signaling pathway [PATH:ko04152]	-7.32024	0.000332542
Sobic.009G009200	K15803	GERD; (-)-germacrene D synthase [EC:4.2.3.75]	A09100 Metabolism	B 09109 Metabolism of terpenoids and polyketides	C 00909 Sesquiterpenoid and triterpenoid biosynthesis [PATH:ko00909]	-4.73948	1.25858e-12
Sobic.009G015900	K11251	H2A; histone H2A	A09140 Cellular Processes	B 09143 Cell growth and death	C 04217 Necroptosis [PATH:ko04217]	-2.26186	4.66502e-06
Sobic.009G226800	K10403	KIF22; kinesin family member 22	A09150 Organismal Systems	B 09152 Endocrine system	0	-2.51173	4.02152e-06
Sobic.009G048000	K05761	VIL1; villin 1	A09180 Brite Hierarchies	B 09183 Protein families: signaling and cellular processes	C 04812 Cytoskeleton proteins [BR:ko04812]	-2.28049	2.16494e-06
Sobic.009G069800	K00844	HK; hexokinase [EC:2.7.1.1]	A09100 Metabolism	B 09101 Carbohydrate metabolism	C 00010 Glycolysis / Gluconeogenesis [PATH:ko00010]	-5.1777	8.99024e-22
Sobic.009G250400	K03093	sigI; RNA polymerase sigma factor	A09180 Brite Hierarchies	B 09182 Protein families: genetic information processing	C 03021 Transcription machinery [BR:ko03021]	-3.4887	1.90079e-12
Sobic.009G203200	K01051	E3.1.1.11; pectinesterase [EC:3.1.1.11]	A09100 Metabolism	B 09101 Carbohydrate metabolism	C 00040 Pentose and glucuronate interconversions [PATH:ko00040]	-12.6513	1.13965e-31
Sobic.009G244900	K00559	SMT1, ERG6; sterol 24-C-methyltransferase [EC:2.1.1.41]	A09100 Metabolism	B 09103 Lipid metabolism	C 00100 Steroid biosynthesis [PATH:ko00100]	-4.04204	1.91459e-12
Sobic.009G180200	K07199	PRKAB; 5'-AMP-activated protein kinase, regulatory beta subunit	A09130 Environmental Information Processing	B 09132 Signal transduction	C 04371 Apelin signaling pathway [PATH:ko04371]	-3.36438	4.8409e-12
Sobic.009G069600	K00029	E1.1.1.40, maeB; malate dehydrogenase (oxaloacetate-decarboxylating)(NADP+) [EC:1.1.1.40]	A09100 Metabolism	B 09101 Carbohydrate metabolism	C 00620 Pyruvate metabolism [PATH:ko00620]	-2.22156	1.41381e-05
Sobic.009G162300	K05909	E1.10.3.2; laccase [EC:1.10.3.2]	A09180 Brite Hierarchies	B 09191 Unclassified: metabolism	C 99980 Enzymes with EC numbers	-5.09583	4.64042e-20
Sobic.009G048900	K01082	cysQ, MET22, BPNT1; 3'(2'), 5'-bisphosphate nucleotidase [EC:3.1.3.7]	A09100 Metabolism	B 09102 Energy metabolism	C 00920 Sulfur metabolism [PATH:ko00920]	-8.43085	1.17801e-07
Sobic.009G136000	K16732	PRC1, ASE1, MAP65; Ase1/PRC1/MAP65 family protein	A09180 Brite Hierarchies	B 09182 Protein families: genetic information processing	C 03036 Chromosome and associated proteins [BR:ko03036]	-8.50279	6.62734e-08
Sobic.009G000900	K08241	E2.1.1.141; jasmonate O-methyltransferase [EC:2.1.1.141]	A09100 Metabolism	B 09103 Lipid metabolism	C 00592 alpha-Linolenic acid metabolism [PATH:ko00592]	-2.39925	1.67213e-06
Sobic.009G143500	K15382	SLC50A, SWEET; solute carrier family 50 (sugar transporter)	A09180 Brite Hierarchies	B 09183 Protein families: signaling and cellular processes	C 02000 Transporters [BR:ko02000]	-2.46296	5.0915e-07
Sobic.009G238900	K00031	IDH1, IDH2, icd; isocitrate dehydrogenase [EC:1.1.1.42]	A09100 Metabolism	B 09101 Carbohydrate metabolism	C 00020 Citrate cycle (TCA cycle) [PATH:ko00020]	-2.11703	8.05483e-06
Sobic.009G109300	K02684	PRI1; DNA primase small subunit [EC:2.7.7.102]	A09120 Genetic Information Processing	B 09124 Replication and repair	C 03030 DNA replication [PATH:ko03030]	-2.55694	9.02757e-05
Sobic.009G186500	K00430	E1.11.1.7; peroxidase [EC:1.11.1.7]	A09100 Metabolism	B 09110 Biosynthesis of other secondary metabolites	C 00940 Phenylpropanoid biosynthesis [PATH:ko00940]	-3.63974	1.24239e-07
Sobic.009G144900	K00430	E1.11.1.7; peroxidase [EC:1.11.1.7]	A09100 Metabolism	B 09110 Biosynthesis of other secondary metabolites	C 00940 Phenylpropanoid biosynthesis [PATH:ko00940]	-5.97179	0.0447833
Sobic.009G181500	K21777	CCNB; G2/mitotic-specific cyclin-B, other	A09180 Brite Hierarchies	B 09182 Protein families: genetic information processing	C 03032 DNA replication proteins [BR:ko03032]	-7.90219	7.59244e-06
Sobic.K031400.1.	K02109	ATPF0B, atpF; F-type H+-transporting ATPase subunit b	A09100 Metabolism	B 09102 Energy metabolism	C 00190 Oxidative phosphorylation [PATH:ko00190]	#N/A	#N/A
Sobic.005G122800	K15400	HHT1; omega-hydroxypalmitate O-feruloyl transferase [EC:2.3.1.188]	A09100 Metabolism	B 09103 Lipid metabolism	C 00073 Cutin, suberine and wax biosynthesis [PATH:ko00073]	-2.71353	1.95511e-08
Sobic.005G018900	K05857	PLCD; phosphatidylinositol phospholipase C, delta [EC:3.1.4.11]	A09100 Metabolism	B 09101 Carbohydrate metabolism	C 00562 Inositol phosphate metabolism [PATH:ko00562]	-4.5541	2.09938e-08
Sobic.005G099000	K01183	E3.2.1.14; chitinase [EC:3.2.1.14]	A09100 Metabolism	B 09101 Carbohydrate metabolism	C 00520 Amino sugar and nucleotide sugar metabolism [PATH:ko00520]	-11.0246	4.56895e-21
Sobic.005G110535	K02540	MCM2; DNA replication licensing factor MCM2 [EC:3.6.4.12]	A09120 Genetic Information Processing	B 09124 Replication and repair	C 03030 DNA replication [PATH:ko03030]	-2.88241	9.38776e-08
Sobic.005G044400	K12130	PRR5; pseudo-response regulator 5	A09150 Organismal Systems	B 09159 Environmental adaptation	0	-2.08447	1.11377e-05
Sobic.005G098400	K14484	IAA; auxin-responsive protein IAA	A09130 Environmental Information Processing	B 09132 Signal transduction	C 04075 Plant hormone signal transduction [PATH:ko04075]	-9.82935	4.44133e-14
Sobic.005G002800	K10257	FAD3, FAD7, FAD8, desB; acyl-lipid omega-3 desaturase [EC:1.14.19.25 1.14.19.35 1.14.19.36]	A09180 Brite Hierarchies	B 09181 Protein families: metabolism	C 01004 Lipid biosynthesis proteins [BR:ko01004]	-7.20607	3.12779e-23
Sobic.005G005800	K05909	E1.10.3.2; laccase [EC:1.10.3.2]	A09180 Brite Hierarchies	B 09191 Unclassified: metabolism	C 99980 Enzymes with EC numbers	-5.71013	6.4886e-20
Sobic.005G050400	K08500	SYP6; syntaxin of plants SYP6	A09120 Genetic Information Processing	B 09123 Folding, sorting and degradation	C 04130 SNARE interactions in vesicular transport [PATH:ko04130]	-2.34363	1.62754e-06
Sobic.005G104100	K00430	E1.11.1.7; peroxidase [EC:1.11.1.7]	A09100 Metabolism	B 09110 Biosynthesis of other secondary metabolites	C 00940 Phenylpropanoid biosynthesis [PATH:ko00940]	-5.08109	2.78279e-22
Sobic.005G140001	K08235	E2.4.1.207; xyloglucan:xyloglucosyl transferase [EC:2.4.1.207]	A09180 Brite Hierarchies	B 09191 Unclassified: metabolism	C 99980 Enzymes with EC numbers	-4.80527	1.15749e-11
Sobic.005G035100	K13457	RPM1, RPS3; disease resistance protein RPM1	A09150 Organismal Systems	B 09159 Environmental adaptation	0	-3.28127	4.83618e-08
Sobic.005G156100	K01897	ACSL, fadD; long-chain acyl-CoA synthetase [EC:6.2.1.3]	A09100 Metabolism	B 09103 Lipid metabolism	C 00061 Fatty acid biosynthesis [PATH:ko00061]	-5.17047	1.42996e-22
Sobic.005G147800	K14379	ACP5; tartrate-resistant acid phosphatase type 5 [EC:3.1.3.2]	A09100 Metabolism	B 09108 Metabolism of cofactors and vitamins	C 00740 Riboflavin metabolism [PATH:ko00740]	-5.026	2.09332e-22
Sobic.005G074400	K09580	PDIA1, P4HB; protein disulfide-isomerase A1 [EC:5.3.4.1]	A09120 Genetic Information Processing	B 09123 Folding, sorting and degradation	C 04141 Protein processing in endoplasmic reticulum [PATH:ko04141]	-2.02141	2.04566e-05
Sobic.005G121500	K22418	HSD1; 11beta/17beta-hydroxysteroid dehydrogenase [EC:1.1.1.146 1.1.1.-]	A09180 Brite Hierarchies	B 09191 Unclassified: metabolism	C 99980 Enzymes with EC numbers	-3.06115	4.7723e-10
Sobic.005G218000	K00574	cfa; cyclopropane-fatty-acyl-phospholipid synthase [EC:2.1.1.79]	A09180 Brite Hierarchies	B 09191 Unclassified: metabolism	C 99980 Enzymes with EC numbers	-8.2983	1.14466e-33
Sobic.005G011200	K00430	E1.11.1.7; peroxidase [EC:1.11.1.7]	A09100 Metabolism	B 09110 Biosynthesis of other secondary metabolites	C 00940 Phenylpropanoid biosynthesis [PATH:ko00940]	-10.3615	4.2506e-17
Sobic.005G130100	K15803	GERD; (-)-germacrene D synthase [EC:4.2.3.75]	A09100 Metabolism	B 09109 Metabolism of terpenoids and polyketides	C 00909 Sesquiterpenoid and triterpenoid biosynthesis [PATH:ko00909]	-2.40546	4.21486e-07
Sobic.005G000500	K10398	KIF11, EG5; kinesin family member 11	A09180 Brite Hierarchies	B 09182 Protein families: genetic information processing	C 03036 Chromosome and associated proteins [BR:ko03036]	-3.63241	2.93512e-09
Sobic.005G204000	K03676	grxC, GLRX, GLRX2; glutaredoxin 3	A09180 Brite Hierarchies	B 09182 Protein families: genetic information processing	C 03110 Chaperones and folding catalysts [BR:ko03110]	-10.712	3.62418e-19
Sobic.005G012000	K07198	PRKAA, AMPK; 5'-AMP-activated protein kinase, catalytic alpha subunit [EC:2.7.11.11]	A09130 Environmental Information Processing	B 09132 Signal transduction	C 04371 Apelin signaling pathway [PATH:ko04371]	-6.32175	2.65699e-29
Sobic.005G047100	K10355	ACTF; actin, other eukaryote	A09180 Brite Hierarchies	B 09183 Protein families: signaling and cellular processes	C 04812 Cytoskeleton proteins [BR:ko04812]	-4.16259	1.06226e-16
Sobic.005G145100	K01047	PLA2G, SPLA2; secretory phospholipase A2 [EC:3.1.1.4]	A09100 Metabolism	B 09103 Lipid metabolism	C 00564 Glycerophospholipid metabolism [PATH:ko00564]	-4.98439	2.22862e-13
Sobic.005G093800	K13457	RPM1, RPS3; disease resistance protein RPM1	A09150 Organismal Systems	B 09159 Environmental adaptation	0	-3.02733	6.58557e-07
Sobic.005G110600	K01183	E3.2.1.14; chitinase [EC:3.2.1.14]	A09100 Metabolism	B 09101 Carbohydrate metabolism	C 00520 Amino sugar and nucleotide sugar metabolism [PATH:ko00520]	-5.10341	1.47536e-18
Sobic.005G222400	K05605	HIBCH; 3-hydroxyisobutyryl-CoA hydrolase [EC:3.1.2.4]	A09100 Metabolism	B 09101 Carbohydrate metabolism	C 00640 Propanoate metabolism [PATH:ko00640]	-4.52266	5.61652e-12
Sobic.005G087000	K08916	LHCB5; light-harvesting complex II chlorophyll a/b binding protein 5	A09100 Metabolism	B 09102 Energy metabolism	C 00196 Photosynthesis - antenna proteins [PATH:ko00196]	-2.58353	4.61461e-08
Sobic.005G129600	K16297	SCPL-II; serine carboxypeptidase-like clade II [EC:3.4.16.-]	A09180 Brite Hierarchies	B 09181 Protein families: metabolism	C 01002 Peptidases and inhibitors [BR:ko01002]	-4.25037	2.05776e-15
Sobic.005G203900	K03676	grxC, GLRX, GLRX2; glutaredoxin 3	A09180 Brite Hierarchies	B 09182 Protein families: genetic information processing	C 03110 Chaperones and folding catalysts [BR:ko03110]	-11.2133	3.14056e-22
Sobic.005G144600	K11498	CENPE; centromeric protein E	A09180 Brite Hierarchies	B 09181 Protein families: metabolism	C 01009 Protein phosphatases and associated proteins [BR:ko01009]	-3.37709	1.50549e-06
Sobic.005G003200	K01953	asnB, ASNS; asparagine synthase (glutamine-hydrolysing) [EC:6.3.5.4]	A09100 Metabolism	B 09105 Amino acid metabolism	C 00250 Alanine, aspartate and glutamate metabolism [PATH:ko00250]	-4.85222	1.03819e-20
Sobic.005G146300	K14379	ACP5; tartrate-resistant acid phosphatase type 5 [EC:3.1.3.2]	A09100 Metabolism	B 09108 Metabolism of cofactors and vitamins	C 00740 Riboflavin metabolism [PATH:ko00740]	-4.7897	2.04286e-16
Sobic.005G212400	K13457	RPM1, RPS3; disease resistance protein RPM1	A09150 Organismal Systems	B 09159 Environmental adaptation	0	-4.15921	3.39909e-15
Sobic.005G218100	K00574	cfa; cyclopropane-fatty-acyl-phospholipid synthase [EC:2.1.1.79]	A09180 Brite Hierarchies	B 09191 Unclassified: metabolism	C 99980 Enzymes with EC numbers	-12.0425	1.29806e-27
Sobic.005G186500	K16297	SCPL-II; serine carboxypeptidase-like clade II [EC:3.4.16.-]	A09180 Brite Hierarchies	B 09181 Protein families: metabolism	C 01002 Peptidases and inhibitors [BR:ko01002]	-7.84798	1.07971e-05
Sobic.005G105850	K16296	SCPL-I; serine carboxypeptidase-like clade I [EC:3.4.16.-]	A09180 Brite Hierarchies	B 09181 Protein families: metabolism	C 01002 Peptidases and inhibitors [BR:ko01002]	-6.69358	1.19189e-21
Sobic.005G106700	K19983	EXOC1, SEC3; exocyst complex component 1	A09180 Brite Hierarchies	B 09182 Protein families: genetic information processing	C 04131 Membrane trafficking [BR:ko04131]	-3.11029	3.22412e-05
Sobic.008G162600	K14423	SMO1; plant 4,4-dimethylsterol C-4alpha-methyl-monooxygenase [EC:1.14.18.10]	A09100 Metabolism	B 09103 Lipid metabolism	C 00100 Steroid biosynthesis [PATH:ko00100]	-4.01998	6.70976e-08
Sobic.008G118700	K13447	RBOH; respiratory burst oxidase [EC:1.6.3.- 1.11.1.-]	A09130 Environmental Information Processing	B 09132 Signal transduction	C 04016 MAPK signaling pathway - plant [PATH:ko04016]	-2.84597	2.1863e-06
Sobic.008G148000	K10400	KIF15; kinesin family member 15	A09180 Brite Hierarchies	B 09183 Protein families: signaling and cellular processes	C 04812 Cytoskeleton proteins [BR:ko04812]	-3.58236	7.12339e-10
Sobic.008G117400	K03676	grxC, GLRX, GLRX2; glutaredoxin 3	A09180 Brite Hierarchies	B 09182 Protein families: genetic information processing	C 03110 Chaperones and folding catalysts [BR:ko03110]	-2.56639	5.17944e-07
Sobic.008G117800	K03676	grxC, GLRX, GLRX2; glutaredoxin 3	A09180 Brite Hierarchies	B 09182 Protein families: genetic information processing	C 03110 Chaperones and folding catalysts [BR:ko03110]	-3.17765	5.76272e-08
Sobic.008G189500	K22390	ACP7; acid phosphatase type 7	A09180 Brite Hierarchies	B 09191 Unclassified: metabolism	C 99999 Others	-5.57103	4.15137e-25
Sobic.008G123000	K10406	KIFC2_3; kinesin family member C2/C3	A09180 Brite Hierarchies	B 09183 Protein families: signaling and cellular processes	C 04812 Cytoskeleton proteins [BR:ko04812]	-4.05075	1.79627e-06
Sobic.008G000800	K10398	KIF11, EG5; kinesin family member 11	A09180 Brite Hierarchies	B 09182 Protein families: genetic information processing	C 03036 Chromosome and associated proteins [BR:ko03036]	-3.52922	2.76893e-10
Sobic.008G118000	K03676	grxC, GLRX, GLRX2; glutaredoxin 3	A09180 Brite Hierarchies	B 09182 Protein families: genetic information processing	C 03110 Chaperones and folding catalysts [BR:ko03110]	-3.34568	4.16059e-10
Sobic.008G181400	K19706	FAH; dihydroceramide fatty acyl 2-hydroxylase [EC:1.14.18.7]	A09180 Brite Hierarchies	B 09191 Unclassified: metabolism	C 99980 Enzymes with EC numbers	-3.08991	5.17491e-10
Sobic.008G125700	K00770	E2.4.2.24; 1,4-beta-D-xylan synthase [EC:2.4.2.24]	A09100 Metabolism	B 09101 Carbohydrate metabolism	C 00520 Amino sugar and nucleotide sugar metabolism [PATH:ko00520]	-5.38574	8.52018e-15
Sobic.008G004800	K00522	FTH1; ferritin heavy chain [EC:1.16.3.2]	A09140 Cellular Processes	B 09143 Cell growth and death	C 04216 Ferroptosis [PATH:ko04216]	-2.30071	1.1713e-06
Sobic.008G117300	K03676	grxC, GLRX, GLRX2; glutaredoxin 3	A09180 Brite Hierarchies	B 09182 Protein families: genetic information processing	C 03110 Chaperones and folding catalysts [BR:ko03110]	-10.5601	2.90268e-18
Sobic.008G168100	K09338	HD-ZIP; homeobox-leucine zipper protein	A09180 Brite Hierarchies	B 09182 Protein families: genetic information processing	C 03000 Transcription factors [BR:ko03000]	-2.40664	1.35338e-06
Sobic.008G037300	K06910	PEBP, TFS1; phosphatidylethanolamine-binding protein	A09180 Brite Hierarchies	B 09181 Protein families: metabolism	C 01002 Peptidases and inhibitors [BR:ko01002]	-2.00654	0.0104196
Sobic.008G020500	K06628	CDC45; cell division control protein 45	A09140 Cellular Processes	B 09143 Cell growth and death	C 04110 Cell cycle [PATH:ko04110]	-8.00487	3.82591e-06
Sobic.008G066700	K00430	E1.11.1.7; peroxidase [EC:1.11.1.7]	A09100 Metabolism	B 09110 Biosynthesis of other secondary metabolites	C 00940 Phenylpropanoid biosynthesis [PATH:ko00940]	-6.85422	0.00276094
Sobic.008G171900	K10406	KIFC2_3; kinesin family member C2/C3	A09180 Brite Hierarchies	B 09183 Protein families: signaling and cellular processes	C 04812 Cytoskeleton proteins [BR:ko04812]	-10.4552	1.20389e-17
Sobic.008G022500	K13648	GAUT; alpha-1,4-galacturonosyltransferase [EC:2.4.1.43]	A09100 Metabolism	B 09101 Carbohydrate metabolism	C 00520 Amino sugar and nucleotide sugar metabolism [PATH:ko00520]	-2.95828	4.58609e-09
Sobic.008G063500	K02701	psaN; photosystem I subunit PsaN	A09100 Metabolism	B 09102 Energy metabolism	C 00195 Photosynthesis [PATH:ko00195]	-2.41053	3.285e-07
Sobic.008G160300	K05576	ndhE; NAD(P)H-quinone oxidoreductase subunit 4L [EC:7.1.1.2]	A09100 Metabolism	B 09102 Energy metabolism	C 00190 Oxidative phosphorylation [PATH:ko00190]	-3.27079	0.000132433
Sobic.008G047000	K10355	ACTF; actin, other eukaryote	A09180 Brite Hierarchies	B 09183 Protein families: signaling and cellular processes	C 04812 Cytoskeleton proteins [BR:ko04812]	-2.67494	2.14481e-08
Sobic.008G178800	K00549	metE; 5-methyltetrahydropteroyltriglutamate--homocysteine methyltransferase [EC:2.1.1.14]	A09100 Metabolism	B 09105 Amino acid metabolism	C 00270 Cysteine and methionine metabolism [PATH:ko00270]	-2.64346	2.31652e-08
Sobic.008G075200	K01627	kdsA; 2-dehydro-3-deoxyphosphooctonate aldolase (KDO 8-P synthase) [EC:2.5.1.55]	A09100 Metabolism	B 09107 Glycan biosynthesis and metabolism	C 00540 Lipopolysaccharide biosynthesis [PATH:ko00540]	-2.41912	3.84758e-07
Sobic.008G114500	K11251	H2A; histone H2A	A09140 Cellular Processes	B 09143 Cell growth and death	C 04217 Necroptosis [PATH:ko04217]	-2.24957	1.06091e-05
Sobic.008G157100	K25784	#N/A	#N/A	#N/A	#N/A	-7.23109	1.04315e-35
Sobic.008G023300	K13457	RPM1, RPS3; disease resistance protein RPM1	A09150 Organismal Systems	B 09159 Environmental adaptation	0	-3.68474	1.64895e-07
Sobic.008G117600	K03676	grxC, GLRX, GLRX2; glutaredoxin 3	A09180 Brite Hierarchies	B 09182 Protein families: genetic information processing	C 03110 Chaperones and folding catalysts [BR:ko03110]	-10.634	1.07158e-18
Sobic.008G112200	K09422	MYBP; transcription factor MYB, plant	A09180 Brite Hierarchies	B 09182 Protein families: genetic information processing	C 03000 Transcription factors [BR:ko03000]	-4.64245	9.26795e-15
Sobic.008G032000	K07198	PRKAA, AMPK; 5'-AMP-activated protein kinase, catalytic alpha subunit [EC:2.7.11.11]	A09130 Environmental Information Processing	B 09132 Signal transduction	C 04371 Apelin signaling pathway [PATH:ko04371]	-5.16999	2.15319e-19
Sobic.008G130800	K13508	GPAT; glycerol-3-phosphate acyltransferase [EC:2.3.1.15 2.3.1.198]	A09100 Metabolism	B 09103 Lipid metabolism	C 00561 Glycerolipid metabolism [PATH:ko00561]	-4.25095	6.42497e-09
Sobic.008G123400	K11491	NCAPD3; condensin-2 complex subunit D3	A09180 Brite Hierarchies	B 09182 Protein families: genetic information processing	C 03036 Chromosome and associated proteins [BR:ko03036]	-2.41994	0.00222213
Sobic.008G156900	K14484	IAA; auxin-responsive protein IAA	A09130 Environmental Information Processing	B 09132 Signal transduction	C 04075 Plant hormone signal transduction [PATH:ko04075]	-2.24842	2.06117e-06
Sobic.008G129200	K02210	MCM7, CDC47; DNA replication licensing factor MCM7 [EC:3.6.4.12]	A09120 Genetic Information Processing	B 09124 Replication and repair	C 03030 DNA replication [PATH:ko03030]	-3.39389	8.00041e-09
Sobic.004G102200	K09874	NIP; aquaporin NIP	A09180 Brite Hierarchies	B 09183 Protein families: signaling and cellular processes	C 02000 Transporters [BR:ko02000]	-5.35712	1.11318e-23
Sobic.004G011700	K09490	HSPA5, BIP; endoplasmic reticulum chaperone BiP [EC:3.6.4.10]	A09120 Genetic Information Processing	B 09123 Folding, sorting and degradation	C 03060 Protein export [PATH:ko03060]	-2.07889	1.15693e-05
Sobic.004G133500	K15382	SLC50A, SWEET; solute carrier family 50 (sugar transporter)	A09180 Brite Hierarchies	B 09183 Protein families: signaling and cellular processes	C 02000 Transporters [BR:ko02000]	-2.15626	1.07768e-05
Sobic.004G293100	K22904	PLPP6; presqualene diphosphate phosphatase [EC:3.1.3.-]	A09180 Brite Hierarchies	B 09191 Unclassified: metabolism	C 99980 Enzymes with EC numbers	-2.30031	6.37161e-05
Sobic.004G156200	K02324	POLE; DNA polymerase epsilon subunit 1 [EC:2.7.7.7]	A09120 Genetic Information Processing	B 09124 Replication and repair	C 03030 DNA replication [PATH:ko03030]	-2.30792	1.4777e-05
Sobic.004G013500	K00963	UGP2, galU, galF; UTP--glucose-1-phosphate uridylyltransferase [EC:2.7.7.9]	A09100 Metabolism	B 09101 Carbohydrate metabolism	C 00040 Pentose and glucuronate interconversions [PATH:ko00040]	-12.2683	4.39865e-29
Sobic.004G231700	K09422	MYBP; transcription factor MYB, plant	A09180 Brite Hierarchies	B 09182 Protein families: genetic information processing	C 03000 Transcription factors [BR:ko03000]	-3.64982	4.63274e-08
Sobic.004G259101	K12462	ARHGDI, RHOGDI; Rho GDP-dissociation inhibitor	A09150 Organismal Systems	B 09155 Excretory system	0	-3.85366	1.99191e-13
Sobic.004G038500	K21842	EFR3; protein EFR3	A09180 Brite Hierarchies	B 09182 Protein families: genetic information processing	C 04131 Membrane trafficking [BR:ko04131]	-2.42653	0.000561808
Sobic.004G271300	K03164	TOP2; DNA topoisomerase II [EC:5.6.2.2]	A09160 Human Diseases	B 09176 Drug resistance: antineoplastic	C 01524 Platinum drug resistance [PATH:ko01524]	-4.3886	1.55131e-16
Sobic.004G262100	K00021	HMGCR; hydroxymethylglutaryl-CoA reductase (NADPH) [EC:1.1.1.34]	A09100 Metabolism	B 09109 Metabolism of terpenoids and polyketides	C 00900 Terpenoid backbone biosynthesis [PATH:ko00900]	-3.46715	9.91409e-06
Sobic.004G335500	K16297	SCPL-II; serine carboxypeptidase-like clade II [EC:3.4.16.-]	A09180 Brite Hierarchies	B 09181 Protein families: metabolism	C 01002 Peptidases and inhibitors [BR:ko01002]	-4.46922	3.68503e-19
Sobic.004G313900	K09338	HD-ZIP; homeobox-leucine zipper protein	A09180 Brite Hierarchies	B 09182 Protein families: genetic information processing	C 03000 Transcription factors [BR:ko03000]	-3.38506	2.76893e-10
Sobic.004G019100	K14175	NES1; (3S,6E)-nerolidol synthase [EC:4.2.3.48]	A09100 Metabolism	B 09109 Metabolism of terpenoids and polyketides	C 00909 Sesquiterpenoid and triterpenoid biosynthesis [PATH:ko00909]	-5.3186	2.83403e-15
Sobic.004G268500	K09840	NCED; 9-cis-epoxycarotenoid dioxygenase [EC:1.13.11.51]	A09100 Metabolism	B 09109 Metabolism of terpenoids and polyketides	C 00906 Carotenoid biosynthesis [PATH:ko00906]	-4.27397	6.88228e-18
Sobic.004G317200	K20718	ER; LRR receptor-like serine/threonine-protein kinase ERECTA [EC:2.7.11.1]	A09130 Environmental Information Processing	B 09132 Signal transduction	C 04016 MAPK signaling pathway - plant [PATH:ko04016]	-5.35619	2.57392e-20
Sobic.004G310400	K11982	RNF115_126; E3 ubiquitin-protein ligase RNF115/126 [EC:2.3.2.27]	A09180 Brite Hierarchies	B 09182 Protein families: genetic information processing	C 04131 Membrane trafficking [BR:ko04131]	-4.23873	3.98192e-07
Sobic.004G205300	K11251	H2A; histone H2A	A09140 Cellular Processes	B 09143 Cell growth and death	C 04217 Necroptosis [PATH:ko04217]	-6.02308	1.75588e-17
Sobic.004G232300	K17098	ANNAT; annexin D	A09180 Brite Hierarchies	B 09193 Unclassified: signaling and cellular processes	C 99992 Structural proteins	-3.27059	1.92692e-11
Sobic.004G235801	K08272	CAB39, MO25; calcium binding protein 39	A09130 Environmental Information Processing	B 09132 Signal transduction	C 04152 AMPK signaling pathway [PATH:ko04152]	-3.35539	7.66521e-05
Sobic.004G223100	K14492	ARR-A; two-component response regulator ARR-A family	A09130 Environmental Information Processing	B 09132 Signal transduction	C 04075 Plant hormone signal transduction [PATH:ko04075]	-8.46727	8.83342e-08
Sobic.004G309000	K01176	AMY, amyA, malS; alpha-amylase [EC:3.2.1.1]	A09100 Metabolism	B 09101 Carbohydrate metabolism	C 00500 Starch and sucrose metabolism [PATH:ko00500]	-8.1906	7.30875e-07
Sobic.004G222000	K09872	PIP; aquaporin PIP	A09180 Brite Hierarchies	B 09183 Protein families: signaling and cellular processes	C 02000 Transporters [BR:ko02000]	-3.94088	1.61315e-15
Sobic.004G050200	K13082	DFR; bifunctional dihydroflavonol 4-reductase/flavanone 4-reductase [EC:1.1.1.219 1.1.1.234]	A09100 Metabolism	B 09110 Biosynthesis of other secondary metabolites	C 00941 Flavonoid biosynthesis [PATH:ko00941]	-3.69462	3.0165e-08
Sobic.004G126700	K08235	E2.4.1.207; xyloglucan:xyloglucosyl transferase [EC:2.4.1.207]	A09180 Brite Hierarchies	B 09191 Unclassified: metabolism	C 99980 Enzymes with EC numbers	-9.05087	3.04241e-10
Sobic.004G333600	K07964	HPSE; heparanase [EC:3.2.1.166]	A09100 Metabolism	B 09107 Glycan biosynthesis and metabolism	C 00531 Glycosaminoglycan degradation [PATH:ko00531]	-3.71993	8.22612e-14
Sobic.004G105100	K00430	E1.11.1.7; peroxidase [EC:1.11.1.7]	A09100 Metabolism	B 09110 Biosynthesis of other secondary metabolites	C 00940 Phenylpropanoid biosynthesis [PATH:ko00940]	-7.61325	1.3122e-32
Sobic.004G265400	K11252	H2B; histone H2B	A09150 Organismal Systems	B 09151 Immune system	C 04613 Neutrophil extracellular trap formation [PATH:ko04613]	-2.34368	2.13478e-06
Sobic.004G274900	K11855	USP36_42; ubiquitin carboxyl-terminal hydrolase 36/42 [EC:3.4.19.12]	A09180 Brite Hierarchies	B 09181 Protein families: metabolism	C 01002 Peptidases and inhibitors [BR:ko01002]	-2.06764	0.000232098
Sobic.004G274600	K05658	ABCB1, CD243; ATP-binding cassette, subfamily B (MDR/TAP), member 1 [EC:7.6.2.2]	A09130 Environmental Information Processing	B 09131 Membrane transport	C 02010 ABC transporters [PATH:ko02010]	-5.64888	9.06114e-25
Sobic.004G077100	K02178	BUB1; checkpoint serine/threonine-protein kinase [EC:2.7.11.1]	A09140 Cellular Processes	B 09143 Cell growth and death	C 04110 Cell cycle [PATH:ko04110]	-7.54134	6.84272e-05
Sobic.004G019300	K14175	NES1; (3S,6E)-nerolidol synthase [EC:4.2.3.48]	A09100 Metabolism	B 09109 Metabolism of terpenoids and polyketides	C 00909 Sesquiterpenoid and triterpenoid biosynthesis [PATH:ko00909]	-10.7044	4.40948e-19
Sobic.004G248100	K01179	E3.2.1.4; endoglucanase [EC:3.2.1.4]	A09100 Metabolism	B 09101 Carbohydrate metabolism	C 00500 Starch and sucrose metabolism [PATH:ko00500]	-11.2133	3.14056e-22
Sobic.004G342000	K15404	K15404, CER1; aldehyde decarbonylase [EC:4.1.99.5]	A09100 Metabolism	B 09103 Lipid metabolism	C 00073 Cutin, suberine and wax biosynthesis [PATH:ko00073]	-8.10072	1.9553e-06
Sobic.004G156900	K03676	grxC, GLRX, GLRX2; glutaredoxin 3	A09180 Brite Hierarchies	B 09182 Protein families: genetic information processing	C 03110 Chaperones and folding catalysts [BR:ko03110]	-9.95007	9.66253e-15
Sobic.004G257600	K20027	ZDHHC1_11; palmitoyltransferase ZDHHC1/11 [EC:2.3.1.225]	A09180 Brite Hierarchies	B 09182 Protein families: genetic information processing	C 04131 Membrane trafficking [BR:ko04131]	-4.11724	6.40745e-10
Sobic.004G357600	K00695	SUS; sucrose synthase [EC:2.4.1.13]	A09100 Metabolism	B 09101 Carbohydrate metabolism	C 00500 Starch and sucrose metabolism [PATH:ko00500]	-3.38143	5.71873e-11
Sobic.004G312400	K02365	ESP1; separase [EC:3.4.22.49]	A09140 Cellular Processes	B 09143 Cell growth and death	C 04110 Cell cycle [PATH:ko04110]	-2.65286	3.67222e-06
Sobic.004G189600	K01922	PPCS, COAB; phosphopantothenate---cysteine ligase (ATP) [EC:6.3.2.51]	A09100 Metabolism	B 09108 Metabolism of cofactors and vitamins	C 00770 Pantothenate and CoA biosynthesis [PATH:ko00770]	-5.54494	1.18334e-23
Sobic.004G261800	K00895	pfp, PFP; diphosphate-dependent phosphofructokinase [EC:2.7.1.90]	A09100 Metabolism	B 09101 Carbohydrate metabolism	C 00010 Glycolysis / Gluconeogenesis [PATH:ko00010]	-3.06422	2.64121e-10
Sobic.004G036100	K21483	SAMT; salicylate 1-O-methyltransferase [EC:2.1.1.274]	A09180 Brite Hierarchies	B 09191 Unclassified: metabolism	C 99980 Enzymes with EC numbers	-5.21056	3.66595e-23
Sobic.004G024400	K21444	PCBP3_4; poly(rC)-binding protein 3/4	A09180 Brite Hierarchies	B 09182 Protein families: genetic information processing	C 03019 Messenger RNA biogenesis [BR:ko03019]	-3.66491	4.02421e-08
Sobic.004G279601	K11254	H4; histone H4	A09150 Organismal Systems	B 09151 Immune system	C 04613 Neutrophil extracellular trap formation [PATH:ko04613]	-5.33743	1.1297e-19
Sobic.004G302700	K25796	#N/A	#N/A	#N/A	#N/A	-3.15134	0.00101348
Sobic.004G336500	K14484	IAA; auxin-responsive protein IAA	A09130 Environmental Information Processing	B 09132 Signal transduction	C 04075 Plant hormone signal transduction [PATH:ko04075]	-7.15144	0.00075637
Sobic.004G170500	K11253	H3; histone H3	A09150 Organismal Systems	B 09151 Immune system	C 04613 Neutrophil extracellular trap formation [PATH:ko04613]	-2.93739	2.34989e-08
Sobic.004G056900	K08907	LHCA1; light-harvesting complex I chlorophyll a/b binding protein 1	A09100 Metabolism	B 09102 Energy metabolism	C 00196 Photosynthesis - antenna proteins [PATH:ko00196]	-2.2078	2.91323e-06
Sobic.004G157100	K15382	SLC50A, SWEET; solute carrier family 50 (sugar transporter)	A09180 Brite Hierarchies	B 09183 Protein families: signaling and cellular processes	C 02000 Transporters [BR:ko02000]	-5.58936	5.26837e-16
Sobic.004G095200	K02365	ESP1; separase [EC:3.4.22.49]	A09140 Cellular Processes	B 09143 Cell growth and death	C 04110 Cell cycle [PATH:ko04110]	-3.16567	1.73658e-05
Sobic.004G019400	K14175	NES1; (3S,6E)-nerolidol synthase [EC:4.2.3.48]	A09100 Metabolism	B 09109 Metabolism of terpenoids and polyketides	C 00909 Sesquiterpenoid and triterpenoid biosynthesis [PATH:ko00909]	-6.61001	1.81418e-19
Sobic.004G190500	K15378	SLC45A1_2_4; solute carrier family 45, member 1/2/4	A09180 Brite Hierarchies	B 09183 Protein families: signaling and cellular processes	C 02000 Transporters [BR:ko02000]	-10.5173	5.57708e-18
Sobic.004G238500	K10960	chlP, bchP; geranylgeranyl diphosphate/geranylgeranyl-bacteriochlorophyllide a reductase [EC:1.3.1.83 1.3.1.111]	A09100 Metabolism	B 09108 Metabolism of cofactors and vitamins	C 00860 Porphyrin and chlorophyll metabolism [PATH:ko00860]	-2.69283	1.2792e-08
Sobic.004G238700	K13680	CSLA; beta-mannan synthase [EC:2.4.1.32]	A09180 Brite Hierarchies	B 09181 Protein families: metabolism	C 01003 Glycosyltransferases [BR:ko01003]	-3.84084	2.61737e-10
Sobic.004G004800	K01193	INV, sacA; beta-fructofuranosidase [EC:3.2.1.26]	A09100 Metabolism	B 09101 Carbohydrate metabolism	C 00052 Galactose metabolism [PATH:ko00052]	-2.31497	1.31204e-06
Sobic.004G025900	K08235	E2.4.1.207; xyloglucan:xyloglucosyl transferase [EC:2.4.1.207]	A09180 Brite Hierarchies	B 09191 Unclassified: metabolism	C 99980 Enzymes with EC numbers	-4.03172	2.90695e-07
Sobic.004G152900	K01255	CARP, pepA; leucyl aminopeptidase [EC:3.4.11.1]	A09100 Metabolism	B 09106 Metabolism of other amino acids	C 00480 Glutathione metabolism [PATH:ko00480]	-2.1392	0.0499121
Sobic.004G318100	K13800	CMPK1, UMPK; UMP-CMP kinase [EC:2.7.4.14]	A09100 Metabolism	B 09104 Nucleotide metabolism	C 00240 Pyrimidine metabolism [PATH:ko00240]	-2.51376	1.34484e-07
Sobic.004G329000	K16297	SCPL-II; serine carboxypeptidase-like clade II [EC:3.4.16.-]	A09180 Brite Hierarchies	B 09181 Protein families: metabolism	C 01002 Peptidases and inhibitors [BR:ko01002]	-5.69678	2.6537e-21
Sobic.004G227900	K20628	exlX; expansin	A09180 Brite Hierarchies	B 09191 Unclassified: metabolism	C 99981 Carbohydrate metabolism	-10.9685	1.03819e-20
Sobic.004G099600	K14484	IAA; auxin-responsive protein IAA	A09130 Environmental Information Processing	B 09132 Signal transduction	C 04075 Plant hormone signal transduction [PATH:ko04075]	-3.27019	1.31957e-07
Sobic.004G355500	K10739	RFA2, RPA2; replication factor A2	A09120 Genetic Information Processing	B 09124 Replication and repair	C 03030 DNA replication [PATH:ko03030]	-5.10461	4.92169e-14
Sobic.004G075800	K05016	CLCN7; chloride channel 7	A09180 Brite Hierarchies	B 09181 Protein families: metabolism	C 01009 Protein phosphatases and associated proteins [BR:ko01009]	-2.02597	2.277e-05
Sobic.004G198800	K01113	phoD; alkaline phosphatase D [EC:3.1.3.1]	A09100 Metabolism	B 09108 Metabolism of cofactors and vitamins	C 00790 Folate biosynthesis [PATH:ko00790]	-2.83616	7.74712e-05
Sobic.004G306800	K24166	ARMC6; armadillo repeat-containing protein 6	A09180 Brite Hierarchies	B 09183 Protein families: signaling and cellular processes	C 04990 Domain-containing proteins not elsewhere classified [BR:ko04990]	-2.07499	8.3635e-05
Sobic.004G064700	K19600	TUB, TULP; tubby and related proteins	A09180 Brite Hierarchies	B 09183 Protein families: signaling and cellular processes	C 04990 Domain-containing proteins not elsewhere classified [BR:ko04990]	-6.73978	0.0043009
Sobic.004G341300	K15397	KCS; 3-ketoacyl-CoA synthase [EC:2.3.1.199]	A09100 Metabolism	B 09103 Lipid metabolism	C 00062 Fatty acid elongation [PATH:ko00062]	-2.67708	1.65576e-07
Sobic.004G157300	K18696	GDE1; glycerophosphodiester phosphodiesterase [EC:3.1.4.46]	A09100 Metabolism	B 09103 Lipid metabolism	C 00564 Glycerophospholipid metabolism [PATH:ko00564]	-2.1049	1.43167e-05
Sobic.004G164200	K07213	ATOX1, ATX1, copZ, golB; copper chaperone	A09150 Organismal Systems	B 09154 Digestive system	0	-2.25547	1.9736e-06
Sobic.004G036200	K21483	SAMT; salicylate 1-O-methyltransferase [EC:2.1.1.274]	A09180 Brite Hierarchies	B 09191 Unclassified: metabolism	C 99980 Enzymes with EC numbers	-2.85738	3.35627e-07
Sobic.004G011566	K03781	katE, CAT, catB, srpA; catalase [EC:1.11.1.6]	A09100 Metabolism	B 09101 Carbohydrate metabolism	C 00630 Glyoxylate and dicarboxylate metabolism [PATH:ko00630]	-2.76619	5.24481e-09
Sobic.004G179000	K00660	CHS; chalcone synthase [EC:2.3.1.74]	A09100 Metabolism	B 09110 Biosynthesis of other secondary metabolites	C 00941 Flavonoid biosynthesis [PATH:ko00941]	-5.75322	0.116567
Sobic.004G288700	K09872	PIP; aquaporin PIP	A09180 Brite Hierarchies	B 09183 Protein families: signaling and cellular processes	C 02000 Transporters [BR:ko02000]	-2.66646	1.78973e-08
Sobic.004G023700	K00555	TRMT1, trm1; tRNA (guanine26-N2/guanine27-N2)-dimethyltransferase [EC:2.1.1.215 2.1.1.216]	A09180 Brite Hierarchies	B 09182 Protein families: genetic information processing	C 03016 Transfer RNA biogenesis [BR:ko03016]	-2.43784	6.75582e-07
Sobic.004G115600	K09273	UBTF; upstream-binding transcription factor	A09180 Brite Hierarchies	B 09182 Protein families: genetic information processing	C 03000 Transcription factors [BR:ko03000]	-4.36055	2.21771e-14
Sobic.004G325900	K16055	TPS; trehalose 6-phosphate synthase/phosphatase [EC:2.4.1.15 3.1.3.12]	A09100 Metabolism	B 09101 Carbohydrate metabolism	C 00500 Starch and sucrose metabolism [PATH:ko00500]	-3.83362	6.47398e-15
Sobic.004G191800	K09422	MYBP; transcription factor MYB, plant	A09180 Brite Hierarchies	B 09182 Protein families: genetic information processing	C 03000 Transcription factors [BR:ko03000]	-5.22951	5.43781e-19
Sobic.004G247500	K17991	PXG; peroxygenase [EC:1.11.2.3]	A09100 Metabolism	B 09103 Lipid metabolism	C 00073 Cutin, suberine and wax biosynthesis [PATH:ko00073]	-7.39777	0.000223575
Sobic.004G231300	K23870	QUA2, TSD2; putative pectin methyltransferase [EC:2.1.1.-]	A09180 Brite Hierarchies	B 09191 Unclassified: metabolism	C 99980 Enzymes with EC numbers	-2.52292	1.64426e-07
Sobic.004G075900	K13680	CSLA; beta-mannan synthase [EC:2.4.1.32]	A09180 Brite Hierarchies	B 09181 Protein families: metabolism	C 01003 Glycosyltransferases [BR:ko01003]	-3.59718	7.21984e-12
Sobic.004G219800	K09422	MYBP; transcription factor MYB, plant	A09180 Brite Hierarchies	B 09182 Protein families: genetic information processing	C 03000 Transcription factors [BR:ko03000]	-6.16156	0.0277297
Sobic.004G071401	K03234	EEF2; elongation factor 2	A09130 Environmental Information Processing	B 09132 Signal transduction	C 04152 AMPK signaling pathway [PATH:ko04152]	-4.08689	0.000115561
Sobic.004G036800	K19893	GN5_6; glucan endo-1,3-beta-glucosidase 5/6 [EC:3.2.1.39]	A09100 Metabolism	B 09101 Carbohydrate metabolism	C 00500 Starch and sucrose metabolism [PATH:ko00500]	-2.01796	3.33081e-05
Sobic.004G288500	K15398	CYP86A4S; fatty acid omega-hydroxylase [EC:1.14.-.-]	A09100 Metabolism	B 09103 Lipid metabolism	C 00073 Cutin, suberine and wax biosynthesis [PATH:ko00073]	-5.03709	4.35235e-21
Sobic.004G205100	K00134	GAPDH, gapA; glyceraldehyde 3-phosphate dehydrogenase (phosphorylating) [EC:1.2.1.12]	A09100 Metabolism	B 09101 Carbohydrate metabolism	C 00010 Glycolysis / Gluconeogenesis [PATH:ko00010]	-3.51698	3.5199e-13
Sobic.004G187600	K10664	ATL6S; E3 ubiquitin-protein ligase ATL6/9/15/31/42/55 [EC:2.3.2.27]	A09180 Brite Hierarchies	B 09182 Protein families: genetic information processing	C 04121 Ubiquitin system [BR:ko04121]	-6.47945	0.0107979
Sobic.004G032900	K06632	WEE1; wee1-like protein kinase [EC:2.7.11.1]	A09140 Cellular Processes	B 09143 Cell growth and death	C 04110 Cell cycle [PATH:ko04110]	-7.79164	1.54529e-05
Sobic.007G077001	K09286	EREBP; EREBP-like factor	A09180 Brite Hierarchies	B 09182 Protein families: genetic information processing	C 03000 Transcription factors [BR:ko03000]	-5.75322	0.116567
Sobic.007G212700	K24345	KIC; calcium-binding protein KIC and related proteins	A09180 Brite Hierarchies	B 09183 Protein families: signaling and cellular processes	C 04812 Cytoskeleton proteins [BR:ko04812]	-7.54134	6.84272e-05
Sobic.007G139500	K00850	pfkA, PFK; 6-phosphofructokinase 1 [EC:2.7.1.11]	A09100 Metabolism	B 09101 Carbohydrate metabolism	C 00010 Glycolysis / Gluconeogenesis [PATH:ko00010]	-2.13229	4.16455e-05
Sobic.007G071600	K03921	FAB2, SSI2, desA1; acyl-[acyl-carrier-protein] desaturase [EC:1.14.19.2 1.14.19.11 1.14.19.26]	A09100 Metabolism	B 09103 Lipid metabolism	C 00061 Fatty acid biosynthesis [PATH:ko00061]	-11.0428	3.65543e-21
Sobic.007G136900	K08910	LHCA4; light-harvesting complex I chlorophyll a/b binding protein 4	A09100 Metabolism	B 09102 Energy metabolism	C 00196 Photosynthesis - antenna proteins [PATH:ko00196]	-3.8564	2.79619e-15
Sobic.007G097000	K06670	SCC1, MCD1, RAD21; cohesin complex subunit SCC1	A09140 Cellular Processes	B 09143 Cell growth and death	C 04110 Cell cycle [PATH:ko04110]	-8.66837	1.24037e-08
Sobic.007G094900	K08235	E2.4.1.207; xyloglucan:xyloglucosyl transferase [EC:2.4.1.207]	A09180 Brite Hierarchies	B 09191 Unclassified: metabolism	C 99980 Enzymes with EC numbers	-3.61204	1.80404e-12
Sobic.007G186400	K13457	RPM1, RPS3; disease resistance protein RPM1	A09150 Organismal Systems	B 09159 Environmental adaptation	0	-2.53507	0.00115619
Sobic.007G149600	K11252	H2B; histone H2B	A09150 Organismal Systems	B 09151 Immune system	C 04613 Neutrophil extracellular trap formation [PATH:ko04613]	-4.33163	3.70445e-17
Sobic.007G187700	K04681	RBL1; retinoblastoma-like protein 1	A09130 Environmental Information Processing	B 09132 Signal transduction	C 04350 TGF-beta signaling pathway [PATH:ko04350]	-2.89882	3.9689e-07
Sobic.007G156500	K01176	AMY, amyA, malS; alpha-amylase [EC:3.2.1.1]	A09100 Metabolism	B 09101 Carbohydrate metabolism	C 00500 Starch and sucrose metabolism [PATH:ko00500]	-9.5008	2.19437e-12
Sobic.007G132600	K09422	MYBP; transcription factor MYB, plant	A09180 Brite Hierarchies	B 09182 Protein families: genetic information processing	C 03000 Transcription factors [BR:ko03000]	-4.64961	5.31426e-10
Sobic.007G165800	K19747	DCR; BAHD acyltransferase [EC:2.3.1.-]	A09180 Brite Hierarchies	B 09191 Unclassified: metabolism	C 99980 Enzymes with EC numbers	-3.89528	2.82579e-15
Sobic.007G221800	K11252	H2B; histone H2B	A09150 Organismal Systems	B 09151 Immune system	C 04613 Neutrophil extracellular trap formation [PATH:ko04613]	-3.31463	2.60198e-11
Sobic.007G168900	K10398	KIF11, EG5; kinesin family member 11	A09180 Brite Hierarchies	B 09182 Protein families: genetic information processing	C 03036 Chromosome and associated proteins [BR:ko03036]	-11.4592	8.74813e-24
Sobic.007G173300	K18195	RGL4, rhiE; rhamnogalacturonan endolyase [EC:4.2.2.23]	A09180 Brite Hierarchies	B 09191 Unclassified: metabolism	C 99980 Enzymes with EC numbers	-2.22942	1.63602e-05
Sobic.007G153600	K17279	REEP5_6; receptor expression-enhancing protein 5/6	A09180 Brite Hierarchies	B 09183 Protein families: signaling and cellular processes	C 04147 Exosome [BR:ko04147]	-2.88852	5.30213e-05
Sobic.007G126100	K16055	TPS; trehalose 6-phosphate synthase/phosphatase [EC:2.4.1.15 3.1.3.12]	A09100 Metabolism	B 09101 Carbohydrate metabolism	C 00500 Starch and sucrose metabolism [PATH:ko00500]	-2.96616	7.33386e-10
Sobic.007G008300	K10751	CHAF1B; chromatin assembly factor 1 subunit B	A09180 Brite Hierarchies	B 09182 Protein families: genetic information processing	C 03036 Chromosome and associated proteins [BR:ko03036]	-9.65085	3.71231e-13
Sobic.007G078200	K01853	CAS1; cycloartenol synthase [EC:5.4.99.8]	A09100 Metabolism	B 09103 Lipid metabolism	C 00100 Steroid biosynthesis [PATH:ko00100]	-2.09946	0.000321243
Sobic.007G047400	K12133	LHY; MYB-related transcription factor LHY	A09150 Organismal Systems	B 09159 Environmental adaptation	0	-3.53838	1.3841e-12
Sobic.007G213100	K14445	SLC13A2_3_5; solute carrier family 13 (sodium-dependent dicarboxylate transporter), member 2/3/5	A09180 Brite Hierarchies	B 09183 Protein families: signaling and cellular processes	C 02000 Transporters [BR:ko02000]	-2.53387	1.37309e-07
Sobic.007G152900	K02325	POLE2; DNA polymerase epsilon subunit 2 [EC:2.7.7.7]	A09120 Genetic Information Processing	B 09124 Replication and repair	C 03030 DNA replication [PATH:ko03030]	-8.23352	5.32305e-07
Sobic.007G014700	K00847	E2.7.1.4, scrK; fructokinase [EC:2.7.1.4]	A09100 Metabolism	B 09101 Carbohydrate metabolism	C 00051 Fructose and mannose metabolism [PATH:ko00051]	-2.99197	3.28006e-10
Sobic.007G144300	K16055	TPS; trehalose 6-phosphate synthase/phosphatase [EC:2.4.1.15 3.1.3.12]	A09100 Metabolism	B 09101 Carbohydrate metabolism	C 00500 Starch and sucrose metabolism [PATH:ko00500]	-2.68829	0.00419055
Sobic.007G196800	K08679	GAE, cap1J; UDP-glucuronate 4-epimerase [EC:5.1.3.6]	A09100 Metabolism	B 09101 Carbohydrate metabolism	C 00053 Ascorbate and aldarate metabolism [PATH:ko00053]	-2.5697	5.11321e-07
Sobic.007G000500	K25507	#N/A	#N/A	#N/A	#N/A	-4.45404	1.15897e-15
Sobic.007G160300	K18810	CYCD1_2_4; cyclin D1/2/4, plant	A09180 Brite Hierarchies	B 09193 Unclassified: signaling and cellular processes	C 99995 Signaling proteins	-7.90219	7.59244e-06
Sobic.007G015700	K13457	RPM1, RPS3; disease resistance protein RPM1	A09150 Organismal Systems	B 09159 Environmental adaptation	0	-3.2159	1.93496e-06
Sobic.007G190700	K18696	GDE1; glycerophosphodiester phosphodiesterase [EC:3.1.4.46]	A09100 Metabolism	B 09103 Lipid metabolism	C 00564 Glycerophospholipid metabolism [PATH:ko00564]	-2.06301	0.000567195
Sobic.007G068300	K00422	E1.10.3.1; polyphenol oxidase [EC:1.10.3.1]	A09100 Metabolism	B 09105 Amino acid metabolism	C 00350 Tyrosine metabolism [PATH:ko00350]	-12.1996	1.24932e-28
Sobic.007G181600	K00008	SORD, gutB; L-iditol 2-dehydrogenase [EC:1.1.1.14]	A09100 Metabolism	B 09101 Carbohydrate metabolism	C 00040 Pentose and glucuronate interconversions [PATH:ko00040]	-2.12623	7.42234e-06
Sobic.007G043700	K20456	OSBP; oxysterol-binding protein 1	A09180 Brite Hierarchies	B 09182 Protein families: genetic information processing	C 04131 Membrane trafficking [BR:ko04131]	-2.20574	7.95122e-06
Sobic.007G041200	K24184	CYP89A; cytochrome P450 family 89 subfamily A [EC:1.14.-.-]	A09180 Brite Hierarchies	B 09181 Protein families: metabolism	C 00199 Cytochrome P450 [BR:ko00199]	-7.39777	0.000223575
Sobic.007G092300	K09422	MYBP; transcription factor MYB, plant	A09180 Brite Hierarchies	B 09182 Protein families: genetic information processing	C 03000 Transcription factors [BR:ko03000]	-4.12919	1.20493e-10
Sobic.007G106500	K01595	ppc; phosphoenolpyruvate carboxylase [EC:4.1.1.31]	A09100 Metabolism	B 09101 Carbohydrate metabolism	C 00620 Pyruvate metabolism [PATH:ko00620]	-2.95479	2.1206e-09
Sobic.007G196000	K11844	USP16_45; ubiquitin carboxyl-terminal hydrolase 16/45 [EC:3.4.19.12]	A09180 Brite Hierarchies	B 09181 Protein families: metabolism	C 01002 Peptidases and inhibitors [BR:ko01002]	-6.47945	0.0107979
Sobic.007G224800	K09422	MYBP; transcription factor MYB, plant	A09180 Brite Hierarchies	B 09182 Protein families: genetic information processing	C 03000 Transcription factors [BR:ko03000]	-4.03811	3.16286e-10
Sobic.007G221000	K16285	XERICO; RING/U-box domain-containing protein [EC:2.3.2.27]	A09180 Brite Hierarchies	B 09182 Protein families: genetic information processing	C 04121 Ubiquitin system [BR:ko04121]	-2.13061	1.65579e-05
Sobic.007G136500	K09422	MYBP; transcription factor MYB, plant	A09180 Brite Hierarchies	B 09182 Protein families: genetic information processing	C 03000 Transcription factors [BR:ko03000]	-6.70974	9.91036e-22
Sobic.007G170100	K13356	FAR; alcohol-forming fatty acyl-CoA reductase [EC:1.2.1.84]	A09100 Metabolism	B 09103 Lipid metabolism	C 00073 Cutin, suberine and wax biosynthesis [PATH:ko00073]	-2.44087	7.10375e-07
Sobic.007G088800	K10523	SPOP; speckle-type POZ protein	A09130 Environmental Information Processing	B 09132 Signal transduction	C 04340 Hedgehog signaling pathway [PATH:ko04340]	-6.16156	0.0277297
Sobic.007G130000	K20606	ANP1; mitogen-activated protein kinase kinase kinase ANP1 [EC:2.7.11.25]	A09130 Environmental Information Processing	B 09132 Signal transduction	C 04016 MAPK signaling pathway - plant [PATH:ko04016]	-8.27521	3.91468e-07
Sobic.007G015100	K24184	CYP89A; cytochrome P450 family 89 subfamily A [EC:1.14.-.-]	A09180 Brite Hierarchies	B 09181 Protein families: metabolism	C 00199 Cytochrome P450 [BR:ko00199]	-3.29085	8.4153e-11
Sobic.007G068500	K00422	E1.10.3.1; polyphenol oxidase [EC:1.10.3.1]	A09100 Metabolism	B 09105 Amino acid metabolism	C 00350 Tyrosine metabolism [PATH:ko00350]	-7.72152	2.22343e-28
Sobic.001G379400	K00430	E1.11.1.7; peroxidase [EC:1.11.1.7]	A09100 Metabolism	B 09110 Biosynthesis of other secondary metabolites	C 00940 Phenylpropanoid biosynthesis [PATH:ko00940]	-9.74286	1.15436e-13
Sobic.001G189300	K01904	4CL; 4-coumarate--CoA ligase [EC:6.2.1.12]	A09100 Metabolism	B 09108 Metabolism of cofactors and vitamins	C 00130 Ubiquinone and other terpenoid-quinone biosynthesis [PATH:ko00130]	-4.28609	4.59248e-09
Sobic.001G317800	K00799	GST, gst; glutathione S-transferase [EC:2.5.1.18]	A09100 Metabolism	B 09106 Metabolism of other amino acids	C 00480 Glutathione metabolism [PATH:ko00480]	-3.55621	5.02949e-06
Sobic.001G346500	K07300	chaA, CAX; Ca2+:H+ antiporter	A09180 Brite Hierarchies	B 09183 Protein families: signaling and cellular processes	C 02000 Transporters [BR:ko02000]	-7.79164	1.54529e-05
Sobic.001G518800	K23618	AAE11_12; acyl-activating enzyme 11/12 [EC:6.2.1.2 6.2.1.-]	A09180 Brite Hierarchies	B 09181 Protein families: metabolism	C 01004 Lipid biosynthesis proteins [BR:ko01004]	-2.15294	9.68033e-06
Sobic.001G319200	K00799	GST, gst; glutathione S-transferase [EC:2.5.1.18]	A09100 Metabolism	B 09106 Metabolism of other amino acids	C 00480 Glutathione metabolism [PATH:ko00480]	-6.61548	0.00679855
Sobic.001G273200	K19861	BEBT, AMAT; benzyl alcohol O-benzoyltransferase [EC:2.3.1.196 2.3.1.232]	A09180 Brite Hierarchies	B 09191 Unclassified: metabolism	C 99980 Enzymes with EC numbers	-2.69629	0.000247048
Sobic.001G025500	K08057	CALR; calreticulin	A09120 Genetic Information Processing	B 09123 Folding, sorting and degradation	C 04141 Protein processing in endoplasmic reticulum [PATH:ko04141]	-2.81768	1.08225e-08
Sobic.001G239500	K00703	glgA; starch synthase [EC:2.4.1.21]	A09100 Metabolism	B 09101 Carbohydrate metabolism	C 00500 Starch and sucrose metabolism [PATH:ko00500]	-3.83465	6.66535e-09
Sobic.001G068301	K16189	PIF4; phytochrome-interacting factor 4	A09130 Environmental Information Processing	B 09132 Signal transduction	C 04075 Plant hormone signal transduction [PATH:ko04075]	-2.71628	1.1608e-08
Sobic.001G406800	K01953	asnB, ASNS; asparagine synthase (glutamine-hydrolysing) [EC:6.3.5.4]	A09100 Metabolism	B 09105 Amino acid metabolism	C 00250 Alanine, aspartate and glutamate metabolism [PATH:ko00250]	-14.2892	4.12075e-43
Sobic.001G353000	K16297	SCPL-II; serine carboxypeptidase-like clade II [EC:3.4.16.-]	A09180 Brite Hierarchies	B 09181 Protein families: metabolism	C 01002 Peptidases and inhibitors [BR:ko01002]	-2.04234	0.000158173
Sobic.001G196300	K09755	CYP84A, F5H; ferulate-5-hydroxylase [EC:1.14.-.-]	A09100 Metabolism	B 09110 Biosynthesis of other secondary metabolites	C 00940 Phenylpropanoid biosynthesis [PATH:ko00940]	-2.63933	1.07666e-07
Sobic.001G377700	K10895	FANCI; fanconi anemia group I protein	A09120 Genetic Information Processing	B 09124 Replication and repair	C 03460 Fanconi anemia pathway [PATH:ko03460]	-7.32024	0.000332542
Sobic.001G253900	K09338	HD-ZIP; homeobox-leucine zipper protein	A09180 Brite Hierarchies	B 09182 Protein families: genetic information processing	C 03000 Transcription factors [BR:ko03000]	-3.0621	1.99593e-09
Sobic.001G397800	K10728	TOPBP1; topoisomerase (DNA) II binding protein 1	A09120 Genetic Information Processing	B 09124 Replication and repair	C 03440 Homologous recombination [PATH:ko03440]	-2.19249	4.88253e-05
Sobic.001G154700	K04506	SIAH1; E3 ubiquitin-protein ligase SIAH1 [EC:2.3.2.27]	A09120 Genetic Information Processing	B 09123 Folding, sorting and degradation	C 04120 Ubiquitin mediated proteolysis [PATH:ko04120]	-2.17051	0.00649733
Sobic.001G388000	K15044	AGFG1; Arf-GAP domain and FG repeats-containing protein 1	A09180 Brite Hierarchies	B 09182 Protein families: genetic information processing	C 03019 Messenger RNA biogenesis [BR:ko03019]	-3.37748	1.32621e-11
Sobic.001G322400	K05765	CFL; cofilin	A09140 Cellular Processes	B 09142 Cell motility	C 04810 Regulation of actin cytoskeleton [PATH:ko04810]	-2.43974	0.0076791
Sobic.001G205000	K10436	MAPRE; microtubule-associated protein, RP/EB family	A09180 Brite Hierarchies	B 09182 Protein families: genetic information processing	C 03036 Chromosome and associated proteins [BR:ko03036]	-3.0788	1.32919e-07
Sobic.001G458400	K01188	E3.2.1.21; beta-glucosidase [EC:3.2.1.21]	A09100 Metabolism	B 09101 Carbohydrate metabolism	C 00500 Starch and sucrose metabolism [PATH:ko00500]	-2.03308	0.000664147
Sobic.001G496200	K09419	HSFF; heat shock transcription factor, other eukaryote	A09180 Brite Hierarchies	B 09182 Protein families: genetic information processing	C 03000 Transcription factors [BR:ko03000]	-3.82893	4.44989e-08
Sobic.001G275200	K22374	DMAS1; 3''-deamino-3''-oxonicotianamine reductase [EC:1.1.1.285]	A09100 Metabolism	B 09110 Biosynthesis of other secondary metabolites	C 00997 Biosynthesis of various secondary metabolites - part 3 [PATH:ko00997]	-2.07536	2.4938e-05
Sobic.001G062600	K09842	AAO3; abscisic-aldehyde oxidase [EC:1.2.3.14]	A09100 Metabolism	B 09109 Metabolism of terpenoids and polyketides	C 00906 Carotenoid biosynthesis [PATH:ko00906]	-2.04489	0.0085587
Sobic.001G310300	K00799	GST, gst; glutathione S-transferase [EC:2.5.1.18]	A09100 Metabolism	B 09106 Metabolism of other amino acids	C 00480 Glutathione metabolism [PATH:ko00480]	-3.94253	1.98889e-14
Sobic.001G028200	K12854	SNRNP200, BRR2; pre-mRNA-splicing helicase BRR2 [EC:3.6.4.13]	A09120 Genetic Information Processing	B 09121 Transcription	C 03040 Spliceosome [PATH:ko03040]	-5.80172	1.19644e-14
Sobic.001G065800	K00799	GST, gst; glutathione S-transferase [EC:2.5.1.18]	A09100 Metabolism	B 09106 Metabolism of other amino acids	C 00480 Glutathione metabolism [PATH:ko00480]	-2.20788	3.59503e-06
Sobic.001G197400	K10355	ACTF; actin, other eukaryote	A09180 Brite Hierarchies	B 09183 Protein families: signaling and cellular processes	C 04812 Cytoskeleton proteins [BR:ko04812]	-3.71666	2.88087e-13
Sobic.001G358900	K09422	MYBP; transcription factor MYB, plant	A09180 Brite Hierarchies	B 09182 Protein families: genetic information processing	C 03000 Transcription factors [BR:ko03000]	-2.65329	3.16619e-07
Sobic.001G125000	K07025	K07025; putative hydrolase of the HAD superfamily	A09180 Brite Hierarchies	B 09194 Poorly characterized	C 99996 General function prediction only	-3.72884	1.51767e-13
Sobic.001G427400	K11269	CTF18, CHL12; chromosome transmission fidelity protein 18	A09180 Brite Hierarchies	B 09182 Protein families: genetic information processing	C 03036 Chromosome and associated proteins [BR:ko03036]	-5.32661	3.03973e-10
Sobic.001G540900	K07375	TUBB; tubulin beta	A09140 Cellular Processes	B 09141 Transport and catabolism	C 04145 Phagosome [PATH:ko04145]	-4.08287	2.02703e-15
Sobic.001G357900	K19892	GN4; glucan endo-1,3-beta-glucosidase 4 [EC:3.2.1.39]	A09100 Metabolism	B 09101 Carbohydrate metabolism	C 00500 Starch and sucrose metabolism [PATH:ko00500]	-2.87557	1.2469e-08
Sobic.001G115400	K20604	MKK9; mitogen-activated protein kinase kinase 9 [EC:2.7.12.2]	A09130 Environmental Information Processing	B 09132 Signal transduction	C 04016 MAPK signaling pathway - plant [PATH:ko04016]	-3.31371	0.000101038
Sobic.001G247700	K15397	KCS; 3-ketoacyl-CoA synthase [EC:2.3.1.199]	A09100 Metabolism	B 09103 Lipid metabolism	C 00062 Fatty acid elongation [PATH:ko00062]	-9.59884	1.08778e-36
Sobic.001G078300	K14307	NUPL1, NUP49; nucleoporin p58/p45	A09120 Genetic Information Processing	B 09122 Translation	C 03013 Nucleocytoplasmic transport [PATH:ko03013]	-2.17856	0.000423265
Sobic.001G295400	K02214	CDC7; cell division control protein 7 [EC:2.7.11.1]	A09140 Cellular Processes	B 09143 Cell growth and death	C 04110 Cell cycle [PATH:ko04110]	-8.6044	2.16553e-08
Sobic.001G273100	K03327	TC.MATE, SLC47A, norM, mdtK, dinF; multidrug resistance protein, MATE family	A09180 Brite Hierarchies	B 09183 Protein families: signaling and cellular processes	C 02000 Transporters [BR:ko02000]	-2.22812	5.65128e-06
Sobic.001G370000	K10251	HSD17B12, KAR, IFA38; 17beta-estradiol 17-dehydrogenase / very-long-chain 3-oxoacyl-CoA reductase [EC:1.1.1.62 1.1.1.330]	A09100 Metabolism	B 09103 Lipid metabolism	C 00062 Fatty acid elongation [PATH:ko00062]	-2.40705	2.23345e-06
Sobic.001G023600	K20362	YIF1; protein transport protein YIF1	A09180 Brite Hierarchies	B 09182 Protein families: genetic information processing	C 04131 Membrane trafficking [BR:ko04131]	-8.57132	2.83823e-08
Sobic.001G519400	K23558	3BETAHSDD; plant 3beta-hydroxysteroid-4alpha-carboxylate 3-dehydrogenase [EC:1.1.1.418]	A09100 Metabolism	B 09103 Lipid metabolism	C 00100 Steroid biosynthesis [PATH:ko00100]	-10.1978	4.01794e-16
Sobic.001G138200	K20893	PARVUS, GLZ1, GATL1; probable galacturonosyltransferase-like 1 [EC:2.4.1.-]	A09180 Brite Hierarchies	B 09181 Protein families: metabolism	C 01003 Glycosyltransferases [BR:ko01003]	-7.79164	1.54529e-05
Sobic.001G443800	K01580	E4.1.1.15, gadB, gadA, GAD; glutamate decarboxylase [EC:4.1.1.15]	A09100 Metabolism	B 09101 Carbohydrate metabolism	C 00650 Butanoate metabolism [PATH:ko00650]	-6.61548	0.00679855
Sobic.001G514400	K00799	GST, gst; glutathione S-transferase [EC:2.5.1.18]	A09100 Metabolism	B 09106 Metabolism of other amino acids	C 00480 Glutathione metabolism [PATH:ko00480]	-3.91297	1.98889e-14
Sobic.001G042901	K10760	IPT; adenylate dimethylallyltransferase (cytokinin synthase) [EC:2.5.1.27 2.5.1.112]	A09100 Metabolism	B 09109 Metabolism of terpenoids and polyketides	C 00908 Zeatin biosynthesis [PATH:ko00908]	-2.08505	0.0188587
Sobic.001G009700	K11251	H2A; histone H2A	A09140 Cellular Processes	B 09143 Cell growth and death	C 04217 Necroptosis [PATH:ko04217]	-5.83717	6.46404e-23
Sobic.001G180200	K13348	MPV17; protein Mpv17	A09140 Cellular Processes	B 09141 Transport and catabolism	C 04146 Peroxisome [PATH:ko04146]	-2.34849	6.59453e-07
Sobic.001G267100	K13946	AUX1, LAX; auxin influx carrier (AUX1 LAX family)	A09130 Environmental Information Processing	B 09132 Signal transduction	C 04075 Plant hormone signal transduction [PATH:ko04075]	-9.84327	3.78043e-14
Sobic.001G514700	K20619	CYP78A; cytochrome P450 family 78 subfamily A	A09180 Brite Hierarchies	B 09181 Protein families: metabolism	C 00199 Cytochrome P450 [BR:ko00199]	-6.85422	0.00276094
Sobic.001G441700	K08235	E2.4.1.207; xyloglucan:xyloglucosyl transferase [EC:2.4.1.207]	A09180 Brite Hierarchies	B 09191 Unclassified: metabolism	C 99980 Enzymes with EC numbers	-3.81324	1.93284e-13
Sobic.001G314000	K00430	E1.11.1.7; peroxidase [EC:1.11.1.7]	A09100 Metabolism	B 09110 Biosynthesis of other secondary metabolites	C 00940 Phenylpropanoid biosynthesis [PATH:ko00940]	-4.38631	4.39226e-16
Sobic.001G514200	K00799	GST, gst; glutathione S-transferase [EC:2.5.1.18]	A09100 Metabolism	B 09106 Metabolism of other amino acids	C 00480 Glutathione metabolism [PATH:ko00480]	-3.96509	1.76592e-15
Sobic.001G379900	K03549	kup; KUP system potassium uptake protein	A09180 Brite Hierarchies	B 09183 Protein families: signaling and cellular processes	C 02000 Transporters [BR:ko02000]	-2.5927	1.45805e-07
Sobic.001G213300	K15402	CYP86B1; fatty acid omega-hydroxylase [EC:1.14.-.-]	A09100 Metabolism	B 09103 Lipid metabolism	C 00073 Cutin, suberine and wax biosynthesis [PATH:ko00073]	-3.43746	2.79553e-12
Sobic.001G439700	K05765	CFL; cofilin	A09140 Cellular Processes	B 09142 Cell motility	C 04810 Regulation of actin cytoskeleton [PATH:ko04810]	-2.03994	2.24276e-05
Sobic.001G098900	K08486	STX1B_2_3; syntaxin 1B/2/3	A09120 Genetic Information Processing	B 09123 Folding, sorting and degradation	C 04130 SNARE interactions in vesicular transport [PATH:ko04130]	-3.07108	3.56645e-08
Sobic.001G444500	K00430	E1.11.1.7; peroxidase [EC:1.11.1.7]	A09100 Metabolism	B 09110 Biosynthesis of other secondary metabolites	C 00940 Phenylpropanoid biosynthesis [PATH:ko00940]	-3.98135	1.03873e-15
Sobic.001G480700	K01535	PMA1, PMA2; H+-transporting ATPase [EC:7.1.2.1]	A09100 Metabolism	B 09102 Energy metabolism	C 00190 Oxidative phosphorylation [PATH:ko00190]	-2.64878	0.0835712
Sobic.001G403100	K05909	E1.10.3.2; laccase [EC:1.10.3.2]	A09180 Brite Hierarchies	B 09191 Unclassified: metabolism	C 99980 Enzymes with EC numbers	-9.27288	2.80828e-11
Sobic.001G461800	K20027	ZDHHC1_11; palmitoyltransferase ZDHHC1/11 [EC:2.3.1.225]	A09180 Brite Hierarchies	B 09182 Protein families: genetic information processing	C 04131 Membrane trafficking [BR:ko04131]	-2.50356	3.12413e-07
Sobic.001G425600	K13993	HSP20; HSP20 family protein	A09120 Genetic Information Processing	B 09123 Folding, sorting and degradation	C 04141 Protein processing in endoplasmic reticulum [PATH:ko04141]	-8.72963	7.34981e-09
Sobic.001G459800	K00012	UGDH, ugd; UDPglucose 6-dehydrogenase [EC:1.1.1.22]	A09100 Metabolism	B 09101 Carbohydrate metabolism	C 00040 Pentose and glucuronate interconversions [PATH:ko00040]	-2.1551	5.65007e-06
Sobic.001G456500	K07466	RFA1, RPA1, rpa; replication factor A1	A09120 Genetic Information Processing	B 09124 Replication and repair	C 03030 DNA replication [PATH:ko03030]	-5.25534	4.49578e-17
Sobic.001G444400	K00430	E1.11.1.7; peroxidase [EC:1.11.1.7]	A09100 Metabolism	B 09110 Biosynthesis of other secondary metabolites	C 00940 Phenylpropanoid biosynthesis [PATH:ko00940]	-7.95444	5.36428e-06
Sobic.001G333400	K13449	PR1; pathogenesis-related protein 1	A09130 Environmental Information Processing	B 09132 Signal transduction	C 04016 MAPK signaling pathway - plant [PATH:ko04016]	-3.6942	3.8294e-11
Sobic.001G334501	K03921	FAB2, SSI2, desA1; acyl-[acyl-carrier-protein] desaturase [EC:1.14.19.2 1.14.19.11 1.14.19.26]	A09100 Metabolism	B 09103 Lipid metabolism	C 00061 Fatty acid biosynthesis [PATH:ko00061]	-12.8367	6.05524e-33
Sobic.001G399200	K10406	KIFC2_3; kinesin family member C2/C3	A09180 Brite Hierarchies	B 09183 Protein families: signaling and cellular processes	C 04812 Cytoskeleton proteins [BR:ko04812]	-2.33807	1.66396e-06
Sobic.001G276800	K14638	SLC15A3_4, PHT; solute carrier family 15 (peptide/histidine transporter), member 3/4	A09180 Brite Hierarchies	B 09183 Protein families: signaling and cellular processes	C 02000 Transporters [BR:ko02000]	-9.29331	2.29373e-11
Sobic.001G162900	K11968	ARIH1; ariadne-1 [EC:2.3.2.31]	A09180 Brite Hierarchies	B 09182 Protein families: genetic information processing	C 04121 Ubiquitin system [BR:ko04121]	-3.24803	4.37218e-06
Sobic.001G069700	K19706	FAH; dihydroceramide fatty acyl 2-hydroxylase [EC:1.14.18.7]	A09180 Brite Hierarchies	B 09191 Unclassified: metabolism	C 99980 Enzymes with EC numbers	-3.14292	1.30811e-10
Sobic.001G189000	K00430	E1.11.1.7; peroxidase [EC:1.11.1.7]	A09100 Metabolism	B 09110 Biosynthesis of other secondary metabolites	C 00940 Phenylpropanoid biosynthesis [PATH:ko00940]	-9.02667	3.81732e-10
Sobic.001G534000	K10406	KIFC2_3; kinesin family member C2/C3	A09180 Brite Hierarchies	B 09183 Protein families: signaling and cellular processes	C 04812 Cytoskeleton proteins [BR:ko04812]	-5.77691	5.53984e-16
Sobic.001G206200	K00218	por; protochlorophyllide reductase [EC:1.3.1.33]	A09100 Metabolism	B 09108 Metabolism of cofactors and vitamins	C 00860 Porphyrin and chlorophyll metabolism [PATH:ko00860]	-3.57135	1.53986e-13
Sobic.001G416800	K11251	H2A; histone H2A	A09140 Cellular Processes	B 09143 Cell growth and death	C 04217 Necroptosis [PATH:ko04217]	-5.60708	1.81408e-23
Sobic.001G271600	K19861	BEBT, AMAT; benzyl alcohol O-benzoyltransferase [EC:2.3.1.196 2.3.1.232]	A09180 Brite Hierarchies	B 09191 Unclassified: metabolism	C 99980 Enzymes with EC numbers	-11.7855	6.65262e-26
Sobic.001G109700	K19001	HELLS, DDM1; ATP-dependent DNA helicase	A09180 Brite Hierarchies	B 09182 Protein families: genetic information processing	C 03036 Chromosome and associated proteins [BR:ko03036]	-4.34292	1.4165e-10
Sobic.001G422100	K07025	K07025; putative hydrolase of the HAD superfamily	A09180 Brite Hierarchies	B 09194 Poorly characterized	C 99996 General function prediction only	-2.13418	7.59244e-06
Sobic.001G434100	K13459	RPS2; disease resistance protein RPS2	A09150 Organismal Systems	B 09159 Environmental adaptation	0	-3.02204	9.11731e-10
Sobic.001G067800	K07238	TC.ZIP, zupT, ZRT3, ZIP2; zinc transporter, ZIP family	A09180 Brite Hierarchies	B 09183 Protein families: signaling and cellular processes	C 02000 Transporters [BR:ko02000]	-2.59658	5.67073e-06
Sobic.001G379600	K07198	PRKAA, AMPK; 5'-AMP-activated protein kinase, catalytic alpha subunit [EC:2.7.11.11]	A09130 Environmental Information Processing	B 09132 Signal transduction	C 04371 Apelin signaling pathway [PATH:ko04371]	-3.61167	2.20876e-13
Sobic.001G344500	K00695	SUS; sucrose synthase [EC:2.4.1.13]	A09100 Metabolism	B 09101 Carbohydrate metabolism	C 00500 Starch and sucrose metabolism [PATH:ko00500]	-4.22091	1.39126e-17
Sobic.001G016201	K11548	NUF2, CDCA1; kinetochore protein Nuf2	A09180 Brite Hierarchies	B 09182 Protein families: genetic information processing	C 03036 Chromosome and associated proteins [BR:ko03036]	-6.56785	7.8405e-17
Sobic.001G177000	K08913	LHCB2; light-harvesting complex II chlorophyll a/b binding protein 2	A09100 Metabolism	B 09102 Energy metabolism	C 00196 Photosynthesis - antenna proteins [PATH:ko00196]	-4.56006	9.18014e-20
Sobic.001G086400	K09264	K09264; MADS-box transcription factor, plant	A09180 Brite Hierarchies	B 09182 Protein families: genetic information processing	C 03000 Transcription factors [BR:ko03000]	-3.4233	0.0468143
Sobic.001G112600	K10355	ACTF; actin, other eukaryote	A09180 Brite Hierarchies	B 09183 Protein families: signaling and cellular processes	C 04812 Cytoskeleton proteins [BR:ko04812]	-3.01495	3.04241e-10
Sobic.001G529400	K11254	H4; histone H4	A09150 Organismal Systems	B 09151 Immune system	C 04613 Neutrophil extracellular trap formation [PATH:ko04613]	-3.11613	1.83753e-10
Sobic.001G013400	K11548	NUF2, CDCA1; kinetochore protein Nuf2	A09180 Brite Hierarchies	B 09182 Protein families: genetic information processing	C 03036 Chromosome and associated proteins [BR:ko03036]	-9.80109	6.06122e-14
Sobic.001G408001	K05857	PLCD; phosphatidylinositol phospholipase C, delta [EC:3.1.4.11]	A09100 Metabolism	B 09101 Carbohydrate metabolism	C 00562 Inositol phosphate metabolism [PATH:ko00562]	-2.64853	0.000852359
Sobic.001G078600	K08850	AURKX; aurora kinase, other [EC:2.7.11.1]	A09180 Brite Hierarchies	B 09181 Protein families: metabolism	C 01001 Protein kinases [BR:ko01001]	-7.60811	4.6825e-05
Sobic.001G505100	K09873	TIP; aquaporin TIP	A09180 Brite Hierarchies	B 09183 Protein families: signaling and cellular processes	C 02000 Transporters [BR:ko02000]	-4.28792	5.52167e-18
Sobic.001G169800	K06627	CCNA; cyclin-A	A09130 Environmental Information Processing	B 09132 Signal transduction	C 04152 AMPK signaling pathway [PATH:ko04152]	-10.0733	2.02703e-15
Sobic.001G179400	K08235	E2.4.1.207; xyloglucan:xyloglucosyl transferase [EC:2.4.1.207]	A09180 Brite Hierarchies	B 09191 Unclassified: metabolism	C 99980 Enzymes with EC numbers	-10.2193	3.10151e-16
Sobic.001G495500	K15397	KCS; 3-ketoacyl-CoA synthase [EC:2.3.1.199]	A09100 Metabolism	B 09103 Lipid metabolism	C 00062 Fatty acid elongation [PATH:ko00062]	-9.12113	1.55054e-10
Sobic.001G113800	K00924	E2.7.1.-; kinase [EC:2.7.1.-]	A09180 Brite Hierarchies	B 09191 Unclassified: metabolism	C 99980 Enzymes with EC numbers	-3.72753	6.83828e-14
Sobic.001G475500	K07904	RAB11A; Ras-related protein Rab-11A	A09140 Cellular Processes	B 09141 Transport and catabolism	C 04144 Endocytosis [PATH:ko04144]	-2.11655	1.01027e-05
Sobic.001G362500	K03444	ERD6, ESL1; MFS transporter, SP family, ERD6-like sugar transporter	A09180 Brite Hierarchies	B 09183 Protein families: signaling and cellular processes	C 02000 Transporters [BR:ko02000]	-6.61548	0.00679855
Sobic.001G158300	K12191	CHMP2A; charged multivesicular body protein 2A	A09140 Cellular Processes	B 09141 Transport and catabolism	C 04144 Endocytosis [PATH:ko04144]	-3.66491	4.02421e-08
Sobic.001G088400	K10400	KIF15; kinesin family member 15	A09180 Brite Hierarchies	B 09183 Protein families: signaling and cellular processes	C 04812 Cytoskeleton proteins [BR:ko04812]	-3.85069	9.87616e-11
Sobic.001G080200	K00430	E1.11.1.7; peroxidase [EC:1.11.1.7]	A09100 Metabolism	B 09110 Biosynthesis of other secondary metabolites	C 00940 Phenylpropanoid biosynthesis [PATH:ko00940]	-4.39747	3.80018e-16
Sobic.001G221900	K15397	KCS; 3-ketoacyl-CoA synthase [EC:2.3.1.199]	A09100 Metabolism	B 09103 Lipid metabolism	C 00062 Fatty acid elongation [PATH:ko00062]	-4.69029	1.91087e-19
Sobic.001G452900	K19891	GN1_2_3; glucan endo-1,3-beta-glucosidase 1/2/3 [EC:3.2.1.39]	A09100 Metabolism	B 09101 Carbohydrate metabolism	C 00500 Starch and sucrose metabolism [PATH:ko00500]	-3.07831	2.4786e-08
Sobic.001G533400	K24175	MFSD5; MFS transporter, MFS domain-containing protein family, molybdate-anion transporter	A09180 Brite Hierarchies	B 09183 Protein families: signaling and cellular processes	C 02000 Transporters [BR:ko02000]	-2.07843	1.34934e-05
Sobic.001G074100	K10401	KIF18_19; kinesin family member 18/19	A09180 Brite Hierarchies	B 09183 Protein families: signaling and cellular processes	C 04812 Cytoskeleton proteins [BR:ko04812]	-2.53604	2.2947e-07
Sobic.001G277000	K00430	E1.11.1.7; peroxidase [EC:1.11.1.7]	A09100 Metabolism	B 09110 Biosynthesis of other secondary metabolites	C 00940 Phenylpropanoid biosynthesis [PATH:ko00940]	-2.73144	1.51635e-08
Sobic.001G488900	K09338	HD-ZIP; homeobox-leucine zipper protein	A09180 Brite Hierarchies	B 09182 Protein families: genetic information processing	C 03000 Transcription factors [BR:ko03000]	-6.30229	4.21192e-22
Sobic.001G092600	K24205	TMBIM, LFG; protein lifeguard	A09180 Brite Hierarchies	B 09193 Unclassified: signaling and cellular processes	C 99995 Signaling proteins	-2.36784	0.00225825
Sobic.001G416900	K11251	H2A; histone H2A	A09140 Cellular Processes	B 09143 Cell growth and death	C 04217 Necroptosis [PATH:ko04217]	-3.69216	9.47049e-13
Sobic.001G338000	K00059	fabG, OAR1; 3-oxoacyl-[acyl-carrier protein] reductase [EC:1.1.1.100]	A09100 Metabolism	B 09103 Lipid metabolism	C 00061 Fatty acid biosynthesis [PATH:ko00061]	-2.23269	2.06758e-05
Sobic.001G418100	K08678	UXS1, uxs; UDP-glucuronate decarboxylase [EC:4.1.1.35]	A09100 Metabolism	B 09101 Carbohydrate metabolism	C 00520 Amino sugar and nucleotide sugar metabolism [PATH:ko00520]	-2.53672	8.15361e-08
Sobic.001G444000	K14638	SLC15A3_4, PHT; solute carrier family 15 (peptide/histidine transporter), member 3/4	A09180 Brite Hierarchies	B 09183 Protein families: signaling and cellular processes	C 02000 Transporters [BR:ko02000]	-7.05901	0.00115619
Sobic.001G514300	K00799	GST, gst; glutathione S-transferase [EC:2.5.1.18]	A09100 Metabolism	B 09106 Metabolism of other amino acids	C 00480 Glutathione metabolism [PATH:ko00480]	-12.1131	4.67694e-28
Sobic.001G194900	K00311	ETFDH; electron-transferring-flavoprotein dehydrogenase [EC:1.5.5.1]	A09180 Brite Hierarchies	B 09191 Unclassified: metabolism	C 99980 Enzymes with EC numbers	-2.43334	3.57587e-07
Sobic.001G435700	K17338	REEP1_2_3_4; receptor expression-enhancing protein 1/2/3/4	A09180 Brite Hierarchies	B 09193 Unclassified: signaling and cellular processes	C 99992 Structural proteins	-4.06638	1.77873e-15
Sobic.001G439000	K13946	AUX1, LAX; auxin influx carrier (AUX1 LAX family)	A09130 Environmental Information Processing	B 09132 Signal transduction	C 04075 Plant hormone signal transduction [PATH:ko04075]	-10.6579	7.92453e-19
Sobic.001G130600	K20843	GALT2S; hydroxyproline O-galactosyltransferase 2/3/4/5/6 [EC:2.4.1.-]	A09180 Brite Hierarchies	B 09181 Protein families: metabolism	C 01003 Glycosyltransferases [BR:ko01003]	-8.39348	1.57245e-07
Sobic.001G126400	K13179	DDX18, HAS1; ATP-dependent RNA helicase DDX18/HAS1 [EC:3.6.4.13]	A09180 Brite Hierarchies	B 09182 Protein families: genetic information processing	C 03041 Spliceosome [BR:ko03041]	-2.73708	1.08117e-06
Sobic.001G177900	K10400	KIF15; kinesin family member 15	A09180 Brite Hierarchies	B 09183 Protein families: signaling and cellular processes	C 04812 Cytoskeleton proteins [BR:ko04812]	-3.75278	6.82195e-12
Sobic.001G423100	K09562	HSPBP1, FES1; hsp70-interacting protein	A09120 Genetic Information Processing	B 09123 Folding, sorting and degradation	C 04141 Protein processing in endoplasmic reticulum [PATH:ko04141]	-2.52402	1.68351e-07
Sobic.001G468300	K01246	tag; DNA-3-methyladenine glycosylase I [EC:3.2.2.20]	A09120 Genetic Information Processing	B 09124 Replication and repair	C 03410 Base excision repair [PATH:ko03410]	-3.08354	0.000181714
Sobic.001G175000	K15601	KDM3; [histone H3]-dimethyl-L-lysine9 demethylase [EC:1.14.11.65]	A09150 Organismal Systems	B 09159 Environmental adaptation	0	-2.63465	2.74247e-05
Sobic.001G275800	K14638	SLC15A3_4, PHT; solute carrier family 15 (peptide/histidine transporter), member 3/4	A09180 Brite Hierarchies	B 09183 Protein families: signaling and cellular processes	C 02000 Transporters [BR:ko02000]	-3.28929	4.22641e-11
Sobic.001G214000	K11592	DICER1, DCR1; endoribonuclease Dicer [EC:3.1.26.-]	A09160 Human Diseases	B 09161 Cancer: overview	0	-3.42011	5.0915e-07
Sobic.006G211400	K04121	E4.2.3.19; ent-kaurene synthase [EC:4.2.3.19]	A09100 Metabolism	B 09109 Metabolism of terpenoids and polyketides	C 00904 Diterpenoid biosynthesis [PATH:ko00904]	-6.32924	0.0172452
Sobic.006G259100	K12483	EHD1; EH domain-containing protein 1	A09140 Cellular Processes	B 09141 Transport and catabolism	C 04144 Endocytosis [PATH:ko04144]	-7.54134	6.84272e-05
Sobic.006G073500	K14332	psaO; photosystem I subunit PsaO	A09100 Metabolism	B 09102 Energy metabolism	C 00195 Photosynthesis [PATH:ko00195]	-3.26319	9.58779e-12
Sobic.006G191800	K11254	H4; histone H4	A09150 Organismal Systems	B 09151 Immune system	C 04613 Neutrophil extracellular trap formation [PATH:ko04613]	-3.27606	2.10682e-10
Sobic.006G119300	K10744	RNASEH2B; ribonuclease H2 subunit B	A09120 Genetic Information Processing	B 09124 Replication and repair	C 03030 DNA replication [PATH:ko03030]	-8.81689	3.40895e-09
Sobic.006G135800	K00430	E1.11.1.7; peroxidase [EC:1.11.1.7]	A09100 Metabolism	B 09110 Biosynthesis of other secondary metabolites	C 00940 Phenylpropanoid biosynthesis [PATH:ko00940]	-3.17266	7.66619e-08
Sobic.006G169200	K09338	HD-ZIP; homeobox-leucine zipper protein	A09180 Brite Hierarchies	B 09182 Protein families: genetic information processing	C 03000 Transcription factors [BR:ko03000]	-5.81612	2.44182e-08
Sobic.006G173000	K13783	SLC37A1_2; MFS transporter, OPA family, solute carrier family 37 (glycerol-3-phosphate transporter), member 1/2	A09180 Brite Hierarchies	B 09183 Protein families: signaling and cellular processes	C 02000 Transporters [BR:ko02000]	-2.09483	2.5743e-05
Sobic.006G144500	K15404	K15404, CER1; aldehyde decarbonylase [EC:4.1.99.5]	A09100 Metabolism	B 09103 Lipid metabolism	C 00073 Cutin, suberine and wax biosynthesis [PATH:ko00073]	-2.0886	0.000168069
Sobic.006G081800	K11253	H3; histone H3	A09150 Organismal Systems	B 09151 Immune system	C 04613 Neutrophil extracellular trap formation [PATH:ko04613]	-4.04942	1.8251e-13
Sobic.006G132500	K01183	E3.2.1.14; chitinase [EC:3.2.1.14]	A09100 Metabolism	B 09101 Carbohydrate metabolism	C 00520 Amino sugar and nucleotide sugar metabolism [PATH:ko00520]	-6.85422	0.00276094
Sobic.006G035600	K10400	KIF15; kinesin family member 15	A09180 Brite Hierarchies	B 09183 Protein families: signaling and cellular processes	C 04812 Cytoskeleton proteins [BR:ko04812]	-10.5768	2.37842e-18
Sobic.006G069000	K02639	petF; ferredoxin	A09100 Metabolism	B 09102 Energy metabolism	C 00195 Photosynthesis [PATH:ko00195]	-8.1678	1.47355e-29
Sobic.006G153500	K16297	SCPL-II; serine carboxypeptidase-like clade II [EC:3.4.16.-]	A09180 Brite Hierarchies	B 09181 Protein families: metabolism	C 01002 Peptidases and inhibitors [BR:ko01002]	-4.9798	5.5638e-15
Sobic.006G044200	K01183	E3.2.1.14; chitinase [EC:3.2.1.14]	A09100 Metabolism	B 09101 Carbohydrate metabolism	C 00520 Amino sugar and nucleotide sugar metabolism [PATH:ko00520]	-3.20202	9.09406e-09
Sobic.006G182800	K09419	HSFF; heat shock transcription factor, other eukaryote	A09180 Brite Hierarchies	B 09182 Protein families: genetic information processing	C 03000 Transcription factors [BR:ko03000]	-7.32024	0.000332542
Sobic.006G066400	K21995	CYP77A; cytochrome P450 family 77 subfamily A [EC:1.14.-.-]	A09100 Metabolism	B 09103 Lipid metabolism	C 00073 Cutin, suberine and wax biosynthesis [PATH:ko00073]	-3.49894	1.82865e-12
Sobic.006G105000	K01785	galM, GALM; aldose 1-epimerase [EC:5.1.3.3]	A09100 Metabolism	B 09101 Carbohydrate metabolism	C 00010 Glycolysis / Gluconeogenesis [PATH:ko00010]	-2.42394	1.82299e-06
Sobic.006G126700	K02537	MAD2; mitotic spindle assembly checkpoint protein MAD2	A09140 Cellular Processes	B 09143 Cell growth and death	C 04110 Cell cycle [PATH:ko04110]	-3.40645	1.72485e-08
Sobic.006G179200	K21777	CCNB; G2/mitotic-specific cyclin-B, other	A09180 Brite Hierarchies	B 09182 Protein families: genetic information processing	C 03032 DNA replication proteins [BR:ko03032]	-9.65085	3.71231e-13
Sobic.006G158700	K15095	E1.1.1.208; (+)-neomenthol dehydrogenase [EC:1.1.1.208]	A09100 Metabolism	B 09109 Metabolism of terpenoids and polyketides	C 00902 Monoterpenoid biosynthesis [PATH:ko00902]	-2.20308	3.46376e-06
Sobic.006G233600	K20729	EPF1_2; protein EPIDERMAL PATTERNING FACTOR 1/2	A09130 Environmental Information Processing	B 09132 Signal transduction	C 04016 MAPK signaling pathway - plant [PATH:ko04016]	-7.60811	4.6825e-05
Sobic.006G208100	K24976	TRK, HKT; Trk/Ktr/HKT type cation transporter	A09180 Brite Hierarchies	B 09183 Protein families: signaling and cellular processes	C 02000 Transporters [BR:ko02000]	-8.10811	6.48277e-22
Sobic.006G227600	K08695	ANR; anthocyanidin reductase [EC:1.3.1.77]	A09100 Metabolism	B 09110 Biosynthesis of other secondary metabolites	C 00941 Flavonoid biosynthesis [PATH:ko00941]	-8.66837	1.24037e-08
Sobic.006G149300	K22522	LOG; cytokinin riboside 5'-monophosphate phosphoribohydrolase [EC:3.2.2.-]	A09180 Brite Hierarchies	B 09191 Unclassified: metabolism	C 99980 Enzymes with EC numbers	-9.12113	1.55054e-10
Sobic.006G112800	K10406	KIFC2_3; kinesin family member C2/C3	A09180 Brite Hierarchies	B 09183 Protein families: signaling and cellular processes	C 04812 Cytoskeleton proteins [BR:ko04812]	-6.21078	1.27181e-18
Sobic.006G068100	K22390	ACP7; acid phosphatase type 7	A09180 Brite Hierarchies	B 09191 Unclassified: metabolism	C 99999 Others	-3.349	3.42561e-07
Sobic.006G090100	K09919	K09919; uncharacterized protein	A09180 Brite Hierarchies	B 09194 Poorly characterized	C 99997 Function unknown	-2.20412	4.65664e-06
Sobic.006G046500	K00809	DHPS, dys; deoxyhypusine synthase [EC:2.5.1.46]	A09180 Brite Hierarchies	B 09191 Unclassified: metabolism	C 99980 Enzymes with EC numbers	-5.82881	2.14495e-23
Sobic.006G170800	K00025	MDH1; malate dehydrogenase [EC:1.1.1.37]	A09100 Metabolism	B 09101 Carbohydrate metabolism	C 00020 Citrate cycle (TCA cycle) [PATH:ko00020]	-2.46792	1.16349e-06
Sobic.006G195500	K10742	DNA2; DNA replication ATP-dependent helicase Dna2 [EC:3.6.4.12]	A09120 Genetic Information Processing	B 09124 Replication and repair	C 03030 DNA replication [PATH:ko03030]	-7.73302	2.22632e-05
Sobic.006G159600	K08360	CYB561; transmembrane ascorbate-dependent reductase [EC:7.2.1.3]	A09180 Brite Hierarchies	B 09183 Protein families: signaling and cellular processes	C 02000 Transporters [BR:ko02000]	-2.33504	4.43136e-05
Sobic.006G264201	K08917	LHCB6; light-harvesting complex II chlorophyll a/b binding protein 6	A09100 Metabolism	B 09102 Energy metabolism	C 00196 Photosynthesis - antenna proteins [PATH:ko00196]	-3.65536	4.77555e-14
Sobic.006G012200	K11816	YUCCA; indole-3-pyruvate monooxygenase [EC:1.14.13.168]	A09100 Metabolism	B 09105 Amino acid metabolism	C 00380 Tryptophan metabolism [PATH:ko00380]	-7.73302	2.22632e-05
Sobic.006G136000	K11268	ESCO, ECO1; N-acetyltransferase [EC:2.3.1.-]	A09180 Brite Hierarchies	B 09182 Protein families: genetic information processing	C 03036 Chromosome and associated proteins [BR:ko03036]	-6.85422	0.00276094
Sobic.006G101900	K24193	STP; MFS transporter, SP family, sugar:H+ symporter	A09180 Brite Hierarchies	B 09183 Protein families: signaling and cellular processes	C 02000 Transporters [BR:ko02000]	-2.08507	4.94487e-05
Sobic.006G277600	K00430	E1.11.1.7; peroxidase [EC:1.11.1.7]	A09100 Metabolism	B 09110 Biosynthesis of other secondary metabolites	C 00940 Phenylpropanoid biosynthesis [PATH:ko00940]	-3.97282	2.29593e-11
Sobic.006G069500	K17479	GRXCR1; glutaredoxin domain-containing cysteine-rich protein 1	A09180 Brite Hierarchies	B 09181 Protein families: metabolism	C 01009 Protein phosphatases and associated proteins [BR:ko01009]	-9.12113	1.55054e-10
Sobic.006G127100	K01638	aceB, glcB; malate synthase [EC:2.3.3.9]	A09100 Metabolism	B 09101 Carbohydrate metabolism	C 00620 Pyruvate metabolism [PATH:ko00620]	-2.09076	4.76808e-05
Sobic.006G163900	K09338	HD-ZIP; homeobox-leucine zipper protein	A09180 Brite Hierarchies	B 09182 Protein families: genetic information processing	C 03000 Transcription factors [BR:ko03000]	-2.96729	9.31335e-09
Sobic.006G177000	K15398	CYP86A4S; fatty acid omega-hydroxylase [EC:1.14.-.-]	A09100 Metabolism	B 09103 Lipid metabolism	C 00073 Cutin, suberine and wax biosynthesis [PATH:ko00073]	-5.33997	1.40397e-23
Sobic.006G154000	K16221	TCP21, CHE; transcription factor TCP21 (protein CCA1 HIKING EXPEDITION)	A09150 Organismal Systems	B 09159 Environmental adaptation	0	-4.81275	1.47903e-09
Sobic.006G228100	K08235	E2.4.1.207; xyloglucan:xyloglucosyl transferase [EC:2.4.1.207]	A09180 Brite Hierarchies	B 09191 Unclassified: metabolism	C 99980 Enzymes with EC numbers	-6.09442	2.74783e-23
Sobic.006G221000	K00703	glgA; starch synthase [EC:2.4.1.21]	A09100 Metabolism	B 09101 Carbohydrate metabolism	C 00500 Starch and sucrose metabolism [PATH:ko00500]	-2.09157	1.11758e-05
Sobic.006G272900	K00432	gpx, btuE, bsaA; glutathione peroxidase [EC:1.11.1.9]	A09100 Metabolism	B 09103 Lipid metabolism	C 00590 Arachidonic acid metabolism [PATH:ko00590]	-4.05794	1.24866e-13
Sobic.006G255500	K01193	INV, sacA; beta-fructofuranosidase [EC:3.2.1.26]	A09100 Metabolism	B 09101 Carbohydrate metabolism	C 00052 Galactose metabolism [PATH:ko00052]	-12.4176	4.52557e-30
Sobic.006G193100	K20027	ZDHHC1_11; palmitoyltransferase ZDHHC1/11 [EC:2.3.1.225]	A09180 Brite Hierarchies	B 09182 Protein families: genetic information processing	C 04131 Membrane trafficking [BR:ko04131]	-2.27544	5.94108e-06
Sobic.006G096500	K01580	E4.1.1.15, gadB, gadA, GAD; glutamate decarboxylase [EC:4.1.1.15]	A09100 Metabolism	B 09101 Carbohydrate metabolism	C 00650 Butanoate metabolism [PATH:ko00650]	-2.61518	1.89624e-07
Sobic.006G227800	K08695	ANR; anthocyanidin reductase [EC:1.3.1.77]	A09100 Metabolism	B 09110 Biosynthesis of other secondary metabolites	C 00941 Flavonoid biosynthesis [PATH:ko00941]	-3.58298	1.58865e-05
Sobic.006G029300	K15505	RAD5; DNA repair protein RAD5 [EC:3.6.4.-]	A09180 Brite Hierarchies	B 09182 Protein families: genetic information processing	C 03400 DNA repair and recombination proteins [BR:ko03400]	-6.73978	0.0043009
Sobic.006G158800	K15095	E1.1.1.208; (+)-neomenthol dehydrogenase [EC:1.1.1.208]	A09100 Metabolism	B 09109 Metabolism of terpenoids and polyketides	C 00902 Monoterpenoid biosynthesis [PATH:ko00902]	-3.43408	3.75894e-10
Sobic.006G144700	K10683	BARD1; BRCA1-associated RING domain protein 1	A09120 Genetic Information Processing	B 09124 Replication and repair	C 03440 Homologous recombination [PATH:ko03440]	-3.97936	4.50549e-07
Sobic.006G264900	K03403	chlH, bchH; magnesium chelatase subunit H [EC:6.6.1.1]	A09100 Metabolism	B 09108 Metabolism of cofactors and vitamins	C 00860 Porphyrin and chlorophyll metabolism [PATH:ko00860]	-3.68953	3.02543e-14
Sobic.006G190100	K24028	DMR6, DLO; salicylic acid 3-hydroxylase [EC:1.14.11.-]	A09180 Brite Hierarchies	B 09191 Unclassified: metabolism	C 99980 Enzymes with EC numbers	-6.96025	0.00177936
Sobic.006G107500	K09422	MYBP; transcription factor MYB, plant	A09180 Brite Hierarchies	B 09182 Protein families: genetic information processing	C 03000 Transcription factors [BR:ko03000]	-10.251	2.11279e-16
Sobic.006G027300	K08176	PHO84; MFS transporter, PHS family, inorganic phosphate transporter	A09180 Brite Hierarchies	B 09183 Protein families: signaling and cellular processes	C 02000 Transporters [BR:ko02000]	-9.00206	4.80354e-10
Sobic.006G128500	K16223	FT; protein FLOWERING LOCUS T	A09150 Organismal Systems	B 09159 Environmental adaptation	0	-7.32024	0.000332542
Sobic.006G255600	K01193	INV, sacA; beta-fructofuranosidase [EC:3.2.1.26]	A09100 Metabolism	B 09101 Carbohydrate metabolism	C 00052 Galactose metabolism [PATH:ko00052]	-2.09807	1.0695e-05
Sobic.006G240300	K10882	EME1, MMS4; crossover junction endonuclease EME1 [EC:3.1.22.-]	A09120 Genetic Information Processing	B 09124 Replication and repair	C 03440 Homologous recombination [PATH:ko03440]	-3.05271	4.88253e-05
Sobic.006G105200	K01785	galM, GALM; aldose 1-epimerase [EC:5.1.3.3]	A09100 Metabolism	B 09101 Carbohydrate metabolism	C 00010 Glycolysis / Gluconeogenesis [PATH:ko00010]	-4.43772	1.47169e-13
Sobic.006G255300	K14486	K14486, ARF; auxin response factor	A09130 Environmental Information Processing	B 09132 Signal transduction	C 04075 Plant hormone signal transduction [PATH:ko04075]	-4.39364	9.29709e-09
Sobic.006G051000	K02685	PRI2; DNA primase large subunit	A09120 Genetic Information Processing	B 09124 Replication and repair	C 03030 DNA replication [PATH:ko03030]	-2.39155	0.00126615
Sobic.006G247800	K00430	E1.11.1.7; peroxidase [EC:1.11.1.7]	A09100 Metabolism	B 09110 Biosynthesis of other secondary metabolites	C 00940 Phenylpropanoid biosynthesis [PATH:ko00940]	-4.451	1.20112e-15
Sobic.006G021100	K00434	E1.11.1.11; L-ascorbate peroxidase [EC:1.11.1.11]	A09100 Metabolism	B 09101 Carbohydrate metabolism	C 00053 Ascorbate and aldarate metabolism [PATH:ko00053]	-3.68492	1.90079e-12
Sobic.006G234100	K02492	hemA; glutamyl-tRNA reductase [EC:1.2.1.70]	A09100 Metabolism	B 09108 Metabolism of cofactors and vitamins	C 00860 Porphyrin and chlorophyll metabolism [PATH:ko00860]	-3.38427	1.98721e-12
Sobic.006G093100	K00521	E1.16.1.7; ferric-chelate reductase [EC:1.16.1.7]	A09180 Brite Hierarchies	B 09191 Unclassified: metabolism	C 99980 Enzymes with EC numbers	-2.55153	7.1915e-08
Sobic.006G268200	K00218	por; protochlorophyllide reductase [EC:1.3.1.33]	A09100 Metabolism	B 09108 Metabolism of cofactors and vitamins	C 00860 Porphyrin and chlorophyll metabolism [PATH:ko00860]	-5.64389	7.97515e-27
Sobic.006G176700	K09872	PIP; aquaporin PIP	A09180 Brite Hierarchies	B 09183 Protein families: signaling and cellular processes	C 02000 Transporters [BR:ko02000]	-2.1377	6.21395e-06
Sobic.006G213100	K00972	UAP1; UDP-N-acetylglucosamine/UDP-N-acetylgalactosamine diphosphorylase [EC:2.7.7.23 2.7.7.83]	A09100 Metabolism	B 09101 Carbohydrate metabolism	C 00520 Amino sugar and nucleotide sugar metabolism [PATH:ko00520]	-2.62728	3.36724e-08
Sobic.006G097500	K09838	ZEP, ABA1; zeaxanthin epoxidase [EC:1.14.15.21]	A09100 Metabolism	B 09109 Metabolism of terpenoids and polyketides	C 00906 Carotenoid biosynthesis [PATH:ko00906]	-3.42556	1.20678e-12
Sobic.006G270300	K08472	MLO; mlo protein	A09180 Brite Hierarchies	B 09183 Protein families: signaling and cellular processes	C 04030 G protein-coupled receptors [BR:ko04030]	-4.05746	2.94167e-13
Sobic.006G194700	K10663	ATL4; E3 ubiquitin-protein ligase ATL4 [EC:2.3.2.27]	A09180 Brite Hierarchies	B 09182 Protein families: genetic information processing	C 04121 Ubiquitin system [BR:ko04121]	-3.04104	1.70875e-07
Sobic.006G208300	K14488	SAUR; SAUR family protein	A09130 Environmental Information Processing	B 09132 Signal transduction	C 04075 Plant hormone signal transduction [PATH:ko04075]	-7.54134	6.84272e-05
Sobic.006G214000	K00558	DNMT1, dcm; DNA (cytosine-5)-methyltransferase 1 [EC:2.1.1.37]	A09100 Metabolism	B 09105 Amino acid metabolism	C 00270 Cysteine and methionine metabolism [PATH:ko00270]	-11.6809	3.44235e-25
Sobic.006G163300	K00128	ALDH; aldehyde dehydrogenase (NAD+) [EC:1.2.1.3]	A09100 Metabolism	B 09101 Carbohydrate metabolism	C 00010 Glycolysis / Gluconeogenesis [PATH:ko00010]	-2.34827	1.49764e-06
Sobic.006G076400	K11253	H3; histone H3	A09150 Organismal Systems	B 09151 Immune system	C 04613 Neutrophil extracellular trap formation [PATH:ko04613]	-3.94153	1.16943e-11
Sobic.006G270400	K15377	SLC44A2_4_5; solute carrier family 44 (choline transporter-like protein), member 2/4/5	A09160 Human Diseases	B 09161 Cancer: overview	0	-2.11252	1.61325e-05
Sobic.006G058000	K16297	SCPL-II; serine carboxypeptidase-like clade II [EC:3.4.16.-]	A09180 Brite Hierarchies	B 09181 Protein families: metabolism	C 01002 Peptidases and inhibitors [BR:ko01002]	-3.41838	2.07239e-11
Sobic.006G220500	K11517	HAO; (S)-2-hydroxy-acid oxidase [EC:1.1.3.15]	A09100 Metabolism	B 09101 Carbohydrate metabolism	C 00630 Glyoxylate and dicarboxylate metabolism [PATH:ko00630]	-7.47134	0.000101063
Sobic.006G109100	K01658	trpG; anthranilate synthase component II [EC:4.1.3.27]	A09100 Metabolism	B 09105 Amino acid metabolism	C 00400 Phenylalanine, tyrosine and tryptophan biosynthesis [PATH:ko00400]	-2.14312	1.07497e-05
Sobic.006G204500	K19882	NOTUM; O-palmitoleoyl-L-serine hydrolase [EC:3.1.1.98]	A09130 Environmental Information Processing	B 09132 Signal transduction	C 04310 Wnt signaling pathway [PATH:ko04310]	-2.88296	5.03613e-09
Sobic.002G385400	K02608	ORC6; origin recognition complex subunit 6	A09140 Cellular Processes	B 09143 Cell growth and death	C 04110 Cell cycle [PATH:ko04110]	-3.03508	1.76054e-05
Sobic.002G055700	K01183	E3.2.1.14; chitinase [EC:3.2.1.14]	A09100 Metabolism	B 09101 Carbohydrate metabolism	C 00520 Amino sugar and nucleotide sugar metabolism [PATH:ko00520]	-2.83954	3.32842e-05
Sobic.002G315500	K21437	ANKRD13; ankyrin repeat domain-containing protein 13	A09180 Brite Hierarchies	B 09182 Protein families: genetic information processing	C 04131 Membrane trafficking [BR:ko04131]	-2.01278	0.000220448
Sobic.002G311200	K03327	TC.MATE, SLC47A, norM, mdtK, dinF; multidrug resistance protein, MATE family	A09180 Brite Hierarchies	B 09183 Protein families: signaling and cellular processes	C 02000 Transporters [BR:ko02000]	-2.13401	0.000118051
Sobic.002G289100	K08912	LHCB1; light-harvesting complex II chlorophyll a/b binding protein 1	A09100 Metabolism	B 09102 Energy metabolism	C 00196 Photosynthesis - antenna proteins [PATH:ko00196]	-5.12361	1.34306e-20
Sobic.002G353800	K09338	HD-ZIP; homeobox-leucine zipper protein	A09180 Brite Hierarchies	B 09182 Protein families: genetic information processing	C 03000 Transcription factors [BR:ko03000]	-7.79164	1.54529e-05
Sobic.002G390800	K10400	KIF15; kinesin family member 15	A09180 Brite Hierarchies	B 09183 Protein families: signaling and cellular processes	C 04812 Cytoskeleton proteins [BR:ko04812]	-2.04123	0.000117074
Sobic.002G073700	K00559	SMT1, ERG6; sterol 24-C-methyltransferase [EC:2.1.1.41]	A09100 Metabolism	B 09103 Lipid metabolism	C 00100 Steroid biosynthesis [PATH:ko00100]	-2.18213	4.90724e-06
Sobic.002G288300	K08912	LHCB1; light-harvesting complex II chlorophyll a/b binding protein 1	A09100 Metabolism	B 09102 Energy metabolism	C 00196 Photosynthesis - antenna proteins [PATH:ko00196]	-4.54576	1.13455e-19
Sobic.002G059200	K11251	H2A; histone H2A	A09140 Cellular Processes	B 09143 Cell growth and death	C 04217 Necroptosis [PATH:ko04217]	-2.33328	1.45208e-06
Sobic.002G379100	K00121	frmA, ADH5, adhC; S-(hydroxymethyl)glutathione dehydrogenase / alcohol dehydrogenase [EC:1.1.1.284 1.1.1.1]	A09100 Metabolism	B 09101 Carbohydrate metabolism	C 00010 Glycolysis / Gluconeogenesis [PATH:ko00010]	-2.03691	0.0031679
Sobic.002G204400	K11498	CENPE; centromeric protein E	A09180 Brite Hierarchies	B 09181 Protein families: metabolism	C 01009 Protein phosphatases and associated proteins [BR:ko01009]	-2.05064	0.000506909
Sobic.002G427100	K10728	TOPBP1; topoisomerase (DNA) II binding protein 1	A09120 Genetic Information Processing	B 09124 Replication and repair	C 03440 Homologous recombination [PATH:ko03440]	-9.20979	5.25998e-11
Sobic.002G221800	K17279	REEP5_6; receptor expression-enhancing protein 5/6	A09180 Brite Hierarchies	B 09183 Protein families: signaling and cellular processes	C 04147 Exosome [BR:ko04147]	-2.42842	0.00019425
Sobic.002G116000	K13679	WAXY; granule-bound starch synthase [EC:2.4.1.242]	A09100 Metabolism	B 09101 Carbohydrate metabolism	C 00500 Starch and sucrose metabolism [PATH:ko00500]	-2.93786	2.57023e-09
Sobic.002G381400	K01087	otsB; trehalose 6-phosphate phosphatase [EC:3.1.3.12]	A09100 Metabolism	B 09101 Carbohydrate metabolism	C 00500 Starch and sucrose metabolism [PATH:ko00500]	-3.00487	1.5224e-06
Sobic.002G297500	K22761	PRIMPOL; DNA-directed primase/polymerase protein [EC:2.7.7.102 2.7.7.7]	A09180 Brite Hierarchies	B 09182 Protein families: genetic information processing	C 03400 DNA repair and recombination proteins [BR:ko03400]	-3.11474	2.19115e-07
Sobic.002G403700	K06677	YCS4, CNAP1, CAPD2; condensin complex subunit 1	A09140 Cellular Processes	B 09143 Cell growth and death	C 04111 Cell cycle - yeast [PATH:ko04111]	-3.57935	1.18444e-10
Sobic.002G420000	K03654	recQ; ATP-dependent DNA helicase RecQ [EC:3.6.4.12]	A09120 Genetic Information Processing	B 09123 Folding, sorting and degradation	C 03018 RNA degradation [PATH:ko03018]	-2.40043	0.0196934
Sobic.002G108800	K24139	PILS, ECM3; auxin efflux carrier family protein	A09180 Brite Hierarchies	B 09183 Protein families: signaling and cellular processes	C 02000 Transporters [BR:ko02000]	-7.47134	0.000101063
Sobic.002G352100	K08908	LHCA2; light-harvesting complex I chlorophyll a/b binding protein 2	A09100 Metabolism	B 09102 Energy metabolism	C 00196 Photosynthesis - antenna proteins [PATH:ko00196]	-4.47165	3.39175e-19
Sobic.002G367700	K14638	SLC15A3_4, PHT; solute carrier family 15 (peptide/histidine transporter), member 3/4	A09180 Brite Hierarchies	B 09183 Protein families: signaling and cellular processes	C 02000 Transporters [BR:ko02000]	-3.26155	1.31377e-11
Sobic.002G271600	K07904	RAB11A; Ras-related protein Rab-11A	A09140 Cellular Processes	B 09141 Transport and catabolism	C 04144 Endocytosis [PATH:ko04144]	-2.08464	1.4457e-05
Sobic.002G125700	K09872	PIP; aquaporin PIP	A09180 Brite Hierarchies	B 09183 Protein families: signaling and cellular processes	C 02000 Transporters [BR:ko02000]	-3.41378	2.97091e-08
Sobic.002G334100	K20924	CSLD; cellulose synthase-like protein [EC:2.4.1.-]	A09180 Brite Hierarchies	B 09181 Protein families: metabolism	C 01003 Glycosyltransferases [BR:ko01003]	-12.0364	1.39859e-27
Sobic.002G117100	K08818	CDC2L; cell division cycle 2-like [EC:2.7.11.22]	A09180 Brite Hierarchies	B 09181 Protein families: metabolism	C 01001 Protein kinases [BR:ko01001]	-6.32924	0.0172452
Sobic.002G107000	K09842	AAO3; abscisic-aldehyde oxidase [EC:1.2.3.14]	A09100 Metabolism	B 09109 Metabolism of terpenoids and polyketides	C 00906 Carotenoid biosynthesis [PATH:ko00906]	-2.0816	1.23229e-05
Sobic.002G256000	K00224	CEQORH; chloroplastic oxoene reductase [EC:1.3.1.-]	A09100 Metabolism	B 09103 Lipid metabolism	C 00592 alpha-Linolenic acid metabolism [PATH:ko00592]	-2.53889	1.27641e-07
Sobic.002G062600	K13457	RPM1, RPS3; disease resistance protein RPM1	A09150 Organismal Systems	B 09159 Environmental adaptation	0	-7.05901	0.00115619
Sobic.002G003700	K00430	E1.11.1.7; peroxidase [EC:1.11.1.7]	A09100 Metabolism	B 09110 Biosynthesis of other secondary metabolites	C 00940 Phenylpropanoid biosynthesis [PATH:ko00940]	-3.04275	5.67784e-06
Sobic.002G219500	K08900	BCS1; mitochondrial chaperone BCS1	A09180 Brite Hierarchies	B 09182 Protein families: genetic information processing	C 03029 Mitochondrial biogenesis [BR:ko03029]	-2.88523	3.83351e-05
Sobic.002G232500	K03327	TC.MATE, SLC47A, norM, mdtK, dinF; multidrug resistance protein, MATE family	A09180 Brite Hierarchies	B 09183 Protein families: signaling and cellular processes	C 02000 Transporters [BR:ko02000]	-4.6377	2.30118e-07
Sobic.002G401200	K16297	SCPL-II; serine carboxypeptidase-like clade II [EC:3.4.16.-]	A09180 Brite Hierarchies	B 09181 Protein families: metabolism	C 01002 Peptidases and inhibitors [BR:ko01002]	-2.24867	3.28407e-06
Sobic.002G324000	K01637	E4.1.3.1, aceA; isocitrate lyase [EC:4.1.3.1]	A09100 Metabolism	B 09101 Carbohydrate metabolism	C 00630 Glyoxylate and dicarboxylate metabolism [PATH:ko00630]	-8.53747	4.97654e-08
Sobic.002G276000	K11251	H2A; histone H2A	A09140 Cellular Processes	B 09143 Cell growth and death	C 04217 Necroptosis [PATH:ko04217]	-3.04867	6.61853e-10
Sobic.002G319300	K16743	ASPM, ASP; abnormal spindle-like microcephaly-associated protein	A09180 Brite Hierarchies	B 09182 Protein families: genetic information processing	C 03036 Chromosome and associated proteins [BR:ko03036]	-5.4295	1.25419e-12
Sobic.002G230900	K18810	CYCD1_2_4; cyclin D1/2/4, plant	A09180 Brite Hierarchies	B 09193 Unclassified: signaling and cellular processes	C 99995 Signaling proteins	-2.03575	9.89481e-05
Sobic.002G037700	K10891	FANCD2; fanconi anemia group D2 protein	A09120 Genetic Information Processing	B 09124 Replication and repair	C 03460 Fanconi anemia pathway [PATH:ko03460]	-2.47796	0.0106067
Sobic.002G416600	K00430	E1.11.1.7; peroxidase [EC:1.11.1.7]	A09100 Metabolism	B 09110 Biosynthesis of other secondary metabolites	C 00940 Phenylpropanoid biosynthesis [PATH:ko00940]	-8.23352	5.32305e-07
Sobic.002G338000	K08915	LHCB4; light-harvesting complex II chlorophyll a/b binding protein 4	A09100 Metabolism	B 09102 Energy metabolism	C 00196 Photosynthesis - antenna proteins [PATH:ko00196]	-2.19084	3.50336e-06
Sobic.002G379000	K02267	COX6B; cytochrome c oxidase subunit 6b	A09100 Metabolism	B 09102 Energy metabolism	C 00190 Oxidative phosphorylation [PATH:ko00190]	-6.47945	0.0107979
Sobic.002G362700	K20027	ZDHHC1_11; palmitoyltransferase ZDHHC1/11 [EC:2.3.1.225]	A09180 Brite Hierarchies	B 09182 Protein families: genetic information processing	C 04131 Membrane trafficking [BR:ko04131]	-2.72551	4.10515e-08
Sobic.002G390700	K16315	GSG2; serine/threonine-protein kinase haspin [EC:2.7.11.1]	A09180 Brite Hierarchies	B 09181 Protein families: metabolism	C 01001 Protein kinases [BR:ko01001]	-8.7593	5.67049e-09
Sobic.002G329500	K01177	E3.2.1.2; beta-amylase [EC:3.2.1.2]	A09100 Metabolism	B 09101 Carbohydrate metabolism	C 00500 Starch and sucrose metabolism [PATH:ko00500]	-3.08692	1.40882e-10
Sobic.002G206700	K01611	speD, AMD1; S-adenosylmethionine decarboxylase [EC:4.1.1.50]	A09100 Metabolism	B 09105 Amino acid metabolism	C 00270 Cysteine and methionine metabolism [PATH:ko00270]	-2.30537	5.03078e-06
Sobic.002G273500	K01179	E3.2.1.4; endoglucanase [EC:3.2.1.4]	A09100 Metabolism	B 09101 Carbohydrate metabolism	C 00500 Starch and sucrose metabolism [PATH:ko00500]	-9.55257	1.28594e-12
Sobic.002G339200	K08914	LHCB3; light-harvesting complex II chlorophyll a/b binding protein 3	A09100 Metabolism	B 09102 Energy metabolism	C 00196 Photosynthesis - antenna proteins [PATH:ko00196]	-5.74748	1.30962e-27
Sobic.002G191000	K20606	ANP1; mitogen-activated protein kinase kinase kinase ANP1 [EC:2.7.11.25]	A09130 Environmental Information Processing	B 09132 Signal transduction	C 04016 MAPK signaling pathway - plant [PATH:ko04016]	-2.43982	2.97692e-05
Sobic.002G184600	K01087	otsB; trehalose 6-phosphate phosphatase [EC:3.1.3.12]	A09100 Metabolism	B 09101 Carbohydrate metabolism	C 00500 Starch and sucrose metabolism [PATH:ko00500]	-2.82389	4.11392e-09
Sobic.002G415600	K09286	EREBP; EREBP-like factor	A09180 Brite Hierarchies	B 09182 Protein families: genetic information processing	C 03000 Transcription factors [BR:ko03000]	-2.08505	0.0188587
Sobic.002G313000	K16812	TPX2; targeting protein for Xklp2	A09180 Brite Hierarchies	B 09182 Protein families: genetic information processing	C 03036 Chromosome and associated proteins [BR:ko03036]	-4.01023	2.92524e-12
Sobic.002G194700	K16055	TPS; trehalose 6-phosphate synthase/phosphatase [EC:2.4.1.15 3.1.3.12]	A09100 Metabolism	B 09101 Carbohydrate metabolism	C 00500 Starch and sucrose metabolism [PATH:ko00500]	-3.09102	2.24407e-10
Sobic.002G275200	K20291	COG4, COD1; conserved oligomeric Golgi complex subunit 4	A09180 Brite Hierarchies	B 09182 Protein families: genetic information processing	C 04131 Membrane trafficking [BR:ko04131]	-2.19856	1.71307e-05
Sobic.002G350400	K07374	TUBA; tubulin alpha	A09140 Cellular Processes	B 09141 Transport and catabolism	C 04145 Phagosome [PATH:ko04145]	-2.22381	2.59271e-06
Sobic.002G278700	K01166	RNASET2; ribonuclease T2 [EC:4.6.1.19]	A09180 Brite Hierarchies	B 09182 Protein families: genetic information processing	C 03016 Transfer RNA biogenesis [BR:ko03016]	-6.32924	0.0172452
Sobic.002G179700	K15397	KCS; 3-ketoacyl-CoA synthase [EC:2.3.1.199]	A09100 Metabolism	B 09103 Lipid metabolism	C 00062 Fatty acid elongation [PATH:ko00062]	-4.11343	2.4361e-16
Sobic.002G032700	K03541	psbR; photosystem II 10kDa protein	A09100 Metabolism	B 09102 Energy metabolism	C 00195 Photosynthesis [PATH:ko00195]	-2.74884	2.23278e-08
Sobic.002G430700	K20869	IRX9; putative beta-1,4-xylosyltransferase IRX9 [EC:2.4.2.-]	A09180 Brite Hierarchies	B 09181 Protein families: metabolism	C 01003 Glycosyltransferases [BR:ko01003]	-2.77446	2.21947e-07
Sobic.002G162300	K11270	CTF8; chromosome transmission fidelity protein 8	A09180 Brite Hierarchies	B 09182 Protein families: genetic information processing	C 03036 Chromosome and associated proteins [BR:ko03036]	-2.82141	0.000853863
Sobic.002G004100	K10405	KIFC1; kinesin family member C1	A09180 Brite Hierarchies	B 09182 Protein families: genetic information processing	C 03036 Chromosome and associated proteins [BR:ko03036]	-3.47485	2.26991e-10
Sobic.002G258300	K00430	E1.11.1.7; peroxidase [EC:1.11.1.7]	A09100 Metabolism	B 09110 Biosynthesis of other secondary metabolites	C 00940 Phenylpropanoid biosynthesis [PATH:ko00940]	-10.2922	1.12552e-16
Sobic.002G368600	K13379	RGP, UTM; reversibly glycosylated polypeptide / UDP-arabinopyranose mutase [EC:2.4.1.- 5.4.99.30]	A09100 Metabolism	B 09101 Carbohydrate metabolism	C 00520 Amino sugar and nucleotide sugar metabolism [PATH:ko00520]	-3.8608	1.95652e-13
Sobic.002G073600	K24193	STP; MFS transporter, SP family, sugar:H+ symporter	A09180 Brite Hierarchies	B 09183 Protein families: signaling and cellular processes	C 02000 Transporters [BR:ko02000]	-7.73302	2.22632e-05
Sobic.002G389100	K20660	CYP709; cytochrome P450 family 709	A09180 Brite Hierarchies	B 09181 Protein families: metabolism	C 00199 Cytochrome P450 [BR:ko00199]	-3.1012	1.72444e-09
Sobic.002G275100	K12130	PRR5; pseudo-response regulator 5	A09150 Organismal Systems	B 09159 Environmental adaptation	0	-5.00238	3.45993e-22
Sobic.002G111500	K10781	FATB; fatty acyl-ACP thioesterase B [EC:3.1.2.14 3.1.2.21]	A09100 Metabolism	B 09103 Lipid metabolism	C 00061 Fatty acid biosynthesis [PATH:ko00061]	-3.40692	3.73623e-12
Sobic.002G253500	K00306	PIPOX; sarcosine oxidase / L-pipecolate oxidase [EC:1.5.3.1 1.5.3.7]	A09100 Metabolism	B 09105 Amino acid metabolism	C 00260 Glycine, serine and threonine metabolism [PATH:ko00260]	-2.05275	2.77307e-05
Sobic.002G225400	K09843	CYP707A; (+)-abscisic acid 8'-hydroxylase [EC:1.14.14.137]	A09100 Metabolism	B 09109 Metabolism of terpenoids and polyketides	C 00906 Carotenoid biosynthesis [PATH:ko00906]	-2.1457	2.86268e-05
Sobic.002G390500	K00898	PDK2_3_4; pyruvate dehydrogenase kinase 2/3/4 [EC:2.7.11.2]	A09160 Human Diseases	B 09166 Cardiovascular disease	0	-3.02707	2.72555e-10
Sobic.002G055600	K01183	E3.2.1.14; chitinase [EC:3.2.1.14]	A09100 Metabolism	B 09101 Carbohydrate metabolism	C 00520 Amino sugar and nucleotide sugar metabolism [PATH:ko00520]	-9.35292	1.23523e-11
Sobic.002G037400	K09840	NCED; 9-cis-epoxycarotenoid dioxygenase [EC:1.13.11.51]	A09100 Metabolism	B 09109 Metabolism of terpenoids and polyketides	C 00906 Carotenoid biosynthesis [PATH:ko00906]	-6.85422	0.00276094
Sobic.002G282100	K11584	PPP2R5; serine/threonine-protein phosphatase 2A regulatory subunit B'	A09120 Genetic Information Processing	B 09122 Translation	C 03015 mRNA surveillance pathway [PATH:ko03015]	-3.98081	3.0767e-11
Sobic.002G351100	K04482	RAD51; DNA repair protein RAD51	A09120 Genetic Information Processing	B 09124 Replication and repair	C 03440 Homologous recombination [PATH:ko03440]	-8.57132	2.83823e-08
Sobic.002G124700	K09872	PIP; aquaporin PIP	A09180 Brite Hierarchies	B 09183 Protein families: signaling and cellular processes	C 02000 Transporters [BR:ko02000]	-2.99628	3.13637e-10
Sobic.002G194500	K08235	E2.4.1.207; xyloglucan:xyloglucosyl transferase [EC:2.4.1.207]	A09180 Brite Hierarchies	B 09191 Unclassified: metabolism	C 99980 Enzymes with EC numbers	-2.41305	0.000119538
Sobic.002G003200	K00430	E1.11.1.7; peroxidase [EC:1.11.1.7]	A09100 Metabolism	B 09110 Biosynthesis of other secondary metabolites	C 00940 Phenylpropanoid biosynthesis [PATH:ko00940]	-2.30628	1.31204e-06
Sobic.002G224200	K09419	HSFF; heat shock transcription factor, other eukaryote	A09180 Brite Hierarchies	B 09182 Protein families: genetic information processing	C 03000 Transcription factors [BR:ko03000]	-8.87226	2.04881e-09
Sobic.002G040400	K20623	CYP92A6; typhasterol/6-deoxotyphasterol 2alpha-hydroxylase	A09100 Metabolism	B 09109 Metabolism of terpenoids and polyketides	C 00905 Brassinosteroid biosynthesis [PATH:ko00905]	-9.00206	4.80354e-10
Sobic.002G175400	K21737	ACET6, DES6; acyl-lipid Delta6-acetylenase / acyl-lipid (9-3)-desaturase [EC:1.14.19.38 1.14.19.47]	A09180 Brite Hierarchies	B 09191 Unclassified: metabolism	C 99980 Enzymes with EC numbers	-2.67721	2.83823e-08
Sobic.002G245300	K14445	SLC13A2_3_5; solute carrier family 13 (sodium-dependent dicarboxylate transporter), member 2/3/5	A09180 Brite Hierarchies	B 09183 Protein families: signaling and cellular processes	C 02000 Transporters [BR:ko02000]	-6.42885	2.10217e-26
Sobic.002G374600	K09458	fabF, OXSM, CEM1; 3-oxoacyl-[acyl-carrier-protein] synthase II [EC:2.3.1.179]	A09100 Metabolism	B 09103 Lipid metabolism	C 00061 Fatty acid biosynthesis [PATH:ko00061]	-2.40682	4.27976e-07
Sobic.002G196600	K00921	PIKFYVE, FAB1; 1-phosphatidylinositol-3-phosphate 5-kinase [EC:2.7.1.150]	A09100 Metabolism	B 09101 Carbohydrate metabolism	C 00562 Inositol phosphate metabolism [PATH:ko00562]	-2.2368	4.06436e-06
Sobic.002G173900	K08237	E2.4.1.218; hydroquinone glucosyltransferase [EC:2.4.1.218]	A09180 Brite Hierarchies	B 09181 Protein families: metabolism	C 01003 Glycosyltransferases [BR:ko01003]	-2.44962	3.72521e-07
Sobic.002G062700	K13457	RPM1, RPS3; disease resistance protein RPM1	A09150 Organismal Systems	B 09159 Environmental adaptation	0	-2.49083	4.47536e-06
Sobic.002G383900	K04713	SUR2; sphinganine C4-monooxygenase [EC:1.14.18.5]	A09100 Metabolism	B 09103 Lipid metabolism	C 00600 Sphingolipid metabolism [PATH:ko00600]	-2.02815	0.000122782
Sobic.002G287000	K00485	FMO; dimethylaniline monooxygenase (N-oxide forming) [EC:1.14.13.8]	A09100 Metabolism	B 09111 Xenobiotics biodegradation and metabolism	C 00982 Drug metabolism - cytochrome P450 [PATH:ko00982]	-4.26342	4.53779e-17
Sobic.002G323700	K08486	STX1B_2_3; syntaxin 1B/2/3	A09120 Genetic Information Processing	B 09123 Folding, sorting and degradation	C 04130 SNARE interactions in vesicular transport [PATH:ko04130]	-7.23831	0.000499811
Sobic.002G038500	K08064	NFYA, HAP2; nuclear transcription factor Y, alpha	A09150 Organismal Systems	B 09151 Immune system	C 04612 Antigen processing and presentation [PATH:ko04612]	-4.73649	5.48591e-14

## Sheet: Tx2783_9dpi
Gene ID	KO	Gene name	Tier 1	Tier 2	Tier 3	Log2-fold change	p-adjusted
Sobic.010G252900	K05681	ABCG2, CD338; ATP-binding cassette, subfamily G (WHITE), member 2	A09130 Environmental Information Processing	B 09131 Membrane transport	C 02010 ABC transporters [PATH:ko02010]	3.01106	0.0695085
Sobic.010G136000	K01187	malZ; alpha-glucosidase [EC:3.2.1.20]	A09100 Metabolism	B 09101 Carbohydrate metabolism	C 00052 Galactose metabolism [PATH:ko00052]	2.3192	0.00068675
Sobic.010G150325	K15687	MKRN; E3 ubiquitin-protein ligase makorin [EC:2.3.2.27]	A09180 Brite Hierarchies	B 09182 Protein families: genetic information processing	C 04121 Ubiquitin system [BR:ko04121]	4.69818	2.55e-07
Sobic.010G084600	K05894	OPR; 12-oxophytodienoic acid reductase [EC:1.3.1.42]	A09100 Metabolism	B 09103 Lipid metabolism	C 00592 alpha-Linolenic acid metabolism [PATH:ko00592]	8.73756	4.76e-09
Sobic.010G197300	K13680	CSLA; beta-mannan synthase [EC:2.4.1.32]	A09180 Brite Hierarchies	B 09181 Protein families: metabolism	C 01003 Glycosyltransferases [BR:ko01003]	6.0435	0.044687
Sobic.010G188900	K09419	HSFF; heat shock transcription factor, other eukaryote	A09180 Brite Hierarchies	B 09182 Protein families: genetic information processing	C 03000 Transcription factors [BR:ko03000]	2.33677	6.23e-05
Sobic.010G234000	K20280	TRAPPC5, TRS31; trafficking protein particle complex subunit 5	A09180 Brite Hierarchies	B 09182 Protein families: genetic information processing	C 04131 Membrane trafficking [BR:ko04131]	3.73723	1.15e-13
Sobic.010G032500	K15102	SLC25A3, PHC, PIC; solute carrier family 25 (mitochondrial phosphate transporter), member 3	A09180 Brite Hierarchies	B 09183 Protein families: signaling and cellular processes	C 02000 Transporters [BR:ko02000]	4.24099	4.22e-07
Sobic.010G171900	K00423	E1.10.3.3; L-ascorbate oxidase [EC:1.10.3.3]	A09100 Metabolism	B 09101 Carbohydrate metabolism	C 00053 Ascorbate and aldarate metabolism [PATH:ko00053]	3.13025	9.73e-08
Sobic.010G104300	K13993	HSP20; HSP20 family protein	A09120 Genetic Information Processing	B 09123 Folding, sorting and degradation	C 04141 Protein processing in endoplasmic reticulum [PATH:ko04141]	6.19331	0.0278827
Sobic.010G128700	K00430	E1.11.1.7; peroxidase [EC:1.11.1.7]	A09100 Metabolism	B 09110 Biosynthesis of other secondary metabolites	C 00940 Phenylpropanoid biosynthesis [PATH:ko00940]	2.25682	0.00010608
Sobic.010G274600	K14768	UTP7, WDR46; U3 small nucleolar RNA-associated protein 7	A09180 Brite Hierarchies	B 09182 Protein families: genetic information processing	C 03009 Ribosome biogenesis [BR:ko03009]	2.06053	4.58e-05
Sobic.010G085400	K15397	KCS; 3-ketoacyl-CoA synthase [EC:2.3.1.199]	A09100 Metabolism	B 09103 Lipid metabolism	C 00062 Fatty acid elongation [PATH:ko00062]	4.25794	1.03e-10
Sobic.010G165200	K00423	E1.10.3.3; L-ascorbate oxidase [EC:1.10.3.3]	A09100 Metabolism	B 09101 Carbohydrate metabolism	C 00053 Ascorbate and aldarate metabolism [PATH:ko00053]	2.58463	3.02e-07
Sobic.010G095400	K20989	DUR3; urea-proton symporter	A09180 Brite Hierarchies	B 09183 Protein families: signaling and cellular processes	C 02000 Transporters [BR:ko02000]	3.14388	3.52e-10
Sobic.010G127100	K22530	ATAD1; ATPase family AAA domain-containing protein 1 [EC:3.6.1.-]	A09180 Brite Hierarchies	B 09191 Unclassified: metabolism	C 99980 Enzymes with EC numbers	3.05495	5.41e-05
Sobic.010G222100	K23877	AXY4, AXY4L; xyloglucan O-acetyltransferase	A09180 Brite Hierarchies	B 09191 Unclassified: metabolism	C 99986 Glycan metabolism	2.82184	0.00216402
Sobic.010G210300	K17086	TM9SF2_4; transmembrane 9 superfamily member 2/4	A09180 Brite Hierarchies	B 09183 Protein families: signaling and cellular processes	C 04147 Exosome [BR:ko04147]	2.55202	2.05e-06
Sobic.010G252700	K03349	APC2, ANAPC2; anaphase-promoting complex subunit 2	A09120 Genetic Information Processing	B 09123 Folding, sorting and degradation	C 04120 Ubiquitin mediated proteolysis [PATH:ko04120]	2.82569	1.05e-07
Sobic.010G108600	K15397	KCS; 3-ketoacyl-CoA synthase [EC:2.3.1.199]	A09100 Metabolism	B 09103 Lipid metabolism	C 00062 Fatty acid elongation [PATH:ko00062]	2.57628	0.00042477
Sobic.010G015300	K15889	PCME; prenylcysteine alpha-carboxyl methylesterase [EC:3.1.1.-]	A09100 Metabolism	B 09109 Metabolism of terpenoids and polyketides	C 00900 Terpenoid backbone biosynthesis [PATH:ko00900]	7.18342	0.00052673
Sobic.010G064000	K00430	E1.11.1.7; peroxidase [EC:1.11.1.7]	A09100 Metabolism	B 09110 Biosynthesis of other secondary metabolites	C 00940 Phenylpropanoid biosynthesis [PATH:ko00940]	8.89895	1.07e-09
Sobic.010G035900	K25897	#N/A	#N/A	#N/A	#N/A	2.06087	0.125574
Sobic.010G192366	K14431	TGA; transcription factor TGA	A09130 Environmental Information Processing	B 09132 Signal transduction	C 04075 Plant hormone signal transduction [PATH:ko04075]	4.1175	1.16e-06
Sobic.010G121000	K13457	RPM1, RPS3; disease resistance protein RPM1	A09150 Organismal Systems	B 09159 Environmental adaptation	0	2.46516	0.00024202
Sobic.010G210200	K17086	TM9SF2_4; transmembrane 9 superfamily member 2/4	A09180 Brite Hierarchies	B 09183 Protein families: signaling and cellular processes	C 04147 Exosome [BR:ko04147]	2.93752	7.67e-09
Sobic.010G277700	K00791	miaA, TRIT1; tRNA dimethylallyltransferase [EC:2.5.1.75]	A09100 Metabolism	B 09109 Metabolism of terpenoids and polyketides	C 00908 Zeatin biosynthesis [PATH:ko00908]	2.53571	3.45e-05
Sobic.010G076200	K13096	SF4, SUGP1; splicing factor 4	A09180 Brite Hierarchies	B 09182 Protein families: genetic information processing	C 03041 Spliceosome [BR:ko03041]	2.40683	2.96e-05
Sobic.010G108200	K15397	KCS; 3-ketoacyl-CoA synthase [EC:2.3.1.199]	A09100 Metabolism	B 09103 Lipid metabolism	C 00062 Fatty acid elongation [PATH:ko00062]	7.10994	0.00079481
Sobic.010G104600	K17991	PXG; peroxygenase [EC:1.11.2.3]	A09100 Metabolism	B 09103 Lipid metabolism	C 00073 Cutin, suberine and wax biosynthesis [PATH:ko00073]	5.46943	0.116131
Sobic.010G272000	K14662	NTAN1; protein N-terminal asparagine amidohydrolase [EC:3.5.1.121]	A09180 Brite Hierarchies	B 09191 Unclassified: metabolism	C 99980 Enzymes with EC numbers	3.00959	0.00768374
Sobic.010G167500	K00924	E2.7.1.-; kinase [EC:2.7.1.-]	A09180 Brite Hierarchies	B 09191 Unclassified: metabolism	C 99980 Enzymes with EC numbers	2.4402	4.55e-07
Sobic.010G084700	K23869	GALS; galactan beta-1,4-galactosyltransferase [EC:2.4.1.-]	A09180 Brite Hierarchies	B 09181 Protein families: metabolism	C 01003 Glycosyltransferases [BR:ko01003]	9.63471	3.34e-13
Sobic.010G087000	K13413	MKK4_5; mitogen-activated protein kinase kinase 4/5 [EC:2.7.12.2]	A09130 Environmental Information Processing	B 09132 Signal transduction	C 04016 MAPK signaling pathway - plant [PATH:ko04016]	6.6731	0.00450477
Sobic.010G192432	K14431	TGA; transcription factor TGA	A09130 Environmental Information Processing	B 09132 Signal transduction	C 04075 Plant hormone signal transduction [PATH:ko04075]	2.63724	3e-05
Sobic.010G084400	K05894	OPR; 12-oxophytodienoic acid reductase [EC:1.3.1.42]	A09100 Metabolism	B 09103 Lipid metabolism	C 00592 alpha-Linolenic acid metabolism [PATH:ko00592]	6.95071	0.00121448
Sobic.010G020200	K24770	DSE1, ALT2, EMB2757; protein decreased size exclusion limit 1	A09180 Brite Hierarchies	B 09182 Protein families: genetic information processing	C 03400 DNA repair and recombination proteins [BR:ko03400]	2.35881	1.82e-05
Sobic.010G107400	K15397	KCS; 3-ketoacyl-CoA synthase [EC:2.3.1.199]	A09100 Metabolism	B 09103 Lipid metabolism	C 00062 Fatty acid elongation [PATH:ko00062]	2.18478	1.97e-05
Sobic.010G066700	K08819	CDK12_13; cyclin-dependent kinase 12/13 [EC:2.7.11.22 2.7.11.23]	A09180 Brite Hierarchies	B 09181 Protein families: metabolism	C 01001 Protein kinases [BR:ko01001]	3.33825	1.47e-08
Sobic.010G245500	K23025	AVP; H+-translocating diphosphatase [EC:7.1.3.1]	A09180 Brite Hierarchies	B 09183 Protein families: signaling and cellular processes	C 02000 Transporters [BR:ko02000]	3.98774	1.16e-10
Sobic.010G155300	K03841	FBP, fbp; fructose-1,6-bisphosphatase I [EC:3.1.3.11]	A09100 Metabolism	B 09101 Carbohydrate metabolism	C 00010 Glycolysis / Gluconeogenesis [PATH:ko00010]	3.88649	4.86e-12
Sobic.010G092801	K12236	NFX1; transcriptional repressor NF-X1	A09160 Human Diseases	B 09172 Infectious disease: viral	0	5.44243	1.35e-10
Sobic.010G238600	K01534	zntA; Zn2+/Cd2+-exporting ATPase [EC:7.2.2.12 7.2.2.21]	A09180 Brite Hierarchies	B 09191 Unclassified: metabolism	C 99980 Enzymes with EC numbers	2.55162	4.4e-05
Sobic.010G272700	K07195	EXOC7, EXO70; exocyst complex component 7	A09150 Organismal Systems	B 09152 Endocrine system	0	8.2486	4.25e-07
Sobic.010G256932	K03327	TC.MATE, SLC47A, norM, mdtK, dinF; multidrug resistance protein, MATE family	A09180 Brite Hierarchies	B 09183 Protein families: signaling and cellular processes	C 02000 Transporters [BR:ko02000]	2.08085	0.00020442
Sobic.010G221100	K01853	CAS1; cycloartenol synthase [EC:5.4.99.8]	A09100 Metabolism	B 09103 Lipid metabolism	C 00100 Steroid biosynthesis [PATH:ko00100]	3.00843	3.21e-05
Sobic.010G023600	K19355	MAN; mannan endo-1,4-beta-mannosidase [EC:3.2.1.78]	A09100 Metabolism	B 09101 Carbohydrate metabolism	C 00051 Fructose and mannose metabolism [PATH:ko00051]	3.20063	1.09e-08
Sobic.010G093400	K00703	glgA; starch synthase [EC:2.4.1.21]	A09100 Metabolism	B 09101 Carbohydrate metabolism	C 00500 Starch and sucrose metabolism [PATH:ko00500]	2.39296	0.00021481
Sobic.010G234600	K15227	TYRAAT; arogenate dehydrogenase (NADP+), plant [EC:1.3.1.78]	A09100 Metabolism	B 09105 Amino acid metabolism	C 00400 Phenylalanine, tyrosine and tryptophan biosynthesis [PATH:ko00400]	3.28875	1.39e-07
Sobic.010G252500	K09571	FKBP4_5; FK506-binding protein 4/5 [EC:5.2.1.8]	A09150 Organismal Systems	B 09152 Endocrine system	0	2.44771	0.000281
Sobic.010G275001	K09753	CCR; cinnamoyl-CoA reductase [EC:1.2.1.44]	A09100 Metabolism	B 09110 Biosynthesis of other secondary metabolites	C 00940 Phenylpropanoid biosynthesis [PATH:ko00940]	2.40864	0.0165879
Sobic.010G191750	K03456	PPP2R1; serine/threonine-protein phosphatase 2A regulatory subunit A	A09120 Genetic Information Processing	B 09122 Translation	C 03015 mRNA surveillance pathway [PATH:ko03015]	7.50336	7.23e-05
Sobic.010G224400	K03549	kup; KUP system potassium uptake protein	A09180 Brite Hierarchies	B 09183 Protein families: signaling and cellular processes	C 02000 Transporters [BR:ko02000]	3.11727	9.75e-05
Sobic.010G097900	K20782	HPAT; hydroxyproline O-arabinosyltransferase [EC:2.4.2.58]	A09100 Metabolism	B 09107 Glycan biosynthesis and metabolism	C 00514 Other types of O-glycan biosynthesis [PATH:ko00514]	6.86397	0.00187
Sobic.010G205700	K11699	RDR, RDRP; RNA-dependent RNA polymerase [EC:2.7.7.48]	A09180 Brite Hierarchies	B 09182 Protein families: genetic information processing	C 03036 Chromosome and associated proteins [BR:ko03036]	2.42443	1.09e-06
Sobic.010G069900	K20660	CYP709; cytochrome P450 family 709	A09180 Brite Hierarchies	B 09181 Protein families: metabolism	C 00199 Cytochrome P450 [BR:ko00199]	3.93412	1.2e-09
Sobic.010G253500	K01853	CAS1; cycloartenol synthase [EC:5.4.99.8]	A09100 Metabolism	B 09103 Lipid metabolism	C 00100 Steroid biosynthesis [PATH:ko00100]	7.66601	2.35e-05
Sobic.010G265600	K01689	ENO, eno; enolase [EC:4.2.1.11]	A09100 Metabolism	B 09101 Carbohydrate metabolism	C 00010 Glycolysis / Gluconeogenesis [PATH:ko00010]	3.80643	7.39e-14
Sobic.010G077650	K03327	TC.MATE, SLC47A, norM, mdtK, dinF; multidrug resistance protein, MATE family	A09180 Brite Hierarchies	B 09183 Protein families: signaling and cellular processes	C 02000 Transporters [BR:ko02000]	6.32902	0.0175338
Sobic.010G066601	K13065	E2.3.1.133, HCT; shikimate O-hydroxycinnamoyltransferase [EC:2.3.1.133]	A09100 Metabolism	B 09110 Biosynthesis of other secondary metabolites	C 00940 Phenylpropanoid biosynthesis [PATH:ko00940]	3.38335	9.89e-08
Sobic.003G025000	K07517	ECI1_2; Delta3-Delta2-enoyl-CoA isomerase [EC:5.3.3.8]	A09100 Metabolism	B 09103 Lipid metabolism	C 00071 Fatty acid degradation [PATH:ko00071]	2.47832	2.17e-06
Sobic.003G408900	K15400	HHT1; omega-hydroxypalmitate O-feruloyl transferase [EC:2.3.1.188]	A09100 Metabolism	B 09103 Lipid metabolism	C 00073 Cutin, suberine and wax biosynthesis [PATH:ko00073]	4.00206	0.00151425
Sobic.003G371400	K14638	SLC15A3_4, PHT; solute carrier family 15 (peptide/histidine transporter), member 3/4	A09180 Brite Hierarchies	B 09183 Protein families: signaling and cellular processes	C 02000 Transporters [BR:ko02000]	7.85777	8.03e-06
Sobic.003G223600	K08237	E2.4.1.218; hydroquinone glucosyltransferase [EC:2.4.1.218]	A09180 Brite Hierarchies	B 09181 Protein families: metabolism	C 01003 Glycosyltransferases [BR:ko01003]	2.88713	2.77e-07
Sobic.003G152100	K15892	FOLK; farnesol kinase [EC:2.7.1.216]	A09100 Metabolism	B 09109 Metabolism of terpenoids and polyketides	C 00900 Terpenoid backbone biosynthesis [PATH:ko00900]	9.15784	7.09e-11
Sobic.003G092500	K04506	SIAH1; E3 ubiquitin-protein ligase SIAH1 [EC:2.3.2.27]	A09120 Genetic Information Processing	B 09123 Folding, sorting and degradation	C 04120 Ubiquitin mediated proteolysis [PATH:ko04120]	7.03252	0.00121448
Sobic.003G415600	K02899	RP-L27, MRPL27, rpmA; large subunit ribosomal protein L27	A09120 Genetic Information Processing	B 09122 Translation	C 03010 Ribosome [PATH:ko03010]	2.01771	0.00149732
Sobic.003G264500	K15498	PPP6C; serine/threonine-protein phosphatase 6 catalytic subunit [EC:3.1.3.16]	A09180 Brite Hierarchies	B 09181 Protein families: metabolism	C 01009 Protein phosphatases and associated proteins [BR:ko01009]	9.26327	2.44e-11
Sobic.003G366200	K02133	ATPeF1B, ATP5B, ATP2; F-type H+-transporting ATPase subunit beta [EC:7.1.2.2]	A09100 Metabolism	B 09102 Energy metabolism	C 00190 Oxidative phosphorylation [PATH:ko00190]	2.41574	9.42e-05
Sobic.003G314533	K15283	SLC35E1; solute carrier family 35, member E1	A09180 Brite Hierarchies	B 09183 Protein families: signaling and cellular processes	C 02000 Transporters [BR:ko02000]	2.14676	0.0307573
Sobic.003G370400	K03320	amt, AMT, MEP; ammonium transporter, Amt family	A09180 Brite Hierarchies	B 09183 Protein families: signaling and cellular processes	C 02000 Transporters [BR:ko02000]	2.86291	0.00788442
Sobic.003G216166	K08711	ABCG2.PDR, CDR1; ATP-binding cassette, subfamily G (WHITE), member 2, PDR	A09130 Environmental Information Processing	B 09131 Membrane transport	C 02010 ABC transporters [PATH:ko02010]	4.19199	5.52e-09
Sobic.003G375100	K00919	ispE; 4-diphosphocytidyl-2-C-methyl-D-erythritol kinase [EC:2.7.1.148]	A09100 Metabolism	B 09109 Metabolism of terpenoids and polyketides	C 00900 Terpenoid backbone biosynthesis [PATH:ko00900]	2.09854	3.69e-05
Sobic.003G207900	K15015	SLC32A, VGAT; solute carrier family 32 (vesicular inhibitory amino acid transporter)	A09150 Organismal Systems	B 09156 Nervous system	0	2.41755	2.69e-05
Sobic.003G076800	K24184	CYP89A; cytochrome P450 family 89 subfamily A [EC:1.14.-.-]	A09180 Brite Hierarchies	B 09181 Protein families: metabolism	C 00199 Cytochrome P450 [BR:ko00199]	2.08911	0.00018944
Sobic.003G339900	K16900	TPC1, CCH1; two pore calcium channel protein, plant	A09180 Brite Hierarchies	B 09183 Protein families: signaling and cellular processes	C 04040 Ion channels [BR:ko04040]	3.20029	1.17e-10
Sobic.003G389400	K20180	VPS16; vacuolar protein sorting-associated protein 16	A09140 Cellular Processes	B 09141 Transport and catabolism	C 04138 Autophagy - yeast [PATH:ko04138]	5.87631	0.0719291
Sobic.003G430400	K10140	DDB2; DNA damage-binding protein 2	A09120 Genetic Information Processing	B 09123 Folding, sorting and degradation	C 04120 Ubiquitin mediated proteolysis [PATH:ko04120]	9.12091	1.09e-10
Sobic.003G031500	K15400	HHT1; omega-hydroxypalmitate O-feruloyl transferase [EC:2.3.1.188]	A09100 Metabolism	B 09103 Lipid metabolism	C 00073 Cutin, suberine and wax biosynthesis [PATH:ko00073]	3.24931	0.0314812
Sobic.003G273000	K21604	IAR3, ILL6; jasmonoyl-L-amino acid hydrolase [EC:3.5.1.127]	A09180 Brite Hierarchies	B 09181 Protein families: metabolism	C 01002 Peptidases and inhibitors [BR:ko01002]	2.607	0.00766316
Sobic.003G286800	K03347	CUL1, CDC53; cullin 1	A09120 Genetic Information Processing	B 09123 Folding, sorting and degradation	C 04141 Protein processing in endoplasmic reticulum [PATH:ko04141]	2.57939	2.8e-05
Sobic.003G278600	K17471	SULTR3; sulfate transporter 3	A09180 Brite Hierarchies	B 09183 Protein families: signaling and cellular processes	C 02000 Transporters [BR:ko02000]	2.33468	7.26e-06
Sobic.003G306500	K14487	GH3; auxin responsive GH3 gene family	A09130 Environmental Information Processing	B 09132 Signal transduction	C 04075 Plant hormone signal transduction [PATH:ko04075]	6.86397	0.00187
Sobic.003G386500	K05681	ABCG2, CD338; ATP-binding cassette, subfamily G (WHITE), member 2	A09130 Environmental Information Processing	B 09131 Membrane transport	C 02010 ABC transporters [PATH:ko02010]	3.54601	0.00988149
Sobic.003G199600	K00430	E1.11.1.7; peroxidase [EC:1.11.1.7]	A09100 Metabolism	B 09110 Biosynthesis of other secondary metabolites	C 00940 Phenylpropanoid biosynthesis [PATH:ko00940]	6.56727	0.00702131
Sobic.003G203600	K12355	REF1; coniferyl-aldehyde dehydrogenase [EC:1.2.1.68]	A09100 Metabolism	B 09110 Biosynthesis of other secondary metabolites	C 00940 Phenylpropanoid biosynthesis [PATH:ko00940]	5.21403	1.65e-15
Sobic.003G129400	K20869	IRX9; putative beta-1,4-xylosyltransferase IRX9 [EC:2.4.2.-]	A09180 Brite Hierarchies	B 09181 Protein families: metabolism	C 01003 Glycosyltransferases [BR:ko01003]	2.37998	8.02e-05
Sobic.003G175100	K03106	SRP54, ffh; signal recognition particle subunit SRP54 [EC:3.6.5.4]	A09120 Genetic Information Processing	B 09123 Folding, sorting and degradation	C 03060 Protein export [PATH:ko03060]	3.55965	5.53e-10
Sobic.003G353800	K23050	PCBER1; phenylcoumaran benzylic ether reductase [EC:1.3.1.-]	A09180 Brite Hierarchies	B 09191 Unclassified: metabolism	C 99980 Enzymes with EC numbers	2.59183	2.02e-06
Sobic.003G427300	K13421	UMPS; uridine monophosphate synthetase [EC:2.4.2.10 4.1.1.23]	A09100 Metabolism	B 09104 Nucleotide metabolism	C 00240 Pyrimidine metabolism [PATH:ko00240]	2.35039	0.00016903
Sobic.003G236150	K00844	HK; hexokinase [EC:2.7.1.1]	A09100 Metabolism	B 09101 Carbohydrate metabolism	C 00010 Glycolysis / Gluconeogenesis [PATH:ko00010]	8.44065	7.04e-08
Sobic.003G333100	K08678	UXS1, uxs; UDP-glucuronate decarboxylase [EC:4.1.1.35]	A09100 Metabolism	B 09101 Carbohydrate metabolism	C 00520 Amino sugar and nucleotide sugar metabolism [PATH:ko00520]	2.47081	8.24e-05
Sobic.003G019700	K03444	ERD6, ESL1; MFS transporter, SP family, ERD6-like sugar transporter	A09180 Brite Hierarchies	B 09183 Protein families: signaling and cellular processes	C 02000 Transporters [BR:ko02000]	2.87159	2.83e-09
Sobic.003G282800	K13606	NOL, NYC1; chlorophyll(ide) b reductase [EC:1.1.1.294]	A09100 Metabolism	B 09108 Metabolism of cofactors and vitamins	C 00860 Porphyrin and chlorophyll metabolism [PATH:ko00860]	6.77169	0.00288816
Sobic.003G276400	K01176	AMY, amyA, malS; alpha-amylase [EC:3.2.1.1]	A09100 Metabolism	B 09101 Carbohydrate metabolism	C 00500 Starch and sucrose metabolism [PATH:ko00500]	3.51776	9.04e-13
Sobic.003G415900	K00430	E1.11.1.7; peroxidase [EC:1.11.1.7]	A09100 Metabolism	B 09110 Biosynthesis of other secondary metabolites	C 00940 Phenylpropanoid biosynthesis [PATH:ko00940]	2.32705	3.16e-06
Sobic.003G018800	K23978	IAH1; isoamyl acetate esterase [EC:3.1.1.112]	A09180 Brite Hierarchies	B 09191 Unclassified: metabolism	C 99980 Enzymes with EC numbers	7.81216	1.14e-05
Sobic.003G146100	K15849	PAT, AAT; bifunctional aspartate aminotransferase and glutamate/aspartate-prephenate aminotransferase [EC:2.6.1.1 2.6.1.78 2.6.1.79]	A09100 Metabolism	B 09105 Amino acid metabolism	C 00350 Tyrosine metabolism [PATH:ko00350]	9.34561	9.05e-12
Sobic.003G341100	K13424	WRKY33; WRKY transcription factor 33	A09130 Environmental Information Processing	B 09132 Signal transduction	C 04016 MAPK signaling pathway - plant [PATH:ko04016]	4.25585	2.65e-14
Sobic.003G387200	K07897	RAB7A; Ras-related protein Rab-7A	A09140 Cellular Processes	B 09141 Transport and catabolism	C 04144 Endocytosis [PATH:ko04144]	4.24084	3.57e-09
Sobic.003G312300	K00547	mmuM, BHMT2; homocysteine S-methyltransferase [EC:2.1.1.10]	A09100 Metabolism	B 09105 Amino acid metabolism	C 00270 Cysteine and methionine metabolism [PATH:ko00270]	9.77205	7.55e-14
Sobic.003G216232	K08711	ABCG2.PDR, CDR1; ATP-binding cassette, subfamily G (WHITE), member 2, PDR	A09130 Environmental Information Processing	B 09131 Membrane transport	C 02010 ABC transporters [PATH:ko02010]	2.95777	4.55e-08
Sobic.003G270800	K02575	NRT, narK, nrtP, nasA; MFS transporter, NNP family, nitrate/nitrite transporter	A09100 Metabolism	B 09102 Energy metabolism	C 00910 Nitrogen metabolism [PATH:ko00910]	2.37247	2.87e-06
Sobic.003G339800	K25193	SDC; serine decarboxylase [EC:4.1.1.-]	A09100 Metabolism	B 09103 Lipid metabolism	C 00564 Glycerophospholipid metabolism [PATH:ko00564]	3.02605	1.21e-05
Sobic.003G000600	K08819	CDK12_13; cyclin-dependent kinase 12/13 [EC:2.7.11.22 2.7.11.23]	A09180 Brite Hierarchies	B 09181 Protein families: metabolism	C 01001 Protein kinases [BR:ko01001]	3.54797	2.31e-11
Sobic.003G116800	K05658	ABCB1, CD243; ATP-binding cassette, subfamily B (MDR/TAP), member 1 [EC:7.6.2.2]	A09130 Environmental Information Processing	B 09131 Membrane transport	C 02010 ABC transporters [PATH:ko02010]	7.38376	0.00015655
Sobic.003G413600	K03549	kup; KUP system potassium uptake protein	A09180 Brite Hierarchies	B 09183 Protein families: signaling and cellular processes	C 02000 Transporters [BR:ko02000]	2.0392	0.00011652
Sobic.003G367200	K19040	ATL76S; E3 ubiquitin-protein ligase ATL10/75/76/77/78 [EC:2.3.2.27]	A09180 Brite Hierarchies	B 09182 Protein families: genetic information processing	C 04121 Ubiquitin system [BR:ko04121]	2.02624	0.00729881
Sobic.003G040300	K08955	YME1; ATP-dependent metalloprotease [EC:3.4.24.-]	A09140 Cellular Processes	B 09141 Transport and catabolism	C 04139 Mitophagy - yeast [PATH:ko04139]	3.47264	0.00241299
Sobic.003G318700	K00901	dgkA, DGK; diacylglycerol kinase (ATP) [EC:2.7.1.107]	A09100 Metabolism	B 09103 Lipid metabolism	C 00561 Glycerolipid metabolism [PATH:ko00561]	2.01461	0.00061624
Sobic.003G376000	K24917	AAP; amino acid permease	A09180 Brite Hierarchies	B 09183 Protein families: signaling and cellular processes	C 02000 Transporters [BR:ko02000]	3.26023	4.11e-10
Sobic.003G360600	K15401	CYP86A1; long-chain fatty acid omega-monooxygenase [EC:1.14.14.80]	A09100 Metabolism	B 09103 Lipid metabolism	C 00071 Fatty acid degradation [PATH:ko00071]	3.05156	9.24e-07
Sobic.003G164800	K01955	carB, CPA2; carbamoyl-phosphate synthase large subunit [EC:6.3.5.5]	A09100 Metabolism	B 09104 Nucleotide metabolism	C 00240 Pyrimidine metabolism [PATH:ko00240]	8.41037	9.44e-08
Sobic.003G100000	K05350	bglB; beta-glucosidase [EC:3.2.1.21]	A09100 Metabolism	B 09101 Carbohydrate metabolism	C 00500 Starch and sucrose metabolism [PATH:ko00500]	2.95107	0.00036182
Sobic.003G026600	K16223	FT; protein FLOWERING LOCUS T	A09150 Organismal Systems	B 09159 Environmental adaptation	0	2.67009	2.77e-07
Sobic.003G154400	K16297	SCPL-II; serine carboxypeptidase-like clade II [EC:3.4.16.-]	A09180 Brite Hierarchies	B 09181 Protein families: metabolism	C 01002 Peptidases and inhibitors [BR:ko01002]	4.13568	2.8e-05
Sobic.003G017300	K01937	pyrG, CTPS; CTP synthase [EC:6.3.4.2]	A09100 Metabolism	B 09104 Nucleotide metabolism	C 00240 Pyrimidine metabolism [PATH:ko00240]	6.19331	0.0278827
Sobic.003G280500	K03234	EEF2; elongation factor 2	A09130 Environmental Information Processing	B 09132 Signal transduction	C 04152 AMPK signaling pathway [PATH:ko04152]	6.45306	0.0110442
Sobic.003G050300	K00430	E1.11.1.7; peroxidase [EC:1.11.1.7]	A09100 Metabolism	B 09110 Biosynthesis of other secondary metabolites	C 00940 Phenylpropanoid biosynthesis [PATH:ko00940]	2.4185	0.00022835
Sobic.003G182200	K12124	GI; GIGANTEA	A09150 Organismal Systems	B 09159 Environmental adaptation	0	4.24168	0.00036023
Sobic.003G429300	K22846	CS26; S-sulfo-L-cysteine synthase (O-acetyl-L-serine-dependent) [EC:2.5.1.144]	A09100 Metabolism	B 09105 Amino acid metabolism	C 00270 Cysteine and methionine metabolism [PATH:ko00270]	4.69818	2.55e-07
Sobic.003G048000	K10733	GINS2, PSF2; GINS complex subunit 2	A09180 Brite Hierarchies	B 09182 Protein families: genetic information processing	C 03032 DNA replication proteins [BR:ko03032]	2.51242	4e-07
Sobic.003G236900	K10752	RBBP4, HAT2, CAF1, MIS16; histone-binding protein RBBP4	A09140 Cellular Processes	B 09143 Cell growth and death	C 04218 Cellular senescence [PATH:ko04218]	2.43003	0.00032549
Sobic.003G086200	K16055	TPS; trehalose 6-phosphate synthase/phosphatase [EC:2.4.1.15 3.1.3.12]	A09100 Metabolism	B 09101 Carbohydrate metabolism	C 00500 Starch and sucrose metabolism [PATH:ko00500]	2.88498	7.41e-09
Sobic.003G102200	K08286	E2.7.11.-; protein-serine/threonine kinase [EC:2.7.11.-]	A09180 Brite Hierarchies	B 09191 Unclassified: metabolism	C 99980 Enzymes with EC numbers	5.40865	6.07e-18
Sobic.003G136500	K02987	RP-S4e, RPS4; small subunit ribosomal protein S4e	A09120 Genetic Information Processing	B 09122 Translation	C 03010 Ribosome [PATH:ko03010]	3.47934	0.00018992
Sobic.003G276000	K18693	DPP1, DPPL, PLPP4_5; diacylglycerol diphosphate phosphatase / phosphatidate phosphatase [EC:3.1.3.81 3.1.3.4]	A09100 Metabolism	B 09103 Lipid metabolism	C 00561 Glycerolipid metabolism [PATH:ko00561]	11.4105	4.05e-22
Sobic.003G337100	K08334	BECN, VPS30, ATG6; beclin	A09130 Environmental Information Processing	B 09132 Signal transduction	C 04371 Apelin signaling pathway [PATH:ko04371]	3.11179	2.55e-07
Sobic.003G036700	K00279	CKX; cytokinin dehydrogenase [EC:1.5.99.12]	A09100 Metabolism	B 09109 Metabolism of terpenoids and polyketides	C 00908 Zeatin biosynthesis [PATH:ko00908]	7.18342	0.00052673
Sobic.003G194900	K01803	TPI, tpiA; triosephosphate isomerase (TIM) [EC:5.3.1.1]	A09100 Metabolism	B 09101 Carbohydrate metabolism	C 00010 Glycolysis / Gluconeogenesis [PATH:ko00010]	7.55964	4.93e-05
Sobic.003G186300	K13207	CUGBP, BRUNOL, CELF; CUG-BP- and ETR3-like factor	A09180 Brite Hierarchies	B 09182 Protein families: genetic information processing	C 03041 Spliceosome [BR:ko03041]	2.87089	8.61e-06
Sobic.003G389500	K15032	MTERFD; mTERF domain-containing protein, mitochondrial	A09180 Brite Hierarchies	B 09182 Protein families: genetic information processing	C 03012 Translation factors [BR:ko03012]	2.14589	0.0009898
Sobic.003G293700	K00029	E1.1.1.40, maeB; malate dehydrogenase (oxaloacetate-decarboxylating)(NADP+) [EC:1.1.1.40]	A09100 Metabolism	B 09101 Carbohydrate metabolism	C 00620 Pyruvate metabolism [PATH:ko00620]	8.28244	3.14e-07
Sobic.003G393400	K07195	EXOC7, EXO70; exocyst complex component 7	A09150 Organismal Systems	B 09152 Endocrine system	0	2.93967	0.0108207
Sobic.009G167000	K03538	POP4, RPP29; ribonuclease P protein subunit POP4 [EC:3.1.26.5]	A09120 Genetic Information Processing	B 09122 Translation	C 03008 Ribosome biogenesis in eukaryotes [PATH:ko03008]	2.03982	0.00072125
Sobic.009G080400	K18482	ADCL; 4-amino-4-deoxychorismate lyase [EC:4.1.3.38]	A09100 Metabolism	B 09108 Metabolism of cofactors and vitamins	C 00790 Folate biosynthesis [PATH:ko00790]	2.6417	0.0182576
Sobic.009G025100	K11155	DGAT1; diacylglycerol O-acyltransferase 1 [EC:2.3.1.20 2.3.1.75 2.3.1.76]	A09100 Metabolism	B 09103 Lipid metabolism	C 00561 Glycerolipid metabolism [PATH:ko00561]	7.55964	4.93e-05
Sobic.009G168800	K15032	MTERFD; mTERF domain-containing protein, mitochondrial	A09180 Brite Hierarchies	B 09182 Protein families: genetic information processing	C 03012 Translation factors [BR:ko03012]	7.85777	8.03e-06
Sobic.009G200300	K17973	NAA25, MDM20; N-terminal acetyltransferase B complex non-catalytic subunit	A09180 Brite Hierarchies	B 09182 Protein families: genetic information processing	C 03029 Mitochondrial biogenesis [BR:ko03029]	7.03252	0.00121448
Sobic.009G085900	K01409	KAE1, tsaD, QRI7; N6-L-threonylcarbamoyladenine synthase [EC:2.3.1.234]	A09180 Brite Hierarchies	B 09182 Protein families: genetic information processing	C 03016 Transfer RNA biogenesis [BR:ko03016]	2.3418	7.68e-07
Sobic.009G185501	K11671	NFRKB, INO80G; nuclear factor related to kappa-B-binding protein	A09180 Brite Hierarchies	B 09182 Protein families: genetic information processing	C 03036 Chromosome and associated proteins [BR:ko03036]	2.16235	0.00524408
Sobic.009G136400	K01103	PFKFB3; 6-phosphofructo-2-kinase / fructose-2,6-biphosphatase 3 [EC:2.7.1.105 3.1.3.46]	A09100 Metabolism	B 09101 Carbohydrate metabolism	C 00051 Fructose and mannose metabolism [PATH:ko00051]	2.86388	2.24e-08
Sobic.009G169000	K01568	PDC, pdc; pyruvate decarboxylase [EC:4.1.1.1]	A09100 Metabolism	B 09101 Carbohydrate metabolism	C 00010 Glycolysis / Gluconeogenesis [PATH:ko00010]	7.10994	0.00079481
Sobic.009G075900	K09874	NIP; aquaporin NIP	A09180 Brite Hierarchies	B 09183 Protein families: signaling and cellular processes	C 02000 Transporters [BR:ko02000]	2.35823	3.42e-06
Sobic.009G044400	K05933	E1.14.17.4; aminocyclopropanecarboxylate oxidase [EC:1.14.17.4]	A09100 Metabolism	B 09105 Amino acid metabolism	C 00270 Cysteine and methionine metabolism [PATH:ko00270]	2.18276	2.47e-05
Sobic.009G210300	K06268	PPP3R, CNB; serine/threonine-protein phosphatase 2B regulatory subunit	A09130 Environmental Information Processing	B 09132 Signal transduction	C 04010 MAPK signaling pathway [PATH:ko04010]	2.79334	4.3e-05
Sobic.009G009300	K15803	GERD; (-)-germacrene D synthase [EC:4.2.3.75]	A09100 Metabolism	B 09109 Metabolism of terpenoids and polyketides	C 00909 Sesquiterpenoid and triterpenoid biosynthesis [PATH:ko00909]	2.49695	9.03e-07
Sobic.009G038100	K00134	GAPDH, gapA; glyceraldehyde 3-phosphate dehydrogenase (phosphorylating) [EC:1.2.1.12]	A09100 Metabolism	B 09101 Carbohydrate metabolism	C 00010 Glycolysis / Gluconeogenesis [PATH:ko00010]	2.06135	2.75e-05
Sobic.009G063450	K07874	RAB1A; Ras-related protein Rab-1A	A09140 Cellular Processes	B 09141 Transport and catabolism	C 04140 Autophagy - animal [PATH:ko04140]	3.04843	2.23e-05
Sobic.009G130100	K20547	CHIB; basic endochitinase B [EC:3.2.1.14]	A09100 Metabolism	B 09101 Carbohydrate metabolism	C 00520 Amino sugar and nucleotide sugar metabolism [PATH:ko00520]	3.38531	4.26e-10
Sobic.009G241500	K10703	HACD, PHS1, PAS2; very-long-chain (3R)-3-hydroxyacyl-CoA dehydratase [EC:4.2.1.134]	A09100 Metabolism	B 09103 Lipid metabolism	C 00062 Fatty acid elongation [PATH:ko00062]	3.07696	2.88e-09
Sobic.009G043500	K00387	SUOX; sulfite oxidase [EC:1.8.3.1]	A09100 Metabolism	B 09102 Energy metabolism	C 00920 Sulfur metabolism [PATH:ko00920]	4.9986	4.33e-13
Sobic.009G099600	K21867	AKT, KAT, GORK, SKOR; potassium channel	A09180 Brite Hierarchies	B 09183 Protein families: signaling and cellular processes	C 02000 Transporters [BR:ko02000]	2.37034	0.00161737
Sobic.009G203700	K14484	IAA; auxin-responsive protein IAA	A09130 Environmental Information Processing	B 09132 Signal transduction	C 04075 Plant hormone signal transduction [PATH:ko04075]	6.44563	1.53e-18
Sobic.009G144700	K00430	E1.11.1.7; peroxidase [EC:1.11.1.7]	A09100 Metabolism	B 09110 Biosynthesis of other secondary metabolites	C 00940 Phenylpropanoid biosynthesis [PATH:ko00940]	7.90197	5.69e-06
Sobic.009G245600	K11644	SIN3A; paired amphipathic helix protein Sin3a	A09140 Cellular Processes	B 09141 Transport and catabolism	C 04139 Mitophagy - yeast [PATH:ko04139]	2.06366	0.00309561
Sobic.009G090100	K16297	SCPL-II; serine carboxypeptidase-like clade II [EC:3.4.16.-]	A09180 Brite Hierarchies	B 09181 Protein families: metabolism	C 01002 Peptidases and inhibitors [BR:ko01002]	2.12805	8.73e-05
Sobic.009G171600	K13424	WRKY33; WRKY transcription factor 33	A09130 Environmental Information Processing	B 09132 Signal transduction	C 04016 MAPK signaling pathway - plant [PATH:ko04016]	9.17596	5.73e-11
Sobic.009G036100	K24194	BOR; boron transporter	A09180 Brite Hierarchies	B 09183 Protein families: signaling and cellular processes	C 02000 Transporters [BR:ko02000]	4.72467	1.47e-10
Sobic.009G071800	K00850	pfkA, PFK; 6-phosphofructokinase 1 [EC:2.7.1.11]	A09100 Metabolism	B 09101 Carbohydrate metabolism	C 00010 Glycolysis / Gluconeogenesis [PATH:ko00010]	5.93096	4.3e-13
Sobic.009G068900	K08472	MLO; mlo protein	A09180 Brite Hierarchies	B 09183 Protein families: signaling and cellular processes	C 04030 G protein-coupled receptors [BR:ko04030]	2.98381	8.18e-09
Sobic.009G005800	K03671	trxA; thioredoxin 1	A09150 Organismal Systems	B 09151 Immune system	C 04621 NOD-like receptor signaling pathway [PATH:ko04621]	2.41471	0.00192617
Sobic.009G022000	K05681	ABCG2, CD338; ATP-binding cassette, subfamily G (WHITE), member 2	A09130 Environmental Information Processing	B 09131 Membrane transport	C 02010 ABC transporters [PATH:ko02010]	2.5519	2.77e-07
Sobic.009G214000	K04460	PPP5C; serine/threonine-protein phosphatase 5 [EC:3.1.3.16]	A09130 Environmental Information Processing	B 09132 Signal transduction	C 04010 MAPK signaling pathway [PATH:ko04010]	2.22946	2.41e-05
Sobic.009G208000	K09419	HSFF; heat shock transcription factor, other eukaryote	A09180 Brite Hierarchies	B 09182 Protein families: genetic information processing	C 03000 Transcription factors [BR:ko03000]	2.36444	0.00014911
Sobic.009G009500	K07198	PRKAA, AMPK; 5'-AMP-activated protein kinase, catalytic alpha subunit [EC:2.7.11.11]	A09130 Environmental Information Processing	B 09132 Signal transduction	C 04371 Apelin signaling pathway [PATH:ko04371]	2.00936	2.49e-05
Sobic.009G235600	K03444	ERD6, ESL1; MFS transporter, SP family, ERD6-like sugar transporter	A09180 Brite Hierarchies	B 09183 Protein families: signaling and cellular processes	C 02000 Transporters [BR:ko02000]	2.7754	6.95e-08
Sobic.009G118600	K03265	ETF1, ERF1; peptide chain release factor subunit 1	A09120 Genetic Information Processing	B 09122 Translation	C 03015 mRNA surveillance pathway [PATH:ko03015]	2.53571	3.45e-05
Sobic.009G070950	K21249	UVRAG; UV radiation resistance-associated gene protein	A09140 Cellular Processes	B 09141 Transport and catabolism	C 04140 Autophagy - animal [PATH:ko04140]	2.20949	0.0109853
Sobic.009G241000	K15397	KCS; 3-ketoacyl-CoA synthase [EC:2.3.1.199]	A09100 Metabolism	B 09103 Lipid metabolism	C 00062 Fatty acid elongation [PATH:ko00062]	7.32002	0.00023245
Sobic.005G018200	K14641	APY; apyrase [EC:3.6.1.5]	A09100 Metabolism	B 09104 Nucleotide metabolism	C 00230 Purine metabolism [PATH:ko00230]	3.23145	2.42e-08
Sobic.005G055300	K08081	TR1; tropinone reductase I [EC:1.1.1.206]	A09100 Metabolism	B 09110 Biosynthesis of other secondary metabolites	C 00960 Tropane, piperidine and pyridine alkaloid biosynthesis [PATH:ko00960]	2.29291	0.0150834
Sobic.005G065100	K11968	ARIH1; ariadne-1 [EC:2.3.2.31]	A09180 Brite Hierarchies	B 09182 Protein families: genetic information processing	C 04121 Ubiquitin system [BR:ko04121]	2.06313	0.00943747
Sobic.005G137200	K00660	CHS; chalcone synthase [EC:2.3.1.74]	A09100 Metabolism	B 09110 Biosynthesis of other secondary metabolites	C 00941 Flavonoid biosynthesis [PATH:ko00941]	7.18342	0.00052673
Sobic.005G193600	K15397	KCS; 3-ketoacyl-CoA synthase [EC:2.3.1.199]	A09100 Metabolism	B 09103 Lipid metabolism	C 00062 Fatty acid elongation [PATH:ko00062]	6.86397	0.00187
Sobic.005G037000	K20624	CYP94C1; 12-hydroxyjasmonoyl-L-amino acid 12-hydroxylase / fatty acid hydroxylase [EC:1.14.14.49]	A09180 Brite Hierarchies	B 09181 Protein families: metabolism	C 00199 Cytochrome P450 [BR:ko00199]	10.1566	9.19e-15
Sobic.005G119300	K22132	tcdA; tRNA threonylcarbamoyladenosine dehydratase	A09180 Brite Hierarchies	B 09182 Protein families: genetic information processing	C 03016 Transfer RNA biogenesis [BR:ko03016]	7.18342	0.00052673
Sobic.005G226100	K13457	RPM1, RPS3; disease resistance protein RPM1	A09150 Organismal Systems	B 09159 Environmental adaptation	0	7.61381	3.38e-05
Sobic.005G171200	K24193	STP; MFS transporter, SP family, sugar:H+ symporter	A09180 Brite Hierarchies	B 09183 Protein families: signaling and cellular processes	C 02000 Transporters [BR:ko02000]	2.92907	3e-06
Sobic.005G215900	K08500	SYP6; syntaxin of plants SYP6	A09120 Genetic Information Processing	B 09123 Folding, sorting and degradation	C 04130 SNARE interactions in vesicular transport [PATH:ko04130]	8.85465	1.74e-09
Sobic.005G172900	K08237	E2.4.1.218; hydroquinone glucosyltransferase [EC:2.4.1.218]	A09180 Brite Hierarchies	B 09181 Protein families: metabolism	C 01003 Glycosyltransferases [BR:ko01003]	2.10756	1.09e-05
Sobic.005G127800	K13457	RPM1, RPS3; disease resistance protein RPM1	A09150 Organismal Systems	B 09159 Environmental adaptation	0	10.1474	1.05e-14
Sobic.005G050800	K01183	E3.2.1.14; chitinase [EC:3.2.1.14]	A09100 Metabolism	B 09101 Carbohydrate metabolism	C 00520 Amino sugar and nucleotide sugar metabolism [PATH:ko00520]	7.18342	0.00052673
Sobic.005G099500	K20241	WDR44, RAB11BP; WD repeat-containing protein 44	A09180 Brite Hierarchies	B 09182 Protein families: genetic information processing	C 04131 Membrane trafficking [BR:ko04131]	2.16738	0.00065455
Sobic.005G033801	K10532	HGSNAT; heparan-alpha-glucosaminide N-acetyltransferase [EC:2.3.1.78]	A09100 Metabolism	B 09107 Glycan biosynthesis and metabolism	C 00531 Glycosaminoglycan degradation [PATH:ko00531]	8.2486	4.25e-07
Sobic.005G092600	K13457	RPM1, RPS3; disease resistance protein RPM1	A09150 Organismal Systems	B 09159 Environmental adaptation	0	2.09956	1.79e-05
Sobic.005G136300	K00660	CHS; chalcone synthase [EC:2.3.1.74]	A09100 Metabolism	B 09110 Biosynthesis of other secondary metabolites	C 00941 Flavonoid biosynthesis [PATH:ko00941]	6.60738	1.61e-19
Sobic.005G216100	K00660	CHS; chalcone synthase [EC:2.3.1.74]	A09100 Metabolism	B 09110 Biosynthesis of other secondary metabolites	C 00941 Flavonoid biosynthesis [PATH:ko00941]	3.16312	1.87e-07
Sobic.005G096300	K01251	E3.3.1.1, ahcY; adenosylhomocysteinase [EC:3.3.1.1]	A09100 Metabolism	B 09105 Amino acid metabolism	C 00270 Cysteine and methionine metabolism [PATH:ko00270]	2.27522	2.08e-06
Sobic.005G088400	K09755	CYP84A, F5H; ferulate-5-hydroxylase [EC:1.14.-.-]	A09100 Metabolism	B 09110 Biosynthesis of other secondary metabolites	C 00940 Phenylpropanoid biosynthesis [PATH:ko00940]	6.56727	0.00702131
Sobic.005G132300	K05917	CYP51; sterol 14alpha-demethylase [EC:1.14.14.154 1.14.15.36]	A09100 Metabolism	B 09103 Lipid metabolism	C 00100 Steroid biosynthesis [PATH:ko00100]	5.46943	0.116131
Sobic.005G219100	K13457	RPM1, RPS3; disease resistance protein RPM1	A09150 Organismal Systems	B 09159 Environmental adaptation	0	6.20796	1.51e-10
Sobic.005G208900	K11968	ARIH1; ariadne-1 [EC:2.3.2.31]	A09180 Brite Hierarchies	B 09182 Protein families: genetic information processing	C 04121 Ubiquitin system [BR:ko04121]	2.31347	5.62e-06
Sobic.005G087800	K17506	PPM1L, PP2CE; protein phosphatase 1L [EC:3.1.3.16]	A09180 Brite Hierarchies	B 09181 Protein families: metabolism	C 01009 Protein phosphatases and associated proteins [BR:ko01009]	7.85777	8.03e-06
Sobic.005G175800	K00660	CHS; chalcone synthase [EC:2.3.1.74]	A09100 Metabolism	B 09110 Biosynthesis of other secondary metabolites	C 00941 Flavonoid biosynthesis [PATH:ko00941]	2.93967	0.0108207
Sobic.005G131700	K15803	GERD; (-)-germacrene D synthase [EC:4.2.3.75]	A09100 Metabolism	B 09109 Metabolism of terpenoids and polyketides	C 00909 Sesquiterpenoid and triterpenoid biosynthesis [PATH:ko00909]	6.19331	0.0278827
Sobic.005G082700	K19825	DBR; 2-alkenal reductase (NADP+) [EC:1.3.1.102]	A09180 Brite Hierarchies	B 09191 Unclassified: metabolism	C 99980 Enzymes with EC numbers	2.18582	9.94e-06
Sobic.005G131800	K03006	RPB1, POLR2A; DNA-directed RNA polymerase II subunit RPB1 [EC:2.7.7.6]	A09120 Genetic Information Processing	B 09121 Transcription	C 03020 RNA polymerase [PATH:ko03020]	6.0435	0.044687
Sobic.005G195200	K10532	HGSNAT; heparan-alpha-glucosaminide N-acetyltransferase [EC:2.3.1.78]	A09100 Metabolism	B 09107 Glycan biosynthesis and metabolism	C 00531 Glycosaminoglycan degradation [PATH:ko00531]	3.7603	2.75e-13
Sobic.005G029200	K13448	CML; calcium-binding protein CML	A09150 Organismal Systems	B 09159 Environmental adaptation	0	2.05815	0.00010987
Sobic.005G103100	K13457	RPM1, RPS3; disease resistance protein RPM1	A09150 Organismal Systems	B 09159 Environmental adaptation	0	8.61012	1.77e-08
Sobic.005G137000	K00660	CHS; chalcone synthase [EC:2.3.1.74]	A09100 Metabolism	B 09110 Biosynthesis of other secondary metabolites	C 00941 Flavonoid biosynthesis [PATH:ko00941]	8.94193	6.56e-10
Sobic.005G121200	K06628	CDC45; cell division control protein 45	A09140 Cellular Processes	B 09143 Cell growth and death	C 04110 Cell cycle [PATH:ko04110]	2.95298	1.02e-08
Sobic.005G094800	K00128	ALDH; aldehyde dehydrogenase (NAD+) [EC:1.2.1.3]	A09100 Metabolism	B 09101 Carbohydrate metabolism	C 00010 Glycolysis / Gluconeogenesis [PATH:ko00010]	2.06395	2.06e-05
Sobic.005G080200	K11838	USP7, UBP15; ubiquitin carboxyl-terminal hydrolase 7 [EC:3.4.19.12]	A09130 Environmental Information Processing	B 09132 Signal transduction	C 04068 FoxO signaling pathway [PATH:ko04068]	2.25983	4.61e-05
Sobic.005G192100	K13457	RPM1, RPS3; disease resistance protein RPM1	A09150 Organismal Systems	B 09159 Environmental adaptation	0	3.35514	0.0214905
Sobic.005G222900	K13457	RPM1, RPS3; disease resistance protein RPM1	A09150 Organismal Systems	B 09159 Environmental adaptation	0	2.06368	1.5e-05
Sobic.005G217900	K08286	E2.7.11.-; protein-serine/threonine kinase [EC:2.7.11.-]	A09180 Brite Hierarchies	B 09191 Unclassified: metabolism	C 99980 Enzymes with EC numbers	2.46738	2.48e-07
Sobic.005G109000	K20665	CYP94B; jasmonoyl-L-amino acid 12-hydroxylase [EC:1.14.14.48]	A09180 Brite Hierarchies	B 09181 Protein families: metabolism	C 00199 Cytochrome P450 [BR:ko00199]	2.3789	2.8e-06
Sobic.005G139700	K13447	RBOH; respiratory burst oxidase [EC:1.6.3.- 1.11.1.-]	A09130 Environmental Information Processing	B 09132 Signal transduction	C 04016 MAPK signaling pathway - plant [PATH:ko04016]	2.21059	4.45e-06
Sobic.005G103900	K08867	WNK, PRKWNK; WNK lysine deficient protein kinase [EC:2.7.11.1]	A09180 Brite Hierarchies	B 09181 Protein families: metabolism	C 01001 Protein kinases [BR:ko01001]	3.971	1.04e-08
[truncated: 1,121 more rows]

[truncated: 5 more sheets: Tx2783_12dpi, Btx623_3dpi, Btx623_6dpi, BTx623_9dpi, BTx623_12dpi]
